# Supplementary material for: Associations between biological and sociodemographic risks for developmental vulnerability in twins at age 5: a population data linkage study in Western Australia
Source: PubMed Central journal article supplement — BMJ Open. 2020 Oct 16;10(10):e038846. doi: 10.1136/bmjopen-2020-038846 (PMC7569973; doi:10.1136/bmjopen-2020-038846), 2020-10-16
Supplement: bmjopen-2020-038846.draft_revisions.pdf [file bmjopen-2020-038846.draft_revisions.pdf]

# BMJ Open

BMJ Open is committed to open peer review. As part of this commitment we make the peer review history of every article we publish publicly available.

When an article is published we post the peer reviewers' comments and the authors' responses online. We also post the versions of the paper that were used during peer review. These are the versions that the peer review comments apply to.

The versions of the paper that follow are the versions that were submitted during the peer review process. They are not the versions of record or the final published versions. They should not be cited or distributed as the published version of this manuscript.

BMJ Open is an open access journal and the full, final, typeset and author-corrected version of record of the manuscript is available on our site with no access controls, subscription charges or pay-per-view fees (<http://bmjopen.bmj.com>).

If you have any questions on BMJ Open's open peer review process please email [info.bmjopen@bmj.com](mailto:info.bmjopen@bmj.com)

# BMJ Open

## The associations between biological and sociodemographic risks for developmental vulnerability in twins at age five: A population data linkage study in Western Australia.

|                               |                                                                                                                                                                                                                                                                                                                                                                                                                              |
|-------------------------------|------------------------------------------------------------------------------------------------------------------------------------------------------------------------------------------------------------------------------------------------------------------------------------------------------------------------------------------------------------------------------------------------------------------------------|
| Journal:                      | <i>BMJ Open</i>                                                                                                                                                                                                                                                                                                                                                                                                              |
| Manuscript ID                 | bmjopen-2020-038846                                                                                                                                                                                                                                                                                                                                                                                                          |
| Article Type:                 | Original research                                                                                                                                                                                                                                                                                                                                                                                                            |
| Date Submitted by the Author: | 26-Mar-2020                                                                                                                                                                                                                                                                                                                                                                                                                  |
| Complete List of Authors:     | Dhamrait, Gursimran; Telethon Kids Institute, ; The University of Western Australia Faculty of Health and Medical Sciences, School of Population and Global Health<br>Christensen, Daniel; Telethon Kids Institute; The University of Western Australia<br>Pereira, G.F; Telethon Kids Institute; Curtin University, School of Public Health<br>Taylor, Catherine; Telethon Kids Institute; University of Western Australia, |
| Keywords:                     | EPIDEMIOLOGY, PAEDIATRICS, PUBLIC HEALTH                                                                                                                                                                                                                                                                                                                                                                                     |
|                               |                                                                                                                                                                                                                                                                                                                                                                                                                              |

SCHOLARONE™  
Manuscripts

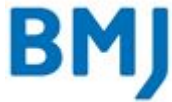

I, the Submitting Author has the right to grant and does grant on behalf of all authors of the Work (as defined in the below author licence), an exclusive licence and/or a non-exclusive licence for contributions from authors who are: i) UK Crown employees; ii) where BMJ has agreed a CC-BY licence shall apply, and/or iii) in accordance with the terms applicable for US Federal Government officers or employees acting as part of their official duties; on a worldwide, perpetual, irrevocable, royalty-free basis to BMJ Publishing Group Ltd ("BMJ") its licensees and where the relevant Journal is co-owned by BMJ to the co-owners of the Journal, to publish the Work in this journal and any other BMJ products and to exploit all rights, as set out in our [licence](#).

The Submitting Author accepts and understands that any supply made under these terms is made by BMJ to the Submitting Author unless you are acting as an employee on behalf of your employer or a postgraduate student of an affiliated institution which is paying any applicable article publishing charge ("APC") for Open Access articles. Where the Submitting Author wishes to make the Work available on an Open Access basis (and intends to pay the relevant APC), the terms of reuse of such Open Access shall be governed by a Creative Commons licence – details of these licences and which [Creative Commons](#) licence will apply to this Work are set out in our licence referred to above.

Other than as permitted in any relevant BMJ Author's Self Archiving Policies, I confirm this Work has not been accepted for publication elsewhere, is not being considered for publication elsewhere and does not duplicate material already published. I confirm all authors consent to publication of this Work and authorise the granting of this licence.

1  
2 1 **Manuscript**

3 2  
4 3 **Title:** The associations between biological and sociodemographic risks for developmental  
5 4 vulnerability in twins at age five: A population data linkage study in Western Australia.

6 5  
7 6 Gursimran K. Dhamrait,<sup>1,2</sup> Daniel Christensen,<sup>1,3</sup> Gavin Pereira<sup>1,4,5</sup> and Catherine L. Taylor.<sup>1,3</sup>

8 7  
9 8 <sup>1</sup>Telethon Kids Institute, Nedlands, Western Australia, Australia.

10 9 <sup>2</sup>School of Population and Global Health, The University of Western Australia, Nedlands, Western  
11 10 Australia, Australia.

12 11 <sup>3</sup>Centre for Child Health Research, The University of Western Australia, Nedlands, Western  
13 12 Australia, Australia.

14 13 <sup>4</sup>School of Public Health, Curtin University, Perth, Australia.

15 14 <sup>5</sup>Centre for Fertility and Health (CeFH), Norwegian Institute of Public Health, Oslo, Norway.

16 15  
17 16 **Address correspondence to:**

18 17 Gursimran K. Dhamrait

19 18 Telethon Kids Institute

20 19 15 Hospital Avenue, Nedlands, Western Australia, Australia.

21 20 Phone: 61+ 8 9489 1183

22 21 Fax: 61+ 8 9489 7700

23 22 Email: [gursimran.dhamrait@telethonkids.org.au](mailto:gursimran.dhamrait@telethonkids.org.au)

24 23  
25 24 **Main Body Word Count:** 3,955 words

26 25 **Abstract Word Count:** 293 words

27 26  
28 27 **Short Title:** Developmental vulnerability in twins at age five

29 28  
30 29 **Abbreviations**

31 30 AEDC: Australian Early Development Census

32 31 ARIA: Accessibility and Remoteness Index of Australia

33 32 AUSEI06: Australian Socioeconomic Index 2006

34 33 DV1: Developmentally Vulnerable on one or more Australian Early Development Census domains

35 34 DV2: Developmentally Vulnerable on two or more Australian Early Development Census domains

36 35 CI: Confidence Interval

1  
2 36 IRSD: Index of Relative Socioeconomic Disadvantage  
3  
4 37 MNS: Midwives Notifications System  
5  
6 38 OR: Odds Ratio  
7  
8 39 POBW: Proportion of Optimal Birthweight  
9  
10 40 WA: Western Australia  
11  
12 41

12 42 **Keywords (max of 5):**

13  
14 43 Twins, Australian Early Development Census, Child Development, Record Linkage.  
15  
16 44

17 45 **What is already known about this topic**

18 46 Twin pregnancies are classified as high risk pregnancies and associated with higher rates of  
19 47 pregnancy complications and adverse neonatal, perinatal and developmental outcomes, compared to  
20 48 singleton pregnancies.  
21  
22 49

25 50 **What this study adds**

26 51 Twins are more likely to be classified as developmentally vulnerable in their first year of full-time  
27 52 school than singletons.  
28  
29 53

30 54 Both biological and sociodemographic risk factors are associated with increased odds of  
31 55 developmental vulnerability for twins in their first year of full-time school.  
32  
33  
34  
35  
36  
37  
38  
39  
40  
41  
42  
43  
44  
45  
46  
47  
48  
49  
50  
51  
52  
53  
54  
55  
56  
57  
58  
59  
60

**Abstract**

Objective: To investigate the associations between prenatal and perinatal risk factors and developmental vulnerability in twins at age five.

Design: Retrospective cohort study using bivariate and multivariate logistic regression to identify associations between risk factors and developmental vulnerability.

Setting: Western Australia (WA), 2002-2015.

Participants: 828 twin pairs born in WA with an Australian Early Development Census (AEDC) record from 2009, 2012 or 2015.

Main Outcome Measures: The AEDC is a national measure of child development across five domains. Children with scores <10th percentile were classified as developmentally vulnerable (DV1 for one or more domains, DV2 for two or more domains).

Results: In this population, 431 (26.0%) twins were classified as DV1 and 223 (14.1%) as DV2. In the multivariable model, risk factors for DV1 were; maternal age (<20 years; OR 8.69, 95% CI 1.52 to 49.69), language other than English spoken at home by the child (OR 5.25, 95% CI 1.77 to 15.56), male child (OR 5.25, 95% CI: 2.99 to 9.24), age younger than the reference category for the study sample ( $\geq 5$  years one month to <5 years 10 months) at time of AEDC completion (at time of AEDC completion (OR 3.10, 95% CI: 1.44 to 6.69), and having a proportion of optimal birthweight (POBW) less than the 15<sup>th</sup> centile (OR 2.04, 95% CI 1.05 to 3.97). Risk factors for DV2 were; male child (OR 7.98, 95% CI: 3.49 to 6.67), age younger than the reference category (OR 4.89, 95% CI: 1.77 to 13.48), an unmarried maternal marital status (OR 4.43, 95% CI: 1.08 to 18.25), and having a POBW <15<sup>th</sup> of the study sample (OR 3.30, 95% CI: 1.33 to 8.21).

Conclusion: Both biological and sociodemographic risk factors are associated with developmental vulnerability in twins at five years of age.

1  
2 79 **Article Summary**

3  
4 80 **Strengths and Limitations**

5  
6 81 **Limitations:**

- 7  
8  
9 82 • Datasets did not include data on twin zygosity nor complications of pregnancy that are  
10  
11 83 specific to multiple pregnancies (e.g., twin reversed arterial perfusion, twin-twin transfusion  
12  
13 84 syndrome). However, complications of multiple gestations are captured in the ‘other  
14  
15  
16 85 complications of pregnancy’ variable used in this study.

17  
18 86 **Strengths:**

- 19  
20 87 • This is the first study of this scale (population-level sample of twins; N>1,600) to assess  
21  
22 88 developmental vulnerabilities in an otherwise healthy sample of Australian twins, at the  
23  
24  
25 89 time of their first year of full-time school.
- 26  
27 90 • The use of population-based cohort design; the use of complete twin pairs for analysis; and  
28  
29  
30 91 use of a population-based estimate of optimal fetal growth and twins who did not have  
31  
32 92 developmental disabilities.
- 33  
34  
35  
36  
37  
38  
39  
40  
41  
42  
43  
44  
45  
46  
47  
48  
49  
50  
51  
52  
53  
54  
55  
56  
57  
58  
59  
60

## 93 Introduction

94 The increased use of assisted reproductive technologies and increasing maternal age at conception  
95 have attributed to a significant increase in the number of multifetal pregnancies around the world.<sup>1</sup>  
96 Multifetal pregnancies are classified as high risk pregnancies and are associated with higher rates of  
97 pregnancy complications and adverse neonatal and perinatal outcomes, compared to singleton  
98 pregnancies.<sup>2-6</sup> The majority of the literature assessing higher order pregnancies has focused  
99 primarily on birth outcomes, including preterm birth,<sup>7</sup> low birth weight,<sup>3</sup> and developmental  
100 disabilities such as cerebral palsy.<sup>8</sup> Studies that have assessed longer-term developmental outcomes  
101 of twins have focused on developmental outcomes around the age of two years.<sup>9</sup> Such studies have  
102 reported that that twins had poorer performance, in comparison to singletons, on a range of domains  
103 including; communication, gross and fine motor skills, problem solving, personal-social skills, and  
104 language development.<sup>10,11</sup> Furthermore, most studies examining child development outcomes at  
105 school starting age have focused on singleton children, from a single family and have compared  
106 children across families.<sup>12</sup> There is a paucity of research on the developmental vulnerability of  
107 multifetal pregnancies such as twins, around the time that they commence formal education.  
108 Child development outcomes can vary significantly based on numerous factors including the child's  
109 personal characteristics, such as personal dispositions and abilities, social constructs and the  
110 environments, both intrauterine and extrauterine, in which they develop.<sup>13-16</sup> Twin studies, aiming  
111 to assess the association between genes and the environment have supported the notion that both  
112 genes and the environment can impact child development.<sup>17-20</sup> Yet, a number of studies have  
113 reported no significant differences in child development outcomes based on zygosity.<sup>21-23</sup> Twins are  
114 however, more likely to be classified as preterm<sup>24</sup> or low birth weight, and have fetal growth  
115 restriction.<sup>25</sup> Studies that have assessed cognitive and school performance outcomes at the age of  
116 five have reported that children who are born preterm,<sup>26-33</sup> with a low birth weight,<sup>34-37</sup> are small for  
117 gestational age,<sup>38,39</sup> and male<sup>40-43</sup> are more likely to have poorer developmental outcomes. Given the  
118 higher rates of pregnancy neonatal and perinatal adversities observed in twins in comparison to



1  
2 119 singletons, twins are particularly at risk for developmental delays in the early childhood period. A  
3  
4 120 study reported that twins scored lower than singletons in both the Verbal and Performance IQ  
5  
6 121 domains of the Wechsler Preschool and Primary Scale of Intelligence, at the ages of four and five  
7  
8  
9 122 years.<sup>22</sup> Likewise, twin studies have also reported sex differences, with girls scoring higher than  
10  
11 123 boys at ages four and five years.<sup>22</sup> Studies have reported that twins are more likely to have poorer  
12  
13 124 neurodevelopmental outcomes compared to singletons, even after controlling for gestational age  
14  
15  
16 125 and birthweight.<sup>44</sup>  
17  
18 126 Furthermore, sociodemographic factors such as low socioeconomic status and low levels of parental  
19  
20 127 education, have also been identified to adversely impact child development outcomes.<sup>45-47</sup> Results  
21  
22  
23 128 from twin studies assessing the impact of sociodemographic factors on development outcomes in  
24  
25 129 twins have been mixed. A study of a twin sample from the Quebec Newborn Twin Study reported  
26  
27 130 that the environmental factors shared by twins of the same family, were more significantly  
28  
29  
30 131 associated with early language skills and school readiness in twins at the age of five years, in  
31  
32 132 comparison to genetic factors.<sup>21</sup> Whilst another study reported that poorer early cognitive and non-  
33  
34 133 cognitive development of twins, at the ages of; 6, 12 and 18 months, was associated with biological  
35  
36 134 factors including low birth weight, independently of environmental factors, such as socioeconomic  
37  
38  
39 135 status.<sup>3</sup> Studies assessing both biological and sociodemographic factors and their impact on the  
40  
41 136 longer-term child development of children born from multiple pregnancies remain sparse and the  
42  
43 137 results of the existing studies are mixed.

44  
45  
46 138 The aim of this study was to examine the association between biological and sociodemographic risk  
47  
48 139 factors and developmental vulnerability in twins in their first year of full-time school.

## 50 140 **Methods**

### 52 141 **Data Sources and Study Population**

#### 54 142 **Data Sources**

55 143 This study used anonymised unit records from the Department of Health WA. Australian Early  
56  
57 144 Development Census (AEDC) records were obtained for all available years (2009, 2012 and 2015).

1  
2 145 Perinatal and birth related data were obtained for children born in WA from the Midwives  
3  
4 146 Notification System (MNS), which is statutory record of all births (still- or live-born) in WA with  
5  
6 147 either a birthweight >400 grams or a final gestational length of  $\geq 20$  weeks. Variables from MNS  
8  
9 148 were cross validated with corresponding records from WA Birth Registrations. WA Register for  
10  
11 149 Developmental Anomalies (WARDA) records were used to identify children who had a diagnosed  
12  
13 150 developmental disability between birth and age five years.

### 16 151 **Study Population**

17  
18 152 The study population included all children born in WA with an AEDC record in either 2009, 2012  
19  
20 153 or 2015 (N=73,903). Children were excluded from the study if; 1) they were not from a twin birth  
22  
23 154 (N=71,748), 2) they were identified by their teacher as having 'special-needs' based on a diagnosed  
24  
25 155 physical and/or intellectual disability (N=123), 3) they were reported as having any birth defect in  
26  
27 156 the WARDA datasets (N=119), 4) they had an AEDC score that was either incomplete or missing  
28  
29  
30 157 (N=22), or 5) their twin sibling was excluded based on the aforementioned exclusion criteria  
31  
32 158 (N=235; Figure 1). The final study sample consisted of N=1,656 children; N=828 twin pairs. There  
33  
34 159 were 252 opposite sex twin pairs and 576 same sex twin pairs (277 male and 299 female twin  
35  
36 160 pairs).

### 39 161 **Outcome Measure**

40  
41 162 The AEDC is a national census of early childhood development spanning five developmental  
42  
43 163 domains; 1) Physical Health and Wellbeing, 2) Social Competence, 3) Emotional Maturity, 4)  
45  
46 164 Language and Cognitive skills (school-based), and 5) Communication Skills and General  
47  
48 165 Knowledge. The AEDC is conducted every three years, with the first national data collection  
49  
50 166 conducted in 2009. Children with scores <10<sup>th</sup> percentile in a given domain are classified as  
52  
53 167 'developmentally vulnerable.' AEDC cut-off scores are based on the first national AEDC data  
54  
55 168 collection in 2009 and apply to all AEDC data collections. Domain scores for children with special  
56  
57 169 needs are not included in the AEDC results. Two outcomes measures were used; developmentally  
58  
59  
60

1  
2 170 vulnerable one or more AEDC domains (DV1) and developmentally vulnerable two or more AEDC  
3  
4 171 domains (DV2).

## 6 172 **Risk Variables**

### 8 9 173 **Maternal Variables**

10  
11 174 Maternal age and marital status at child's birth were obtained from the MNS and Birth  
12  
13 175 Registrations. Maternal occupation at birth was obtained from Birth Registrations data and  
14  
15  
16 176 converted to a four-digit standard code using the Australian and New Zealand Standard  
17  
18 177 Classification of Occupations. These codes were then assigned a value ranging from 0-100 using  
19  
20 178 the Australian Socioeconomic Index 2006 (AUSEI06).<sup>48</sup> Low AUSEI06 values are representative of  
21  
22  
23 179 low-status occupations and high values represent high-status occupations. The distribution of values  
24  
25 180 of AUSEI06 were then divided into five groups; [0,20], (20, 40], (40, 60], (60,80] and (80,100]. An  
26  
27 181 AUSEI06 value of zero were assigned to records if occupation was reported as 'unemployed', 'stay  
28  
29  
30 182 at home parent' or 'pensioner.' For records where maternal occupation was not stated, an AUSEI06  
31  
32 183 value was not assigned and these cases were reported as missing.

### 34 184 **Pregnancy and Birth Variables**

35  
36 185 We included several binary pregnancy and birth variables to indicate either the presence or absence;  
37  
38  
39 186 of fertility treatments, smoking during pregnancy, pre-eclampsia, gestational diabetes, threatened  
40  
41 187 abortion, threatened pre-term labour, antepartum haemorrhage (APH), placenta praevia, placental  
42  
43 188 abruption, fetal distress, cephalopelvic disproportion, prolapsed cord, precipitate delivery, post-  
44  
45  
46 189 partum haemorrhage (PPH), intubation status, early preterm birth (<34 weeks of gestational age),  
47  
48 190 and time to Spontaneous Respiration (TSR); with a TSR of  $\geq 2$  minutes forming the 'at risk' group  
49  
50  
51 191 and five-minute Apgar score; with a five-minute Apgar score of  $< 7$  forming the 'at risk' group.

52  
53 192 The proportion of optimal birthweight (POBW) is a measure of fetal growth and is defined as birth  
54  
55 193 weight divided by expected birth weight, in the absence of pathologic risk factors. This measure  
56  
57 194 also accounts for non-pathologic determinants of growth, including gestational age, birth order, sex  
58  
59  
60 195 of the child and maternal height<sup>49</sup> and has been validated against ultrasound measurements.<sup>50</sup> We

1  
2 196 derived a binary proxy for fetal growth restriction as POBW <15<sup>th</sup> centile, which corresponded to  
3  
4 197 an observed birth weight less than 75.75% of that expected.<sup>9</sup>  
5

6 198 We derived a general category for other pregnancy related complications (not elsewhere stated;  
7  
8  
9 199 such as urinary tract infection, pre-labour rupture of membranes) for all records. As records may  
10  
11 200 have multiple pregnancy related complications, all records that had a complication that was not  
12  
13 201 elsewhere stated in this study or had multiple complications of which at least one complication was  
14  
15  
16 202 not elsewhere stated in this study, formed the 'at risk' group for this variable.  
17

### 18 203 **Child Variables**

19  
20 204 Sex and ethnicity of child was obtained from the MNS and Birth Registrations. Age at the time of  
21  
22  
23 205 AEDC completion and language other than English spoken at home were obtained from the AEDC.  
24  
25 206 Age of children at the time of AEDC completion ranged between;  $\geq 3$  years 10 months to <6 years  
26  
27 207 10 months, with a mean of age category of,  $\geq 5$  years one month to 5 years 10 months. To balance  
28  
29  
30 208 frequencies, the age of children at the time of AEDC completion was categorised into three groups;  
31  
32 209 1)  $\geq 3$  years 10 months to <5 years and one month, 2)  $\geq 5$  years one month to <5 years 10 months  
33  
34  
35 210 (reference category) and 3)  $\geq 5$  years 10 months to <6 years 10 months.  
36

37 211 The total number of siblings were derived as the number of live births to each mother prior to the  
38  
39 212 year that the cohort child had the AEDC conducted. Siblings from the twin pregnancy and siblings  
40  
41  
42 213 who died within the neonatal period (i.e. mode of separation post-birth from the hospital was death)  
43  
44 214 were excluded in the calculations for total number of siblings.  
45

### 46 215 **Sociodemographic Variables**

47  
48  
49 216 The Index of Relative Socioeconomic Disadvantage (IRSD)<sup>19</sup> was calculated using the residential  
50  
51 217 address at the time of birth. IRSD is derived from Australian Census data and reflects area-level  
52  
53 218 disadvantage through variables such as low household income, low educational attainment and high  
54  
55 219 levels of unemployment. Geographical areas are given a score from 1 (most disadvantaged) to 5  
56  
57  
58 220 (most advantaged). Due to smaller cohort numbers in the more disadvantaged areas, these five  
59  
60

1  
2 221 variables were collapsed into two groups; most disadvantaged quintile (i.e. ISRD quintile 1) and  
3  
4 222 greater than the most disadvantaged quintile (i.e. ISRD quintiles 2-5).  
5

## 6 223 **Statistical Modelling**

8  
9 224 For each risk variable, the 'least risk' category (e.g. not early preterm birth) was used as the  
10  
11 225 reference category (Table 1). To estimate the risk of a child being classified as DV1 and DV2, a  
12  
13 226 generalised linear mixed model with a logit link function was used with a random intercept for each  
14  
15 227 twin pair. A total of 30 maternal, pregnancy, birth, child and sociodemographic risk variables were  
16  
17 228 considered for the multivariate models. For DV1, DV2, and each of the five AEDC domains, 24  
18  
19 229 risk variables were included in the multivariate models; six risk variables were excluded from  
20  
21 230 multivariable analysis due to the prevalence being too small (total N<40 for a given category). The  
22  
23 231 variables excluded were; 1) placenta praevia, 2) placental abruption, 3) cephalopelvic disproportion,  
24  
25 232 4) prolapsed cord, 5) precipitate delivery and 6) a five-minute Apgar score of <7. Odds ratios (OR)  
26  
27 233 and the associated 95% confidence intervals (CIs) were estimated for both unadjusted and adjusted  
28  
29 234 models. All analyses were undertaken using PROC GLIMMIX in SAS version 9.4 for Windows.<sup>51</sup>  
30  
31  
32  
33

## 34 235 **Results**

### 36 236 **Prevalence of developmental vulnerability in twins**

38  
39 237 A total of 431 (26.0%) twins were classified as DV1 (Table 1). Of the 28 maternal, pregnancy and  
40  
41 238 birth, child and sociodemographic risk variables considered in the multivariate models, five  
42  
43 239 variables had a statistically significant association with an increased risk of a twin being classified  
44  
45 240 as DV1. In order of decreasing magnitude of associated risk, the ORs were; maternal age of 20  
46  
47 241 years or younger at time of twins' birth (OR 8.69, 95% CI 1.52 to 49.69), child speaks language  
48  
49 242 other than English at home (OR 5.25, 95% CI 1.77 to 15.56), male twins (OR 5.25, 95% CI: 2.99 to  
50  
51 243 9.24), child age younger than the reference category for the study sample ( $\geq 5$  years one month to 5  
52  
53 244 years 7 months) at time of AEDC completion (OR 3.10, 95% CI: 1.44 to 6.69), and POBW <15<sup>th</sup>  
54  
55 245 percentile (OR 2.04, 95% CI 1.05 to 3.97).  
56  
57  
58  
59  
60

1  
2 246 A total of 223 (14.1%) twins were classified as DV2 (Table 2). Of the 24 maternal, pregnancy and  
3  
4 247 birth, child and sociodemographic risk variables considered in the adjusted models, four variables  
5  
6 248 had a statistically significant association with an increased risk of a twin being classified as DV2.  
7  
8  
9 249 Risk factors for DV2 were, in order of decreasing magnitude; male twins (OR 7.98, 95% CI 3.49 to  
10  
11 250 8.25), child age younger than the reference category at time of AEDC completion (OR 4.89, 95%  
12  
13 251 CI: 1.77 to 13.48), unmarried maternal marital status (OR 4.43, 95% CI 1.08 to 18.25), and POBW  
14  
15  
16 252 <15<sup>th</sup> percentile (OR 3.30, 95% CI 1.33 to 8.21).

### 18 253 **Associations with domain-specific developmental vulnerability**

19  
20 254 A total of, 188 (11.4%) children were classified as developmentally vulnerable for the domains of:  
21  
22  
23 255 Physical Health and Wellbeing; 151 (9.1%) for Social Competence; 147 (8.9%) for Emotional  
24  
25 256 Maturity; 195 (11.8%) for Language and Cognitive Skills (school-based); and 200 (12.0%) for  
26  
27 257 Communication Skills and General Knowledge (Supplementary Tables 1-5, respectively). These  
28  
29  
30 258 results were broadly consistent with the findings for the aggregate measures of developmental  
31  
32 259 vulnerability (DV1 and DV2).

### 34 260 **Discussion**

35  
36 261 This study examined the associations between biological and sociodemographic risk factors and  
37  
38  
39 262 developmental vulnerability in twins in their first year of full-time school. To our knowledge, our  
40  
41 263 study is the first of this scale (population-level sample of twins; N>1,600) to report an elevated  
42  
43 264 prevalence of developmental vulnerabilities, in comparison to singletons, in an otherwise healthy  
44  
45  
46 265 sample twins, at the time of their first year of full-time school. We found that the percentage of  
47  
48 266 twins classified as developmentally vulnerable was higher than the percentage of children classified  
49  
50 267 as developmentally vulnerable in the WA general population. In the WA twin population, 26.0% of  
51  
52  
53 268 twins were classified as DV1 and 14.1% as DV2 across the 2009, 2012 and 2015 AEDC cycles. In  
54  
55 269 the general WA population, which includes twins and higher order multiples, 23.0% of children  
56  
57 270 were classified as DV1 and 11.3% of children were classified as DV2, across these AEDC cycles.<sup>52</sup>  
58  
59  
60 271 A large cohort study of 99,530 singleton children from New South Wales reported that 20.8% were

1  
2 272 classified as DV1 across the 2009 and 2012 AEDC cycles.<sup>53</sup> Thus, we found that twins are at an  
3  
4 273 elevated risk of developmental vulnerability relative to a general population of children in the state  
5  
6 274 of Western Australia and in a singleton population in New South Wales. This is consistent with  
7  
8  
9 275 findings from a study of 142 twin pairs from the Louisville Twin Study, that reported twins scored  
10  
11 276 lower than singletons in both the Verbal and Performance IQ domains of the Wechsler Preschool  
12  
13 277 and Primary Scale of Intelligence at both four and five years of age.<sup>22</sup> As our results were obtained  
14  
15  
16 278 from a sample of twins without any diagnosed developmental disabilities, the higher prevalence  
17  
18 279 rates of twins being classified as DV1 and DV2 observed in our study, when compared to the  
19  
20 280 general Australian population, suggests that healthy twins are more likely to be classified as  
21  
22  
23 281 developmentally vulnerable on AEDC domains at school starting age when compared to their  
24  
25 282 singleton counterparts.

26  
27 283 The biological factors associated with developmental vulnerability in twins were; male sex, fetal  
28  
29  
30 284 growth restriction, and younger chronological age at the time of AEDC completion. These results  
31  
32 285 are in line with singleton studies<sup>40,54</sup> which have reported that male children are more likely to be  
33  
34 286 classified as developmentally vulnerable in their first year of full-time school, in comparison to  
35  
36 287 female children. A study conducted in South Australia of 13,827 children, of which 3.4% were  
37  
38  
39 288 twins, also reported that male twins were more likely to be classified as DV2, when compared to  
40  
41 289 female twins, however this finding was not statistically significant.<sup>55</sup> The Louisville Twin Study  
42  
43 290 also reported sex differences, with females scoring higher than males at ages four and five years,  
44  
45  
46 291 however, scores tended to converge at six years of age.<sup>22</sup>

47  
48 292 We also reported that twins younger than the reference category for this sample were more likely to  
49  
50 293 be classified as developmentally vulnerable in their first year of full-time school. A study of 840  
51  
52 294 Canadian five-year old twins, aiming to assess the genetic and environmental factors influencing  
53  
54  
55 295 school readiness, reported that in the preliminary models age was positively correlated with the  
56  
57 296 spatial recognition, numbers, and the letters components of the Lollipop test.<sup>56</sup> Furthermore, a  
58  
59 297 recent discussion paper identified the need for further research into assess the effects of delaying  
60



1  
2 298 school entry for twins<sup>57</sup> thus, highlighting that further research is required to better elucidate if  
3  
4 299 delaying school entry is beneficial for both short-term and long-term academic outcomes in twins.  
5  
6 300 The sociodemographic risk factors associated with developmental vulnerability in twins included  
7  
8 301 maternal age and unmarried marital status at the time of twins' birth, the child speaking a language  
9  
10 other than English, and age at the time of AEDC completion. These results are supported by the  
11 302  
12 South Australian study, that examined a range of variables also included in our study.<sup>55</sup> This study  
13 303  
14 reported that maternal age and marital status were associated with an increased risk of children  
15 304  
16 being classified as DV2 on the AEDC.<sup>55</sup> Furthermore, the South Australian study reported that  
17 305  
18 maternal and paternal occupation, parity and smoking during pregnancy were also associated with  
19 306  
20 an increased risk of children being classified as DV2.<sup>55</sup> In our study we observed an increased but  
21 307  
22 insignificant association between these risk variables and twins being classified as either DV1 or  
23 308  
24 DV2.  
25 309  
26  
27 310 An interesting finding from our study was that speaking a language other than English at home was  
28  
29 associated with an increased risk for twins being classified as DV1. Previous studies have reported  
30 311  
31 that approximately a fifth of Australian children are bilingual,<sup>58</sup> and the prevalence of twins  
32 312  
33 speaking a language other than English at home in our study were in line with these results. Results  
34 313  
35 from a study of an Australia wide study of 261,147 children, singletons and multiples, from the  
36 314  
37 2009 AEDC cycle reported that bilingual children proficient in English have been reported to had  
38  
39 equal or slightly lower odds of being classed as DV1 when compared to their English-speaking  
40 315  
41 background peers.<sup>58</sup> However, unlike our study, this study<sup>58</sup> did not report differences in  
42 316  
43 developmental vulnerability based on plurality. Additionally, a Canadian study examining the  
44 317  
45 school readiness profiles of 95,537 children in British Columbia<sup>59</sup> reported that bilingualism was  
46 318  
47 associated with positive social, emotional and cognitive development, as measured by the Early  
48 319  
49 Development Index.<sup>43</sup> Differences in results may be attributed to the fact bilingualism may be a risk  
50 320  
51 factor for twins however, it may not be a significant risk factor in a general population sample.  
52 321  
53 Furthermore, differences in the prevalence rates of particular language groups in WA is likely to be  
54 322  
55  
56  
57  
58  
59  
60



1  
2 324 different to those that are prevalent in British Columbia and the difference in findings between the  
3  
4 325 Canadian study and our results may be attributable to this fact.  
5  
6 326 Our findings have some accord with a cohort study examining the associations between biological  
7  
8  
9 327 and sociodemographic risk factors on late language emergence in 473 twins pairs at the age of two  
10  
11 328 years.<sup>9</sup> Taylor et al. reported that the risk factors for late language emergence in twins, without  
12  
13 329 developmental disabilities, include fetal growth restriction.<sup>9</sup> Interestingly, our study also identified  
14  
15 330 fetal growth restriction as a risk factor for developmental vulnerability at age five, suggesting that  
16  
17  
18 331 the biological implications of a suboptimal intrauterine environment may be persist beyond infancy  
19  
20 332 and into early childhood in twins who did not have diagnosed developmental disabilities. In contrast  
21  
22  
23 333 to our study, the Taylor et al. twin sample excluded twins with exposure to languages other than  
24  
25 334 English. Their study found that sociodemographic risk factors (low maternal education,  
26  
27 335 socioeconomic area disadvantage) were not associated with late language emergence at age two  
28  
29  
30 336 years. A subsequent study of the twins at ages four years and six years reported that higher maternal  
31  
32 337 education and older maternal age showed positive effects on language and non-verbal phenotypes.<sup>6</sup>  
33  
34 338 Our results suggest that sociodemographic factors including, maternal age and marital status at time  
35  
36 339 of twins' birth, and the child speaking a language other than English at home are also associated  
37  
38  
39 340 with an increased risk of developmental vulnerability at age five.<sup>9</sup> The differences in findings  
40  
41 341 between this study and our study suggest that sociodemographic characteristics may play a more  
42  
43 342 significant role as risk variables at age five years compared to at the age of two years. This notion is  
44  
45  
46 343 supported by a study of a twin sample from the Quebec Newborn Twin Study, which reported that  
47  
48 344 environmental factors, such as socioeconomic status, rather than genetic factors were attributable to  
49  
50 345 the predictive association observed between early language skills and school readiness, as measured  
51  
52  
53 346 by the Lollipop Test, in twins 63-months of age.<sup>21</sup> However, further research is required to better  
54  
55 347 elucidate the impact and interplay of biological and sociodemographic risk variables at different  
56  
57 348 stages of development in twins.  
58  
59  
60

1  
2 349 Studies assessing twin-singleton differences often control for or select for factors such as  
3  
4 350 prematurity, low birth weight, or parental socioeconomic status our study draws attention to adverse  
5  
6 351 effect of risk factors such as POBW and maternal marital status on child development outcomes at  
7  
8  
9 352 age five.<sup>54,60,61</sup> An Australian cohort study of 1,922 children from the Northern Territory using  
10  
11 353 linked administrative data, reported an increased, but non-significant, risk of twins being classified  
12  
13 354 as DV1 on the AEDC, after controlling for a range of biological and sociodemographic variables  
14  
15  
16 355 used in our study including; sex, 5-minute Apgar score <7, area remoteness, ethnicity, child speaks  
17  
18 356 a language other than English at home and maternal age at time of child's birth.<sup>54</sup> Although this  
19  
20 357 study gave consideration to plurality as a risk factor for developmental vulnerability, it did not aim  
21  
22  
23 358 to assess the association between a comprehensive set of biological and sociodemographic risk  
24  
25 359 factors. A Canadian study of 5-year old twins reported that shared environmental factors  
26  
27 360 substantially accounted for cognitive school readiness (as measured by the Lollipop Test) as  
28  
29  
30 361 compared to genetic effects.<sup>56</sup> Likewise other studies have also reported that a range of family  
31  
32 362 factors, which would be assumed to be shared by both twins, such as family income, maternal  
33  
34 363 occupation, and employment status are associated with cognitive school readiness.<sup>62,63</sup> Further  
35  
36 364 studies in this area are required as the extent and nature of the risk factors associated with  
37  
38  
39 365 developmental vulnerability at age five in twins remain not well-established.  
40  
41 366 Preventative intervention studies have reported that programs designed to improve school readiness  
42  
43 367 and high quality early childhood education and care, are effective for at-risk populations and can  
44  
45  
46 368 have significant long-term results.<sup>64,65</sup> The higher prevalence rates of DV1 and DV2 in twins  
47  
48 369 observed in this study are indicative of the fact that twins form an at-risk group in terms of  
49  
50 370 developmental vulnerability at the time at which children commence full-time school. Therefore, it  
51  
52  
53 371 is pertinent for those working in the early childhood education sector and for parents to be aware of  
54  
55 372 the developmental vulnerabilities present in twins at the age at which children begin full-time  
56  
57 373 school. In Australia, there has been call to provide increased quantity and quality of support service  
58  
59  
60

1  
2 374 and resources are required for twins and their families due to increased vulnerability<sup>57</sup> and the  
3  
4 375 results of our study highlight this need.  
5

6 376 **Conclusions**  
7

8  
9 377 Both biological and sociodemographic risk factors are associated with developmental vulnerability  
10  
11 378 at the age of five. In particular, the results draw attention to the notion that prenatal and more  
12  
13 379 significantly perinatal risk factors and sociodemographic environments in which twins are raised  
14  
15  
16 380 can impact developmental levels in early childhood.  
17  
18  
19  
20  
21  
22  
23  
24  
25  
26  
27  
28  
29  
30  
31  
32  
33  
34  
35  
36  
37  
38  
39  
40  
41  
42  
43  
44  
45  
46  
47  
48  
49  
50  
51  
52  
53  
54  
55  
56  
57  
58  
59  
60

For peer review only

1  
2 381 **Acknowledgements:**  
3

4 382 We gratefully acknowledge the WA Data Linkage Branch and the data custodians who provided  
5  
6 383 data for this study and the people of Western Australia for the use of their administrative data. This  
7  
8  
9 384 study does not necessarily reflect their views. This study uses data from the Australian Early  
10  
11 385 Development Census (AEDC). The AEDC is funded by the Australian Government Department of  
12  
13 386 Education and Training. The findings and views reported are those of the authors and should not be  
14  
15  
16 387 attributed to the Department or the Australian Government.  
17

18 388 **Patient and Public Involvement:**  
19

20 389 No patients were involved in the development of the research question or the outcome measures, or  
21  
22  
23 390 in the development of the plans for the design or implementation of the study.  
24

25 391 **Ethics Approval:**  
26

27 392 Ethics approval for this study was granted by the Western Australian Department of Health Human  
28  
29  
30 393 Research Ethics Committee (2016/51) and the University of Western Australia Human Research  
31  
32 394 Ethics Committee (RA/4/20/4776).  
33

34 395 **Declaration of interests:**  
35

36 396 The authors declare that they have no competing interests, no financial relationships with any  
37  
38  
39 397 organisations that might have an interest in the submitted work in the previous three years; no other  
40  
41 398 relationships or activities that could appear to have influenced the submitted work.  
42

43 399 **Funding:**  
44

45 400 This study was supported by National Health and Medical Research Grants (GNT1173991 and  
46  
47  
48 401 GNT1099655 to GP), the Research Council of Norway through its Centres of Excellence funding  
49  
50 402 scheme (#262700 to GP) and the Australian Research Council Centre of Excellence for Children  
51  
52  
53 403 and Families over the Life Course (CE140100027 to CLT and DC). GKD was supported by the  
54  
55 404 ARC Centre of Excellence for Children and Families over the Life Course Scholarship, the ARC  
56  
57 405 Centre of Excellence for Children and Families over the Life Course Top-Up Scholarship and the  
58  
59 406 Stan and Jean Perron Top-Up Scholarship.  
60

1  
2 407 **Author Contributions:**

3  
4 408 All authors contributed to study inception, design, interpretation of the results and writing of the  
5  
6 409 paper and manuscript revisions. GKD did the literature review, data analysis and wrote the first  
7  
8  
9 410 draft of the paper. All authors contributed to the interpretation of the results and writing of the paper  
10  
11 411 and all authors approved the final manuscript.

12  
13 412 **Data Sharing:**

14  
15  
16 413 The linked administrative data are owned by the government departments who approved the linkage  
17  
18 414 and use of the data for this study. Use of the study data is restricted to named researchers. The current  
19  
20 415 Human Research Ethics Committee approvals were obtained for public sharing and presentation of  
21  
22  
23 416 data on group level only, meaning the data used in this study cannot be shared by the authors.  
24  
25 417 Collaborative research may be conducted according to the ethical requirements and relevant privacy  
26  
27 418 legislations. Potential collaborators should contact author GP with their expression of interest. The  
28  
29  
30 419 steps involved in seeking permission for linkage and use of the data used in this study are the same  
31  
32 420 for all researchers.

33  
34  
35  
36  
37  
38  
39  
40  
41  
42  
43  
44  
45  
46  
47  
48  
49  
50  
51  
52  
53  
54  
55  
56  
57  
58  
59  
60

## References

1. Umstad MP, Gronow MJ. Multiple pregnancy: a modern epidemic? *Medical journal of Australia*. 2003;178(12):613-615.
2. Marlow N, Roberts BL, Cooke RW. Motor skills in extremely low birthweight children at the age of 6 years. *Arch Dis Child*. 1989 Jun;64(6):839-47.
3. Riese M. Risk and early development: Findings from the Louisville Twin Study. In: Blickstein I, Keith LG, editors. *Multiple Pregnancy: Epidemiology, Gestation, and Perinatal Outcome*. 2 ed: CRC Press; 2005.
4. Australian Bureau of Statistics. *Births* Canberra; 2015. Available from: <http://www.abs.gov.au/AUSSTATS/abs@.nsf/Previousproducts/3301.0Main%20Features32015?op=endocument&tabname=Summary&prodno=3301.0&issue=2015&num=&view=>
5. Australian Institute of Health and Welfare. *Perinatal deaths in Australia 2013–2014*. Canberra; 2018.
6. Rice ML, Zubrick SR, Taylor CL, Hoffman L, Gayán J. Longitudinal Study of Language and Speech of Twins at 4 and 6 Years: Twinning Effects Decrease, Zygosity Effects Disappear, and Heritability Increases. *Journal of speech, language, and hearing research : JSLHR*. 2018;61(1):79-93. Available from: PubMed
7. Fuchs F, Senat MV. Multiple gestations and preterm birth. *Seminars in fetal & neonatal medicine*. 2016;21(2):113-120. Available from: PubMed
8. Yokoyama Y, Shimizu T, Hayakawa K. Prevalence of cerebral palsy in twins, triplets and quadruplets. *International journal of epidemiology*. 1995;24(5):943-948. Available from: PubMed
9. Taylor CL, Rice ML, Christensen D, Blair E, Zubrick SR. Prenatal and perinatal risks for late language emergence in a population-level sample of twins at age 2. *BMC Pediatr*. 2018 Feb 7;18(1):41.
10. Taylor C, Zubrick S, Christensen D. Multiple risk exposures for reading achievement in childhood and adolescence. *Journal of Epidemiology and Community Health*. 2019;jech-2018-211323.

- 1  
2 448 11. Nan C, Piek J, Warner C, Mellers D, Krone RE, Barrett T, et al. Trajectories and predictors of  
3  
4 449 developmental skills in healthy twins up to 24 months of age. *Infant Behav Dev.* 2013 Dec;36(4):670-  
5  
6 450 8.  
7  
8 451 12. DiLalla LF. Social Development of Twins. *Twin Research and Human Genetics.* 2006;9(1):95-  
9  
10 452 102. Available from: Cambridge Core  
11  
12  
13 453 13. U. Bronfenbrenner. *Making Human Beings Human: Bioecological Perspectives on Human*  
14 454 *Development.* Thousand Oaks, California Sage Publications, Inc.; 2005.  
15  
16  
17 455 14. Fox SE, Levitt P, Nelson CA, 3rd. How the timing and quality of early experiences influence the  
18  
19 456 development of brain architecture. *Child Dev.* 2010 Jan-Feb;81(1):28-40.  
20  
21  
22 457 15. Barker DJ. The developmental origins of adult disease. *J Am Coll Nutr.* 2004 Dec;23(6  
23 458 Suppl):588s-595s.  
24  
25  
26 459 16. Bradley RH, Corwyn RF. Socioeconomic status and child development. *Annu Rev Psychol.*  
27  
28 460 2002;53:371-99.  
29  
30  
31 461 17. Friend A, DeFries JC, Olson RK, Pennington B, Harlaar N, Byrne B, et al. Heritability of high  
32 462 reading ability and its interaction with parental education. *Behavior genetics.* 2009;39(4):427-436.  
33  
34  
35 463 18. Harden KP, Turkheimer E, Loehlin JC. Genotype by environment interaction in adolescents'  
36  
37 464 cognitive aptitude. *Behavior genetics.* 2007;37(2):273-283.  
38  
39  
40 465 19. Turkheimer E, Haley A, Waldron M, d'Onofrio B, Gottesman II. Socioeconomic status modifies  
41 466 heritability of IQ in young children. *Psychological science.* 2003;14(6):623-628.  
42  
43  
44 467 20. Rowe DC, Jacobson KC, Van den Oord EJ. Genetic and environmental influences on vocabulary  
45  
46 468 IQ: Parental education level as moderator. *Child development.* 1999;70(5):1151-1162.  
47  
48  
49 469 21. Forget-Dubois N, Dionne G, Lemelin J, Perusse D, Tremblay R, Boivin M. Early child language  
50 470 mediates the relation between home environment and school readiness. *Child Dev.* 2009 May-  
51  
52 471 Jun;80(3):736-49.  
53  
54  
55 472 22. Wilson RS. Twins: Patterns of cognitive development as measured on the Wechsler Preschool  
56 473 and Primary Scale of Intelligence. *Developmental Psychology.* 1975;11(2):126-134.  
57  
58  
59 474 23. Sadeghi N, Gilmore JH, Gerig G. Twin-singleton developmental study of brain white matter  
60  
475 anatomy. *Human brain mapping.* 2017;38(2):1009-1024. Available from: PubMed

- 1  
2 476 24. Martin JA, Hamilton BE, Ventura SJ, Osterman MJ, Kirmeyer S, Mathews TJ, et al. Births: final  
3  
4 477 data for 2009. *Natl Vital Stat Rep*. 2011 Nov 3;60(1):1-70.  
5
- 6 478 25. Puccio G, Giuffr  M, Piccione M, Piro E, Malerba V, Corsello G. Intrauterine growth pattern  
7  
8 479 and birthweight discordance in twin pregnancies: a retrospective study. *Italian Journal of Pediatrics*.  
9  
10 480 2014 2014/05/05;40(1):43.  
11
- 12 481 26. Howard K, Roberts G, Lim J, Lee KJ, Barre N, Treyvaud K, et al. Biological and environmental  
13  
14 482 factors as predictors of language skills in very preterm children at 5 years of age. *J Dev Behav Pediatr*.  
15  
16 483 2011 Apr;32(3):239-49.  
17
- 18 484 27. Msall ME, Buck GM, Rogers BT, Catanzaro NL. Kindergarten readiness after extreme  
19  
20 485 prematurity. *Am J Dis Child*. 1992 Nov;146(11):1371-5.  
21  
22
- 23 486 28. Roberts G, Lim J, Doyle LW, Anderson PJ. High rates of school readiness difficulties at 5 years  
24  
25 487 of age in very preterm infants compared with term controls. *J Dev Behav Pediatr*. 2011 Feb-  
26  
27 488 Mar;32(2):117-24.  
28
- 29 489 29. Shah PE, Kaciroti N, Richards B, Lumeng JC. Gestational Age and Kindergarten School  
30  
31 490 Readiness in a National Sample of Preterm Infants. *J Pediatr*. 2016 Nov;178:61-67.  
32  
33
- 34 491 30. Chen JH, Claessens A, Msall ME. Prematurity and school readiness in a nationally representative  
35  
36 492 sample of Australian children: does typically occurring preschool moderate the relationship? *Early*  
37  
38 493 *Hum Dev*. 2014 Feb;90(2):73-9.  
39
- 40 494 31. Poulsen G, Wolke D, Kurinczuk JJ, Boyle EM, Field D, Alfirevic Z, et al. Gestational age and  
41  
42 495 cognitive ability in early childhood: a population-based cohort study. *Paediatr Perinat Epidemiol*.  
43  
44 496 2013 Jul;27(4):371-9.  
45
- 46 497 32. Quigley MA, Poulsen G, Boyle E, Wolke D, Field D, Alfirevic Z, et al. Early term and late  
47  
48 498 preterm birth are associated with poorer school performance at age 5 years: a cohort study. *Archives*  
49  
50 499 *of Disease in Childhood - Fetal and Neonatal Edition*. 2012;97(3):F167-F173.  
51
- 52 500 33. Patriankos-Hoobler AI, Msall ME, Huo D, Marks JD, Plesha-Troyke S, Schreiber MD.  
53  
54 501 Predicting school readiness from neurodevelopmental assessments at age 2 years after respiratory  
55  
56 502 distress syndrome in infants born preterm. *Developmental medicine and child neurology*. 2010  
57  
58 503 12/01;52(4):379-385.  
59  
60



- 1  
2 504 34. McCormick MC, Brooks-Gunn J, Workman-Daniels K, Turner J, Peckham GJ. The Health and  
3  
4 505 Developmental Status of Very Low—Birth-Weight Children at School Age. *Jama*.  
5 506 1992;267(16):2204-2208.  
6  
7  
8 507 35. Reichman NE. Low birth weight and school readiness. *Future Child*. 2005 Spring;15(1):91-116.  
9  
10  
11 508 36. Roth J, Figlio DN, Chen Y, Ariet M, Carter RL, Resnick MB, et al. Maternal and infant factors  
12  
13 509 associated with excess kindergarten costs. *Pediatrics*. 2004 Sep;114(3):720-8.  
14  
15 510 37. Avchen RN, Scott KG, Mason CA. Birth weight and school-age disabilities: a population-based  
16  
17 511 study. *Am J Epidemiol*. 2001 Nov 15;154(10):895-901.  
18  
19  
20 512 38. Noeker M. Neurocognitive Development in Children Experiencing Intrauterine Growth  
21  
22 513 Retardation and Born Small for Gestational Age: Pathological, Constitutional and Therapeutic  
23 514 Pathways. *Hormone Research in Paediatrics*. 2005;64(suppl 3)(Suppl. 3):83-88.  
24  
25  
26 515 39. de Bie HM, Oostrom KJ, Delemarre-van de Waal HA. Brain development, intelligence and  
27  
28 516 cognitive outcome in children born small for gestational age. *Horm Res Paediatr*. 2010;73(1):6-14.  
29  
30 517 40. Janus M, Duku E. The School Entry Gap: Socioeconomic, Family, and Health Factors Associated  
31  
32 518 With Children's School Readiness to Learn. *Early Education and Development*. 2007 Oct  
33  
34 519 11;18(3):375-403.  
35  
36  
37 520 41. Mendez LMR, Mihalas ST, Hardesty R. Gender Differences in Academic Development and  
38 521 Performance. 2006.  
39  
40  
41 522 42. Angenent H, De Man A. Intelligence, gender, social maturity, and school readiness in Dutch  
42  
43 523 first-graders. *Social Behavior & Personality: an international journal*. 1989;17(2).  
44  
45  
46 524 43. Janus M, Offord DR. Development and psychometric properties of the Early Development  
47 525 Instrument (EDI): A measure of children's school readiness. *Canadian Journal of Behavioural*  
48  
49 526 *Science/Revue canadienne des sciences du comportement*. 2007;39(1):1.  
50  
51  
52 527 44. Lorenz JM *Seminars in perinatology*: Elsevier p. 201-212  
53  
54 528 45. Gonski D, Boston, K., Greiner, K., Lawrence, C., Scales, B., & Tannock, P. Review of Funding  
55  
56 529 for Schooling - Final Report. Canberra, ACT; 2011.  
57  
58  
59 530 46. The Longitudinal Study of Australian Children Annual statistical report 2013. Melbourne; 2014.  
60

- 1  
2 531 47. Begum L, Islam A, Smyth R. Girl power: stipend programs and the education of younger siblings.  
3  
4 532 The Journal of Development Studies. 2017;53(11):1882-1898.  
5
- 6 533 48. McMillan J, Beavis A, Jones F. The AUSEI06:A new socioeconomic index for Australia. J  
7  
8 534 Sociol. 2009;45(2):123-149.  
9
- 10  
11 535 49. Blair EM, Liu Y, de Klerk NH, Lawrence DM. Optimal fetal growth for the Caucasian singleton  
12  
13 536 and assessment of appropriateness of fetal growth: an analysis of a total population perinatal database.  
14  
15 537 BMC Pediatrics. 2005 2005/05/24;5(1):13.  
16
- 17 538 50. Pereira G, Blair E, Lawrence D. Validation of a model for optimal birth weight: a prospective  
18  
19 539 study using serial ultrasounds. BMC Pediatr. 2012 Jun 15;12:73.  
20
- 21  
22 540 51. SAS Institute. SAS Cary, NC: SAS Institute. Inc; 2012.  
23
- 24 541 52. Australian Early Development Census National Report 2015. Canberra, Australia; 2016.  
25  
26 542 Available from: [https://www.aedc.gov.au/Websilk/Handlers/ResourceDocument.ashx?id=45cf2664-  
29](https://www.aedc.gov.au/Websilk/Handlers/ResourceDocument.ashx?id=45cf2664-<br/>27<br/>28 543 db9a-6d2b-9fad-ff0000a141dd)  
30
- 31 544 53. Falster K, Hanly M, Banks E, Lynch J, Chambers G, Brownell M, et al. Maternal age and  
32 545 offspring developmental vulnerability at age five: A population-based cohort study of Australian  
33  
34 546 children. PLOS Medicine. 2018;15(4):e1002558.  
35
- 36 547 54. Guthridge S, Li L, Silburn S, Li SQ, McKenzie J, Lynch J. Early influences on developmental  
37  
38 548 outcomes among children, at age 5, in Australia's Northern Territory. Early Childhood Research  
39  
40 549 Quarterly. 2016;35:124-134.  
41
- 42  
43 550 55. Chittleborough CR, Searle AK, Smithers LG, Brinkman S, Lynch JW. How well can poor child  
44  
45 551 development be predicted from early life characteristics?: A whole-of-population data linkage study.  
46 552 Early Childhood Research Quarterly. 2016 2016/04/01/;35:19-30.  
47
- 48  
49 553 56. Lemelin J-P, Boivin M, Forget-Dubois N, Dionne G, Séguin JR, Brendgen M, et al. The Genetic-  
50  
51 554 Environmental Etiology of Cognitive School Readiness and Later Academic Achievement in Early  
52 555 Childhood. Child Development. 2007;78(6):1855-1869.  
53
- 54  
55 556 57. Twins Research Australia (TRA). Multiple perspectives: what support do multiple birth families  
56  
57 557 need to live happy and healthy lives. Melbourne; 2019.  
58  
59  
60

- 1  
2 558 58. Goldfeld S, O'Connor M, Mithen J, Sayers M, Brinkman S. Early development of emerging and  
3  
4 559 English-proficient bilingual children at school entry in an Australian population cohort. *International*  
5  
6 560 *Journal of Behavioral Development*. 2014;38(1):42-51.  
7  
8 561 59. Guhn M, Gadermann A, Almas A, Schonert-Reichl K, Hertzman C. Associations of teacher-  
9  
10 562 rated social, emotional, and cognitive development in kindergarten to self-reported wellbeing, peer  
11  
12 563 relations, and academic test scores in middle childhood. *Early Child Res Q*. 2016;35:76-84.  
13  
14 564 60. Tsou M-T, Tsou M-W, Wu M-P, Liu J-T. Academic achievement of twins and singletons in early  
15  
16 565 adulthood: Taiwanese cohort study. *BMJ*. 2008;337:a438.  
17  
18  
19 566 61. Record RG, McKeown T, Edwards JH. An investigation of the difference in measured  
20  
21 567 intelligence between twins and single births. *Annals of Human Genetics*. 1970;34(1):11-20.  
22  
23 568 62. Brooks-Gunn J, Han WJ, Waldfogel J. Maternal employment and child cognitive outcomes in  
24  
25 569 the first three years of life: the NICHD Study of Early Child Care. National Institute of Child Health  
26  
27 570 and Human Development. *Child Dev*. 2002 Jul-Aug;73(4):1052-72.  
28  
29 571 63. Dearing E, McCartney K, Taylor BA. Change in family income-to-needs matters more for  
30  
31 572 children with less. *Child Development*. 2001;72(6):1779-1793.  
32  
33  
34 573 64. Abbott-Shim M, Lambert R, McCarty F. A Comparison of School Readiness Outcomes for  
35  
36 574 Children Randomly Assigned to a Head Start Program and the Program's Wait List. *Journal of*  
37  
38 575 *Education for Students Placed at Risk*. 2003;8(2):191-214.  
39  
40 576 65. Ramey CT, Ramey SL. Early learning and school readiness: Can early intervention make a  
41  
42 577 difference? *Merrill-Palmer Quarterly (1982-)*. 2004:471-491.  
43  
44 578

45  
46  
47  
48  
49  
50  
51  
52  
53  
54  
55  
56  
57  
58  
59  
60

**Figures & Tables: Total 1 Figure & 2 Tables**

Figure 1. Eligible Cohort and Numbers Included for Analyses.

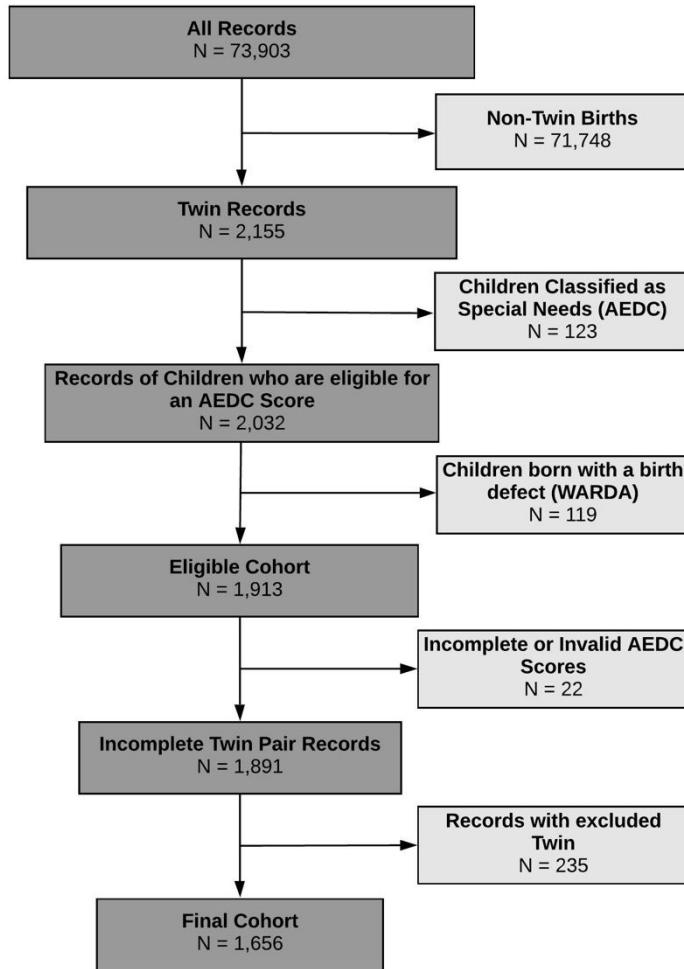

AEDC = Australian Early Development Census. WARDA= Western Australian Register of Developmental Anomalies.

1

2 583

3 584

Table 1. Risk factors for children who are developmentally vulnerable on one or more AEDC domains (DV1).

| Characteristic                                            | DV1<br>(N=431)<br>N (%) | NDV1<br>(N=1,225)<br>N (%) | Bivariate<br>OR [95% CI]      | Multivariable<br>(N=1,352)<br>aOR [95% CI] |
|-----------------------------------------------------------|-------------------------|----------------------------|-------------------------------|--------------------------------------------|
| <b>Maternal</b>                                           |                         |                            |                               |                                            |
| <b>Age at Time of Child's Birth</b>                       |                         |                            |                               |                                            |
| ≤20 years                                                 | 48 (11.14)              | 34 (2.78)                  | <b>26.92 [6.82-106.31]***</b> | <b>8.69 [1.52-49.69]*</b>                  |
| 21-25 years                                               | 69 (16.01)              | 135 (11.02)                | <b>2.96 [1.15-7.62]</b>       | 2.16 [0.75-6.16]                           |
| 26-30 years                                               | 101 (23.43)             | 333 (27.18)                | 1.00 [referent]               | 1.00 [referent]                            |
| 31-35 years                                               | 133 (30.86)             | 465 (37.96)                | 0.91 [0.44-1.88]              | 1.14 [0.49-2.63]                           |
| 36-40 years                                               | 61 (14.15)              | 229 (18.69)                | 0.81 [0.34-1.95]              | 1.22 [0.44-3.39]                           |
| >40 years                                                 | 19 (4.41)               | 29 (2.37)                  | 4.77 [0.89-25.52]             | 3.74 [0.51-27.53]                          |
| <b>Marital Status</b>                                     |                         |                            |                               |                                            |
| Married (inc. de facto)                                   | 357 (82.83)             | 1,123 (91.67)              | 1.00 [referent]               | 1.00 [referent]                            |
| All Other                                                 | 72 (16.71)              | 98 (8.00)                  | <b>5.99 [2.43-14.75]***</b>   | 1.95 [0.65-5.85]                           |
| Unavailable                                               | 2 (0.46)                | 4 (0.33)                   |                               |                                            |
| <b>Occupational Status Scale at Time of Child's Birth</b> |                         |                            |                               |                                            |
| 0-20                                                      | 122 (28.31)             | 187 (15.27)                | <b>7.97 [3.08-20.66]***</b>   | 2.41 [0.76-7.64]                           |
| >20-40                                                    | 119 (27.61)             | 268 (21.88)                | <b>3.74 [1.53-9.14]**</b>     | 2.52 [0.90-7.11]                           |
| >40-60                                                    | 71 (16.47)              | 338 (27.59)                | 0.85 [0.34-2.09]              | 0.67 [0.24-1.86]                           |
| >60-80                                                    | 35 (8.12)               | 164 (13.39)                | 0.90 [0.30-2.64]              | 0.72 [0.20-2.54]                           |
| >80-100                                                   | 54 (12.53)              | 236 (19.27)                | 1.00 [referent]               | 1.00 [referent]                            |
| Unavailable                                               | 30 (6.96)               | 32 (2.61)                  |                               |                                            |
| <b>Pregnancy &amp; Birth</b>                              |                         |                            |                               |                                            |
| <b>Fertility Treatments</b>                               |                         |                            |                               |                                            |
| No                                                        | 377 (87.47)             | 1,011 (82.53)              | 1.00 [referent]               | 1.00 [referent]                            |
| Yes                                                       | 54 (12.53)              | 214 (17.47)                | 0.43 [0.19-0.97]              | 0.78 [0.29-2.06]                           |
| <b>Smoking Status During Pregnancy</b>                    |                         |                            |                               |                                            |
| No                                                        | 339 (78.65)             | 1,079 (88.08)              | 1.00 [referent]               | 1.00 [referent]                            |
| Yes                                                       | 92 (21.35)              | 146 (11.92)                | <b>4.31 [1.95-9.53]***</b>    | 0.91 [0.35-2.37]                           |
| <b>Pre-eclampsia</b>                                      |                         |                            |                               |                                            |
| No                                                        | 375 (87.01)             | 1,085 (88.57)              | 1.00 [referent]               | 1.00 [referent]                            |
| Yes                                                       | 56 (12.99)              | 140 (11.43)                | 1.40 [0.59-3.34]              | 1.91 [0.71-5.17]                           |
| <b>Gestational Diabetes</b>                               |                         |                            |                               |                                            |
| No                                                        | 402 (93.27)             | 1,152 (94.04)              | 1.00 [referent]               | 1.00 [referent]                            |
| Yes                                                       | 29 (6.73)               | 73 (5.96)                  | 1.30 [0.40-4.22]              | 1.16 [0.33-4.09]                           |
| <b>Threatened Abortion</b>                                |                         |                            |                               |                                            |
| No                                                        | 416 (96.52)             | 1,156 (94.37)              | 1.00 [referent]               | 1.00 [referent]                            |
| Yes                                                       | 15 (3.48)               | 69 (5.63)                  | 0.36 [0.09-1.45]              | 0.19 [0.03-1.13]                           |
| <b>Other Pregnancy Related Complications</b>              |                         |                            |                               |                                            |
| No                                                        | 125 (29.00)             | 451 (36.82)                | 1.00 [referent]               | 1.00 [referent]                            |
| Yes                                                       | 306 (71.00)             | 774 (63.18)                | <b>2.08 [1.12-3.85]*</b>      | 1.79 [0.84-3.80]                           |
| <b>Threatened Preterm Labour</b>                          |                         |                            |                               |                                            |
| No                                                        | 376 (87.24)             | 1,088 (88.82)              | 1.00 [referent]               | 1.00 [referent]                            |
| Yes                                                       | 55 (12.76)              | 137 (11.18)                | 1.34 [0.55-3.24]              | 0.78 [0.29-2.10]                           |
| <b>APH</b>                                                |                         |                            |                               |                                            |
| No                                                        | 411 (95.36)             | 1,187 (96.90)              | 1.00 [referent]               | 1.00 [referent]                            |
| Yes                                                       | 20 (4.64)               | 38 (3.10)                  | 2.38 [0.53-10.73]             | 0.68 [0.12-3.97]                           |
| <b>Placenta Praevia</b>                                   |                         |                            |                               |                                            |
| No                                                        | 429 (99.54)             | 1,217 (99.35)              |                               |                                            |
| Yes                                                       | 2 (0.46)                | 8 (0.65)                   |                               |                                            |
| <b>Placental Abruption <sup>a</sup></b>                   |                         |                            |                               |                                            |
| No                                                        | 427 (99.07)             | 1,223 (99.84)              |                               |                                            |

|                                                            |              |               |                              |                            |
|------------------------------------------------------------|--------------|---------------|------------------------------|----------------------------|
| Yes                                                        | 4 (0.93)     | 2 (0.16)      |                              |                            |
| <b>Fetal Distress</b>                                      |              |               |                              |                            |
| No                                                         | 382 (88.63)  | 1,136 (92.73) | 1.00 [referent]              | 1.00 [referent]            |
| Yes                                                        | 49 (11.37)   | 89 (7.27)     | <b>2.92 [1.13-7.58]*</b>     | 2.00 [0.68-5.86]           |
| <b>Cephalopelvic Disproportion<sup>a</sup></b>             |              |               |                              |                            |
| No                                                         | 431 (100.00) | 1,221 (99.67) |                              |                            |
| Yes                                                        | 0 (0.00)     | 4 (0.33)      |                              |                            |
| <b>Prolapsed Cord<sup>a</sup></b>                          |              |               |                              |                            |
| No                                                         | 428 (99.30)  | 1,215 (99.18) |                              |                            |
| Yes                                                        | 3 (0.70)     | 10 (0.82)     |                              |                            |
| <b>Precipitate Delivery<sup>a</sup></b>                    |              |               |                              |                            |
| No                                                         | 424 (98.38)  | 1,206 (98.45) |                              |                            |
| Yes                                                        | 7 (1.62)     | 19 (1.55)     |                              |                            |
| <b>PPH ≥500mls</b>                                         |              |               |                              |                            |
| No                                                         | 281 (65.20)  | 918 (74.94)   | 1.00 [referent]              | 1.00 [referent]            |
| Yes                                                        | 150 (34.80)  | 307 (25.06)   | <b>2.59 [1.39-4.82]**</b>    | 1.48 [0.71-3.07]           |
| <b>TSR ≥2mins</b>                                          |              |               |                              |                            |
| No                                                         | 364 (84.45)  | 1,060 (86.53) | 1.00 [referent]              | 1.00 [referent]            |
| Yes                                                        | 67 (15.55)   | 165 (13.47)   | 1.06 [0.56-1.99]             | 0.50 [0.22-1.17]           |
| <b>Apgar 5-minutes &lt;7<sup>a</sup></b>                   |              |               |                              |                            |
| No                                                         | 425 (98.61)  | 1,198 (97.80) |                              |                            |
| Yes                                                        | 6 (1.39)     | 27 (2.20)     |                              |                            |
| <b>Intubation</b>                                          |              |               |                              |                            |
| No                                                         | 353 (81.90)  | 1,198 (97.80) | 1.00 [referent]              | 1.00 [referent]            |
| Yes                                                        | 78 (18.10)   | 27 (2.20)     | 1.36 [0.75-2.45]             | 1.41 [0.65-3.08]           |
| <b>Early Preterm Birth</b>                                 |              |               |                              |                            |
| No                                                         | 352 (81.67)  | 1,058 (86.37) | 1.00 [referent]              | 1.00 [referent]            |
| Yes                                                        | 79 (18.33)   | 167 (13.63)   | 2.08 [0.94-4.56]             | 1.38 [0.56-3.38]           |
| <b>POBW &lt;15<sup>th</sup> Percentile</b>                 |              |               |                              |                            |
| No                                                         | 305 (70.77)  | 926 (75.59)   | 1.00 [referent]              | 1.00 [referent]            |
| Yes                                                        | 81 (18.79)   | 136 (11.10)   | <b>2.09 [1.14-3.84]*</b>     | <b>2.04 [1.05-3.97]*</b>   |
| Unavailable                                                | 45 (10.44)   | 163 (13.31)   |                              |                            |
| <b>Parity</b>                                              |              |               |                              |                            |
| 0                                                          | 150 (34.80)  | 512 (41.80)   | 1.00 [referent]              | 1.00 [referent]            |
| 1                                                          | 154 (35.73)  | 429 (35.02)   | 1.62 [0.83-3.16]             | 1.93 [0.74-5.02]           |
| ≥2                                                         | 127 (29.47)  | 284 (23.18)   | <b>2.50 [1.20-5.22]*</b>     | 1.60 [0.43-5.98]           |
| <b>Child</b>                                               |              |               |                              |                            |
| <b>Sex</b>                                                 |              |               |                              |                            |
| Female                                                     | 176 (40.84)  | 674 (55.02)   | 1.00 [referent]              | 1.00 [referent]            |
| Male                                                       | 255 (59.16)  | 551 (44.98)   | <b>4.44 [2.68-7.36]***</b>   | <b>5.25 [2.99-9.24]***</b> |
| <b>Ethnicity</b>                                           |              |               |                              |                            |
| Other                                                      | 385 (89.33)  | 1,187 (96.90) | 1.00 [referent]              | 1.00 [referent]            |
| Indigenous Australian                                      | 46 (10.67)   | 38 (3.10)     | <b>16.98 [4.85-59.46]***</b> | 2.80 [0.53-14.80]          |
| <b>Child Speaks Language Other Than English at Home</b>    |              |               |                              |                            |
| No                                                         | 367 (85.15)  | 1,149 (93.80) | 1.00 [referent]              | 1.00 [referent]            |
| Yes                                                        | 64 (14.85)   | 76 (6.20)     | <b>6.28 [2.48-15.90]***</b>  | <b>5.25 [1.77-15.56]**</b> |
| <b>Age Category at Time of AEDC Completion<sup>b</sup></b> |              |               |                              |                            |
| 1                                                          | 109 (25.29)  | 212 (17.31)   | <b>2.93 [1.45-5.90]**</b>    | <b>3.10 [1.44-6.69]**</b>  |
| 2                                                          | 288 (66.82)  | 911 (74.37)   | 1.00 [referent]              | 1.00 [referent]            |
| 3                                                          | 34 (7.89)    | 102 (8.33)    | 1.18 [0.43-3.27]             | 0.94 [0.29-3.06]           |
| <b>Total Number of Siblings</b>                            |              |               |                              |                            |
| 1                                                          | 119 (27.61)  | 389 (31.76)   | 1.00 [referent]              | 1.00 [referent]            |
| 2                                                          | 160 (37.12)  | 494 (40.33)   | 1.15 [0.58-2.30]             | 0.59 [0.22-1.58]           |
| 3                                                          | 74 (17.17)   | 240 (19.59)   | 1.04 [0.45-2.41]             | 0.41 [0.12-1.45]           |

1  
2  
3  
4  
5  
6  
7  
8  
9  
10  
11  
12

|                                                     |             |               |                             |                   |
|-----------------------------------------------------|-------------|---------------|-----------------------------|-------------------|
| >3                                                  | 78 (18.10)  | 102 (8.33)    | <b>7.28 [2.73-19.45]***</b> | 2.61 [0.58-11.79] |
| <b>Sociodemographic</b>                             |             |               |                             |                   |
| <b>Index of Relative Socioeconomic Disadvantage</b> |             |               |                             |                   |
| Lowest Quintile                                     | 327 (75.87) | 1,046 (85.39) | <b>3.55 [1.62-7.78]**</b>   | 1.36 [0.55-3.37]  |
| > Lowest Quintile                                   | 87 (20.19)  | 150 (12.24)   | 1.00 [referent]             | 1.00 [referent]   |
| Unavailable                                         | 17 (3.94)   | 29 (2.37)     |                             |                   |

\*p<0.05, \*\*p<0.01, \*\*\*p<0.001

<sup>a</sup> Excluded from multivariable analysis due to small N.

<sup>b</sup> Age categories classified as; ≥3 years 10 months to <5 years and one month, 2) ≥5 years and one month to <5 years and 10 months (reference category), 3) ≥5 years and 10 months to <6 years 10 months.

For peer review only



Table 2. Risk factors for children who are developmentally vulnerable on two or more AEDC domains (DV2).

| Characteristic                                            | DV2<br>(N=223)<br>N (%) | NDV2<br>(N=1,433)<br>N (%) | Bivariate<br>OR [95% CI]      | Multivariable<br>(N=1,352)<br>aOR [95% CI] |
|-----------------------------------------------------------|-------------------------|----------------------------|-------------------------------|--------------------------------------------|
| <b>Maternal</b>                                           |                         |                            |                               |                                            |
| <b>Age at Time of Child's Birth</b>                       |                         |                            |                               |                                            |
| ≤20 years                                                 | 31 (13.90)              | 51 (3.56)                  | <b>21.86 [4.97-96.20]</b> *** | 3.94 [0.48-32.25]                          |
| 21-25 years                                               | 38 (17.04)              | 166 (11.58)                | 2.73 [0.89-8.31]              | 1.17 [0.31-4.35]                           |
| 26-30 years                                               | 52 (23.32)              | 382 (26.66)                | 1.00 [referent]               | 1.00 [referent]                            |
| 31-35 years                                               | 69 (30.94)              | 529 (36.92)                | 0.85 [0.35-2.06]              | 1.24 [0.40-3.90]                           |
| 36-40 years                                               | 24 (10.76)              | 266 (18.56)                | 0.46 [0.15-1.42]              | 0.60 [0.14-2.55]                           |
| >40 years                                                 | 9 (4.04)                | 39 (2.72)                  | 2.35 [0.32-17.31]             | 0.76 [0.04-13.56]                          |
| <b>Marital Status</b>                                     |                         |                            |                               |                                            |
| Married (inc. de facto)                                   | 172 (77.13)             | 1,308 (91.28)              | 1.00 [referent]               | 1.00 [referent]                            |
| All Other                                                 | 49 (21.97)              | 121 (8.44)                 | <b>9.91 [3.54-27.77]</b> ***  | <b>4.43 [1.08-18.21]</b> *                 |
| Unavailable                                               | 2 (0.90)                | 4 (0.28)                   |                               |                                            |
| <b>Occupational Status Scale at Time of Child's Birth</b> |                         |                            |                               |                                            |
| 0-20                                                      | 78 (34.98)              | 231 (16.12)                | <b>10.45 [3.23-33.77]</b> *** | 3.26 [0.70-15.31]                          |
| >20-40                                                    | 56 (25.11)              | 331 (23.10)                | 2.77 [0.91-8.44]              | 1.54 [0.37-6.40]                           |
| >40-60                                                    | 31 (13.90)              | 378 (26.38)                | 0.66 [0.20-2.10]              | 0.45 [0.10-1.97]                           |
| >60-80                                                    | 15 (6.73)               | 184 (12.84)                | 0.64 [0.16-2.64]              | 0.30 [0.04-2.02]                           |
| >80-100                                                   | 28 (12.56)              | 262 (18.28)                | 1.00 [referent]               | 1.00 [referent]                            |
| Unavailable                                               | 15 (6.73)               | 47 (3.28)                  |                               |                                            |
| <b>Pregnancy &amp; Birth</b>                              |                         |                            |                               |                                            |
| <b>Fertility Treatments</b>                               |                         |                            |                               |                                            |
| No                                                        | 200 (89.69)             | 1,188 (82.90)              | 1.00 [referent]               | 1.00 [referent]                            |
| Yes                                                       | 23 (10.31)              | 245 (17.10)                | 0.35 [0.13-0.97]              | 0.67 [0.16-2.75]                           |
| <b>Smoking Status During Pregnancy</b>                    |                         |                            |                               |                                            |
| No                                                        | 166 (74.44)             | 1,252 (87.37)              | 1.00 [referent]               | 1.00 [referent]                            |
| Yes                                                       | 57 (25.56)              | 181 (12.63)                | <b>5.83 [2.32-14.65]</b> ***  | 1.28 [0.37-4.43]                           |
| <b>Pre-eclampsia</b>                                      |                         |                            |                               |                                            |
| No                                                        | 195 (87.44)             | 1,265 (88.28)              | 1.00 [referent]               | 1.00 [referent]                            |
| Yes                                                       | 28 (12.56)              | 168 (11.72)                | 1.25 [0.41-3.86]              | 2.70 [0.71-10.27]                          |
| <b>Gestational Diabetes</b>                               |                         |                            |                               |                                            |
| No                                                        | 208 (93.27)             | 1,346 (93.93)              | 1.00 [referent]               | 1.00 [referent]                            |
| Yes                                                       | 15 (6.73)               | 87 (6.07)                  | 1.44 [0.32-6.42]              | 2.55 [0.51-12.76]                          |
| <b>Threatened Abortion</b>                                |                         |                            |                               |                                            |
| No                                                        | 214 (95.96)             | 1,358 (94.77)              | 1.00 [referent]               | 1.00 [referent]                            |
| Yes                                                       | 9 (4.04)                | 75 (5.23)                  | 0.54 [0.10-2.94]              | 0.19 [0.02-2.57]                           |
| <b>Other Pregnancy Related Complications</b>              |                         |                            |                               |                                            |
| No                                                        | 57 (25.56)              | 519 (36.22)                | 1.00 [referent]               | 1.00 [referent]                            |
| Yes                                                       | 166 (74.44)             | 914 (63.78)                | <b>2.64 [1.22-5.69]</b> *     | 1.70 [0.59-4.85]                           |
| <b>Threatened Preterm Labour</b>                          |                         |                            |                               |                                            |
| No                                                        | 191 (85.65)             | 1,273 (88.83)              | 1.00 [referent]               | 1.00 [referent]                            |
| Yes                                                       | 32 (14.35)              | 160 (11.17)                | 2.04 [0.66-6.29]              | 0.77 [0.21-2.81]                           |
| <b>APH</b>                                                |                         |                            |                               |                                            |
| No                                                        | 209 (93.72)             | 1,389 (96.93)              | 1.00 [referent]               | 1.00 [referent]                            |
| Yes                                                       | 14 (6.28)               | 44 (3.07)                  | 5.96 [0.95-37.40]             | 1.42 [0.17-12.22]                          |
| <b>Placenta Praevia<sup>a</sup></b>                       |                         |                            |                               |                                            |
| No                                                        | 223 (100.00)            | 1,423 (99.30)              |                               |                                            |
| Yes                                                       | 0 (0.00)                | 10 (0.70)                  |                               |                                            |
| <b>Placental Abruption<sup>a</sup></b>                    |                         |                            |                               |                                            |
| No                                                        | 221 (99.10)             | 1,429 (99.72)              |                               |                                            |



1  
2  
3  
4  
5  
6  
7  
8  
9  
10  
11  
12  
13  
14  
15  
16  
17  
18  
19  
20  
21  
22  
23  
24  
25  
26  
27  
28  
29  
30  
31  
32  
33  
34  
35  
36  
37  
38  
39  
40  
41  
42  
43  
44  
45  
46  
47  
48  
49  
50  
51  
52  
53  
54  
55  
56  
57  
58  
59  
60

|                                                         |              |               |                              |                             |
|---------------------------------------------------------|--------------|---------------|------------------------------|-----------------------------|
| Yes                                                     | 2 (0.90)     | 4 (0.28)      |                              |                             |
| <b>Fetal Distress</b>                                   |              |               |                              |                             |
| No                                                      | 195 (87.44)  | 1,323 (92.32) | 1.00 [referent]              | 1.00 [referent]             |
| Yes                                                     | 28 (12.56)   | 110 (7.68)    | 3.03 [0.90-10.23]            | 1.56 [0.38-6.37]            |
| <b>Cephalopelvic Disproportion<sup>a</sup></b>          |              |               |                              |                             |
| No                                                      | 223 (100.00) | 1,429 (99.72) |                              |                             |
| Yes                                                     | 0 (0.00)     | 4 (0.28)      |                              |                             |
| <b>Prolapsed Cord<sup>a</sup></b>                       |              |               |                              |                             |
| No                                                      | 220 (98.65)  | 1,423 (99.30) |                              |                             |
| Yes                                                     | 3 (1.35)     | 10 (0.70)     |                              |                             |
| <b>Precipitate Delivery<sup>a</sup></b>                 |              |               |                              |                             |
| No                                                      | 219 (98.21)  | 1,411 (98.46) |                              |                             |
| Yes                                                     | 4 (1.79)     | 22 (1.54)     |                              |                             |
| <b>PPH ≥500mls</b>                                      |              |               |                              |                             |
| No                                                      | 141 (63.23)  | 1,058 (73.83) | 1.00 [referent]              | 1.00 [referent]             |
| Yes                                                     | 82 (36.77)   | 375 (26.17)   | <b>3.43 [1.49-7.94]**</b>    | 1.48 [0.56-3.94]            |
| <b>TSR ≥2mins</b>                                       |              |               |                              |                             |
| No                                                      | 183 (82.06)  | 1,241 (86.60) | 1.00 [referent]              | 1.00 [referent]             |
| Yes                                                     | 40 (17.94)   | 192 (13.40)   | 1.78 [0.81-3.89]             | 0.89 [0.30-2.65]            |
| <b>Apgar 5-minutes &lt;7<sup>a</sup></b>                |              |               |                              |                             |
| No                                                      | 219 (98.21)  | 1,404 (97.98) |                              |                             |
| Yes                                                     | 4 (1.79)     | 29 (2.02)     |                              |                             |
| <b>Intubation</b>                                       |              |               |                              |                             |
| No                                                      | 178 (79.82)  | 1,404 (97.98) | 1.00 [referent]              | 1.00 [referent]             |
| Yes                                                     | 45 (20.18)   | 29 (2.02)     | 1.91 [0.90-4.05]             | 1.50 [0.53-4.24]            |
| <b>Early Preterm Birth</b>                              |              |               |                              |                             |
| No                                                      | 172 (77.13)  | 1,238 (86.39) | 1.00 [referent]              | 1.00 [referent]             |
| Yes                                                     | 51 (22.87)   | 195 (13.61)   | <b>4.18 [1.50-11.67]**</b>   | 2.22 [0.69-7.19]            |
| <b>POBW &lt;15<sup>th</sup> Percentile</b>              |              |               |                              |                             |
| No                                                      | 162 (72.65)  | 1,069 (74.60) | 1.00 [referent]              | 1.00 [referent]             |
| Yes                                                     | 42 (18.83)   | 175 (12.21)   | <b>2.72 [1.25-5.93]*</b>     | <b>3.30 [1.33-8.21]*</b>    |
| Unavailable                                             | 19 (8.52)    | 189 (13.19)   |                              |                             |
| <b>Parity</b>                                           |              |               |                              |                             |
| 0                                                       | 79 (35.43)   | 583 (40.68)   | 1.00 [referent]              | 1.00 [referent]             |
| 1                                                       | 73 (32.74)   | 510 (35.59)   | 1.18 [0.51-2.76]             | 1.00 [0.27-3.71]            |
| ≥2                                                      | 71 (31.84)   | 340 (23.73)   | <b>2.66 [1.04-6.83]*</b>     | 2.89 [0.48-17.44]           |
| <b>Child</b>                                            |              |               |                              |                             |
| <b>Sex</b>                                              |              |               |                              |                             |
| Female                                                  | 83 (37.22)   | 767 (53.52)   | 1.00 [referent]              | 1.00 [referent]             |
| Male                                                    | 140 (62.78)  | 666 (46.48)   | <b>5.42 [2.79-10.55]***</b>  | <b>7.98 [3.49-18.25]***</b> |
| <b>Ethnicity</b>                                        |              |               |                              |                             |
| Other                                                   | 197 (88.34)  | 1,375 (95.95) | 1.00 [referent]              | 1.00 [referent]             |
| Indigenous Australian                                   | 26 (11.66)   | 58 (4.05)     | <b>11.00 [2.78-43.60]***</b> | 2.76 [0.37-20.58]           |
| <b>Child Speaks Language Other Than English at Home</b> |              |               |                              |                             |
| No                                                      | 192 (86.10)  | 1,324 (92.39) | 1.00 [referent]              | 1.00 [referent]             |
| Yes                                                     | 31 (13.90)   | 109 (7.61)    | 3.19 [0.96-10.63]            | 3.94 [0.97-16.08]           |
| <b>Age Category at Time of AEDC Completion</b>          |              |               |                              |                             |
| 1                                                       | 66 (29.6)    | 255 (17.79)   | <b>4.11 [1.80-9.39]***</b>   | <b>4.89 [1.77-13.48]**</b>  |
| 2                                                       | 142 (63.68)  | 1057 (73.76)  | 1.00 [referent]              | 1.00 [referent]             |
| 3                                                       | 15 (6.73)    | 121 (8.44)    | 0.95 [0.26-3.46]             | 0.33 [0.06-1.97]            |
| <b>Total Number of Siblings</b>                         |              |               |                              |                             |
| 1                                                       | 58 (26.01)   | 450 (31.40)   | 1.00 [referent]              | 1.00 [referent]             |
| 2                                                       | 84 (37.67)   | 570 (39.78)   | 1.35 [0.57-3.19]             | 1.12 [0.29-4.26]            |
| 3                                                       | 38 (17.04)   | 276 (19.26)   | 1.14 [0.40-3.24]             | 0.41 [0.07-2.38]            |

|                                                     |             |               |                             |                   |
|-----------------------------------------------------|-------------|---------------|-----------------------------|-------------------|
| >3                                                  | 43 (19.28)  | 137 (9.56)    | <b>7.14 [2.24-22.72]***</b> | 2.25 [0.30-17.06] |
| <b>Sociodemographic</b>                             |             |               |                             |                   |
| <b>Index of Relative Socioeconomic Disadvantage</b> |             |               |                             |                   |
| Lowest Quintile                                     | 175 (78.48) | 1,198 (83.60) | 2.14 [0.76-6.02]            | 0.57 [0.17-1.90]  |
| > Lowest Quintile                                   | 39 (17.49)  | 198 (13.82)   | 1.00 [referent]             | 1.00 [referent]   |
| Unavailable                                         | 9 (4.04)    | 37 (2.58)     |                             |                   |

\*p<0.05, \*\*p<0.01, \*\*\*p<0.001

<sup>a</sup> Excluded from multivariable analysis due to small N.

<sup>b</sup> Age categories classified as; ≥3 years 10 months to <5 years and one month, 2) ≥5 years and one month to <5 years and 10 months (reference category), 3) ≥5 years and 10 months to <6 years 10 months.

For peer review only

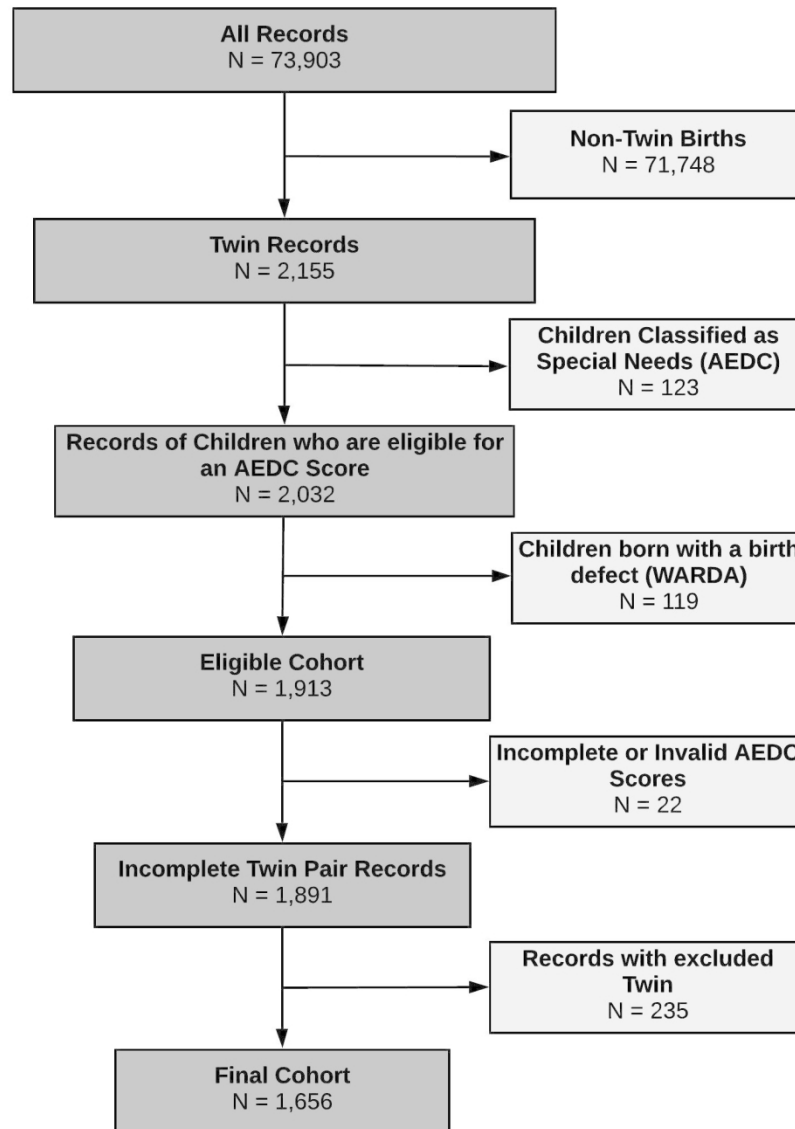

45 Figure 1. Eligible Cohort and Numbers Included for Analyses.  
46 AEDC = Australian Early Development Census. WARDA= Western Australian Register of Developmental  
47 Anomalies.

48 132x182mm (300 x 300 DPI)

## Supplementary Tables and Figures (Total: 5 tables, 0 figures)

Table 1. Risk Factors for Developmental Vulnerability on the Physical Health &amp; Wellbeing Domain.

| Characteristic                                            | DV<br>(N=188)<br>N (%) | NDV<br>(N=1,468)<br>N (%) | Bivariate<br>OR [95% CI]     | Multivariable<br>(N=1,352)<br>aOR [95% CI] |
|-----------------------------------------------------------|------------------------|---------------------------|------------------------------|--------------------------------------------|
| <b>Maternal</b>                                           |                        |                           |                              |                                            |
| <b>Age at Time of Child's Birth</b>                       |                        |                           |                              |                                            |
| ≤20 years                                                 | 24 (12.77)             | 58 (3.95)                 | <b>11.73 [2.52-54.66]***</b> | 3.87 [0.56-26.94]                          |
| 21-25 years                                               | 26 (13.83)             | 178 (12.13)               | 1.33 [0.40-4.46]             | 1.17 [0.31-4.35]                           |
| 26-30 years                                               | 48 (25.53)             | 386 (26.29)               | 1.00 [referent]              | 1.00 [referent]                            |
| 31-35 years                                               | 61 (32.45)             | 537 (36.58)               | 0.88 [0.35-2.20]             | 1.10 [0.39-3.09]                           |
| 36-40 years                                               | 22 (11.70)             | 268 (18.26)               | 0.47 [0.15-1.52]             | 0.42 [0.11-1.66]                           |
| >40 years                                                 | 7 (3.72)               | 41 (2.79)                 | 1.59 [0.19-13.59]            | 0.62 [0.04-9.67]                           |
| <b>Marital Status</b>                                     |                        |                           |                              |                                            |
| Married (inc. de facto)                                   | 152 (80.85)            | 1,328 (90.46)             | 1.00 [referent]              | 1.00 [referent]                            |
| All Other                                                 | 36 (19.15)             | 134 (9.13)                | <b>5.54 [1.87-16.35]**</b>   | 2.21 [0.60-8.13]                           |
| Unavailable                                               | 0 (0.00)               | 6 (0.41)                  |                              |                                            |
| <b>Occupational Status Scale at Time of Child's Birth</b> |                        |                           |                              |                                            |
| 0-20                                                      | 52 (27.66)             | 257 (17.51)               | <b>3.72 [1.18-11.71]*</b>    | 0.53 [0.12-2.25]                           |
| >20-40                                                    | 48 (25.53)             | 339 (23.09)               | 2.10 [0.69-6.34]             | 0.91 [0.26-3.26]                           |
| >40-60                                                    | 33 (17.55)             | 376 (25.61)               | 0.81 [0.26-2.55]             | 0.43 [0.12-1.57]                           |
| >60-80                                                    | 13 (6.91)              | 186 (12.67)               | 0.66 [0.16-2.65]             | 0.28 [0.05-1.50]                           |
| >80-100                                                   | 25 (13.30)             | 265 (18.05)               | 1.00 [referent]              | 1.00 [referent]                            |
| Unavailable                                               | 17 (9.04)              | 45 (3.07)                 |                              |                                            |
| <b>Pregnancy &amp; Birth</b>                              |                        |                           |                              |                                            |
| <b>Fertility Treatments</b>                               |                        |                           |                              |                                            |
| No                                                        | 163 (86.70)            | 1,225 (83.45)             | 1.00 [referent]              | 1.00 [referent]                            |
| Yes                                                       | 25 (13.30)             | 243 (16.55)               | 0.61 [0.21-1.75]             | 1.15 [0.33-3.93]                           |
| <b>Smoking Status During Pregnancy</b>                    |                        |                           |                              |                                            |
| No                                                        | 134 (71.28)            | 1,284 (87.47)             | 1.00 [referent]              | 1.00 [referent]                            |
| Yes                                                       | 54 (28.72)             | 184 (12.53)               | <b>7.19 [2.76-18.70]***</b>  | 2.66 [0.87-8.14]                           |
| <b>Pre-eclampsia</b>                                      |                        |                           |                              |                                            |
| No                                                        | 163 (86.70)            | 1,297 (88.35)             | 1.00 [referent]              | 1.00 [referent]                            |
| Yes                                                       | 25 (13.30)             | 171 (11.65)               | 1.56 [0.46-5.24]             | 3.11 [0.94-10.34]                          |
| <b>Gestational Diabetes</b>                               |                        |                           |                              |                                            |
| No                                                        | 173 (92.02)            | 1,381 (94.07)             | 1.00 [referent]              | 1.00 [referent]                            |
| Yes                                                       | 15 (7.98)              | 87 (5.93)                 | 1.87 [0.36-9.87]             | 2.50 [0.56-11.24]                          |
| <b>Threatened Abortion</b>                                |                        |                           |                              |                                            |
| No                                                        | 182 (96.81)            | 1,390 (94.69)             | 1.00 [referent]              | 1.00 [referent]                            |
| Yes                                                       | 6 (3.19)               | 78 (5.31)                 | 0.45 [0.07-2.71]             | 0.37 [0.04-3.34]                           |
| <b>Other Pregnancy Related Complications</b>              |                        |                           |                              |                                            |
| No                                                        | 51 (27.13)             | 525 (35.76)               | 1.00 [referent]              | 1.00 [referent]                            |
| Yes                                                       | 137 (72.87)            | 943 (64.24)               | 1.96 [0.87-4.42]             | 1.76 [0.67-4.64]                           |
| <b>Threatened Preterm Labour</b>                          |                        |                           |                              |                                            |
| No                                                        | 161 (85.64)            | 1,303 (88.76)             | 1.00 [referent]              | 1.00 [referent]                            |
| Yes                                                       | 27 (14.36)             | 165 (11.24)               | 1.68 [0.49-5.81]             | 0.82 [0.25-2.76]                           |
| <b>APH</b>                                                |                        |                           |                              |                                            |
| No                                                        | 178 (94.68)            | 1,420 (96.73)             | 1.00 [referent]              | 1.00 [referent]                            |
| Yes                                                       | 10 (5.32)              | 48 (3.27)                 | 3.27 [0.37-28.63]            | 0.72 [0.09-5.98]                           |
| <b>Placenta Praevia <sup>a</sup></b>                      |                        |                           |                              |                                            |
| No                                                        | 187 (99.47)            | 1,459 (99.39)             |                              |                                            |
| Yes                                                       | 1 (0.53)               | 9 (0.61)                  |                              |                                            |
| <b>Placental Abruption <sup>a</sup></b>                   |                        |                           |                              |                                            |
| No                                                        | 185 (98.40)            | 1,465 (99.8)              |                              |                                            |
| Yes                                                       | 3 (1.60)               | 3 (0.20)                  |                              |                                            |
| <b>Fetal Distress</b>                                     |                        |                           |                              |                                            |

|                                                         |              |               |                             |                            |
|---------------------------------------------------------|--------------|---------------|-----------------------------|----------------------------|
| No                                                      | 162 (86.17)  | 1,356 (92.37) | 1.00 [referent]             | 1.00 [referent]            |
| Yes                                                     | 26 (13.83)   | 112 (7.63)    | <b>4.89 [1.20-19.90]*</b>   | 2.52 [0.70-9.05]           |
| <b>Cephalopelvic Disproportion<sup>a</sup></b>          |              |               |                             |                            |
| No                                                      | 188 (100.00) | 1,464 (99.73) |                             |                            |
| Yes                                                     | 0 (0.00)     | 4 (0.27)      |                             |                            |
| <b>Prolapsed Cord<sup>a</sup></b>                       |              |               |                             |                            |
| No                                                      | 188 (100.00) | 1,455 (99.11) |                             |                            |
| Yes                                                     | 0 (0.00)     | 13 (0.89)     |                             |                            |
| <b>Precipitate Delivery<sup>a</sup></b>                 |              |               |                             |                            |
| No                                                      | 186 (98.94)  | 1,444 (98.37) |                             |                            |
| Yes                                                     | 2 (1.06)     | 24 (1.63)     |                             |                            |
| <b>PPH ≥500mls</b>                                      |              |               |                             |                            |
| No                                                      | 124 (65.96)  | 1,075 (73.23) | 1.00 [referent]             | 1.00 [referent]            |
| Yes                                                     | 64 (34.04)   | 393 (26.77)   | 2.16 [0.90-5.18]            | 0.86 [0.34-2.13]           |
| <b>TSR ≥2mins</b>                                       |              |               |                             |                            |
| No                                                      | 152 (80.85)  | 1,272 (86.65) | 1.00 [referent]             | 1.00 [referent]            |
| Yes                                                     | 36 (19.15)   | 196 (13.35)   | 1.48 [0.64-3.44]            | 0.53 [0.19-1.49]           |
| <b>Apgar 5-minutes &lt;7<sup>a</sup></b>                |              |               |                             |                            |
| No                                                      | 182 (96.81)  | 1,441 (98.16) |                             |                            |
| Yes                                                     | 6 (3.19)     | 27 (1.84)     |                             |                            |
| <b>Intubation</b>                                       |              |               |                             |                            |
| No                                                      | 147 (78.19)  | 1,242 (84.60) | 1.00 [referent]             | 1.00 [referent]            |
| Yes                                                     | 41 (21.81)   | 226 (15.40)   | <b>2.33 [1.03-5.28]*</b>    | 1.85 [0.72-4.77]           |
| <b>Early Preterm Birth</b>                              |              |               |                             |                            |
| No                                                      | 146 (77.66)  | 1,264 (86.1)  | 1.00 [referent]             | 1.00 [referent]            |
| Yes                                                     | 42 (22.34)   | 204 (13.9)    | <b>3.76 [1.21-11.68]*</b>   | 2.21 [0.77-6.29]           |
| <b>POBW &lt;15<sup>th</sup> Percentile</b>              |              |               |                             |                            |
| No                                                      | 125 (66.49)  | 1,106 (75.34) | 1.00 [referent]             | 1.00 [referent]            |
| Yes                                                     | 42 (22.34)   | 175 (11.92)   | <b>3.44 [1.53-7.74]**</b>   | <b>2.71 [1.21-6.10]*</b>   |
| Unavailable                                             | 21 (11.17)   | 187 (12.74)   |                             |                            |
| <b>Parity</b>                                           |              |               |                             |                            |
| 0                                                       | 67 (35.64)   | 595 (40.53)   | 1.00 [referent]             | 1.00 [referent]            |
| 1                                                       | 65 (34.57)   | 518 (35.29)   | 1.18 [0.48-2.86]            | 1.28 [0.40-4.13]           |
| ≥2                                                      | 56 (29.79)   | 355 (24.18)   | 1.81 [0.67-4.91]            | 1.52 [0.28-8.29]           |
| <b>Child</b>                                            |              |               |                             |                            |
| <b>Sex</b>                                              |              |               |                             |                            |
| Female                                                  | 82 (43.62)   | 768 (52.32)   | 1.00 [referent]             | 1.00 [referent]            |
| Male                                                    | 106 (56.38)  | 700 (47.68)   | <b>2.50 [1.36-4.61]**</b>   | <b>3.33 [1.65-6.71]***</b> |
| <b>Ethnicity</b>                                        |              |               |                             |                            |
| Other                                                   | 167 (88.83)  | 1,405 (95.71) | 1.00 [referent]             | 1.00 [referent]            |
| Indigenous Australian                                   | 21 (11.17)   | 63 (4.29)     | <b>12.56 [2.12-74.52]**</b> | 0.87 [0.13-5.91]           |
| <b>Child Speaks Language Other Than English at Home</b> |              |               |                             |                            |
| No                                                      | 159 (84.57)  | 1,357 (92.44) | 1.00 [referent]             | 1.00 [referent]            |
| Yes                                                     | 29 (15.43)   | 111 (7.56)    | <b>4.62 [1.24-17.26]*</b>   | <b>4.04 [1.13-14.47]*</b>  |
| <b>Age Category at Time of AEDC Completion</b>          |              |               |                             |                            |
| 1                                                       | 50 (26.6)    | 271 (18.46)   | <b>2.76 [1.02-7.46]*</b>    | 2.06 [0.82-5.17]           |
| 2                                                       | 129 (68.62)  | 1,070 (72.89) | 1.00 [referent]             | 1.00 [referent]            |
| 3                                                       | 9 (4.79)     | 127 (8.65)    | 0.44 [0.10-1.93]            | 0.19 [0.03-1.24]           |
| <b>Total Number of Siblings</b>                         |              |               |                             |                            |
| 1                                                       | 51 (27.13)   | 457 (31.13)   | 1.00 [referent]             | 1.00 [referent]            |
| 2                                                       | 69 (36.70)   | 585 (39.85)   | 1.10 [0.46-2.63]            | 0.82 [0.25-2.69]           |
| 3                                                       | 24 (12.77)   | 290 (19.75)   | 0.51 [0.16-1.57]            | 0.34 [0.07-1.77]           |
| >3                                                      | 44 (23.40)   | 136 (9.26)    | <b>8.32 [2.57-26.96]***</b> | 5.52 [0.83-36.72]          |
| <b>Sociodemographic</b>                                 |              |               |                             |                            |
| <b>Index of Relative Socioeconomic Disadvantage</b>     |              |               |                             |                            |
| Lowest Quintile                                         | 138 (73.40)  | 1,235 (84.13) | <b>3.78 [1.17-12.22]*</b>   | 1.68 [0.57-4.94]           |

|                   |            |             |                 |                 |
|-------------------|------------|-------------|-----------------|-----------------|
| > Lowest Quintile | 40 (21.28) | 197 (13.42) | 1.00 [referent] | 1.00 [referent] |
| Unavailable       | 10 (5.32)  | 36 (2.45)   |                 |                 |

\*p<0.05, \*\*p<0.01, \*\*\*p<0.001

<sup>a</sup> Excluded from multivariable analysis due to small N.

<sup>b</sup> Age categories classified as; ≥3 years 10 months to <5 years and one month, 2) ≥5 years and one month to <5 years and 10 months (reference category), 3) ≥5 years and 10 months to <6 years 10 months.

For peer review only

Table 2. Risk Factors for Developmental Vulnerability on the Social Competence Domain.

| Characteristic                                            | DV<br>(N=151)<br>N (%) | NDV<br>(N=1,505)<br>N (%) | Bivariate<br>OR [95% CI]     | Multivariable<br>(N=1,352)<br>aOR [95% CI] |
|-----------------------------------------------------------|------------------------|---------------------------|------------------------------|--------------------------------------------|
| <b>Maternal</b>                                           |                        |                           |                              |                                            |
| <b>Age at Time of Child's Birth</b>                       |                        |                           |                              |                                            |
| ≤20 years                                                 | 21 (13.91)             | 61 (4.05)                 | <b>11.00 [2.29-52.75]***</b> | 1.84 [0.23-14.81]                          |
| 21-25 years                                               | 23 (15.23)             | 181 (12.03)               | 1.63 [0.48-5.54]             | 1.15 [0.28-4.76]                           |
| 26-30 years                                               | 37 (24.50)             | 397 (26.38)               | 1.00 [referent]              | 1.00 [referent]                            |
| 31-35 years                                               | 43 (28.48)             | 555 (36.88)               | 0.65 [0.25-1.71]             | 0.81 [0.26-2.52]                           |
| 36-40 years                                               | 20 (13.25)             | 270 (17.94)               | 0.63 [0.20-2.05]             | 0.79 [0.19-3.24]                           |
| >40 years                                                 | 7 (4.64)               | 41 (2.72)                 | 2.45 [0.30-20.20]            | 0.35 [0.02-7.22]                           |
| <b>Marital Status</b>                                     |                        |                           |                              |                                            |
| Married (inc. de facto)                                   | 113 (74.83)            | 1,367 (90.83)             | 1.00 [referent]              | 1.00 [referent]                            |
| All Other                                                 | 36 (23.84)             | 134 (8.90)                | <b>9.65 [3.20-29.05]***</b>  | <b>9.31 [2.34-37.13]**</b>                 |
| Unavailable                                               | 2 (1.32)               | 4 (0.27)                  |                              |                                            |
| <b>Occupational Status Scale at Time of Child's Birth</b> |                        |                           |                              |                                            |
| 0-20                                                      | 50 (33.11)             | 259 (17.21)               | <b>3.32 [1.08-10.18]*</b>    | 0.86 [0.20-3.76]                           |
| >20-40                                                    | 38 (25.17)             | 349 (23.19)               | 1.21 [0.41-3.64]             | 0.52 [0.13-2.04]                           |
| >40-60                                                    | 18 (11.92)             | 391 (25.98)               | 0.30 [0.09-1.01]             | 0.17 [0.04-0.75]                           |
| >60-80                                                    | 11 (7.28)              | 188 (12.49)               | 0.38 [0.09-1.65]             | 0.26 [0.04-1.60]                           |
| >80-100                                                   | 27 (17.88)             | 263 (17.48)               | 1.00 [referent]              | 1.00 [referent]                            |
| Unavailable                                               | 7 (4.64)               | 55 (3.65)                 |                              |                                            |
| <b>Pregnancy &amp; Birth</b>                              |                        |                           |                              |                                            |
| <b>Fertility Treatments</b>                               |                        |                           |                              |                                            |
| No                                                        | 132 (87.42)            | 1,256 (83.46)             | 1.00 [referent]              | 1.00 [referent]                            |
| Yes                                                       | 19 (12.58)             | 249 (16.54)               | 0.54 [0.18-1.60]             | 1.32 [0.35-5.00]                           |
| <b>Smoking Status During Pregnancy</b>                    |                        |                           |                              |                                            |
| No                                                        | 116 (76.82)            | 1,302 (86.51)             | 1.00 [referent]              | 1.00 [referent]                            |
| Yes                                                       | 35 (23.18)             | 203 (13.49)               | <b>3.70 [1.06-12.91]*</b>    | 1.31 [0.38-4.57]                           |
| <b>Pre-eclampsia</b>                                      |                        |                           |                              |                                            |
| No                                                        | 134 (88.74)            | 1,326 (88.11)             | 1.00 [referent]              | 1.00 [referent]                            |
| Yes                                                       | 17 (11.26)             | 179 (11.89)               | 0.98 [0.31-3.14]             | 2.03 [0.54-7.58]                           |
| <b>Gestational Diabetes</b>                               |                        |                           |                              |                                            |
| No                                                        | 140 (92.72)            | 1,414 (93.95)             | 1.00 [referent]              | 1.00 [referent]                            |
| Yes                                                       | 11 (7.28)              | 91 (6.05)                 | 1.46 [0.32-6.60]             | 2.41 [0.48-12.17]                          |
| <b>Threatened Abortion</b>                                |                        |                           |                              |                                            |
| No                                                        | 144 (95.36)            | 1,428 (94.88)             | 1.00 [referent]              | 1.00 [referent]                            |
| Yes                                                       | 7 (4.64)               | 77 (5.12)                 | 0.66 [0.11-4.10]             | 0.11 [0.01-2.11]                           |
| <b>Other Pregnancy Related Complications</b>              |                        |                           |                              |                                            |
| No                                                        | 38 (25.17)             | 538 (35.75)               | 1.00 [referent]              | 1.00 [referent]                            |
| Yes                                                       | 113 (74.83)            | 967 (64.25)               | 2.15 [0.89-5.19]             | 2.05 [0.71-5.92]                           |
| <b>Threatened Preterm Labour</b>                          |                        |                           |                              |                                            |
| No                                                        | 131 (86.75)            | 1,333 (88.57)             | 1.00 [referent]              | 1.00 [referent]                            |
| Yes                                                       | 20 (13.25)             | 172 (11.43)               | 1.32 [0.42-4.17]             | 0.70 [0.19-2.61]                           |
| <b>APH</b>                                                |                        |                           |                              |                                            |
| No                                                        | 142 (94.04)            | 1,456 (96.74)             | 1.00 [referent]              | 1.00 [referent]                            |
| Yes                                                       | 9 (5.96)               | 49 (3.26)                 | 3.74 [0.62-22.66]            | 2.17 [0.28-16.92]                          |
| <b>Placenta Praevia<sup>a</sup></b>                       |                        |                           |                              |                                            |
| No                                                        | 151 (100.00)           | 1,495 (99.34)             |                              |                                            |
| Yes                                                       | 0 (0.00)               | 10 (0.66)                 |                              |                                            |
| <b>Placental Abruption<sup>a</sup></b>                    |                        |                           |                              |                                            |
| No                                                        | 149 (98.68)            | 1,501 (99.73)             |                              |                                            |
| Yes                                                       | 2 (1.32)               | 4 (0.27)                  |                              |                                            |
| <b>Fetal Distress</b>                                     |                        |                           |                              |                                            |
| No                                                        | 132 (87.42)            | 1,386 (92.09)             | 1.00 [referent]              | 1.00 [referent]                            |

|                                                            |              |               |                             |                             |
|------------------------------------------------------------|--------------|---------------|-----------------------------|-----------------------------|
| Yes                                                        | 19 (12.58)   | 119 (7.91)    | 2.77 [0.81-9.50]            | 1.36 [0.33-5.69]            |
| <b>Cephalopelvic Disproportion<sup>a</sup></b>             |              |               |                             |                             |
| No                                                         | 151 (100.00) | 1,501 (99.73) |                             |                             |
| Yes                                                        | 0 (0.00)     | 4 (0.27)      |                             |                             |
| <b>Prolapsed Cord<sup>a</sup></b>                          |              |               |                             |                             |
| No                                                         | 148 (98.01)  | 1,495 (99.34) |                             |                             |
| Yes                                                        | 3 (1.99)     | 10 (0.66)     |                             |                             |
| <b>Precipitate Delivery<sup>a</sup></b>                    |              |               |                             |                             |
| No                                                         | 149 (98.68)  | 1,476 (98.07) |                             |                             |
| Yes                                                        | 2 (1.32)     | 29 (1.93)     |                             |                             |
| <b>PPH ≥500mls</b>                                         |              |               |                             |                             |
| No                                                         | 96 (63.58)   | 1,103 (73.29) | 1.00 [referent]             | 1.00 [referent]             |
| Yes                                                        | 55 (36.42)   | 402 (26.71)   | <b>2.61 [1.14-5.97]*</b>    | 1.34 [0.51-3.53]            |
| <b>TSR ≥2mins</b>                                          |              |               |                             |                             |
| No                                                         | 119 (78.81)  | 1,305 (86.71) | 1.00 [referent]             | 1.00 [referent]             |
| Yes                                                        | 32 (21.19)   | 200 (13.29)   | 1.76 [0.80-3.89]            | 0.77 [0.26-2.34]            |
| <b>Apgar 5-minutes &lt;7<sup>a</sup></b>                   |              |               |                             |                             |
| No                                                         | 147 (97.35)  | 1,476 (98.07) |                             |                             |
| Yes                                                        | 4 (2.65)     | 29 (1.93)     |                             |                             |
| <b>Intubation</b>                                          |              |               |                             |                             |
| No                                                         | 112 (74.17)  | 1,277 (84.85) | 1.00 [referent]             | 1.00 [referent]             |
| Yes                                                        | 39 (25.83)   | 228 (15.15)   | 2.31 [1.00-5.33]            | 2.49 [0.87-7.15]            |
| <b>Early Preterm Birth</b>                                 |              |               |                             |                             |
| No                                                         | 123 (81.46)  | 1,287 (85.51) | 1.00 [referent]             | 1.00 [referent]             |
| Yes                                                        | 28 (18.54)   | 218 (14.49)   | 1.64 [0.59-4.57]            | 0.77 [0.23-2.57]            |
| <b>POBW &lt;15<sup>th</sup> Percentile</b>                 |              |               |                             |                             |
| No                                                         | 114 (75.5)   | 1,117 (74.22) | 1.00 [referent]             | 1.00 [referent]             |
| Yes                                                        | 23 (15.23)   | 194 (12.89)   | 1.51 [0.65-3.54]            | 1.65 [0.63-4.31]            |
| Unavailable                                                | 14 (9.27)    | 194 (12.89)   |                             |                             |
| <b>Parity</b>                                              |              |               |                             |                             |
| 0                                                          | 58 (38.41)   | 604 (40.13)   | 1.00 [referent]             | 1.00 [referent]             |
| 1                                                          | 49 (32.45)   | 534 (35.48)   | 1.06 [0.44-2.56]            | 0.83 [0.23-3.00]            |
| ≥2                                                         | 44 (29.14)   | 367 (24.39)   | 1.73 [0.67-4.50]            | 1.84 [0.31-10.88]           |
| <b>Child</b>                                               |              |               |                             |                             |
| <b>Sex</b>                                                 |              |               |                             |                             |
| Female                                                     | 51 (33.77)   | 799 (53.09)   | 1.00 [referent]             | 1.00 [referent]             |
| Male                                                       | 100 (66.23)  | 706 (46.91)   | <b>5.21 [2.58-10.52]***</b> | <b>5.42 [2.42-12.14]***</b> |
| <b>Ethnicity</b>                                           |              |               |                             |                             |
| Other                                                      | 137 (90.73)  | 1,435 (95.35) | 1.00 [referent]             | 1.00 [referent]             |
| Indigenous Australian                                      | 14 (9.27)    | 70 (4.65)     | 3.96 [0.86-18.29]           | 2.74 [0.40-18.97]           |
| <b>Child Speaks Language Other Than English at Home</b>    |              |               |                             |                             |
| No                                                         | 139 (92.05)  | 1,377 (91.50) | 1.00 [referent]             | 1.00 [referent]             |
| Yes                                                        | 12 (7.95)    | 128 (8.50)    | 0.67 [0.17-2.62]            | 1.02 [0.22-4.71]            |
| <b>Age Category at Time of AEDC Completion<sup>b</sup></b> |              |               |                             |                             |
| 1                                                          | 40 (26.49)   | 281 (18.67)   | 2.42 [0.98-5.94]            | <b>2.83 [1.04-7.66]*</b>    |
| 2                                                          | 98 (64.9)    | 1,101 (73.16) | 1.00 [referent]             | 1.00 [referent]             |
| 3                                                          | 13 (8.61)    | 123 (8.17)    | 1.73 [0.46-6.48]            | 0.59 [0.11-3.13]            |
| <b>Total Number of Siblings</b>                            |              |               |                             |                             |
| 1                                                          | 41 (27.15)   | 467 (31.03)   | 1.00 [referent]             | 1.00 [referent]             |
| 2                                                          | 57 (37.75)   | 597 (39.67)   | 1.27 [0.50-3.23]            | 1.78 [0.46-6.81]            |
| 3                                                          | 27 (17.88)   | 287 (19.07)   | 1.27 [0.41-3.91]            | 0.83 [0.14-4.80]            |
| >3                                                         | 26 (17.22)   | 154 (10.23)   | <b>4.06 [1.14-14.39]*</b>   | 2.35 [0.30-18.43]           |
| <b>Sociodemographic</b>                                    |              |               |                             |                             |
| <b>Index of Relative Socioeconomic Disadvantage</b>        |              |               |                             |                             |
| Lowest Quintile                                            | 118 (78.15)  | 1,255 (83.39) | 1.67 [0.59-4.74]            | 0.67 [0.20-2.31]            |
| > Lowest Quintile                                          | 26 (17.22)   | 211 (14.02)   | 1.00 [referent]             | 1.00 [referent]             |



|             |          |           |  |  |
|-------------|----------|-----------|--|--|
| Unavailable | 7 (4.64) | 39 (2.59) |  |  |
|-------------|----------|-----------|--|--|

\*p<0.05, \*\*p<0.01, \*\*\*p<0.001

<sup>a</sup> Excluded from multivariable analysis due to small N.

<sup>b</sup> Age categories classified as; ≥3 years 10 months to <5 years and one month, 2) ≥5 years and one month to <5 years and 10 months (reference category), 3) ≥5 years and 10 months to <6 years 10 months.

For peer review only

Table 3. Risk Factors for Developmental Vulnerability on the Emotional Maturity Domain.

| Characteristic                                            | DV<br>(N=147)<br>N (%) | NDV<br>(N=1,509)<br>N (%) | Bivariate<br>OR [95% CI]    | Multivariable<br>(N=1,352)<br>aOR [95% CI] |
|-----------------------------------------------------------|------------------------|---------------------------|-----------------------------|--------------------------------------------|
| <b>Maternal</b>                                           |                        |                           |                             |                                            |
| <b>Age at Time of Child's Birth</b>                       |                        |                           |                             |                                            |
| ≤20 years                                                 | 22 (14.97)             | 60 (3.98)                 | <b>7.09 [2.58-19.51]***</b> | 2.65 [0.67-10.48]                          |
| 21-25 years                                               | 19 (12.93)             | 185 (12.26)               | 1.18 [0.50-2.78]            | 0.98 [0.36-2.70]                           |
| 26-30 years                                               | 34 (23.13)             | 400 (26.51)               | 1.00 [referent]             | 1.00 [referent]                            |
| 31-35 years                                               | 44 (29.93)             | 554 (36.71)               | 0.89 [0.46-1.71]            | 0.95 [0.43-2.11]                           |
| 36-40 years                                               | 23 (15.65)             | 267 (17.69)               | 1.02 [0.47-2.23]            | 0.92 [0.35-2.43]                           |
| >40 years                                                 | 5 (3.40)               | 43 (2.85)                 | 1.32 [0.29-5.90]            | 0.42 [0.05-3.69]                           |
| <b>Marital Status</b>                                     |                        |                           |                             |                                            |
| Married (inc. de facto)                                   | 111 (75.51)            | 1,369 (90.72)             | 1.00 [referent]             | 1.00 [referent]                            |
| All Other                                                 | 34 (23.13)             | 136 (9.01)                | <b>4.58 [2.26-9.27]***</b>  | <b>3.25 [1.28-8.27]*</b>                   |
| Unavailable                                               | 2 (1.36)               | 4 (0.27)                  |                             |                                            |
| <b>Occupational Status Scale at Time of Child's Birth</b> |                        |                           |                             |                                            |
| 0-20                                                      | 45 (30.61)             | 264 (17.50)               | 1.80 [0.85-3.82]            | 0.97 [0.36-2.64]                           |
| >20-40                                                    | 34 (23.13)             | 353 (23.39)               | 0.88 [0.41-1.87]            | 0.60 [0.24-1.53]                           |
| >40-60                                                    | 22 (14.97)             | 387 (25.65)               | 0.45 [0.20-1.02]            | 0.34 [0.13-0.90]                           |
| >60-80                                                    | 11 (7.48)              | 188 (12.46)               | 0.49 [0.18-1.30]            | 0.23 [0.06-0.90]                           |
| >80-100                                                   | 28 (19.05)             | 262 (17.36)               | 1.00 [referent]             | 1.00 [referent]                            |
| Unavailable                                               | 7 (4.76)               | 55 (3.64)                 |                             |                                            |
| <b>Pregnancy &amp; Birth</b>                              |                        |                           |                             |                                            |
| <b>Fertility Treatments</b>                               |                        |                           |                             |                                            |
| No                                                        | 126 (85.71)            | 1,262 (83.63)             | 1.00 [referent]             | 1.00 [referent]                            |
| Yes                                                       | 21 (14.29)             | 247 (16.37)               | 0.81 [0.40-1.66]            | 1.10 [0.44-2.73]                           |
| <b>Smoking Status During Pregnancy</b>                    |                        |                           |                             |                                            |
| No                                                        | 118 (80.27)            | 1,300 (86.15)             | 1.00 [referent]             | 1.00 [referent]                            |
| Yes                                                       | 29 (19.73)             | 209 (13.85)               | 1.70 [0.86-3.36]            | 0.85 [0.34-2.11]                           |
| <b>Pre-eclampsia</b>                                      |                        |                           |                             |                                            |
| No                                                        | 129 (87.76)            | 1,331 (88.20)             | 1.00 [referent]             | 1.00 [referent]                            |
| Yes                                                       | 18 (12.24)             | 178 (11.80)               | 1.09 [0.50-2.40]            | 1.96 [0.79-4.86]                           |
| <b>Gestational Diabetes</b>                               |                        |                           |                             |                                            |
| No                                                        | 138 (93.88)            | 1,416 (93.84)             | 1.00 [referent]             | 1.00 [referent]                            |
| Yes                                                       | 9 (6.12)               | 93 (6.16)                 | 1.02 [0.35-2.97]            | 1.35 [0.43-4.28]                           |
| <b>Threatened Abortion</b>                                |                        |                           |                             |                                            |
| No                                                        | 140 (95.24)            | 1,432 (94.90)             | 1.00 [referent]             | 1.00 [referent]                            |
| Yes                                                       | 7 (4.76)               | 77 (5.10)                 | 0.91 [0.28-3.03]            | 0.08 [0.01-1.03]                           |
| <b>Other Pregnancy Related Complications</b>              |                        |                           |                             |                                            |
| No                                                        | 35 (23.81)             | 541 (35.85)               | 1.00 [referent]             | 1.00 [referent]                            |
| Yes                                                       | 112 (76.19)            | 968 (64.15)               | <b>2.13 [1.20-3.80]*</b>    | 1.87 [0.89-3.92]                           |
| <b>Threatened Preterm Labour</b>                          |                        |                           |                             |                                            |
| No                                                        | 125 (85.03)            | 1,339 (88.73)             | 1.00 [referent]             | 1.00 [referent]                            |
| Yes                                                       | 22 (14.97)             | 170 (11.27)               | 1.52 [0.72-3.25]            | 1.14 [0.48-2.69]                           |
| <b>APH</b>                                                |                        |                           |                             |                                            |
| No                                                        | 139 (94.56)            | 1,459 (96.69)             | 1.00 [referent]             | 1.00 [referent]                            |
| Yes                                                       | 8 (5.44)               | 50 (3.31)                 | 2.13 [0.62-7.31]            | 0.64 [0.13-3.20]                           |
| <b>Placenta Praevia<sup>a</sup></b>                       |                        |                           |                             |                                            |
| No                                                        | 146 (99.32)            | 1,500 (99.40)             |                             |                                            |
| Yes                                                       | 1 (0.68)               | 9 (0.60)                  |                             |                                            |
| <b>Placental Abruption<sup>a</sup></b>                    |                        |                           |                             |                                            |
| No                                                        | 145 (98.64)            | 1,505 (99.73)             |                             |                                            |
| Yes                                                       | 2 (1.36)               | 4 (0.27)                  |                             |                                            |
| <b>Fetal Distress</b>                                     |                        |                           |                             |                                            |
| No                                                        | 128 (87.07)            | 1,390 (92.11)             | 1.00 [referent]             | 1.00 [referent]                            |

|                                                            |              |               |                              |                             |
|------------------------------------------------------------|--------------|---------------|------------------------------|-----------------------------|
| Yes                                                        | 19 (12.93)   | 119 (7.89)    | 1.95 [0.86-4.44]             | 1.02 [0.38-2.74]            |
| <b>Cephalopelvic Disproportion<sup>a</sup></b>             |              |               |                              |                             |
| No                                                         | 147 (100.00) | 1,505 (99.73) |                              |                             |
| Yes                                                        | 0 (0.00)     | 4 (0.27)      |                              |                             |
| <b>Prolapsed Cord<sup>a</sup></b>                          |              |               |                              |                             |
| No                                                         | 145 (98.64)  | 1,498 (99.27) |                              |                             |
| Yes                                                        | 2 (1.36)     | 11 (0.73)     |                              |                             |
| <b>Precipitate Delivery<sup>a</sup></b>                    |              |               |                              |                             |
| No                                                         | 146 (99.32)  | 1,484 (98.34) |                              |                             |
| Yes                                                        | 1 (0.68)     | 25 (1.66)     |                              |                             |
| <b>PPH ≥500mls</b>                                         |              |               |                              |                             |
| No                                                         | 95 (64.63)   | 1,104 (73.16) | 1.00 [referent]              | 1.00 [referent]             |
| Yes                                                        | 52 (35.37)   | 405 (26.84)   | <b>1.75 [1.01-3.05]*</b>     | 1.00 [0.51-1.97]            |
| <b>TSR ≥2mins</b>                                          |              |               |                              |                             |
| No                                                         | 119 (80.95)  | 1,305 (86.48) | 1.00 [referent]              | 1.00 [referent]             |
| Yes                                                        | 28 (19.05)   | 204 (13.52)   | 1.69 [0.91-3.15]             | 1.12 [0.46-2.70]            |
| <b>Apgar 5-minutes &lt;7<sup>a</sup></b>                   |              |               |                              |                             |
| No                                                         | 143 (97.28)  | 1,480 (98.08) |                              |                             |
| Yes                                                        | 4 (2.72)     | 29 (1.92)     |                              |                             |
| <b>Intubation</b>                                          |              |               |                              |                             |
| No                                                         | 114 (77.55)  | 1,275 (84.49) | 1.00 [referent]              | 1.00 [referent]             |
| Yes                                                        | 33 (22.45)   | 234 (15.51)   | 1.78 [0.98-3.21]             | 1.44 [0.62-3.35]            |
| <b>Early Preterm Birth</b>                                 |              |               |                              |                             |
| No                                                         | 119 (80.95)  | 1,291 (85.55) | 1.00 [referent]              | 1.00 [referent]             |
| Yes                                                        | 28 (19.05)   | 218 (14.45)   | 1.51 [0.76-3.00]             | 1.01 [0.45-2.27]            |
| <b>POBW &lt;15<sup>th</sup> Percentile</b>                 |              |               |                              |                             |
| No                                                         | 106 (72.11)  | 1,125 (74.55) | 1.00 [referent]              | 1.00 [referent]             |
| Yes                                                        | 24 (16.33)   | 193 (12.79)   | 1.48 [0.76-2.87]             | 1.64 [0.79-3.41]            |
| Unavailable                                                | 17 (11.56)   | 191 (12.66)   |                              |                             |
| <b>Parity</b>                                              |              |               |                              |                             |
| 0                                                          | 61 (41.5)    | 601 (39.83)   | 1.00 [referent]              | 1.00 [referent]             |
| 1                                                          | 52 (35.37)   | 531 (35.19)   | 0.99 [0.55-1.78]             | 0.92 [0.39-2.20]            |
| ≥2                                                         | 34 (23.13)   | 377 (24.98)   | 0.89 [0.46-1.72]             | 0.89 [0.25-3.14]            |
| <b>Child</b>                                               |              |               |                              |                             |
| <b>Sex</b>                                                 |              |               |                              |                             |
| Female                                                     | 32 (21.77)   | 818 (54.21)   | 1.00 [referent]              | 1.00 [referent]             |
| Male                                                       | 115 (78.23)  | 691 (45.79)   | <b>10.13 [4.94-20.79]***</b> | <b>9.63 [4.53-20.45]***</b> |
| <b>Ethnicity</b>                                           |              |               |                              |                             |
| Other                                                      | 131 (89.12)  | 1,441 (95.49) | 1.00 [referent]              | 1.00 [referent]             |
| Indigenous Australian                                      | 16 (10.88)   | 68 (4.51)     | <b>3.62 [1.36-9.62]*</b>     | <b>5.91 [1.55-22.54]**</b>  |
| <b>Child Speaks Language Other Than English at Home</b>    |              |               |                              |                             |
| No                                                         | 135 (91.84)  | 1,381 (91.52) | 1.00 [referent]              | 1.00 [referent]             |
| Yes                                                        | 12 (8.16)    | 128 (8.48)    | 1.00 [0.40-2.49]             | 0.86 [0.29-2.56]            |
| <b>Age Category at Time of AEDC Completion<sup>b</sup></b> |              |               |                              |                             |
| 1                                                          | 37 (25.17)   | 284 (18.82)   | 1.57 [0.85-2.90]             | 1.39 [0.69-2.81]            |
| 2                                                          | 102 (69.39)  | 1,097 (72.7)  | 1.00 [referent]              | 1.00 [referent]             |
| 3                                                          | 8 (5.44)     | 128 (8.48)    | 0.62 [0.22-1.77]             | 0.34 [0.09-1.24]            |
| <b>Total Number of Siblings</b>                            |              |               |                              |                             |
| 1                                                          | 45 (30.61)   | 463 (30.68)   | 1.00 [referent]              | 1.00 [referent]             |
| 2                                                          | 59 (40.14)   | 595 (39.43)   | 1.05 [0.57-1.95]             | 1.38 [0.56-3.41]            |
| 3                                                          | 22 (14.97)   | 292 (19.35)   | 0.71 [0.32-1.57]             | 0.83 [0.24-2.80]            |
| >3                                                         | 21 (14.29)   | 159 (10.54)   | 1.62 [0.69-3.80]             | 1.72 [0.41-7.26]            |
| <b>Sociodemographic</b>                                    |              |               |                              |                             |
| <b>Index of Relative Socioeconomic Disadvantage</b>        |              |               |                              |                             |
| Lowest Quintile                                            | 118 (80.27)  | 1,255 (83.17) | 1.08 [0.54-2.17]             | 0.56 [0.23-1.36]            |
| > Lowest Quintile                                          | 22 (14.97)   | 215 (14.25)   | 1.00 [referent]              | 1.00 [referent]             |

|             |          |           |  |  |
|-------------|----------|-----------|--|--|
| Unavailable | 7 (4.76) | 39 (2.58) |  |  |
|-------------|----------|-----------|--|--|

\*p<0.05, \*\*p<0.01, \*\*\*p<0.001

<sup>a</sup> Excluded from multivariable analysis due to small N.

<sup>b</sup> Age categories classified as; ≥3 years 10 months to <5 years and one month, 2) ≥5 years and one month to <5 years and 10 months (reference category), 3) ≥5 years and 10 months to <6 years 10 months.

For peer review only

Table 4. Risk Factors for Developmental Vulnerability on the Language &amp; Cognitive Skills (school-based) Domain.

| Characteristic                                            | DV<br>(N=195)<br>N (%) | NDV<br>(N=1,461)<br>N (%) | Bivariate<br>OR [95% CI]       | Multivariable<br>(N=1,352)<br>aOR [95% CI] |
|-----------------------------------------------------------|------------------------|---------------------------|--------------------------------|--------------------------------------------|
| <b>Maternal</b>                                           |                        |                           |                                |                                            |
| <b>Age at Time of Child's Birth</b>                       |                        |                           |                                |                                            |
| ≤20 years                                                 | 34 (17.44)             | 48 (3.29)                 | <b>77.73 [13.95-433.08]***</b> | <b>50.23 [5.53-456.36]***</b>              |
| 21-25 years                                               | 41 (21.03)             | 163 (11.16)               | <b>7.00 [1.97-24.87]***</b>    | <b>5.29 [1.25-22.34]*</b>                  |
| 26-30 years                                               | 38 (19.49)             | 396 (27.10)               | 1.00 [referent]                | 1.00 [referent]                            |
| 31-35 years                                               | 53 (27.18)             | 545 (37.30)               | 1.07 [0.39-2.96]               | 1.32 [0.40-4.32]                           |
| 36-40 years                                               | 20 (10.26)             | 270 (18.48)               | 0.65 [0.19-2.30]               | 0.98 [0.23-4.28]                           |
| >40 years                                                 | 9 (4.62)               | 39 (2.67)                 | 5.98 [0.72-49.99]              | 6.45 [0.53-79.03]                          |
| <b>Marital Status</b>                                     |                        |                           |                                |                                            |
| Married (inc. de facto)                                   | 145 (74.36)            | 1,335 (91.38)             | 1.00 [referent]                | 1.00 [referent]                            |
| All Other                                                 | 50 (25.64)             | 120 (8.21)                | <b>18.44 [5.70-59.63]***</b>   | <b>4.65 [1.13-19.18]*</b>                  |
| Unavailable                                               | 0 (0.00)               | 6 (0.41)                  |                                |                                            |
| <b>Occupational Status Scale at Time of Child's Birth</b> |                        |                           |                                |                                            |
| 0-20                                                      | 70 (35.90)             | 239 (16.36)               | <b>10.48 [2.85-38.53]***</b>   | 2.48 [0.55-11.3]                           |
| >20-40                                                    | 48 (24.62)             | 339 (23.20)               | 2.30 [0.67-7.93]               | 1.26 [0.31-5.17]                           |
| >40-60                                                    | 24 (12.31)             | 385 (26.35)               | 0.43 [0.11-1.60]               | 0.41 [0.09-1.79]                           |
| >60-80                                                    | 7 (3.59)               | 192 (13.14)               | 0.19 [0.03-1.17]               | 0.20 [0.02-1.69]                           |
| >80-100                                                   | 26 (13.33)             | 264 (18.07)               | 1.00 [referent]                | 1.00 [referent]                            |
| Unavailable                                               | 20 (10.26)             | 42 (2.87)                 |                                |                                            |
| <b>Pregnancy &amp; Birth</b>                              |                        |                           |                                |                                            |
| <b>Fertility Treatments</b>                               |                        |                           |                                |                                            |
| No                                                        | 180 (92.31)            | 1,208 (82.68)             | 1.00 [referent]                | 1.00 [referent]                            |
| Yes                                                       | 15 (7.69)              | 253 (17.32)               | 0.16 [0.04-0.55]               | 0.40 [0.08-1.89]                           |
| <b>Smoking Status During Pregnancy</b>                    |                        |                           |                                |                                            |
| No                                                        | 145 (74.36)            | 1,273 (87.13)             | 1.00 [referent]                | 1.00 [referent]                            |
| Yes                                                       | 50 (25.64)             | 188 (12.87)               | <b>6.35 [2.24-18.01]***</b>    | 0.30 [0.08-1.18]                           |
| <b>Pre-eclampsia</b>                                      |                        |                           |                                |                                            |
| No                                                        | 176 (90.26)            | 1,284 (87.89)             | 1.00 [referent]                | 1.00 [referent]                            |
| Yes                                                       | 19 (9.74)              | 177 (12.11)               | 0.61 [0.18-2.10]               | 1.15 [0.27-4.79]                           |
| <b>Gestational Diabetes</b>                               |                        |                           |                                |                                            |
| No                                                        | 184 (94.36)            | 1,370 (93.77)             | 1.00 [referent]                | 1.00 [referent]                            |
| Yes                                                       | 11 (5.64)              | 91 (6.23)                 | 0.84 [0.16-4.44]               | 0.75 [0.13-4.46]                           |
| <b>Threatened Abortion</b>                                |                        |                           |                                |                                            |
| No                                                        | 189 (96.92)            | 1,383 (94.66)             | 1.00 [referent]                | 1.00 [referent]                            |
| Yes                                                       | 6 (3.08)               | 78 (5.34)                 | 0.36 [0.05-2.41]               | 0.17 [0.01-3.21]                           |
| <b>Other Pregnancy Related Complications</b>              |                        |                           |                                |                                            |
| No                                                        | 53 (27.18)             | 523 (35.80)               | 1.00 [referent]                | 1.00 [referent]                            |
| Yes                                                       | 142 (72.82)            | 938 (64.20)               | 1.96 [0.84-4.54]               | 1.37 [0.48-3.91]                           |
| <b>Threatened Preterm Labour</b>                          |                        |                           |                                |                                            |
| No                                                        | 162 (83.08)            | 1,302 (89.12)             | 1.00 [referent]                | 1.00 [referent]                            |
| Yes                                                       | 33 (16.92)             | 159 (10.88)               | 3.21 [0.80-12.92]              | 1.43 [0.39-5.32]                           |
| <b>APH</b>                                                |                        |                           |                                |                                            |
| No                                                        | 183 (93.85)            | 1,415 (96.85)             | 1.00 [referent]                | 1.00 [referent]                            |
| Yes                                                       | 12 (6.15)              | 46 (3.15)                 | 6.80 [0.62-74.13]              | 5.55 [0.71-43.47]                          |
| <b>Placenta Praevia</b>                                   |                        |                           |                                |                                            |
| No                                                        | 195 (100.00)           | 1,451 (99.32)             |                                |                                            |
| Yes                                                       | 0 (0.00)               | 10 (0.68)                 |                                |                                            |
| <b>Placental Abruption</b>                                |                        |                           |                                |                                            |
| No                                                        | 195 (100.00)           | 1,455 (99.59)             |                                |                                            |
| Yes                                                       | 0 (0.00)               | 6 (0.41)                  |                                |                                            |
| <b>Fetal Distress</b>                                     |                        |                           |                                |                                            |

|                                                            |              |               |                               |                            |
|------------------------------------------------------------|--------------|---------------|-------------------------------|----------------------------|
| No                                                         | 173 (88.72)  | 1,345 (92.06) | 1.00 [referent]               | 1.00 [referent]            |
| Yes                                                        | 22 (11.28)   | 116 (7.94)    | 2.04 [0.45-9.17]              | 0.63 [0.13-3.10]           |
| <b>Cephalopelvic Disproportion<sup>a</sup></b>             |              |               |                               |                            |
| No                                                         | 195 (100.00) | 1,457 (99.73) |                               |                            |
| Yes                                                        | 0 (0.00)     | 4 (0.27)      |                               |                            |
| <b>Prolapsed Cord<sup>a</sup></b>                          |              |               |                               |                            |
| No                                                         | 192 (98.46)  | 1,451 (99.32) |                               |                            |
| Yes                                                        | 3 (1.54)     | 10 (0.68)     |                               |                            |
| <b>Precipitate Delivery<sup>a</sup></b>                    |              |               |                               |                            |
| No                                                         | 190 (97.44)  | 1,440 (98.56) |                               |                            |
| Yes                                                        | 5 (2.56)     | 21 (1.44)     |                               |                            |
| <b>PPH ≥500mls</b>                                         |              |               |                               |                            |
| No                                                         | 123 (63.08)  | 1076 (73.65)  | 1.00 [referent]               | 1.00 [referent]            |
| Yes                                                        | 72 (36.92)   | 385 (26.35)   | <b>3.13 [1.22-8.05]*</b>      | 1.72 [0.64-4.64]           |
| <b>TSR ≥2mins</b>                                          |              |               |                               |                            |
| No                                                         | 163 (83.59)  | 1,261 (86.31) | 1.00 [referent]               | 1.00 [referent]            |
| Yes                                                        | 32 (16.41)   | 200 (13.69)   | 0.95 [0.39-2.30]              | 0.60 [0.20-1.84]           |
| <b>Apgar 5-minutes &lt;7<sup>a</sup></b>                   |              |               |                               |                            |
| No                                                         | 193 (98.97)  | 1,430 (97.88) |                               |                            |
| Yes                                                        | 2 (1.03)     | 31 (2.12)     |                               |                            |
| <b>Intubation</b>                                          |              |               |                               |                            |
| No                                                         | 159 (81.54)  | 1,230 (84.19) | 1.00 [referent]               | 1.00 [referent]            |
| Yes                                                        | 36 (18.46)   | 231 (15.81)   | 1.13 [0.49-2.58]              | 1.46 [0.51-4.13]           |
| <b>Early Preterm Birth</b>                                 |              |               |                               |                            |
| No                                                         | 155 (79.49)  | 1,255 (85.90) | 1.00 [referent]               | 1.00 [referent]            |
| Yes                                                        | 40 (20.51)   | 206 (14.10)   | 2.57 [0.75-8.80]              | 0.75 [0.21-2.68]           |
| <b>POBW &lt;15<sup>th</sup> Percentile</b>                 |              |               |                               |                            |
| No                                                         | 142 (72.82)  | 1,089 (74.54) | 1.00 [referent]               | 1.00 [referent]            |
| Yes                                                        | 36 (18.46)   | 181 (12.39)   | 1.62 [0.72-3.66]              | 1.74 [0.71-4.26]           |
| Unavailable                                                | 17 (8.72)    | 191 (13.07)   |                               |                            |
| <b>Parity</b>                                              |              |               |                               |                            |
| 0                                                          | 51 (26.15)   | 611 (41.82)   | 1.00 [referent]               | 1.00 [referent]            |
| 1                                                          | 81 (41.54)   | 502 (34.36)   | <b>4.67 [1.71-12.70]**</b>    | <b>6.24 [1.46-26.73]*</b>  |
| ≥2                                                         | 63 (32.31)   | 348 (23.82)   | <b>6.18 [2.09-18.27]**</b>    | 6.25 [0.96-40.69]          |
| <b>Child</b>                                               |              |               |                               |                            |
| <b>Sex</b>                                                 |              |               |                               |                            |
| Female                                                     | 85 (43.59)   | 765 (52.36)   | 1.00 [referent]               | 1.00 [referent]            |
| Male                                                       | 110 (56.41)  | 696 (47.64)   | <b>3.03 [1.60-5.71]***</b>    | <b>3.57 [1.70-7.49]***</b> |
| <b>Ethnicity</b>                                           |              |               |                               |                            |
| Other                                                      | 165 (84.62)  | 1,407 (96.30) | 1.00 [referent]               | 1.00 [referent]            |
| Indigenous Australian                                      | 30 (15.38)   | 54 (3.70)     | <b>34.27 [7.49-156.82]***</b> | 2.08 [0.30-14.36]          |
| <b>Child Speaks Language Other Than English at Home</b>    |              |               |                               |                            |
| No                                                         | 167 (85.64)  | 1,349 (92.33) | 1.00 [referent]               | 1.00 [referent]            |
| Yes                                                        | 28 (14.36)   | 112 (7.67)    | 3.82 [0.89-16.47]             | 1.59 [0.37-6.87]           |
| <b>Age Category at Time of AEDC Completion<sup>b</sup></b> |              |               |                               |                            |
| 1                                                          | 48 (24.62)   | 273 (18.69)   | 2.09 [0.74-5.89]              | 1.98 [0.71-5.53]           |
| 2                                                          | 128 (65.64)  | 1,071 (73.31) | 1.00 [referent]               | 1.00 [referent]            |
| 3                                                          | 19 (9.74)    | 117 (8.01)    | 2.56 [0.56-11.82]             | 1.21 [0.25-5.84]           |
| <b>Total Number of Siblings</b>                            |              |               |                               |                            |
| 1                                                          | 41 (21.03)   | 467 (31.96)   | 1.00 [referent]               | 1.00 [referent]            |
| 2                                                          | 79 (40.51)   | 575 (39.36)   | <b>2.82 [1.01-7.88]*</b>      | 0.40 [0.09-1.73]           |
| 3                                                          | 35 (17.95)   | 279 (19.10)   | 2.40 [0.71-8.13]              | 0.18 [0.03-1.11]           |
| >3                                                         | 40 (20.51)   | 140 (9.58)    | <b>17.34 [4.37-68.74]***</b>  | 1.83 [0.25-13.51]          |
| <b>Sociodemographic</b>                                    |              |               |                               |                            |
| <b>Index of Relative Socioeconomic Disadvantage</b>        |              |               |                               |                            |
| Lowest Quintile                                            | 141 (72.31)  | 1,232 (84.33) | <b>6.87 [1.80-26.28]**</b>    | 1.25 [0.39-4.03]           |

|                   |            |             |                 |                 |
|-------------------|------------|-------------|-----------------|-----------------|
| > Lowest Quintile | 46 (23.59) | 191 (13.07) | 1.00 [referent] | 1.00 [referent] |
| Unavailable       | 8 (4.10)   | 38 (2.60)   |                 |                 |

\*p<0.05, \*\*p<0.01, \*\*\*p<0.001

<sup>a</sup> Excluded from multivariable analysis due to small N.

<sup>b</sup> Age categories classified as; ≥3 years 10 months to <5 years and one month, 2) ≥5 years and one month to <5 years and 10 months (reference category), 3) ≥5 years and 10 months to <6 years 10 months.

For peer review only

Table 5. Risk Factors for Developmental Vulnerability on the Communication Skills &amp; General Knowledge Domain.

| Characteristic                                            | DV<br>(N=200)<br>N (%) | NDV<br>(N=1,456)<br>N (%) | Bivariate<br>OR [95% CI]      | Multivariable<br>(N=1,352)<br>aOR [95% CI] |
|-----------------------------------------------------------|------------------------|---------------------------|-------------------------------|--------------------------------------------|
| <b>Maternal</b>                                           |                        |                           |                               |                                            |
| <b>Age at Time of Child's Birth</b>                       |                        |                           |                               |                                            |
| ≤20 years                                                 | 30 (15.00)             | 52 (3.57)                 | <b>41.57 [7.10-243.32]***</b> | 3.51 [0.36-34.23]                          |
| 21-25 years                                               | 34 (17.00)             | 170 (11.68)               | 3.32 [0.87-12.70]             | 3.65 [0.83-16.03]                          |
| 26-30 years                                               | 46 (23.00)             | 388 (26.65)               | 1.00 [referent]               | 1.00 [referent]                            |
| 31-35 years                                               | 60 (30.00)             | 538 (36.95)               | 0.81 [0.28-2.38]              | 1.77 [0.51-6.05]                           |
| 36-40 years                                               | 22 (11.00)             | 268 (18.41)               | 0.49 [0.13-1.84]              | 1.54 [0.34-7.09]                           |
| >40 years                                                 | 8 (4.00)               | 40 (2.75)                 | 2.98 [0.29-31.20]             | 6.24 [0.39-100.11]                         |
| <b>Marital Status</b>                                     |                        |                           |                               |                                            |
| Married (inc. de facto)                                   | 160 (80.00)            | 1,320 (90.66)             | 1.00 [referent]               | 1.00 [referent]                            |
| All Other                                                 | 40 (20.00)             | 130 (8.93)                | <b>14.40 [2.74-75.72]***</b>  | 2.24 [0.50-9.97]                           |
| Unavailable                                               | 0 (0.00)               | 6 (0.41)                  |                               |                                            |
| <b>Occupational Status Scale at Time of Child's Birth</b> |                        |                           |                               |                                            |
| 0-20                                                      | 68 (34.00)             | 241 (16.55)               | <b>24.18 [5.14-113.78]***</b> | 5.54 [1.00-30.80]                          |
| >20-40                                                    | 65 (32.50)             | 322 (22.12)               | <b>11.01 [2.55-47.62]**</b>   | <b>6.60 [1.33-32.64]*</b>                  |
| >40-60                                                    | 21 (10.50)             | 388 (26.65)               | 0.68 [0.16-2.99]              | 0.63 [0.12-3.34]                           |
| >60-80                                                    | 12 (6.00)              | 187 (12.84)               | 0.83 [0.14-4.79]              | 1.00 [0.13-7.32]                           |
| >80-100                                                   | 19 (9.50)              | 271 (18.61)               | 1.00 [referent]               | 1.00 [referent]                            |
| Unavailable                                               | 15 (7.50)              | 47 (3.23)                 |                               |                                            |
| <b>Pregnancy &amp; Birth</b>                              |                        |                           |                               |                                            |
| <b>Fertility Treatments</b>                               |                        |                           |                               |                                            |
| No                                                        | 188 (94.00)            | 1,200 (82.42)             | 1.00 [referent]               | 1.00 [referent]                            |
| Yes                                                       | 12 (6.00)              | 256 (17.58)               | 0.10 [0.02-0.39]              | 0.29 [0.06-1.48]                           |
| <b>Smoking Status During Pregnancy</b>                    |                        |                           |                               |                                            |
| No                                                        | 148 (74.00)            | 1,270 (87.23)             | 1.00 [referent]               | 1.00 [referent]                            |
| Yes                                                       | 52 (26.00)             | 186 (12.77)               | <b>7.79 [2.61-23.28]***</b>   | 1.49 [0.41-5.32]                           |
| <b>Pre-eclampsia</b>                                      |                        |                           |                               |                                            |
| No                                                        | 175 (87.50)            | 1,285 (88.26)             | 1.00 [referent]               | 1.00 [referent]                            |
| Yes                                                       | 25 (12.50)             | 171 (11.74)               | 1.07 [0.29-3.90]              | 1.11 [0.26-4.88]                           |
| <b>Gestational Diabetes</b>                               |                        |                           |                               |                                            |
| No                                                        | 187 (93.50)            | 1,367 (93.89)             | 1.00 [referent]               | 1.00 [referent]                            |
| Yes                                                       | 13 (6.50)              | 89 (6.11)                 | 1.16 [0.20-6.72]              | 1.23 [0.20-7.42]                           |
| <b>Threatened Abortion</b>                                |                        |                           |                               |                                            |
| No                                                        | 192 (96.00)            | 1,380 (94.78)             | 1.00 [referent]               | 1.00 [referent]                            |
| Yes                                                       | 8 (4.00)               | 76 (5.22)                 | 0.55 [0.09-3.48]              | 0.27 [0.02-4.28]                           |
| <b>Other Pregnancy Related Complications</b>              |                        |                           |                               |                                            |
| No                                                        | 51 (25.50)             | 525 (36.06)               | 1.00 [referent]               | 1.00 [referent]                            |
| Yes                                                       | 149 (74.50)            | 931 (63.94)               | <b>2.53 [1.07-6.00]*</b>      | 1.50 [0.49-4.57]                           |
| <b>Threatened Preterm Labour</b>                          |                        |                           |                               |                                            |
| No                                                        | 178 (89.00)            | 1,286 (88.32)             | 1.00 [referent]               | 1.00 [referent]                            |
| Yes                                                       | 22 (11.00)             | 170 (11.68)               | 1.00 [0.27-3.61]              | 0.54 [0.13-2.27]                           |
| <b>APH</b>                                                |                        |                           |                               |                                            |
| No                                                        | 188 (94.00)            | 1,410 (96.84)             | 1.00 [referent]               | 1.00 [referent]                            |
| Yes                                                       | 12 (6.00)              | 46 (3.16)                 | 9.09 [0.70-117.63]            | 1.17 [0.12-11.45]                          |
| <b>Placenta Praevia <sup>a</sup></b>                      |                        |                           |                               |                                            |
| No                                                        | 200 (100.00)           | 1,446 (99.31)             |                               |                                            |
| Yes                                                       | 0 (0.00)               | 10 (0.69)                 |                               |                                            |
| <b>Placental Abruption <sup>a</sup></b>                   |                        |                           |                               |                                            |
| No                                                        | 199 (99.50)            | 1,451 (99.66)             |                               |                                            |
| Yes                                                       | 1 (0.50)               | 5 (0.34)                  |                               |                                            |
| <b>Fetal Distress</b>                                     |                        |                           |                               |                                            |



|                                                            |              |               |                              |                              |
|------------------------------------------------------------|--------------|---------------|------------------------------|------------------------------|
| No                                                         | 172 (86.00)  | 1,346 (92.45) | 1.00 [referent]              | 1.00 [referent]              |
| Yes                                                        | 28 (14.00)   | 110 (7.55)    | 4.73 [1.00-22.38]            | 2.73 [0.64-11.65]            |
| <b>Cephalopelvic Disproportion<sup>a</sup></b>             |              |               |                              |                              |
| No                                                         | 200 (100.00) | 1,452 (99.73) |                              |                              |
| Yes                                                        | 0 (0.00)     | 4 (0.27)      |                              |                              |
| <b>Prolapsed Cord<sup>a</sup></b>                          |              |               |                              |                              |
| No                                                         | 200 (100)    | 1,443 (99.11) |                              |                              |
| Yes                                                        | 0 (0.00)     | 13 (0.89)     |                              |                              |
| <b>Precipitate Delivery<sup>a</sup></b>                    |              |               |                              |                              |
| No                                                         | 195 (97.50)  | 1,435 (98.56) |                              |                              |
| Yes                                                        | 5 (2.50)     | 21 (1.44)     |                              |                              |
| <b>PPH ≥500mls</b>                                         |              |               |                              |                              |
| No                                                         | 122 (61.00)  | 1,077 (73.97) | 1.00 [referent]              | 1.00 [referent]              |
| Yes                                                        | 78 (39.00)   | 379 (26.03)   | <b>3.72 [1.41-9.86]**</b>    | 2.22 [0.79-6.23]             |
| <b>TSR ≥2mins</b>                                          |              |               |                              |                              |
| No                                                         | 163 (81.50)  | 1,261 (86.61) | 1.00 [referent]              | 1.00 [referent]              |
| Yes                                                        | 37 (18.50)   | 195 (13.39)   | <b>2.80 [1.08-7.22]*</b>     | 1.45 [0.47-4.45]             |
| <b>Apgar 5-minutes &lt;7<sup>a</sup></b>                   |              |               |                              |                              |
| No                                                         | 198 (99.00)  | 1,425 (97.87) |                              |                              |
| Yes                                                        | 2 (1.00)     | 31 (2.13)     |                              |                              |
| <b>Intubation</b>                                          |              |               |                              |                              |
| No                                                         | 162 (81.00)  | 1,227 (84.27) | 1.00 [referent]              | 1.00 [referent]              |
| Yes                                                        | 38 (19.00)   | 229 (15.73)   | 1.91 [0.80-4.56]             | 1.27 [0.44-3.71]             |
| <b>Early Preterm Birth</b>                                 |              |               |                              |                              |
| No                                                         | 157 (78.50)  | 1,253 (86.06) | 1.00 [referent]              | 1.00 [referent]              |
| Yes                                                        | 43 (21.50)   | 203 (13.94)   | 3.73 [0.99-14.09]            | 1.95 [0.57-6.75]             |
| <b>POBW &lt;15<sup>th</sup> Percentile</b>                 |              |               |                              |                              |
| No                                                         | 146 (73.00)  | 1,085 (74.52) | 1.00 [referent]              | 1.00 [referent]              |
| Yes                                                        | 36 (18.00)   | 181 (12.43)   | 1.83 [0.78-4.33]             | 1.74 [0.71-4.29]             |
| Unavailable                                                | 18 (9.00)    | 190 (13.05)   |                              |                              |
| <b>Parity</b>                                              |              |               |                              |                              |
| 0                                                          | 65 (32.50)   | 597 (41.00)   | 1.00 [referent]              | 1.00 [referent]              |
| 1                                                          | 68 (34.00)   | 515 (35.37)   | 1.51 [0.59-3.86]             | 1.26 [0.30-5.35]             |
| ≥2                                                         | 67 (33.50)   | 344 (23.63)   | <b>4.54 [1.47-14.09]**</b>   | 1.48 [0.23-9.64]             |
| <b>Child</b>                                               |              |               |                              |                              |
| <b>Sex</b>                                                 |              |               |                              |                              |
| Female                                                     | 87 (43.50)   | 763 (52.40)   | 1.00 [referent]              | 1.00 [referent]              |
| Male                                                       | 113 (56.50)  | 693 (47.60)   | <b>3.00 [1.56-5.79]**</b>    | <b>3.25 [1.50-7.03]**</b>    |
| <b>Ethnicity</b>                                           |              |               |                              |                              |
| Other                                                      | 179 (89.50)  | 1,393 (95.67) | 1.00 [referent]              | 1.00 [referent]              |
| Indigenous Australian                                      | 21 (10.50)   | 63 (4.33)     | <b>21.66 [2.34-200.50]**</b> | 1.06 [0.13-8.59]             |
| <b>Child Speaks Language Other Than English at Home</b>    |              |               |                              |                              |
| No                                                         | 161 (80.50)  | 1,355 (93.06) | 1.00 [referent]              | 1.00 [referent]              |
| Yes                                                        | 39 (19.50)   | 101 (6.94)    | <b>11.16 [3.30-37.77]***</b> | <b>15.16 [3.57-64.30]***</b> |
| <b>Age Category at Time of AEDC Completion<sup>b</sup></b> |              |               |                              |                              |
| 1                                                          | 57 (28.5)    | 264 (18.13)   | <b>5.60 [1.73-18.09]**</b>   | <b>5.11 [1.71-15.30]**</b>   |
| 2                                                          | 125 (62.5)   | 1074 (73.76)  | 1.00 [referent]              | 1.00 [referent]              |
| 3                                                          | 18 (9)       | 118 (8.1)     | 1.91 [0.44-8.30]             | 1.63 [0.31-8.57]             |
| <b>Total Number of Siblings</b>                            |              |               |                              |                              |
| 1                                                          | 49 (24.50)   | 459 (31.52)   | 1.00 [referent]              | 1.00 [referent]              |
| 2                                                          | 77 (38.50)   | 577 (39.63)   | 1.54 [0.58-4.13]             | 0.89 [0.20-3.94]             |
| 3                                                          | 37 (18.50)   | 277 (19.02)   | 1.64 [0.49-5.44]             | 1.07 [0.17-6.68]             |
| >3                                                         | 37 (18.50)   | 143 (9.82)    | <b>15.85 [2.91-86.42]**</b>  | 4.07 [0.48-34.74]            |
| <b>Sociodemographic</b>                                    |              |               |                              |                              |
| <b>Index of Relative Socioeconomic Disadvantage</b>        |              |               |                              |                              |
| Lowest Quintile                                            | 153 (76.50)  | 1,220 (83.79) | <b>4.24 [1.12-16.03]*</b>    | 0.69 [0.20-2.44]             |

|                   |            |             |                 |                 |
|-------------------|------------|-------------|-----------------|-----------------|
| > Lowest Quintile | 42 (21.00) | 195 (13.39) | 1.00 [referent] | 1.00 [referent] |
| Unavailable       | 5 (2.50)   | 41 (2.82)   |                 |                 |

\*p<0.05, \*\*p<0.01, \*\*\*p<0.001

<sup>a</sup> Excluded from multivariable analysis due to small N.

<sup>b</sup> Age categories classified as; ≥3 years 10 months to <5 years and one month, 2) ≥5 years and one month to <5 years and 10 months (reference category), 3) ≥5 years and 10 months to <6 years 10 months.

For peer review only

**STROBE 2007 (v4) Statement—Checklist of items that should be included in reports of *cohort studies***

| Section/Topic                | Item # | Recommendation                                                                                                                                                                       | Reported on page # |
|------------------------------|--------|--------------------------------------------------------------------------------------------------------------------------------------------------------------------------------------|--------------------|
| <b>Title and abstract</b>    | 1      | (a) Indicate the study's design with a commonly used term in the title or the abstract                                                                                               | 3                  |
|                              |        | (b) Provide in the abstract an informative and balanced summary of what was done and what was found                                                                                  | 3                  |
| <b>Introduction</b>          |        |                                                                                                                                                                                      |                    |
| Background/rationale         | 2      | Explain the scientific background and rationale for the investigation being reported                                                                                                 | 5                  |
| Objectives                   | 3      | State specific objectives, including any prespecified hypotheses                                                                                                                     | 6                  |
| <b>Methods</b>               |        |                                                                                                                                                                                      |                    |
| Study design                 | 4      | Present key elements of study design early in the paper                                                                                                                              | 3                  |
| Setting                      | 5      | Describe the setting, locations, and relevant dates, including periods of recruitment, exposure, follow-up, and data collection                                                      |                    |
| Participants                 | 6      | (a) Give the eligibility criteria, and the sources and methods of selection of participants. Describe methods of follow-up                                                           | 7                  |
|                              |        | (b) For matched studies, give matching criteria and number of exposed and unexposed                                                                                                  | n/a                |
| Variables                    | 7      | Clearly define all outcomes, exposures, predictors, potential confounders, and effect modifiers. Give diagnostic criteria, if applicable                                             | 7-10               |
| Data sources/<br>measurement | 8*     | For each variable of interest, give sources of data and details of methods of assessment (measurement). Describe comparability of assessment methods if there is more than one group | 7-10               |
| Bias                         | 9      | Describe any efforts to address potential sources of bias                                                                                                                            | 7-10               |
| Study size                   | 10     | Explain how the study size was arrived at                                                                                                                                            | 7                  |
| Quantitative variables       | 11     | Explain how quantitative variables were handled in the analyses. If applicable, describe which groupings were chosen and why                                                         | 7-10               |
| Statistical methods          | 12     | (a) Describe all statistical methods, including those used to control for confounding                                                                                                | 10                 |
|                              |        | (b) Describe any methods used to examine subgroups and interactions                                                                                                                  | 10                 |
|                              |        | (c) Explain how missing data were addressed                                                                                                                                          | 10                 |
|                              |        | (d) If applicable, explain how loss to follow-up was addressed                                                                                                                       | 10                 |
|                              |        | (e) Describe any sensitivity analyses                                                                                                                                                | 10                 |
| <b>Results</b>               |        |                                                                                                                                                                                      |                    |

|                          |     |                                                                                                                                                                                                                                                                                                                                                                                                               |                       |
|--------------------------|-----|---------------------------------------------------------------------------------------------------------------------------------------------------------------------------------------------------------------------------------------------------------------------------------------------------------------------------------------------------------------------------------------------------------------|-----------------------|
| Participants             | 13* | (a) Report numbers of individuals at each stage of study—eg numbers potentially eligible, examined for eligibility, confirmed eligible, included in the study, completing follow-up, and analysed<br>(b) Give reasons for non-participation at each stage<br>(c) Consider use of a flow diagram                                                                                                               | 10-11                 |
| Descriptive data         | 14* | (a) Give characteristics of study participants (eg demographic, clinical, social) and information on exposures and potential confounders<br>(b) Indicate number of participants with missing data for each variable of interest<br>(c) Summarise follow-up time (eg, average and total amount)                                                                                                                | 10-11                 |
| Outcome data             | 15* | Report numbers of outcome events or summary measures over time                                                                                                                                                                                                                                                                                                                                                |                       |
| Main results             | 16  | (a) Give unadjusted estimates and, if applicable, confounder-adjusted estimates and their precision (eg, 95% confidence interval). Make clear which confounders were adjusted for and why they were included<br>(b) Report category boundaries when continuous variables were categorized<br>(c) If relevant, consider translating estimates of relative risk into absolute risk for a meaningful time period | 10-11<br>10-11<br>N/A |
| Other analyses           | 17  | Report other analyses done—eg analyses of subgroups and interactions, and sensitivity analyses                                                                                                                                                                                                                                                                                                                | N/A                   |
| <b>Discussion</b>        |     |                                                                                                                                                                                                                                                                                                                                                                                                               |                       |
| Key results              | 18  | Summarise key results with reference to study objectives                                                                                                                                                                                                                                                                                                                                                      | 12                    |
| <b>Limitations</b>       |     |                                                                                                                                                                                                                                                                                                                                                                                                               |                       |
| Interpretation           | 20  | Give a cautious overall interpretation of results considering objectives, limitations, multiplicity of analyses, results from similar studies, and other relevant evidence                                                                                                                                                                                                                                    | 4                     |
| Generalisability         | 21  | Discuss the generalisability (external validity) of the study results                                                                                                                                                                                                                                                                                                                                         | 15                    |
| <b>Other information</b> |     |                                                                                                                                                                                                                                                                                                                                                                                                               |                       |
| Funding                  | 22  | Give the source of funding and the role of the funders for the present study and, if applicable, for the original study on which the present article is based                                                                                                                                                                                                                                                 | 17                    |

\*Give information separately for cases and controls in case-control studies and, if applicable, for exposed and unexposed groups in cohort and cross-sectional studies.

**Note:** An Explanation and Elaboration article discusses each checklist item and gives methodological background and published examples of transparent reporting. The STROBE checklist is best used in conjunction with this article (freely available on the Web sites of PLoS Medicine at <http://www.plosmedicine.org/>, Annals of Internal Medicine at <http://www.annals.org/>, and Epidemiology at <http://www.epidem.com/>). Information on the STROBE Initiative is available at [www.strobe-statement.org](http://www.strobe-statement.org).

# BMJ Open

## The associations between biological and sociodemographic risks for developmental vulnerability in twins at age five: A population data linkage study in Western Australia.

|                                 |                                                                                                                                                                                                                                                                                                                                                                                                                              |
|---------------------------------|------------------------------------------------------------------------------------------------------------------------------------------------------------------------------------------------------------------------------------------------------------------------------------------------------------------------------------------------------------------------------------------------------------------------------|
| Journal:                        | <i>BMJ Open</i>                                                                                                                                                                                                                                                                                                                                                                                                              |
| Manuscript ID                   | bmjopen-2020-038846.R1                                                                                                                                                                                                                                                                                                                                                                                                       |
| Article Type:                   | Original research                                                                                                                                                                                                                                                                                                                                                                                                            |
| Date Submitted by the Author:   | 02-Jul-2020                                                                                                                                                                                                                                                                                                                                                                                                                  |
| Complete List of Authors:       | Dhamrait, Gursimran; Telethon Kids Institute, ; The University of Western Australia Faculty of Health and Medical Sciences, School of Population and Global Health<br>Christensen, Daniel; Telethon Kids Institute; The University of Western Australia<br>Pereira, G.F; Telethon Kids Institute; Curtin University, School of Public Health<br>Taylor, Catherine; Telethon Kids Institute; University of Western Australia, |
| <b>Primary Subject Heading</b>: | Paediatrics                                                                                                                                                                                                                                                                                                                                                                                                                  |
| Secondary Subject Heading:      | Public health, Epidemiology                                                                                                                                                                                                                                                                                                                                                                                                  |
| Keywords:                       | EPIDEMIOLOGY, PAEDIATRICS, PUBLIC HEALTH                                                                                                                                                                                                                                                                                                                                                                                     |
|                                 |                                                                                                                                                                                                                                                                                                                                                                                                                              |

SCHOLARONE™  
Manuscripts



I, the Submitting Author has the right to grant and does grant on behalf of all authors of the Work (as defined in the below author licence), an exclusive licence and/or a non-exclusive licence for contributions from authors who are: i) UK Crown employees; ii) where BMJ has agreed a CC-BY licence shall apply, and/or iii) in accordance with the terms applicable for US Federal Government officers or employees acting as part of their official duties; on a worldwide, perpetual, irrevocable, royalty-free basis to BMJ Publishing Group Ltd ("BMJ") its licensees and where the relevant Journal is co-owned by BMJ to the co-owners of the Journal, to publish the Work in this journal and any other BMJ products and to exploit all rights, as set out in our [licence](#).

The Submitting Author accepts and understands that any supply made under these terms is made by BMJ to the Submitting Author unless you are acting as an employee on behalf of your employer or a postgraduate student of an affiliated institution which is paying any applicable article publishing charge ("APC") for Open Access articles. Where the Submitting Author wishes to make the Work available on an Open Access basis (and intends to pay the relevant APC), the terms of reuse of such Open Access shall be governed by a Creative Commons licence – details of these licences and which [Creative Commons](#) licence will apply to this Work are set out in our licence referred to above.

Other than as permitted in any relevant BMJ Author's Self Archiving Policies, I confirm this Work has not been accepted for publication elsewhere, is not being considered for publication elsewhere and does not duplicate material already published. I confirm all authors consent to publication of this Work and authorise the granting of this licence.

## **Manuscript**

**Title:** The associations between biological and sociodemographic risks for developmental vulnerability in twins at age five: A population data linkage study in Western Australia.

Gursimran K. Dhamrait,<sup>1,2</sup> Daniel Christensen,<sup>1,3</sup> Gavin Pereira<sup>1,4,5</sup> and Catherine L. Taylor.<sup>1,3</sup>

<sup>1</sup>Telethon Kids Institute, Nedlands, Western Australia, Australia.

<sup>2</sup>School of Population and Global Health, The University of Western Australia, Nedlands, Western Australia, Australia.

<sup>3</sup>Centre for Child Health Research, The University of Western Australia, Nedlands, Western Australia, Australia.

<sup>4</sup>School of Public Health, Curtin University, Perth, Australia.

<sup>5</sup>Centre for Fertility and Health (CeFH), Norwegian Institute of Public Health, Oslo, Norway.

### **Address correspondence to:**

Gursimran K. Dhamrait

Telethon Kids Institute

15 Hospital Avenue, Nedlands, Western Australia, Australia.

Phone: 61+ 8 9489 1183

Fax: 61+ 8 9489 7700

Email: [gursimran.dhamrait@telethonkids.org.au](mailto:gursimran.dhamrait@telethonkids.org.au)

**Main Body Word Count:** 4,181 words

**Abstract Word Count:** 300 words

**Short Title:** Developmental vulnerability in twins at age five

### **Abbreviations**

AEDC: Australian Early Development Census

ARIA: Accessibility and Remoteness Index of Australia

AUSEI06: Australian Socioeconomic Index 2006

DV1: Developmentally Vulnerable on one or more Australian Early Development Census domains

DV2: Developmentally Vulnerable on two or more Australian Early Development Census domains

CI: Confidence Interval

IRSD: Index of Relative Socioeconomic Disadvantage

- 1 37 MNS: Midwives Notifications System
- 2
- 3 38 OR: Odds Ratio
- 4
- 5 39 POBW: Proportion of Optimal Birthweight
- 6
- 7 40 WA: Western Australia

8 41

9

10 42 **Keywords (max of 5):**

11

12 43 Twins, Australian Early Development Census, Child Development, Record Linkage.

13  
14  
15  
16  
17  
18  
19  
20  
21  
22  
23  
24  
25  
26  
27  
28  
29  
30  
31  
32  
33  
34  
35  
36  
37  
38  
39  
40  
41  
42  
43  
44  
45  
46  
47  
48  
49  
50  
51  
52  
53  
54  
55  
56  
57  
58  
59  
60

For peer review only



## Abstract

Objective: To investigate the prevalence of, and associations between, prenatal and perinatal risk factors and developmental vulnerability in twins at age five.

Design: Retrospective cohort study using bivariate and multivariable logistic regression.

Setting: Western Australia (WA), 2002-2015.

Participants: 828 twin pairs born in WA with an Australian Early Development Census (AEDC) record from 2009, 2012 or 2015.

Main Outcome Measures: The AEDC is a national measure of child development across five domains. Children with scores <10<sup>th</sup> percentile were classified as developmentally vulnerable on, one or more domains (DV1), or two or more domains (DV2).

Results: In this population, 26.0% twins were classified as DV1 and 14.1% as DV2. In the multivariable model, risk factors for DV1 were; maternal age <25 years (OR 7.06, 95% CI 2.29-21.76), child speaking a language other than English at home (OR 6.45, 95% CI 2.17-19.17), male child (OR 5.08, 95% CI: 2.89-8.92), age younger than the reference category for the study sample ( $\geq 5$  years one month to <5 years 10 months) at time of AEDC completion (OR 3.34, 95% CI: 1.55-7.22), and having a proportion of optimal birthweight (POBW) <15<sup>th</sup> percentile of the study sample (OR 2.06, 95% CI 1.07-3.98). Risk factors for DV2 were; male child (OR 7.87, 95% CI: 3.45-17.97), maternal age <25 years (OR 5.60, 95% CI: 1.30-24.10), age younger than the reference category (OR 5.36, 95% CI: 1.94-14.82), child speaking a language other than English at home (OR 4.65, 95% CI: 1.14-19.03), mother's marital status as not married at the time of twins' birth (OR 4.59, 95% CI: 1.13-18.55), maternal occupation status in the lowest quintile (OR 3.30, 95% CI: 1.11-9.81) and having a POBW <15<sup>th</sup> (OR 3.11, 95% CI: 1.26-7.64).

Conclusion: Both biological and sociodemographic risk factors are associated with developmental vulnerability in twins at five years of age.

## Article Summary

### Strengths and Limitations

- The study is based on a large population-level sample of 1,656 twins.
- This is the first twin study to assess developmental vulnerabilities in an otherwise healthy sample of Australian twins, at the time of their first year of full-time school.
- Bivariate and multivariable logistic regression analysis with the calculation of adjusted odds ratios was performed to explore the associations between a large range of prenatal and perinatal risk factors.
- Twin pairs for which data was complete were used for the analysis.
- The datasets used in this study did not report on twin zygosity nor on complications of pregnancy that are specific to multiple pregnancies (e.g., twin reversed arterial perfusion, twin-twin transfusion syndrome).

## Introduction

The increased use of assisted reproductive technologies and increasing maternal age at conception have attributed to a significant increase in the number of multifetal pregnancies around the world.<sup>1</sup> Multifetal pregnancies are classified as high risk pregnancies and are associated with higher rates of pregnancy complications and adverse neonatal and perinatal outcomes, compared to singleton pregnancies.<sup>2-6</sup> The majority of the literature assessing higher order pregnancies has focused primarily on birth outcomes, including preterm birth,<sup>7</sup> low birth weight,<sup>3</sup> and developmental disabilities such as cerebral palsy.<sup>8</sup> Studies that have assessed longer-term developmental outcomes of twins have focused on developmental outcomes around the age of two years.<sup>9</sup> Such studies have reported that twins had poorer performance, in comparison to singletons, on a range of domains including; communication, gross and fine motor skills, problem solving, personal-social skills, and language development.<sup>10,11</sup> Furthermore, most studies examining child development outcomes at school starting age have focused on singleton children, from a single family and have compared children across families.<sup>12</sup> There is a paucity of research on the developmental vulnerability of multifetal pregnancies such as twins, around the time that they commence formal education.

Child development outcomes can vary significantly based on numerous factors including the child's personal characteristics, such as personal dispositions and abilities, social constructs and the environments, both intrauterine and extrauterine, in which they develop.<sup>13-16</sup> Studies that have assessed cognitive and school performance outcomes at the age of five have reported that children who are born preterm,<sup>17-24</sup> with a low birth weight,<sup>25-28</sup> are small for gestational age,<sup>29,30</sup> and male<sup>31-34</sup> are more likely to have poorer developmental outcomes. In comparison to singletons, twins are more likely to be classified as preterm<sup>35</sup> or low birth weight, and have fetal growth restriction.<sup>36</sup> Studies have reported that twins are more likely to have poorer neurodevelopmental outcomes compared to singletons, even after controlling for gestational age and birthweight.<sup>37</sup> A study reported that twins scored lower than singletons in both the Verbal and Performance IQ domains of the Wechsler Preschool and Primary Scale of Intelligence, at the ages of four and five years.<sup>38</sup> Likewise, twin studies have also reported sex differences, with girls scoring higher than boys at ages four and five

1 107 years.<sup>38</sup> The cumulative nature of school-based learning means that developmental gaps at school  
2  
3  
4 108 entry, are difficult to close over time.<sup>39</sup> Children who begin school with poor school readiness often  
5  
6 109 struggle to catch up with their peers and tend to fall further behind as they progress through the  
7  
8 110 subsequent years of schooling.<sup>39</sup> As the educational achievement trajectories are largely established by  
9  
10  
11 111 7 years of age (year 3) children with poor school readiness are more likely to have lower later-life  
12  
13 112 educational achievement.<sup>40</sup> Given the higher rates of pregnancy, neonatal and perinatal adversities  
14  
15 113 observed in twins in comparison to singletons, twins are particularly at risk for developmental delays  
16  
17 114 in the early childhood period.  
18  
19  
20 115 Twin studies, assessing the contribution of genes and the environment, have supported the hypothesis  
21  
22 116 that both factors impact child development.<sup>41-44</sup> Yet, a number of studies have reported no significant  
23  
24 117 differences in child development outcomes based on zygosity.<sup>38,45,46</sup> Sociodemographic factors such  
25  
26 118 as low socioeconomic status and low levels of parental education, have also been identified to  
27  
28  
29 119 adversely impact child development outcomes.<sup>47-49</sup> A study conducted in younger twins (assessed at  
30  
31 120 age 6, 12 and 18 months) reported that biological factors including low birth weight, were associated  
32  
33 121 with poorer early cognitive and non-cognitive, independently of environmental factors, such as  
34  
35  
36 122 socioeconomic status.<sup>3</sup> Alternatively, a study reported that the environmental factors shared by twins  
37  
38 123 of the same family, were more significantly associated with early language skills and school readiness  
39  
40 124 in twins at the age of five years, in comparison to genetic factors.<sup>45</sup> Overall, studies assessing both  
41  
42  
43 125 biological and sociodemographic factors and their impact on the longer-term child development of  
44  
45 126 children born from multiple pregnancies remain sparse and the results of the existing studies are  
46  
47 127 mixed.

49  
50 128 The aim of this study was to examine the prevalence of, and the association between, biological and  
51  
52 129 sociodemographic risk factors and developmental vulnerability in twins in their first year of full-time  
53  
54 130 school.

## 56 131 **Methods**

### 58 132 **Data Sources and Study Population**

#### 60 133 **Data Sources**

1 134 This study used anonymised individual-level data from the Midwives Notification System (MNS),  
2  
3  
4 135 which is statutory record of all births (still- or live-born) in WA with either a birthweight >400 grams  
5  
6 136 and/or a final gestational length of  $\geq 20$  weeks. Variables from MNS were cross validated with  
7  
8 137 corresponding records from WA Birth Registrations. Australian Early Development Census (AEDC)  
9  
10  
11 138 records were obtained for all available years (2009, 2012 and 2015) for all children with WA birth and  
12  
13 139 perinatal records. WA Register for Developmental Anomalies (WARDA) records were used to  
14  
15 140 identify children who had a diagnosed developmental disability between birth and age five years.  
16  
17 141 Statistical linkage of all records, by matching identifiers (e.g. name, address, date of birth etc.)  
18  
19  
20 142 common to sets of records,<sup>50</sup> was provided by the WA Data Linkage Branch from the Department of  
21  
22 143 Health WA.

#### 24 144 **Patient and Public Involvement**

26  
27 145 No patients were involved in the development of the research question or the outcome measures, or in  
28  
29 146 the development of the plans for the design or implementation of the study.  
30

#### 31 147 **Study Population**

33  
34 148 The study population included all children born in WA with an AEDC record in either 2009, 2012 or  
35  
36 149 2015 (N=73,903). Children were excluded from the study if; 1) they were not from a twin birth  
37  
38 150 (N=71,748), 2) they were identified by their teacher as having 'special-needs' based on a diagnosed  
39  
40 151 physical and/or intellectual disability (N=123), 3) they were reported as having any birth defect in the  
41  
42 152 WARDA datasets (N=119), 4) they had an AEDC score that was either incomplete or missing  
43  
44  
45 153 (N=22), or 5) their twin sibling was excluded based on the aforementioned exclusion criteria (N=235;  
46  
47 154 Figure 1). The final study sample consisted of N=1,656 children; N=828 twin pairs. There were 252  
48  
49  
50 155 opposite sex twin pairs and 576 same sex twin pairs (277 male and 299 female twin pairs).  
51

#### 52 156 **Outcome Measure**

54 157 The AEDC is a national census of early childhood development spanning five developmental  
55  
56 158 domains; 1) Physical Health and Wellbeing, 2) Social Competence, 3) Emotional Maturity, 4)  
57  
58  
59 159 Language and Cognitive skills (school-based), and 5) Communication Skills and General Knowledge.  
60  
160 The AEDC is conducted every three years, with the first national data collection conducted in 2009.

1 161 Children with scores <10<sup>th</sup> percentile in a given domain are classified as ‘developmentally  
2  
3  
4 162 vulnerable.’ AEDC cut-off scores are based on the first national AEDC data collection in 2009 and  
5  
6 163 apply to all AEDC data collections. Domain scores for children with special needs are not included in  
7  
8 164 the AEDC results. Two outcomes measures were used; developmentally vulnerable on one or more  
9  
10 165 AEDC domains (DV1) and developmentally vulnerable on two or more AEDC domains (DV2).

## 13 66 **Risk Variables**

### 15 67 **Maternal Variables**

17 168 Maternal age and marital status at child’s birth were obtained from the MNS and Birth Registrations.  
18  
19  
20 169 Maternal occupation at birth was obtained from Birth Registrations data and converted to a four-digit  
21  
22 170 standard code using the Australian and New Zealand Standard Classification of Occupations. These  
23  
24 171 codes were then assigned a value ranging from 0-100 using the Australian Socioeconomic Index 2006  
25  
26 172 (AUSEI06).<sup>51</sup> Low AUSEI06 values are representative of low-status occupations and high values  
27  
28  
29 173 represent high-status occupations. This variable was collapsed into two categories; most  
30  
31 174 disadvantaged quintile (i.e. AUSEI06 [0-20]) and greater than the most disadvantaged quintile (i.e.  
32  
33 175 AUSEI06 >20). An AUSEI06 value of zero was assigned to records if occupation was reported as  
34  
35  
36 176 ‘unemployed’, ‘stay at home parent’ or ‘pensioner.’ For records where maternal occupation was not  
37  
38 177 stated, an AUSEI06 value was not assigned and these cases were reported as missing.

### 40 178 **Pregnancy and Birth Variables**

42  
43 179 We included several binary pregnancy and birth variables to indicate either the presence or absence;  
44  
45 180 of fertility treatments, smoking during pregnancy, pre-eclampsia, gestational diabetes, threatened  
46  
47 181 abortion, threatened preterm labour, antepartum haemorrhage (APH), placenta praevia, placental  
48  
49 182 abruption, fetal distress, cephalopelvic disproportion, prolapsed cord, precipitate delivery, post-partum  
50  
51  
52 183 haemorrhage (PPH), intubation status, early preterm birth (<34 weeks of gestational age), and time to  
53  
54 184 Spontaneous Respiration (TSR); with a TSR of  $\geq 2$  minutes forming the ‘at risk’ group and five-  
55  
56 185 minute Apgar score; with a five-minute Apgar score of <7 forming the ‘at risk’ group.

58  
59 186 The proportion of optimal birthweight (POBW) is a measure of fetal growth and is defined as birth  
60  
187 weight divided by expected birth weight, in the absence of pathologic risk factors. This measure also

1 188 accounts for non-pathologic determinants of growth, including gestational age, birth order, sex of the  
2  
3  
4 189 child and maternal height<sup>52</sup> and has been validated against ultrasound measurements.<sup>53</sup> We derived a  
5  
6 190 binary proxy for fetal growth restriction as POBW <15<sup>th</sup> percentile, which corresponded to an  
7  
8 191 observed birth weight less than 75.75% of that expected.<sup>9</sup>

10  
11 192 We derived a general category for other pregnancy related complications (not elsewhere stated; such  
12  
13 193 as urinary tract infection, pre-labour rupture of membranes) for all records. As records may have  
14  
15 194 multiple pregnancy related complications, all records that had a complication that was not elsewhere  
16  
17 195 stated in this study or had multiple complications of which at least one complication was not  
18  
19  
20 196 elsewhere stated in this study, formed the 'at risk' group for this variable.

### 21 22 197 **Child Variables**

23  
24 198 Sex and ethnicity of child was obtained from the MNS and Birth Registrations. Age at the time of  
25  
26  
27 199 AEDC completion and language other than English spoken at home by the child were obtained from  
28  
29 200 the AEDC. Age of children at the time of AEDC completion ranged between;  $\geq 3$  years 10 months to  
30  
31 201 <6 years 10 months, with a mean of age category of,  $\geq 5$  years one month to 5 years 10 months. To  
32  
33  
34 202 balance frequencies, the age of children at the time of AEDC completion was categorised into three  
35  
36 203 groups; 1)  $\geq 3$  years 10 months to <5 years and one month, 2)  $\geq 5$  years one month to <5 years 10  
37  
38 204 months (reference category) and 3)  $\geq 5$  years 10 months to <6 years 10 months.

40  
41 205 The total number of siblings were derived as the number of live births to each mother prior to the year  
42  
43 206 that the cohort child had the AEDC conducted. Siblings who died within the neonatal period (i.e.  
44  
45 207 mode of separation post-birth from the hospital was death) were excluded in the calculations for total  
46  
47  
48 208 number of siblings.

### 49 50 209 **Sociodemographic Variables**

51  
52 210 The Index of Relative Socioeconomic Disadvantage (IRSD)<sup>19</sup> was calculated using the residential  
53  
54  
55 211 address at the time of birth. IRSD is derived from Australian Census data and reflects area-level  
56  
57 212 disadvantage through variables such as low household income, low educational attainment and high  
58  
59 213 levels of unemployment. This variable was collapsed into two groups; most disadvantaged quintile  
60  
214 (i.e. IRSD quintile 1) and greater than the most disadvantaged quintile (i.e. IRSD quintiles 2-5).



## Statistical Modelling

For each risk variable, the 'least risk' category (e.g. not early preterm birth) was used as the reference category (Table 1). To estimate the risk of a child being classified as DV1 and DV2, a generalised linear mixed model with a logit link function was used with a random intercept for each twin pair. A total of 30 maternal, pregnancy, birth, child and sociodemographic risk variables were considered for the multivariable models. For DV1, DV2, and each of the five AEDC domains, 24 risk variables were included in the multivariable models; six risk variables were excluded from multivariable analysis due to the prevalence being too small (total  $N < 50$  for a given category of a given variable). The variables excluded were; 1) placenta praevia, 2) placental abruption, 3) cephalopelvic disproportion, 4) prolapsed cord, 5) precipitate delivery and 6) a five-minute Apgar score of  $< 7$ . All variables were added simultaneously to the models. Odds ratios (OR) and the associated 95% confidence intervals (CIs) were estimated for both unadjusted and adjusted models. All analyses were undertaken using PROC GLIMMIX in SAS version 9.4 for Windows.<sup>54</sup>

## Results

### Prevalence of developmental vulnerability in twins

A total of 431 (26.0%) twins were classified as DV1 (Table 1). A total of 151 (18.2%) twin pairs had one twin identified as DV1 and 140 (16.9%) twin pairs had both twins identified as DV1. Of the 24 maternal, pregnancy and birth, child and sociodemographic risk variables considered in the multivariable models, five variables had a statistically significant association with an increased risk of a twin being classified as DV1. In order of decreasing magnitude of associated risk, the ORs were; maternal age of  $< 25$  younger at time of twins' birth (OR 7.06, 95% CI 2.29 to 21.76), child speaks language other than English at home (OR 6.45, 95% CI 2.17 to 19.17), male twins (OR 5.08, 95% CI 2.89 to 8.92), child's age younger than the reference category for the study sample ( $\geq 5$  years one month to 5 years 7 months) at time of AEDC completion (OR 3.34, 95% CI: 1.55 to 7.22), and POBW  $< 15^{\text{th}}$  percentile (OR 2.06, 95% CI 1.07 to 3.98).

A total of 223 (14.1%) twins were classified as DV2 (Table 2). In 95 (11.5%) twin pairs, one twin was identified as DV2 and in 64 twin pairs (7.9%), both twins were identified as DV2. Of the 24 maternal,



pregnancy and birth, child and sociodemographic risk variables considered in the adjusted models, seven variables had a statistically significant association with an increased risk of a twin being classified as DV2. Risk factors for DV2 were, in order of decreasing magnitude; male twins (OR 7.87, 95% CI: 3.45 to 17.97), maternal age of <25 younger at time of twins' birth (OR 5.60, 95% CI: 1.30 to 24.10), child's age younger than the reference category at time of AEDC completion (OR 5.36, 95% CI: 1.94 to 14.82), child speaking a language other than English at home (OR 4.65, 95% CI: 1.14 to 19.03), mother's marital status as not married at the time of twins' birth (OR 4.59, 95% CI: 1.13 to 18.55), maternal occupation status in the lowest quintile (OR 3.30, 95% CI: 1.11 to 9.81) and POBW <15<sup>th</sup> percentile (OR 3.11, 95% CI: 1.26 to 7.64).

### **Associations with domain-specific developmental vulnerability**

A total of, 188 (11.4%) children were classified as developmentally vulnerable for the domains of: Physical Health and Wellbeing; 151 (9.1%) for Social Competence; 147 (8.9%) for Emotional Maturity; 195 (11.8%) for Language and Cognitive Skills (school-based); and 200 (12.0%) for Communication Skills and General Knowledge (Supplementary Tables 1-5, respectively). These results were broadly consistent with the findings for the aggregate measures of developmental vulnerability (DV1 and DV2). All variables that were statistically significant in the aggregated measures of developmental vulnerability were statistically significant for the domains.

### **Discussion**

This study examined the associations between biological and sociodemographic risk factors and developmental vulnerability in twins in their first year of full-time school. To our knowledge, our study is the first of this scale (population-level sample of twins; N>1,600) to report on the prevalence of developmental vulnerabilities, in an otherwise healthy sample twins, at the time of their first year of full-time school. As studies have reported that twins are more likely to have poorer performance, in comparison to singletons, at the age of two<sup>10,11</sup> it was pertinent to assess if the prevalence rates of developmental vulnerabilities is higher in twins at age five. We reported that in the WA population, 26.0% of twins were classified as DV1 and 14.1% as DV2 across the 2009, 2012 and 2015 AEDC cycles. In the general WA population, which includes twins and higher order multiples, 23.0% of

1 269 children were classified as DV1 and 11.3% of children were classified as DV2, across these AEDC  
2  
3  
4 270 cycles.<sup>55</sup> A large cohort study of 99,530 singleton children from New South Wales reported that  
5  
6 271 20.8% were classified as DV1 across the 2009 and 2012 AEDC cycles.<sup>56</sup> Thus, we found that twins  
7  
8 272 are at an elevated risk of developmental vulnerability relative to a general population of children in  
9  
10  
11 273 the state of Western Australia and in a singleton population in New South Wales. This is consistent  
12  
13 274 with findings from a study of 142 twin pairs from the Louisville Twin Study, that reported twins  
14  
15 275 scored lower than singletons in both the Verbal and Performance IQ domains of the Wechsler  
16  
17 276 Preschool and Primary Scale of Intelligence at both four and five years of age.<sup>38</sup> As our results were  
18  
19  
20 277 obtained from a sample of twins without any diagnosed developmental disabilities, the higher  
21  
22 278 prevalence rates of twins being classified as DV1 and DV2 observed in our study, when compared to  
23  
24 279 the general Australian population, suggests that healthy twins are more likely to be classified as  
25  
26  
27 280 developmental vulnerable on AEDC domains at school starting age when compared to their singleton  
28  
29 281 counterparts.

30  
31 282 The biological factors associated with developmental vulnerability in twins were; male sex, fetal  
32  
33 283 growth restriction, and younger chronological age at the time of AEDC completion. These results are  
34  
35  
36 284 in line with singleton studies<sup>31,57</sup> which have reported that male children are more likely to be  
37  
38 285 classified as developmentally vulnerable in their first year of full-time school, in comparison to female  
39  
40 286 children. A study conducted in South Australia of 13,827 children, of which 3.4% were twins, also  
41  
42  
43 287 reported that male twins were more likely to be classified as DV2, when compared to female twins,  
44  
45 288 however this finding was not statistically significant.<sup>58</sup> The Louisville Twin Study also reported sex  
46  
47 289 differences, with females scoring higher on Full Scale, Verbal, and Performance IQ, than males at  
48  
49  
50 290 ages four and five years, however, scores tended to converge at six years of age.<sup>38</sup>

51  
52 291 We also reported that twins younger than the reference category for this sample were more likely to be  
53  
54 292 classified as developmentally vulnerable in their first year of full-time school. A study of 840  
55  
56 293 Canadian five-year old twins, aiming to assess the genetic and environmental factors influencing  
57  
58  
59 294 school readiness, reported that in the preliminary models age was positively correlated with the spatial  
60  
295 recognition, numbers, and the letters components of the Lollipop test.<sup>59</sup> Furthermore, a recent

1 296 discussion paper identified the need for further research to assess the effects of delaying school entry  
2  
3 297 for twins<sup>60</sup> thus, highlighting that further research is required to better understand if delaying school  
4  
5  
6 298 entry is beneficial for both short-term and long-term academic outcomes in twins.  
7

8 299 The sociodemographic risk factors associated with developmental vulnerability in twins included;  
9  
10 300 maternal age and occupational status, and a not married maternal marital status, at the time of twins'  
11  
12 301 birth, and the child speaking a language other than English at home. These results are supported by the  
13  
14 302 South Australian study, that examined a range of variables also included in our study.<sup>58</sup> This study  
15  
16 303 reported that maternal age, marital status and maternal occupation were associated with an increased  
17  
18 304 risk of children being classified as DV2 on the AEDC.<sup>58</sup> The South Australian study also reported that  
19  
20 305 parity and smoking during pregnancy were also associated with an increased risk of children being  
21  
22 306 classified as DV2.<sup>58</sup> In our study we observed an increased but insignificant association between these  
23  
24 307 risk variables and twins being classified as either DV1 or DV2.  
25  
26  
27  
28

29 308 An interesting finding from our study was that speaking a language other than English at home was  
30  
31 309 associated with an increased risk for twins being classified as DV1 and DV2. Previous studies have  
32  
33 310 reported that approximately a fifth of Australian children are bilingual,<sup>61</sup> and the prevalence of twins  
34  
35 311 speaking a language other than English at home in our study were in line with these results. Results  
36  
37 312 from a study of an Australia wide study of 261,147 children, singletons and multiples, from the 2009  
38  
39 313 AEDC cycle reported that bilingual children proficient in English have been reported to have equal or  
40  
41 314 slightly lower odds of being classed as DV1 when compared to their English-speaking background  
42  
43 315 peers.<sup>61</sup> However, unlike our study, this study<sup>61</sup> did not report differences in developmental  
44  
45 316 vulnerability based on plurality. Additionally, a Canadian study examining the school readiness  
46  
47 317 profiles of 95,537 children in British Columbia<sup>62</sup> reported that bilingualism was associated with  
48  
49 318 positive social, emotional and cognitive development, as measured by the Early Development Index.<sup>34</sup>  
50  
51 319 Differences in results may be attributed to the fact bilingualism may be a risk factor for twins  
52  
53 320 however, it may not be a significant risk factor in a general population sample. The language groups  
54  
55 321 most commonly spoken in WA after English (Mandarin, Italian and Vietnamese)<sup>63</sup> are different to  
56  
57  
58  
59  
60

1 322 those most prevalent in British Columbia (Punjabi, Chinese and German).<sup>64</sup> Thus, the difference in  
2  
3  
4 323 findings between the Canadian study and our results may be attributable to this fact.  
5  
6 324 Our findings have some accord with a cohort study examining the associations between biological and  
7  
8 325 sociodemographic risk factors on late language emergence in 473 twins pairs at the age of two years.<sup>9</sup>  
9  
10 326 Taylor et al. reported that the risk factors for late language emergence in twins, without developmental  
11  
12  
13 327 disabilities, include fetal growth restriction.<sup>9</sup> Interestingly, our study also identified fetal growth  
14  
15 328 restriction as a risk factor for developmental vulnerability at age five, suggesting that the biological  
16  
17 329 implications of a suboptimal intrauterine environment may be persist beyond infancy and into early  
18  
19  
20 330 childhood in twins who did not have diagnosed developmental disabilities. In contrast to our study,  
21  
22 331 the Taylor et al. twin sample excluded twins with exposure to languages other than English. Their  
23  
24 332 study found that sociodemographic risk factors (low maternal education, socioeconomic area  
25  
26 333 disadvantage) were not associated with late language emergence at age two years. Our results suggest  
27  
28  
29 334 that sociodemographic factors including, maternal; age, marital status and occupational status, at time  
30  
31 335 of twins' birth, and the child speaking a language other than English at home are also associated with  
32  
33 336 an increased risk of developmental vulnerability at age five.<sup>9</sup> The differences in findings between this  
34  
35  
36 337 study and our study suggest that sociodemographic characteristics may play a more significant role as  
37  
38 338 risk variables at age five years compared to at the age of two years. This hypothesis is supported by a  
39  
40 339 subsequent study of twins aged four years and six years, which reported that higher maternal  
41  
42  
43 340 education and older maternal age showed positive effects on language and non-verbal phenotypes.<sup>6</sup>  
44  
45 341 Furthermore, a study of a twin sample from the Quebec Newborn Twin Study, reported that  
46  
47 342 environmental factors, such as socioeconomic status, rather than genetic factors were attributable to  
48  
49  
50 343 the predictive association observed between early language skills and school readiness, as measured  
51  
52 344 by the Lollipop Test, in twins 63-months of age.<sup>45</sup> In our study, zygosity of twins could not be  
53  
54 345 established as WA administrative data does not contain information on zygosity. Furthermore, we did  
55  
56 346 not aim to assess the impact of within twin-pair discordance in regards to developmental  
57  
58  
59 347 vulnerabilities at age five. Thus, further research is required to better elucidate the impact and  
60

1 348 interplay of biological and sociodemographic risk variables at different stages of development in  
2  
3  
4 349 twins.  
5  
6 350 Studies assessing twin-singleton differences often control for or select for factors such as prematurity,  
7  
8 351 low birth weight, or parental socioeconomic status.<sup>57,65,66</sup> Our study however, draws attention to  
9  
10 352 adverse effects of other risk factors, including POBW and maternal marital status, on child  
11  
12  
13 353 development outcomes at age five. An Australian cohort study of 1,922 children from the Northern  
14  
15 354 Territory using linked administrative data, reported an increased, but non-significant, risk of twins  
16  
17 355 being classified as DV1 on the AEDC, after controlling for a range of biological and  
18  
19  
20 356 sociodemographic variables used in our study including; sex, 5-minute Apgar score <7, area  
21  
22 357 remoteness, ethnicity, child speaks a language other than English at home and maternal age at time of  
23  
24 358 child's birth.<sup>57</sup> Although this study gave consideration to plurality as a risk factor for developmental  
25  
26  
27 359 vulnerability, it did not aim to assess the association between a comprehensive set of biological and  
28  
29 360 sociodemographic risk factors. A Canadian study of 5-year old twins reported that shared  
30  
31  
32 361 environmental factors substantially accounted for cognitive school readiness (as measured by the  
33  
34 362 Lollipop Test) as compared to genetic effects.<sup>59</sup> Likewise other studies have also reported that a range  
35  
36 363 of family factors, which would be assumed to be shared by both twins, such as family income,  
37  
38 364 maternal occupation, and employment status are associated with cognitive school readiness.<sup>67,68</sup>  
39  
40 365 Further studies in this area are required, as the extent and nature of the risk factors associated with  
41  
42  
43 366 developmental vulnerability at age five in twins, remain not well-established.  
44  
45 367 Preventative intervention studies have reported that programs designed to improve school readiness  
46  
47 368 and high quality early childhood education and care, are effective for at-risk populations and can have  
48  
49  
50 369 significant long-term results.<sup>69,70</sup> The higher prevalence rates of DV1 and DV2 in twins observed in  
51  
52 370 this study are indicative of the fact that twins form an at-risk group in terms of developmental  
53  
54  
55 371 vulnerability at the time at which children commence full-time school. Therefore, it is pertinent for  
56  
57 372 those working in the early childhood education sector and for parents to be aware of the  
58  
59 373 developmental vulnerabilities present in twins at the age at which children begin full-time school. In  
60  
374 Australia, there has been call to provide increased quantity and quality of support service and

1 375 resources are required for twins and their families due to increased vulnerability<sup>60</sup> and the results of  
2  
3  
4 376 our study highlight this need.

### 5 6 377 **Conclusions**

7  
8 378 Both biological and sociodemographic risk factors are associated with developmental vulnerability at  
9  
10 379 the age of five in twins. The findings of our study suggest that twins are more likely to be classified as  
11  
12 380 developmentally vulnerable at school starting age when compared to their singleton counterparts. In  
13  
14 381 particular, the results draw attention to the hypothesis that prenatal and more significantly perinatal  
15  
16 382 risk factors and sociodemographic environments in which twins are raised can impact developmental  
17  
18 383 vulnerability in early childhood.  
19  
20  
21  
22  
23  
24  
25  
26  
27  
28  
29  
30  
31  
32  
33  
34  
35  
36  
37  
38  
39  
40  
41  
42  
43  
44  
45  
46  
47  
48  
49  
50  
51  
52  
53  
54  
55  
56  
57  
58  
59  
60

**Acknowledgements:**

We gratefully acknowledge the WA Data Linkage Branch and the data custodians who provided data for this study and the people of Western Australia for the use of their administrative data. This study does not necessarily reflect their views. This study uses data from the Australian Early Development Census (AEDC). The AEDC is funded by the Australian Government Department of Education and Training. The findings and views reported are those of the authors and should not be attributed to the Department or the Australian Government.

**Ethics Approval:**

Ethics approval for this study was granted by the Western Australian Department of Health Human Research Ethics Committee (2016/51) and the University of Western Australia Human Research Ethics Committee (RA/4/20/4776).

**Declaration of interests:**

The authors declare that they have no competing interests, no financial relationships with any organisations that might have an interest in the submitted work in the previous three years; no other relationships or activities that could appear to have influenced the submitted work.

**Funding:**

This study was supported by National Health and Medical Research Grants (GNT1173991 and GNT1099655 to GP), the Research Council of Norway through its Centres of Excellence funding scheme (#262700 to GP) and the Australian Research Council Centre of Excellence for Children and Families over the Life Course (CE140100027 to CLT and DC). GKD was supported by the ARC Centre of Excellence for Children and Families over the Life Course Scholarship, the ARC Centre of Excellence for Children and Families over the Life Course Top-Up Scholarship and the Stan and Jean Perron Top-Up Scholarship.

**Author Contributions:**

GKD: led study conceptualisation and design, conducted the literature review, performed data manipulation, analysis and interpretation of findings, drafted the initial manuscript and reviewed and revised the manuscript critically for important intellectual content.



1 411 DC, GP and CLT: contributed to the study inception, the development of the design, interpretation of  
2  
3  
4 412 the results, manuscript revisions, the interpretation of the results and revised the manuscript critically  
5  
6 413 for important intellectual content.

7  
8 414 GKD, DC, GP and CLT: approved the final manuscript as submitted and agree to be accountable for  
9  
10 415 all aspects of the work.

11  
12  
13 416 **Data Sharing:**

14  
15 417 The linked administrative data are owned by the government departments who approved the linkage  
16  
17 418 and use of the data for this study. Use of the study data is restricted to named researchers. The current  
18  
19 419 Human Research Ethics Committee approvals were obtained for public sharing and presentation of data  
20  
21  
22 420 on group level only, meaning the data used in this study cannot be shared by the authors. Collaborative  
23  
24 421 research may be conducted according to the ethical requirements and relevant privacy legislations.  
25  
26 422 Potential collaborators should contact author GP with their expression of interest. The steps involved in  
27  
28  
29 423 seeking permission for linkage and use of the data used in this study are the same for all researchers.  
30  
31  
32  
33  
34  
35  
36  
37  
38  
39  
40  
41  
42  
43  
44  
45  
46  
47  
48  
49  
50  
51  
52  
53  
54  
55  
56  
57  
58  
59  
60



## References

1. Umstad MP, Gronow MJ. Multiple pregnancy: a modern epidemic? *Medical journal of Australia*. 2003;178(12):613-615.
2. Marlow N, Roberts BL, Cooke RW. Motor skills in extremely low birthweight children at the age of 6 years. *Arch Dis Child*. 1989 Jun;64(6):839-47.
3. Riese M. Risk and early development: Findings from the Louisville Twin Study. In: Blickstein I, Keith LG, editors. *Multiple Pregnancy: Epidemiology, Gestation, and Perinatal Outcome*. 2 ed: CRC Press; 2005.
4. Australian Bureau of Statistics. *Births* Canberra; 2015. Available from: <http://www.abs.gov.au/AUSSTATS/abs@.nsf/Previousproducts/3301.0Main%20Features32015?open=document&tabname=Summary&prodno=3301.0&issue=2015&num=&view=>
5. Australian Institute of Health and Welfare. *Perinatal deaths in Australia 2013–2014*. Canberra; 2018.
6. Rice ML, Zubrick SR, Taylor CL, Hoffman L, Gayán J. Longitudinal Study of Language and Speech of Twins at 4 and 6 Years: Twinning Effects Decrease, Zygosity Effects Disappear, and Heritability Increases. *J. Speech Lang. Hear. Res.* 2018;61(1):79-93.
7. Fuchs F, Senat MV. Multiple gestations and preterm birth. *Seminars in fetal & neonatal medicine*. 2016;21(2):113-120.
8. Yokoyama Y, Shimizu T, Hayakawa K. Prevalence of cerebral palsy in twins, triplets and quadruplets. *International journal of epidemiology*. 1995;24(5):943-948. Available from: PubMed
9. Taylor CL, Rice ML, Christensen D, Blair E, Zubrick SR. Prenatal and perinatal risks for late language emergence in a population-level sample of twins at age 2. *BMC Pediatr*. 2018 Feb 7;18(1):41.
10. Taylor C, Zubrick S, Christensen D. Multiple risk exposures for reading achievement in childhood and adolescence. *Journal of Epidemiology and Community Health*. 2019;jech-2018-211323.
11. Nan C, Piek J, Warner C, Mellers D, Krone RE, Barrett T, et al. Trajectories and predictors of developmental skills in healthy twins up to 24 months of age. *Infant Behav Dev*. 2013 Dec;36(4):670-8.
12. DiLalla LF. Social Development of Twins. *Twin Research and Human Genetics*. 2006;9(1):95-102.

- 1 451 13. U. Bronfenbrenner. Making Human Beings Human: Bioecological Perspectives on Human  
2  
3 452 Development. Thousand Oaks, California Sage Publications, Inc.; 2005.  
4
- 5  
6 453 14. Fox SE, Levitt P, Nelson CA, 3rd. How the timing and quality of early experiences influence the  
7  
8 454 development of brain architecture. *Child Dev.* 2010 Jan-Feb;81(1):28-40.  
9
- 10 455 15. Barker DJ. The developmental origins of adult disease. *J Am Coll Nutr.* 2004 Dec;23(6  
11  
12 456 Suppl):588s-595s.  
13
- 14  
15 457 16. Bradley RH, Corwyn RF. Socioeconomic status and child development. *Annu Rev Psychol.*  
16  
17 458 2002;53:371-99.  
18
- 19 459 17. Howard K, Roberts G, Lim J, Lee KJ, Barre N, Treyvaud K, et al. Biological and environmental  
20  
21 460 factors as predictors of language skills in very preterm children at 5 years of age. *J Dev Behav Pediatr.*  
22  
23 461 2011 Apr;32(3):239-49.  
24
- 25 462 18. Msall ME, Buck GM, Rogers BT, Catanzaro NL. Kindergarten readiness after extreme prematurity.  
26  
27 463 *Am J Dis Child.* 1992 Nov;146(11):1371-5.  
28
- 29  
30 464 19. Roberts G, Lim J, Doyle LW, Anderson PJ. High rates of school readiness difficulties at 5 years of  
31  
32 465 age in very preterm infants compared with term controls. *J Dev Behav Pediatr.* 2011 Feb-  
33  
34 466 Mar;32(2):117-24.  
35
- 36 467 20. Shah PE, Kaciroti N, Richards B, Lumeng JC. Gestational Age and Kindergarten School Readiness  
37  
38 468 in a National Sample of Preterm Infants. *J Pediatr.* 2016 Nov;178:61-67.  
39
- 40 469 21. Chen JH, Claessens A, Msall ME. Prematurity and school readiness in a nationally representative  
41  
42 470 sample of Australian children: does typically occurring preschool moderate the relationship? *Early Hum*  
43  
44 471 *Dev.* 2014 Feb;90(2):73-9.  
45
- 46 472 22. Poulsen G, Wolke D, Kurinczuk JJ, Boyle EM, Field D, Alfirevic Z, et al. Gestational age and  
47  
48 473 cognitive ability in early childhood: a population-based cohort study. *Paediatr Perinat Epidemiol.* 2013  
49  
50 474 Jul;27(4):371-9.  
51
- 52  
53 475 23. Quigley MA, Poulsen G, Boyle E, Wolke D, Field D, Alfirevic Z, et al. Early term and late preterm  
54  
55 476 birth are associated with poorer school performance at age 5 years: a cohort study. *Archives of Disease*  
56  
57 477 *in Childhood - Fetal and Neonatal Edition.* 2012;97(3):F167-F173.  
58  
59  
60

- 1 478 24. Patrianakos-Hoobler AI, Msall ME, Huo D, Marks JD, Plesha-Troyke S, Schreiber MD. Predicting  
2 school readiness from neurodevelopmental assessments at age 2 years after respiratory distress  
3 479 syndrome in infants born preterm. *Developmental medicine and child neurology*. 2010;52(4):379-385.  
4  
5 480  
6  
7 481 25. McCormick MC, Brooks-Gunn J, Workman-Daniels K, Turner J, Peckham GJ. The Health and  
8 Developmental Status of Very Low—Birth-Weight Children at School Age. *Jama*. 1992;267(16):2204-  
9 482 2208.  
10  
11 483  
12  
13 484 26. Reichman NE. Low birth weight and school readiness. *Future Child*. 2005 Spring;15(1):91-116.  
14  
15  
16 485 27. Roth J, Figlio DN, Chen Y, Ariet M, Carter RL, Resnick MB, et al. Maternal and infant factors  
17 associated with excess kindergarten costs. *Pediatrics*. 2004 Sep;114(3):720-8.  
18 486  
19  
20 487 28. Avchen RN, Scott KG, Mason CA. Birth weight and school-age disabilities: a population-based  
21 study. *Am J Epidemiol*. 2001 Nov 15;154(10):895-901.  
22 488  
23  
24  
25 489 29. Noeker M. Neurocognitive Development in Children Experiencing Intrauterine Growth Retardation  
26 and Born Small for Gestational Age: Pathological, Constitutional and Therapeutic Pathways. *Hormone  
27 Research in Paediatrics*. 2005;64(suppl 3)(Suppl. 3):83-88.  
28 491  
29  
30  
31 492 30. de Bie HM, Oostrom KJ, Delemarre-van de Waal HA. Brain development, intelligence and  
32 cognitive outcome in children born small for gestational age. *Horm Res Paediatr*. 2010;73(1):6-14.  
33 493  
34  
35  
36 494 31. Janus M, Duku E. The School Entry Gap: Socioeconomic, Family, and Health Factors Associated  
37 With Children's School Readiness to Learn. *Early Education and Development*. 2007 Oct 11;18(3):375-  
38 495 403.  
39 496  
40  
41  
42 497 32. Mendez LMR, Mihalas ST, Hardesty R. Gender Differences in Academic Development and  
43 Performance. 2006.  
44 498  
45  
46 499 33. Angenent H, De Man A. Intelligence, gender, social maturity, and school readiness in Dutch first-  
47 graders. *Social Behavior & Personality: an international journal*. 1989;17(2).  
48 500  
49  
50  
51 501 34. Janus M, Offord DR. Development and psychometric properties of the Early Development  
52 Instrument (EDI): A measure of children's school readiness. *Canadian Journal of Behavioural  
53 502 Science/Revue canadienne des sciences du comportement*. 2007;39(1):1.  
54 503  
55  
56  
57 504 35. Martin JA, Hamilton BE, Ventura SJ, Osterman MJ, Kirmeyer S, Mathews TJ, et al. Births: final  
58 data for 2009. *Natl Vital Stat Rep*. 2011 Nov 3;60(1):1-70.  
59 505  
60

- 1 506 36. Puccio G, Giuffré M, Piccione M, Piro E, Malerba V, Corsello G. Intrauterine growth pattern and  
2 birthweight discordance in twin pregnancies: a retrospective study. *Italian Journal of Pediatrics*.  
3 507 2014;40(1):43.  
4  
5 508  
6  
7 509 37. Lorenz JM. Neurodevelopmental outcomes of twins. *Seminars in perinatology*. 2012;36(3):201-  
8 212.  
9 510  
10  
11  
12 511 38. Wilson RS. Twins: Patterns of cognitive development as measured on the Wechsler Preschool and  
13 Primary Scale of Intelligence. *Developmental Psychology*. 1975;11(2):126-134.  
14  
15  
16 513 39. Heckman J. Schools, skills, and synapses. *Econ Inq*. 2008;46(3):289-324.  
17  
18  
19 514 40. Entwisle DR, Alexander KL. Entry into school: The beginning school transition and educational  
20 stratification in the United States. *Annual review of sociology*. 1993;19(1):401-423.  
21  
22  
23 516 41. Friend A, DeFries JC, Olson RK, Pennington B, Harlaar N, Byrne B, et al. Heritability of high  
24 reading ability and its interaction with parental education. *Behavior genetics*. 2009;39(4):427-436.  
25 517  
26  
27  
28 518 42. Harden KP, Turkheimer E, Loehlin JC. Genotype by environment interaction in adolescents'  
29 cognitive aptitude. *Behavior genetics*. 2007;37(2):273-283.  
30 519  
31  
32 520 43. Turkheimer E, Haley A, Waldron M, d'Onofrio B, Gottesman II. Socioeconomic status modifies  
33 heritability of IQ in young children. *Psychological science*. 2003;14(6):623-628.  
34 521  
35  
36  
37 522 44. Rowe DC, Jacobson KC, Van den Oord EJ. Genetic and environmental influences on vocabulary  
38 IQ: Parental education level as moderator. *Child development*. 1999;70(5):1151-1162.  
39 523  
40  
41 524 45. Forget-Dubois N, Dionne G, Lemelin J, Perusse D, Tremblay R, Boivin M. Early child language  
42 mediates the relation between home environment and school readiness. *Child Dev*. 2009 May-  
43 Jun;80(3):736-49.  
44  
45 526  
46  
47 527 46. Sadeghi N, Gilmore JH, Gerig G. Twin-singleton developmental study of brain white matter  
48 anatomy. *Human brain mapping*. 2017;38(2):1009-1024.  
49 528  
50  
51  
52 529 47. Gonski D, Boston, K., Greiner, K., Lawrence, C., Scales, B., & Tannock, P. Review of Funding for  
53 Schooling - Final Report. Canberra, ACT; 2011.  
54 530  
55  
56 531 48. The Longitudinal Study of Australian Children Annual statistical report 2013. Melbourne; 2014.  
57  
58  
59 532 49. Begum L, Islam A, Smyth R. Girl power: stipend programs and the education of younger siblings.  
60 *The Journal of Development Studies*. 2017;53(11):1882-1898.  
533

- 1 534 50. Holman CDAJ, Bass JA, Rosman DL, Smith MB, Semmens JB, Glasson EJ, et al. A decade of data  
2 linkage in Western Australia: strategic design, applications and benefits of the WA data linkage system.  
3 535 Australian Health Review. 2008;32(4):766-777.  
4  
5 536  
6  
7 537 51. McMillan J, Beavis A, Jones F. The AUSEI06:A new socioeconomic index for Australia. J Sociol.  
8 2009;45(2):123-149.  
9 538  
10  
11 12539 52. Blair EM, Liu Y, de Klerk NH, Lawrence DM. Optimal fetal growth for the Caucasian singleton  
13 and assessment of appropriateness of fetal growth: an analysis of a total population perinatal database.  
14 540 BMC Pediatrics. 2005 2005/05/24;5(1):13.  
15 541  
16  
17 18542 53. Pereira G, Blair E, Lawrence D. Validation of a model for optimal birth weight: a prospective study  
19 using serial ultrasounds. BMC Pediatr. 2012 Jun 15;12:73.  
20 543  
21  
22 23544 54. SAS Institute. SAS Cary, NC: SAS Institute. Inc; 2013.  
23  
24  
25 2545 55. Australian Early Development Census National Report 2015. Canberra, Australia; 2016. Available  
26 from: [https://www.aedc.gov.au/Websilk/Handlers/ResourceDocument.ashx?id=45cf2664-db9a-6d2b-  
27 9fad-ff0000a141dd](https://www.aedc.gov.au/Websilk/Handlers/ResourceDocument.ashx?id=45cf2664-db9a-6d2b-9fad-ff0000a141dd)  
28  
29 547  
30  
31 31548 56. Falster K, Hanly M, Banks E, Lynch J, Chambers G, Brownell M, et al. Maternal age and offspring  
32 developmental vulnerability at age five: A population-based cohort study of Australian children. PLOS  
33 549 Medicine. 2018;15(4):e1002558.  
34  
35 550  
36  
37 38551 57. Guthridge S, Li L, Silburn S, Li SQ, McKenzie J, Lynch J. Early influences on developmental  
39 outcomes among children, at age 5, in Australia's Northern Territory. Early Childhood Research  
40 Quarterly. 2016;35:124-134.  
41 553  
42  
43 44554 58. Chittleborough CR, Searle AK, Smithers LG, Brinkman S, Lynch JW. How well can poor child  
45 development be predicted from early life characteristics?: A whole-of-population data linkage study.  
46 555 Early Childhood Research Quarterly. 2016 2016/04/01;35:19-30.  
47 556  
48  
49 50557 59. Lemelin J-P, Boivin M, Forget-Dubois N, Dionne G, Séguin JR, Brendgen M, et al. The Genetic-  
51 Environmental Etiology of Cognitive School Readiness and Later Academic Achievement in Early  
52 558 Childhood. Child Development. 2007;78(6):1855-1869.  
53 559  
54  
55 56560 60. Twins Research Australia (TRA). Multiple perspectives: what support do multiple birth families  
57 need to live happy and healthy lives. Melbourne; 2019.  
58 561  
59  
60

- 1 562 61. Goldfeld S, O'Connor M, Mithen J, Sayers M, Brinkman S. Early development of emerging and  
2 English-proficient bilingual children at school entry in an Australian population cohort. *International*  
3 563 *Journal of Behavioral Development*. 2014;38(1):42-51.  
4  
5 564  
6  
7 565 62. Guhn M, Gadermann A, Almas A, Schonert-Reichl K, Hertzman C. Associations of teacher-rated  
8 social, emotional, and cognitive development in kindergarten to self-reported wellbeing, peer relations,  
9 566 and academic test scores in middle childhood. *Early Child Res Q*. 2016;35:76-84.  
10  
11 567  
12  
13 568 63. Australian Bureau of Statistics. 2016 Census QuickStats Western Australia. Canberra; 2017.  
14 Available from:  
15 569 [https://quickstats.censusdata.abs.gov.au/census\\_services/getproduct/census/2016/quickstat/5?opendoc](https://quickstats.censusdata.abs.gov.au/census_services/getproduct/census/2016/quickstat/5?opendoc)  
16 [ument](#)  
17 570  
18  
19 571  
20  
21 572 64. Statistics Canada. Visual Census. Ottawa.; 2012 [cited 2020 June 20]. Available from:  
22 <http://www12.statcan.gc.ca/census-recensement/2011/dp-pd/vc->  
23 573 [rv/index.cfm?Lang=ENG&TOPIC\\_ID=4&GEOCODE=59](http://www12.statcan.gc.ca/census-recensement/2011/dp-pd/vc-)  
24  
25 574  
26  
27 575 65. Tsou M-T, Tsou M-W, Wu M-P, Liu J-T. Academic achievement of twins and singletons in early  
28 adulthood: Taiwanese cohort study. *BMJ*. 2008;337:a438.  
29  
30 576  
31  
32 577 66. Record RG, McKeown T, Edwards JH. An investigation of the difference in measured intelligence  
33 between twins and single births. *Annals of Human Genetics*. 1970;34(1):11-20.  
34  
35 578  
36 579 67. Brooks-Gunn J, Han WJ, Waldfogel J. Maternal employment and child cognitive outcomes in the  
37 first three years of life: the NICHD Study of Early Child Care. *National Institute of Child Health and*  
38 580 *Human Development*. *Child Dev*. 2002 Jul-Aug;73(4):1052-72.  
39  
40 581  
41  
42 582 68. Dearing E, McCartney K, Taylor BA. Change in family income-to-needs matters more for children  
43 with less. *Child Development*. 2001;72(6):1779-1793.  
44  
45 583  
46  
47 584 69. Abbott-Shim M, Lambert R, McCarty F. A Comparison of School Readiness Outcomes for  
48 Children Randomly Assigned to a Head Start Program and the Program's Wait List. *Journal of*  
49 585 *Education for Students Placed at Risk*. 2003;8(2):191-214.  
50  
51 586  
52  
53 587 70. Ramey CT, Ramey SL. Early learning and school readiness: Can early intervention make a  
54 difference? *Merrill-Palmer Quarterly*. 2004:471-491.  
55 588  
56  
57 589  
58  
59  
60

1 590 **Figures & Tables: (Total 1 Figure & 2 Tables)**  
2

3  
4 591 Figure 1. Eligible Cohort and Numbers Included for Analyses.

5 592 AEDC = Australian Early Development Census. WARDA= Western Australian Register of Developmental Anomalies.  
6  
7  
8  
9  
10  
11  
12  
13  
14  
15  
16  
17  
18  
19  
20  
21  
22  
23  
24  
25  
26  
27  
28  
29  
30  
31  
32  
33  
34  
35  
36  
37  
38  
39  
40  
41  
42  
43  
44  
45  
46  
47  
48  
49  
50  
51  
52  
53  
54  
55  
56  
57  
58  
59  
60

For peer review only



Table 1. Risk factors for children who are developmentally vulnerable on one or more AEDC domains (DVI).

| Characteristic                                            | DV1              | NDV1               | Bivariate                |                   | Multivariable            |               |
|-----------------------------------------------------------|------------------|--------------------|--------------------------|-------------------|--------------------------|---------------|
|                                                           | (N=431)<br>N (%) | (N=1,225)<br>N (%) | OR [95% CI]              | p-value           | aOR [95% CI]             | p-value       |
| <b>Maternal</b>                                           |                  |                    |                          |                   |                          |               |
| <b>Age at Time of Child's Birth (years)</b>               |                  |                    |                          |                   |                          |               |
| <25                                                       | 105 (24.36)      | 117 (9.55)         | <b>9.66 [3.68-25.32]</b> | <b>&lt;0.0001</b> | <b>7.06 [2.29-21.76]</b> | <b>0.0007</b> |
| 25-29                                                     | 90 (20.88)       | 294 (24.00)        | 1.00 [referent]          |                   | 1.00 [referent]          |               |
| 30-34                                                     | 130 (30.16)      | 476 (38.86)        | 0.81 [0.38-1.72]         | 0.5763            | 0.89 [0.38-2.07]         | 0.7796        |
| ≥35                                                       | 106 (24.59)      | 338 (27.59)        | 1.06 [0.48-2.36]         | 0.8856            | 1.19 [0.47-2.99]         | 0.7149        |
| <b>Marital Status</b>                                     |                  |                    |                          |                   |                          |               |
| Married (inc. de facto)                                   | 357 (82.83)      | 1,123 (91.67)      | 1.00 [referent]          |                   | 1.00 [referent]          |               |
| All Other                                                 | 72 (16.71)       | 98 (8.00)          | <b>5.99 [2.43-14.75]</b> | <b>0.0001</b>     | 2.26 [0.76-6.71]         | 0.1401        |
| Unavailable                                               | 2 (0.46)         | 4 (0.33)           |                          |                   |                          |               |
| <b>Occupational Status Scale at Time of Child's Birth</b> |                  |                    |                          |                   |                          |               |
| 0-20                                                      | 122 (28.31)      | 187 (15.27)        | <b>5.58 [2.71-11.46]</b> | <b>&lt;0.0001</b> | 1.83 [0.79-4.26]         | 0.1586        |
| >20-100                                                   | 279 (64.73)      | 1,006 (82.12)      | 1.00 [referent]          |                   | 1.00 [referent]          |               |
| Unavailable                                               | 30 (6.96)        | 32 (2.61)          |                          |                   |                          |               |
| <b>Pregnancy &amp; Birth</b>                              |                  |                    |                          |                   |                          |               |
| <b>Fertility Treatments</b>                               |                  |                    |                          |                   |                          |               |
| No                                                        | 377 (87.47)      | 1,011 (82.53)      | 1.00 [referent]          |                   | 1.00 [referent]          |               |
| Yes                                                       | 54 (12.53)       | 214 (17.47)        | 0.43 [0.19-0.97]         | 0.0417            | 0.84 [0.32-2.23]         | 0.7291        |
| <b>Smoking Status During Pregnancy</b>                    |                  |                    |                          |                   |                          |               |
| No                                                        | 339 (78.65)      | 1,079 (88.08)      | 1.00 [referent]          |                   | 1.00 [referent]          |               |
| Yes                                                       | 92 (21.35)       | 146 (11.92)        | <b>4.31 [1.95-9.53]</b>  | <b>0.0003</b>     | 0.87 [0.34-2.27]         | 0.7785        |
| <b>Pre-eclampsia</b>                                      |                  |                    |                          |                   |                          |               |
| No                                                        | 375 (87.01)      | 1,085 (88.57)      | 1.00 [referent]          |                   | 1.00 [referent]          |               |
| Yes                                                       | 56 (12.99)       | 140 (11.43)        | 1.40 [0.59-3.34]         | 0.4443            | 1.82 [0.68-4.88]         | 0.2373        |
| <b>Gestational Diabetes</b>                               |                  |                    |                          |                   |                          |               |
| No                                                        | 402 (93.27)      | 1,152 (94.04)      | 1.00 [referent]          |                   | 1.00 [referent]          |               |
| Yes                                                       | 29 (6.73)        | 73 (5.96)          | 1.30 [0.40-4.22]         | 0.6571            | 1.15 [0.33-4.09]         | 0.8263        |
| <b>Threatened Abortion</b>                                |                  |                    |                          |                   |                          |               |
| No                                                        | 416 (96.52)      | 1,156 (94.37)      | 1.00 [referent]          |                   | 1.00 [referent]          |               |
| Yes                                                       | 15 (3.48)        | 69 (5.63)          | 0.36 [0.09-1.45]         | 0.1514            | 0.23 [0.04-1.35]         | 0.1031        |
| <b>Other Pregnancy Related Complications</b>              |                  |                    |                          |                   |                          |               |
| No                                                        | 125 (29.00)      | 451 (36.82)        | 1.00 [referent]          |                   | 1.00 [referent]          |               |
| Yes                                                       | 306 (71.00)      | 774 (63.18)        | <b>2.08 [1.12-3.85]</b>  | <b>0.0198</b>     | 1.79 [0.85-3.79]         | 0.1285        |
| <b>Threatened Preterm Labour</b>                          |                  |                    |                          |                   |                          |               |
| No                                                        | 376 (87.24)      | 1,088 (88.82)      | 1.00 [referent]          |                   | 1.00 [referent]          |               |
| Yes                                                       | 55 (12.76)       | 137 (11.18)        | 1.34 [0.55-3.24]         | 0.5189            | 0.68 [0.25-1.83]         | 0.4461        |
| <b>APH</b>                                                |                  |                    |                          |                   |                          |               |
| No                                                        | 411 (95.36)      | 1,187 (96.90)      | 1.00 [referent]          |                   | 1.00 [referent]          |               |
| Yes                                                       | 20 (4.64)        | 38 (3.10)          | 2.38 [0.53-10.73]        | 0.2603            | 0.67 [0.12-3.85]         | 0.6502        |
| <b>Placenta Praevia <sup>a</sup></b>                      |                  |                    |                          |                   |                          |               |
| No                                                        | 429 (99.54)      | 1,217 (99.35)      |                          |                   |                          |               |
| Yes                                                       | 2 (0.46)         | 8 (0.65)           |                          |                   |                          |               |
| <b>Placental Abruption <sup>a</sup></b>                   |                  |                    |                          |                   |                          |               |
| No                                                        | 427 (99.07)      | 1,223 (99.84)      |                          |                   |                          |               |
| Yes                                                       | 4 (0.93)         | 2 (0.16)           |                          |                   |                          |               |
| <b>Fetal Distress</b>                                     |                  |                    |                          |                   |                          |               |
| No                                                        | 382 (88.63)      | 1,136 (92.73)      | 1.00 [referent]          |                   | 1.00 [referent]          |               |
| Yes                                                       | 49 (11.37)       | 89 (7.27)          | <b>2.92 [1.13-7.58]</b>  | <b>0.0277</b>     | 1.76 [0.60-5.13]         | 0.3013        |
| <b>Cephalopelvic Disproportion <sup>a</sup></b>           |                  |                    |                          |                   |                          |               |
| No                                                        | 431 (100.00)     | 1,221 (99.67)      |                          |                   |                          |               |
| Yes                                                       | 0 (0.00)         | 4 (0.33)           |                          |                   |                          |               |
| <b>Prolapsed Cord <sup>a</sup></b>                        |                  |                    |                          |                   |                          |               |



|                                                            |             |               |                           |                   |                          |                   |
|------------------------------------------------------------|-------------|---------------|---------------------------|-------------------|--------------------------|-------------------|
| No                                                         | 428 (99.30) | 1,215 (99.18) |                           |                   |                          |                   |
| Yes                                                        | 3 (0.70)    | 10 (0.82)     |                           |                   |                          |                   |
| <b>Precipitate Delivery<sup>a</sup></b>                    |             |               |                           |                   |                          |                   |
| No                                                         | 424 (98.38) | 1,206 (98.45) |                           |                   |                          |                   |
| Yes                                                        | 7 (1.62)    | 19 (1.55)     |                           |                   |                          |                   |
| <b>PPH ≥500mls</b>                                         |             |               |                           |                   |                          |                   |
| No                                                         | 281 (65.20) | 918 (74.94)   | 1.00 [referent]           |                   | 1.00 [referent]          |                   |
| Yes                                                        | 150 (34.80) | 307 (25.06)   | <b>2.59 [1.39-4.82]</b>   | <b>0.0029</b>     | 1.52 [0.73-3.16]         | 0.2603            |
| <b>TSR ≥2mins</b>                                          |             |               |                           |                   |                          |                   |
| No                                                         | 364 (84.45) | 1,060 (86.53) | 1.00 [referent]           |                   | 1.00 [referent]          |                   |
| Yes                                                        | 67 (15.55)  | 165 (13.47)   | 1.06 [0.56-1.99]          | 0.8628            | 0.52 [0.22-1.21]         | 0.1277            |
| <b>Apgar 5-minutes &lt;7<sup>a</sup></b>                   |             |               |                           |                   |                          |                   |
| No                                                         | 425 (98.61) | 1,198 (97.80) |                           |                   |                          |                   |
| Yes                                                        | 6 (1.39)    | 27 (2.20)     |                           |                   |                          |                   |
| <b>Intubation</b>                                          |             |               |                           |                   |                          |                   |
| No                                                         | 353 (81.90) | 1,036 (84.57) | 1.00 [referent]           |                   | 1.00 [referent]          |                   |
| Yes                                                        | 78 (18.10)  | 189 (15.43)   | 1.36 [0.75-2.45]          | 0.3129            | 1.54 [0.71-3.37]         | 0.2770            |
| <b>Early Preterm Birth</b>                                 |             |               |                           |                   |                          |                   |
| No                                                         | 352 (81.67) | 1,058 (86.37) | 1.00 [referent]           |                   | 1.00 [referent]          |                   |
| Yes                                                        | 79 (18.33)  | 167 (13.63)   | 2.08 [0.94-4.56]          | 0.0691            | 1.29 [0.53-3.15]         | 0.5788            |
| <b>POBW &lt;15<sup>th</sup> Percentile</b>                 |             |               |                           |                   |                          |                   |
| No                                                         | 305 (70.77) | 926 (75.59)   | 1.00 [referent]           |                   | 1.00 [referent]          |                   |
| Yes                                                        | 81 (18.79)  | 136 (11.10)   | <b>2.09 [1.14-3.84]</b>   | <b>0.0174</b>     | <b>2.06 [1.07-3.98]</b>  | <b>0.0309</b>     |
| Unavailable                                                | 45 (10.44)  | 163 (13.31)   |                           |                   |                          |                   |
| <b>Parity</b>                                              |             |               |                           |                   |                          |                   |
| 0                                                          | 150 (34.80) | 512 (41.80)   | 1.00 [referent]           |                   | 1.00 [referent]          |                   |
| 1                                                          | 154 (35.73) | 429 (35.02)   | 1.62 [0.83-3.16]          | 0.1579            | 1.96 [0.77-5.00]         | 0.1594            |
| ≥2                                                         | 127 (29.47) | 284 (23.18)   | <b>2.50 [1.20-5.22]</b>   | <b>0.0145</b>     | 2.03 [0.55-7.48]         | 0.2881            |
| <b>Child</b>                                               |             |               |                           |                   |                          |                   |
| <b>Sex</b>                                                 |             |               |                           |                   |                          |                   |
| Female                                                     | 176 (40.84) | 674 (55.02)   | 1.00 [referent]           |                   | 1.00 [referent]          |                   |
| Male                                                       | 255 (59.16) | 551 (44.98)   | <b>4.44 [2.68-7.36]</b>   | <b>&lt;0.0001</b> | <b>5.08 [2.89-8.92]</b>  | <b>&lt;0.0001</b> |
| <b>Ethnicity</b>                                           |             |               |                           |                   |                          |                   |
| Other                                                      | 385 (89.33) | 1,187 (96.90) | 1.00 [referent]           |                   | 1.00 [referent]          |                   |
| Indigenous Australian                                      | 46 (10.67)  | 38 (3.10)     | <b>16.98 [4.85-59.46]</b> | <b>&lt;0.0001</b> | 2.46 [0.46-13.03]        | 0.2909            |
| <b>Child Speaks Language Other Than English at Home</b>    |             |               |                           |                   |                          |                   |
| No                                                         | 367 (85.15) | 1,149 (93.80) | 1.00 [referent]           |                   | 1.00 [referent]          |                   |
| Yes                                                        | 64 (14.85)  | 76 (6.20)     | <b>6.28 [2.48-15.90]</b>  | <b>0.0001</b>     | <b>6.45 [2.17-19.17]</b> | <b>0.0008</b>     |
| <b>Age Category at Time of AEDC Completion<sup>b</sup></b> |             |               |                           |                   |                          |                   |
| 1                                                          | 109 (25.29) | 212 (17.31)   | <b>2.93 [1.45-5.90]</b>   | <b>0.0028</b>     | <b>3.34 [1.55-7.22]</b>  | <b>0.0022</b>     |
| 2                                                          | 288 (66.82) | 911 (74.37)   | 1.00 [referent]           |                   | 1.00 [referent]          |                   |
| 3                                                          | 34 (7.89)   | 102 (8.33)    | 1.18 [0.43-3.27]          | 0.7460            | 0.77 [0.23-2.54]         | 0.6660            |
| <b>Total Number of Siblings</b>                            |             |               |                           |                   |                          |                   |
| 1                                                          | 119 (27.61) | 389 (31.76)   | 1.00 [referent]           |                   | 1.00 [referent]          |                   |
| 2                                                          | 160 (37.12) | 494 (40.33)   | 1.15 [0.58-2.30]          | 0.6845            | 0.70 [0.27-1.83]         | 0.4610            |
| 3                                                          | 74 (17.17)  | 240 (19.59)   | 1.04 [0.45-2.41]          | 0.9264            | 0.44 [0.13-1.55]         | 0.1996            |
| >3                                                         | 78 (18.10)  | 102 (8.33)    | <b>7.28 [2.73-19.45]</b>  | <b>&lt;0.0001</b> | 2.71 [0.60-12.22]        | 0.1939            |
| <b>Sociodemographic</b>                                    |             |               |                           |                   |                          |                   |
| <b>Index of Relative Socioeconomic Disadvantage</b>        |             |               |                           |                   |                          |                   |
| Lowest Quintile                                            | 327 (75.87) | 1,046 (85.39) | <b>3.55 [1.62-7.78]</b>   | <b>0.0016</b>     | 1.63 [0.66-4.02]         | 0.2871            |
| > Lowest Quintile                                          | 87 (20.19)  | 150 (12.24)   | 1.00 [referent]           |                   | 1.00 [referent]          |                   |
| Unavailable                                                | 17 (3.94)   | 29 (2.37)     |                           |                   |                          |                   |

<sup>a</sup> Excluded from multivariable analysis due to small N.

<sup>b</sup> Age categories classified as; ≥3 years 10 months to <5 years and one month, 2) ≥5 years and one month to <5 years and 10 months (reference category), 3) ≥5 years and 10 months to <6 years 10 months.

1 598 Table 2. Risk factors for children who are developmentally vulnerable on two or more AEDC  
 2 599 domains (DV2).

| Characteristic                                            | DV2<br>(N=223)<br>N (%) | NDV2<br>(N=1,433)<br>N (%) | Bivariate                |                   | Multivariable<br>(N=1,352) |               |
|-----------------------------------------------------------|-------------------------|----------------------------|--------------------------|-------------------|----------------------------|---------------|
|                                                           |                         |                            | OR [95% CI]              | p-value           | aOR [95% CI]               | p-value       |
| <b>Maternal</b>                                           |                         |                            |                          |                   |                            |               |
| <b>Age at Time of Child's Birth (years)</b>               |                         |                            |                          |                   |                            |               |
| <25                                                       | 63 (28.25)              | 159 (11.10)                | <b>7.81 [2.60-23.45]</b> | <b>0.0003</b>     | <b>5.60 [1.30-24.10]</b>   | <b>0.0208</b> |
| 25-29                                                     | 48 (21.52)              | 336 (23.45)                | 1.00 [referent]          |                   | 1.00 [referent]            |               |
| 30-34                                                     | 64 (28.70)              | 542 (37.82)                | 0.65 [0.26-1.63]         | 0.3563            | 0.92 [0.29-2.91]           | 0.8854        |
| ≥35                                                       | 48 (21.52)              | 396 (27.63)                | 0.67 [0.25-1.81]         | 0.4335            | 0.77 [0.22-2.76]           | 0.6892        |
| <b>Marital Status</b>                                     |                         |                            |                          |                   |                            |               |
| Married (inc. de facto)                                   | 172 (77.13)             | 1,308 (91.28)              | 1.00 [referent]          |                   |                            |               |
| All Other                                                 | 49 (21.97)              | 121 (8.44)                 | <b>9.91 [3.54-27.77]</b> | <b>&lt;0.0001</b> | <b>4.59 [1.13-18.55]</b>   | <b>0.0327</b> |
| Unavailable                                               | 2 (0.90)                | 4 (0.28)                   |                          |                   |                            |               |
| <b>Occupational Status Scale at Time of Child's Birth</b> |                         |                            |                          |                   |                            |               |
| 0-20                                                      | 78 (34.98)              | 231 (16.12)                | <b>8.82 [3.72-20.89]</b> | <b>&lt;0.0001</b> | <b>3.30 [1.11-9.81]</b>    | <b>0.0322</b> |
| >20-100                                                   | 130 (58.30)             | 1,155 (80.60)              | 1.00 [referent]          |                   | 1.00 [referent]            |               |
| Unavailable                                               | 15 (6.73)               | 47 (3.28)                  |                          |                   |                            |               |
| <b>Pregnancy &amp; Birth</b>                              |                         |                            |                          |                   |                            |               |
| <b>Fertility Treatments</b>                               |                         |                            |                          |                   |                            |               |
| No                                                        | 200 (89.69)             | 1,188 (82.90)              | 1.00 [referent]          |                   | 1.00 [referent]            |               |
| Yes                                                       | 23 (10.31)              | 245 (17.10)                | 0.35 [0.13-0.97]         | 0.0424            | 0.67 [0.17-2.69]           | 0.5673        |
| <b>Smoking Status During Pregnancy</b>                    |                         |                            |                          |                   |                            |               |
| No                                                        | 166 (74.44)             | 1,252 (87.37)              | 1.00 [referent]          |                   | 1.00 [referent]            |               |
| Yes                                                       | 57 (25.56)              | 181 (12.63)                | <b>5.83 [2.32-14.65]</b> | <b>0.0002</b>     | 1.27 [0.38-4.30]           | 0.7000        |
| <b>Pre-eclampsia</b>                                      |                         |                            |                          |                   |                            |               |
| No                                                        | 195 (87.44)             | 1,265 (88.28)              | 1.00 [referent]          |                   | 1.00 [referent]            |               |
| Yes                                                       | 28 (12.56)              | 168 (11.72)                | 1.25 [0.41-3.86]         | 0.6930            | 2.45 [0.65-9.17]           | 0.1844        |
| <b>Gestational Diabetes</b>                               |                         |                            |                          |                   |                            |               |
| No                                                        | 208 (93.27)             | 1,346 (93.93)              | 1.00 [referent]          |                   | 1.00 [referent]            |               |
| Yes                                                       | 15 (6.73)               | 87 (6.07)                  | 1.44 [0.32-6.42]         | 0.6353            | 2.29 [0.46-11.44]          | 0.3124        |
| <b>Threatened Abortion</b>                                |                         |                            |                          |                   |                            |               |
| No                                                        | 214 (95.96)             | 1,358 (94.77)              | 1.00 [referent]          |                   | 1.00 [referent]            |               |
| Yes                                                       | 9 (4.04)                | 75 (5.23)                  | 0.54 [0.10-2.94]         | 0.4784            | 0.24 [0.02-3.08]           | 0.2735        |
| <b>Other Pregnancy Related Complications</b>              |                         |                            |                          |                   |                            |               |
| No                                                        | 57 (25.56)              | 519 (36.22)                | 1.00 [referent]          |                   | 1.00 [referent]            |               |
| Yes                                                       | 166 (74.44)             | 914 (63.78)                | <b>2.64 [1.22-5.69]</b>  | <b>0.0136</b>     | 1.64 [0.58-4.61]           | 0.3510        |
| <b>Threatened Preterm Labour</b>                          |                         |                            |                          |                   |                            |               |
| No                                                        | 191 (85.65)             | 1,273 (88.83)              | 1.00 [referent]          |                   | 1.00 [referent]            |               |
| Yes                                                       | 32 (14.35)              | 160 (11.17)                | 2.04 [0.66-6.29]         | 0.2163            | 0.72 [0.20-2.61]           | 0.6131        |
| <b>APH</b>                                                |                         |                            |                          |                   |                            |               |
| No                                                        | 209 (93.72)             | 1,389 (96.93)              | 1.00 [referent]          |                   | 1.00 [referent]            |               |
| Yes                                                       | 14 (6.28)               | 44 (3.07)                  | 5.96 [0.95-37.40]        | 0.0568            | 1.56 [0.59-4.15]           | 0.3677        |
| <b>Placenta Praevia<sup>a</sup></b>                       |                         |                            |                          |                   |                            |               |
| No                                                        | 223 (100.00)            | 1,423 (99.30)              |                          |                   |                            |               |
| Yes                                                       | 0 (0.00)                | 10 (0.70)                  |                          |                   |                            |               |
| <b>Placental Abruption<sup>a</sup></b>                    |                         |                            |                          |                   |                            |               |
| No                                                        | 221 (99.10)             | 1,429 (99.72)              |                          |                   |                            |               |
| Yes                                                       | 2 (0.90)                | 4 (0.28)                   |                          |                   |                            |               |
| <b>Fetal Distress</b>                                     |                         |                            |                          |                   |                            |               |
| No                                                        | 195 (87.44)             | 1,323 (92.32)              | 1.00 [referent]          |                   | 1.00 [referent]            |               |
| Yes                                                       | 28 (12.56)              | 110 (7.68)                 | 3.03 [0.90-10.23]        | 0.0735            | 1.56 [0.59-4.15]           | 0.3677        |
| <b>Cephalopelvic Disproportion<sup>a</sup></b>            |                         |                            |                          |                   |                            |               |
| No                                                        | 223 (100.00)            | 1,429 (99.72)              |                          |                   |                            |               |
| Yes                                                       | 0 (0.00)                | 4 (0.28)                   |                          |                   |                            |               |
| <b>Prolapsed Cord<sup>a</sup></b>                         |                         |                            |                          |                   |                            |               |

|                                                         |             |               |                           |                   |                          |                   |
|---------------------------------------------------------|-------------|---------------|---------------------------|-------------------|--------------------------|-------------------|
| No                                                      | 220 (98.65) | 1,423 (99.30) |                           |                   |                          |                   |
| Yes                                                     | 3 (1.35)    | 10 (0.70)     |                           |                   |                          |                   |
| <b>Precipitate Delivery<sup>a</sup></b>                 |             |               |                           |                   |                          |                   |
| No                                                      | 219 (98.21) | 1,411 (98.46) |                           |                   |                          |                   |
| Yes                                                     | 4 (1.79)    | 22 (1.54)     |                           |                   |                          |                   |
| <b>PPH ≥500mls</b>                                      |             |               |                           |                   |                          |                   |
| No                                                      | 141 (63.23) | 1,058 (73.83) | 1.00 [referent]           |                   | 1.00 [referent]          |                   |
| Yes                                                     | 82 (36.77)  | 375 (26.17)   | <b>3.43 [1.49-7.94]</b>   | <b>0.0040</b>     | 1.38 [0.16-11.79]        | 0.7661            |
| <b>TSR ≥2mins</b>                                       |             |               |                           |                   |                          |                   |
| No                                                      | 183 (82.06) | 1,241 (86.60) | 1.00 [referent]           |                   | 1.00 [referent]          |                   |
| Yes                                                     | 40 (17.94)  | 192 (13.40)   | 1.78 [0.81-3.89]          | 0.1486            | 0.91 [0.30-2.72]         | 0.8631            |
| <b>Apgar 5-minutes &lt;7<sup>a</sup></b>                |             |               |                           |                   |                          |                   |
| No                                                      | 219 (98.21) | 1,404 (97.98) |                           |                   |                          |                   |
| Yes                                                     | 4 (1.79)    | 29 (2.02)     |                           |                   |                          |                   |
| <b>Intubation</b>                                       |             |               |                           |                   |                          |                   |
| No                                                      | 178 (79.82) | 1,211 (84.51) | 1.00 [referent]           |                   | 1.00 [referent]          |                   |
| Yes                                                     | 45 (20.18)  | 222 (15.49)   | 1.91 [0.90-4.05]          | 0.0931            | 1.53 [0.54-4.35]         | 0.4290            |
| <b>Early Preterm Birth</b>                              |             |               |                           |                   |                          |                   |
| No                                                      | 172 (77.13) | 1,238 (86.39) | 1.00 [referent]           |                   | 1.00 [referent]          |                   |
| Yes                                                     | 51 (22.87)  | 195 (13.61)   | <b>4.18 [1.50-11.67]</b>  | <b>0.0064</b>     | 2.06 [0.64-6.58]         | 0.2243            |
| <b>POBW &lt;15<sup>th</sup> Percentile</b>              |             |               |                           |                   |                          |                   |
| No                                                      | 162 (72.65) | 1,069 (74.60) | 1.00 [referent]           |                   | 1.00 [referent]          |                   |
| Yes                                                     | 42 (18.83)  | 175 (12.21)   | <b>2.72 [1.25-5.93]</b>   | <b>0.0119</b>     | <b>3.11 [1.26-7.64]</b>  | <b>0.0136</b>     |
| Unavailable                                             | 19 (8.52)   | 189 (13.19)   |                           |                   |                          |                   |
| <b>Parity</b>                                           |             |               |                           |                   |                          |                   |
| 0                                                       | 79 (35.43)  | 583 (40.68)   | 1.00 [referent]           |                   | 1.00 [referent]          |                   |
| 1                                                       | 73 (32.74)  | 510 (35.59)   | 1.18 [0.51-2.76]          | 0.7002            | 1.12 [0.31-4.04]         | 0.8612            |
| ≥2                                                      | 71 (31.84)  | 340 (23.73)   | <b>2.66 [1.04-6.83]</b>   | <b>0.0420</b>     | 3.61 [0.61-21.22]        | 0.1551            |
| <b>Child</b>                                            |             |               |                           |                   |                          |                   |
| <b>Sex</b>                                              |             |               |                           |                   |                          |                   |
| Female                                                  | 83 (37.22)  | 767 (53.52)   | 1.00 [referent]           |                   | 1.00 [referent]          |                   |
| Male                                                    | 140 (62.78) | 666 (46.48)   | <b>5.42 [2.79-10.55]</b>  | <b>&lt;0.0001</b> | <b>7.87 [3.45-17.97]</b> | <b>&lt;0.0001</b> |
| <b>Ethnicity</b>                                        |             |               |                           |                   |                          |                   |
| Other                                                   | 197 (88.34) | 1,375 (95.95) | 1.00 [referent]           |                   | 1.00 [referent]          |                   |
| Indigenous Australian                                   | 26 (11.66)  | 58 (4.05)     | <b>11.00 [2.78-43.60]</b> | <b>0.0007</b>     | 2.32 [0.32-16.84]        | 0.4037            |
| <b>Child Speaks Language Other Than English at Home</b> |             |               |                           |                   |                          |                   |
| No                                                      | 192 (86.10) | 1,324 (92.39) | 1.00 [referent]           |                   | 1.00 [referent]          |                   |
| Yes                                                     | 31 (13.90)  | 109 (7.61)    | 3.19 [0.96-10.63]         | 0.0589            | <b>4.65 [1.14-19.03]</b> | <b>0.0330</b>     |
| <b>Age Category at Time of AEDC Completion</b>          |             |               |                           |                   |                          |                   |
| 1                                                       | 66 (29.60)  | 255 (17.79)   | <b>4.11 [1.80-9.39]</b>   | <b>0.0008</b>     | <b>5.36 [1.94-14.82]</b> | <b>0.0013</b>     |
| 2                                                       | 142 (63.68) | 1,057 (73.76) | 1.00 [referent]           |                   | 1.00 [referent]          |                   |
| 3                                                       | 15 (6.73)   | 121 (8.44)    | 0.95 [0.26-3.46]          | 0.9416            | 0.28 [0.05-1.70]         | 0.1672            |
| <b>Total Number of Siblings</b>                         |             |               |                           |                   |                          |                   |
| 1                                                       | 58 (26.01)  | 450 (31.40)   | 1.00 [referent]           |                   | 1.00 [referent]          |                   |
| 2                                                       | 84 (37.67)  | 570 (39.78)   | 1.35 [0.57-3.19]          | 0.4887            | 1.26 [0.34-4.71]         | 0.7326            |
| 3                                                       | 38 (17.04)  | 276 (19.26)   | 1.14 [0.40-3.24]          | 0.8098            | 0.47 [0.08-2.70]         | 0.3953            |
| >3                                                      | 43 (19.28)  | 137 (9.56)    | <b>7.14 [2.24-22.72]</b>  | <b>0.0009</b>     | 2.52 [0.34-18.73]        | 0.3659            |
| <b>Sociodemographic</b>                                 |             |               |                           |                   |                          |                   |
| <b>Index of Relative Socioeconomic Disadvantage</b>     |             |               |                           |                   |                          |                   |
| Lowest Quintile                                         | 175 (78.48) | 1,198 (83.60) | 2.14 [0.76-6.02]          | 0.1510            | 0.68 [0.21-2.25]         | 0.5294            |
| > Lowest Quintile                                       | 39 (17.49)  | 198 (13.82)   | 1.00 [referent]           |                   | 1.00 [referent]          |                   |
| Unavailable                                             | 9 (4.04)    | 37 (2.58)     |                           |                   |                          |                   |

<sup>a</sup> Excluded from multivariable analysis due to small N.

<sup>b</sup> Age categories classified as; ≥3 years 10 months to <5 years and one month, 2) ≥5 years and one month to <5 years and 10 months (reference category), 3) ≥5 years and 10 months to <6 years 10 months.

1  
2  
3  
4  
5  
6  
7  
8  
9  
10  
11  
12  
13  
14  
15  
16  
17  
18  
19  
20  
21  
22  
23  
24  
25  
26  
27  
28  
29  
30  
31  
32  
33  
34  
35  
36  
37  
38  
39  
40  
41  
42  
43  
44  
45  
46  
47  
48  
49  
50  
51  
52  
53  
54  
55  
56  
57  
58  
59  
60

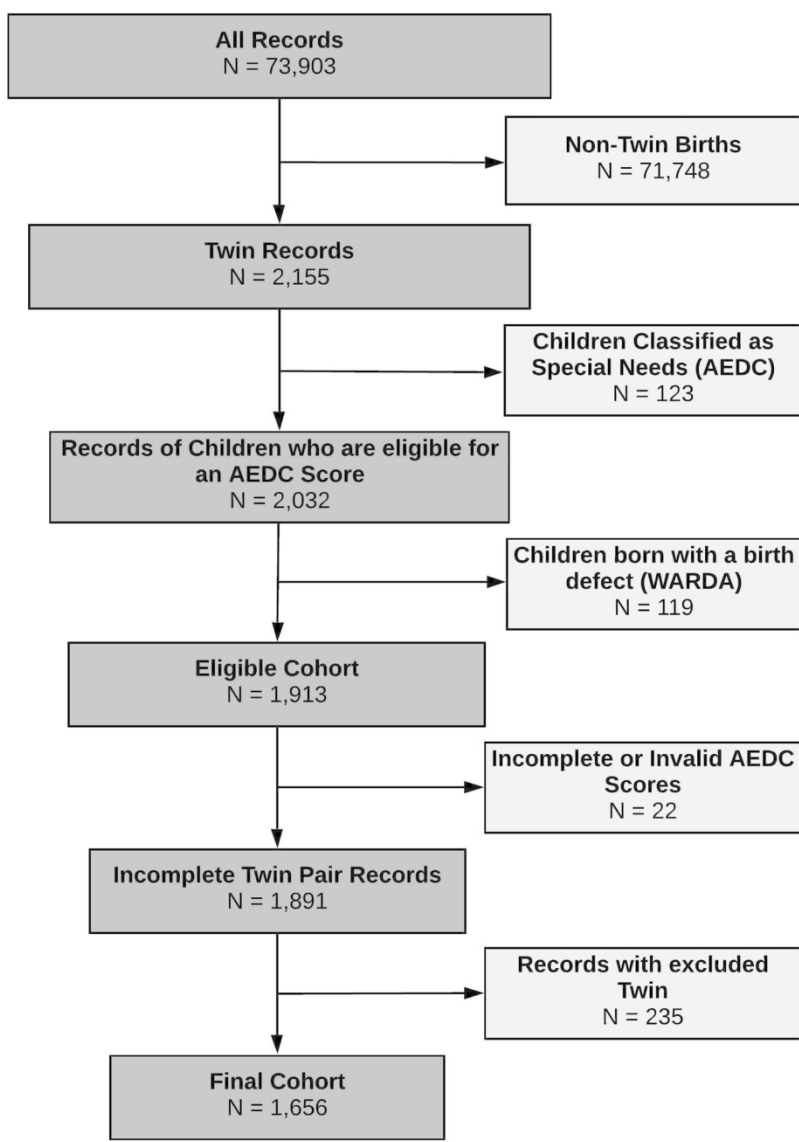

Figure 1. Eligible Cohort and Numbers Included for Analyses. AEDC = Australian Early Development Census. WARDA= Western Australian Register of Developmental Anomalies.

132x182mm (300 x 300 DPI)

## Supplementary Tables and Figures (Total: 5 tables, 0 figures)

Table 1. Risk Factors for Developmental Vulnerability on the Physical Health &amp; Wellbeing Domain.

| Characteristic                                            | DV<br>(N=188)<br>N (%) | NDV<br>(N=1,468)<br>N (%) | Bivariate                |                   | Multivariable<br>(N=1,352) |         |
|-----------------------------------------------------------|------------------------|---------------------------|--------------------------|-------------------|----------------------------|---------|
|                                                           |                        |                           | OR [95% CI]              | p-value           | aOR [95% CI]               | p-value |
| <b>Maternal</b>                                           |                        |                           |                          |                   |                            |         |
| <b>Age at Time of Child's Birth (years)</b>               |                        |                           |                          |                   |                            |         |
| <25                                                       | 46 (24.47)             | 176 (11.99)               | <b>5.36 [1.64-17.48]</b> | <b>0.0018</b>     | 3.59 [0.93-13.90]          | 0.0646  |
| 25-29                                                     | 39 (20.74)             | 345 (23.50)               | 1.00 [referent]          |                   | 1.00 [referent]            |         |
| 30-34                                                     | 62 (32.98)             | 544 (37.06)               | 1.08 [0.41-2.87]         | 0.6456            | 1.13 [0.39-3.25]           | 0.8209  |
| ≥35                                                       | 41 (21.81)             | 403 (27.45)               | 0.83 [0.29-2.38]         | 0.7761            | 0.97 [0.30-3.13]           | 0.9589  |
| <b>Marital Status</b>                                     |                        |                           |                          |                   |                            |         |
| Married (inc. de facto)                                   | 152 (80.85)            | 1,328 (90.46)             | 1.00 [referent]          |                   | 1.00 [referent]            |         |
| All Other                                                 | 36 (19.15)             | 134 (9.13)                | <b>5.54 [1.87-16.35]</b> | <b>0.0020</b>     | 2.39 [0.66-8.70]           | 0.1847  |
| Unavailable                                               | 0 (0.00)               | 6 (0.41)                  |                          |                   |                            |         |
| <b>Occupational Status Scale at Time of Child's Birth</b> |                        |                           |                          |                   |                            |         |
| 0-20                                                      | 52 (27.66)             | 257 (17.51)               | <b>3.29 [1.40-7.75]</b>  | <b>0.0250</b>     | 0.79 [0.28-2.27]           | 0.6631  |
| >20-100                                                   | 119 (63.30)            | 1,166 (79.43)             | 1.00 [referent]          |                   | 1.00 [referent]            |         |
| Unavailable                                               | 17 (9.04)              | 45 (3.07)                 |                          |                   |                            |         |
| <b>Pregnancy &amp; Birth</b>                              |                        |                           |                          |                   |                            |         |
| <b>Fertility Treatments</b>                               |                        |                           |                          |                   |                            |         |
| No                                                        | 163 (86.70)            | 1,225 (83.45)             | 1.00 [referent]          |                   | 1.00 [referent]            |         |
| Yes                                                       | 25 (13.30)             | 243 (16.55)               | 0.61 [0.21-1.75]         | 0.3594            | 1.07 [0.32-3.62]           | 0.9141  |
| <b>Smoking Status During Pregnancy</b>                    |                        |                           |                          |                   |                            |         |
| No                                                        | 134 (71.28)            | 1,284 (87.47)             | 1.00 [referent]          |                   | 1.00 [referent]            |         |
| Yes                                                       | 54 (28.72)             | 184 (12.53)               | <b>7.19 [2.76-18.70]</b> | <b>&lt;0.0001</b> | 2.49 [0.83-7.51]           | 0.1047  |
| <b>Pre-eclampsia</b>                                      |                        |                           |                          |                   |                            |         |
| No                                                        | 163 (86.70)            | 1,297 (88.35)             | 1.00 [referent]          |                   | 1.00 [referent]            |         |
| Yes                                                       | 25 (13.30)             | 171 (11.65)               | 1.56 [0.46-5.24]         | 0.4752            | 2.99 [0.90-9.91]           | 0.0736  |
| <b>Gestational Diabetes</b>                               |                        |                           |                          |                   |                            |         |
| No                                                        | 173 (92.02)            | 1,381 (94.07)             | 1.00 [referent]          |                   | 1.00 [referent]            |         |
| Yes                                                       | 15 (7.98)              | 87 (5.93)                 | 1.87 [0.36-9.87]         | 0.4596            | 2.26 [0.50-10.20]          | 0.2903  |
| <b>Threatened Abortion</b>                                |                        |                           |                          |                   |                            |         |
| No                                                        | 182 (96.81)            | 1,390 (94.69)             | 1.00 [referent]          |                   | 1.00 [referent]            |         |
| Yes                                                       | 6 (3.19)               | 78 (5.31)                 | 0.45 [0.07-2.71]         | 0.3787            | 0.43 [0.05-3.77]           | 0.4425  |
| <b>Other Pregnancy Related Complications</b>              |                        |                           |                          |                   |                            |         |
| No                                                        | 51 (27.13)             | 525 (35.76)               | 1.00 [referent]          |                   | 1.00 [referent]            |         |
| Yes                                                       | 137 (72.87)            | 943 (64.24)               | 1.96 [0.87-4.42]         | 0.1025            | 1.69 [0.65-4.42]           | 0.2835  |
| <b>Threatened Preterm Labour</b>                          |                        |                           |                          |                   |                            |         |
| No                                                        | 161 (85.64)            | 1,303 (88.76)             | 1.00 [referent]          |                   | 1.00 [referent]            |         |
| Yes                                                       | 27 (14.36)             | 165 (11.24)               | 1.68 [0.49-5.81]         | 0.4108            | 0.86 [0.26-2.82]           | 0.7969  |
| <b>APH</b>                                                |                        |                           |                          |                   |                            |         |
| No                                                        | 178 (94.68)            | 1,420 (96.73)             | 1.00 [referent]          |                   | 1.00 [referent]            |         |
| Yes                                                       | 10 (5.32)              | 48 (3.27)                 | 3.27 [0.37-28.63]        | 0.2850            | 0.73 [0.09-5.96]           | 0.7661  |
| <b>Placenta Praevia<sup>a</sup></b>                       |                        |                           |                          |                   |                            |         |
| No                                                        | 187 (99.47)            | 1,459 (99.39)             |                          |                   |                            |         |
| Yes                                                       | 1 (0.53)               | 9 (0.61)                  |                          |                   |                            |         |
| <b>Placental Abruption<sup>a</sup></b>                    |                        |                           |                          |                   |                            |         |
| No                                                        | 185 (98.40)            | 1,465 (99.8)              |                          |                   |                            |         |
| Yes                                                       | 3 (1.60)               | 3 (0.20)                  |                          |                   |                            |         |
| <b>Fetal Distress</b>                                     |                        |                           |                          |                   |                            |         |
| No                                                        | 162 (86.17)            | 1,356 (92.37)             | 1.00 [referent]          |                   | 1.00 [referent]            |         |
| Yes                                                       | 26 (13.83)             | 112 (7.63)                | <b>4.89 [1.20-19.90]</b> | <b>0.0267</b>     | 2.57 [0.72-9.19]           | 0.1450  |
| <b>Cephalopelvic Disproportion<sup>a</sup></b>            |                        |                           |                          |                   |                            |         |
| No                                                        | 188 (100.00)           | 1,464 (99.73)             |                          |                   |                            |         |
| Yes                                                       | 0 (0.00)               | 4 (0.27)                  |                          |                   |                            |         |
| <b>Prolapsed Cord<sup>a</sup></b>                         |                        |                           |                          |                   |                            |         |
| No                                                        | 188 (100.00)           | 1,455 (99.11)             |                          |                   |                            |         |

|                                                         |             |               |                           |               |                          |               |
|---------------------------------------------------------|-------------|---------------|---------------------------|---------------|--------------------------|---------------|
| Yes                                                     | 0 (0.00)    | 13 (0.89)     |                           |               |                          |               |
| <b>Precipitate Delivery<sup>a</sup></b>                 |             |               |                           |               |                          |               |
| No                                                      | 186 (98.94) | 1,444 (98.37) |                           |               |                          |               |
| Yes                                                     | 2 (1.06)    | 24 (1.63)     |                           |               |                          |               |
| <b>PPH ≥500mls</b>                                      |             |               |                           |               |                          |               |
| No                                                      | 124 (65.96) | 1,075 (73.23) | 1.00 [referent]           |               | 1.00 [referent]          |               |
| Yes                                                     | 64 (34.04)  | 393 (26.77)   | 2.16 [0.90-5.18]          | 0.0839        | 0.90 [0.36-2.25]         | 0.8256        |
| <b>TSR ≥2mins</b>                                       |             |               |                           |               |                          |               |
| No                                                      | 152 (80.85) | 1,272 (86.65) | 1.00 [referent]           |               | 1.00 [referent]          |               |
| Yes                                                     | 36 (19.15)  | 196 (13.35)   | 1.48 [0.64-3.44]          | 0.3631        | 0.55 [0.19-1.55]         | 0.2581        |
| <b>Apgar 5-minutes &lt;7<sup>a</sup></b>                |             |               |                           |               |                          |               |
| No                                                      | 182 (96.81) | 1,441 (98.16) |                           |               |                          |               |
| Yes                                                     | 6 (3.19)    | 27 (1.84)     |                           |               |                          |               |
| <b>Intubation</b>                                       |             |               |                           |               |                          |               |
| No                                                      | 147 (78.19) | 1,242 (84.60) | 1.00 [referent]           |               | 1.00 [referent]          |               |
| Yes                                                     | 41 (21.81)  | 226 (15.40)   | <b>2.33 [1.03-5.28]</b>   | <b>0.0427</b> | 1.96 [0.75-5.10]         | 0.1670        |
| <b>Early Preterm Birth</b>                              |             |               |                           |               |                          |               |
| No                                                      | 146 (77.66) | 1,264 (86.1)  | 1.00 [referent]           |               | 1.00 [referent]          |               |
| Yes                                                     | 42 (22.34)  | 204 (13.9)    | <b>3.76 [1.21-11.68]</b>  | <b>0.0223</b> | 2.15 [0.76-6.11]         | 0.1511        |
| <b>POBW &lt;15<sup>th</sup> Percentile</b>              |             |               |                           |               |                          |               |
| No                                                      | 125 (66.49) | 1,106 (75.34) | 1.00 [referent]           |               | 1.00 [referent]          |               |
| Yes                                                     | 42 (22.34)  | 175 (11.92)   | <b>3.44 [1.53-7.74]</b>   | <b>0.0029</b> | <b>2.58 [1.15-5.77]</b>  | <b>0.0216</b> |
| Unavailable                                             | 21 (11.17)  | 187 (12.74)   |                           |               |                          |               |
| <b>Parity</b>                                           |             |               |                           |               |                          |               |
| 0                                                       | 67 (35.64)  | 595 (40.53)   | 1.00 [referent]           |               | 1.00 [referent]          |               |
| 1                                                       | 65 (34.57)  | 518 (35.29)   | 1.18 [0.48-2.86]          | 0.7211        | 1.29 [0.41-4.08]         | 0.6653        |
| ≥2                                                      | 56 (29.79)  | 355 (24.18)   | 1.81 [0.67-4.91]          | 0.2443        | 1.53 [0.29-8.17]         | 0.6173        |
| <b>Child</b>                                            |             |               |                           |               |                          |               |
| <b>Sex</b>                                              |             |               |                           |               |                          |               |
| Female                                                  | 82 (43.62)  | 768 (52.32)   | 1.00 [referent]           |               | 1.00 [referent]          |               |
| Male                                                    | 106 (56.38) | 700 (47.68)   | <b>2.50 [1.36-4.61]</b>   | <b>0.0034</b> | <b>3.31 [1.64-6.69]</b>  | <b>0.0009</b> |
| <b>Ethnicity</b>                                        |             |               |                           |               |                          |               |
| Other                                                   | 167 (88.83) | 1,405 (95.71) | 1.00 [referent]           |               | 1.00 [referent]          |               |
| Indigenous Australian                                   | 21 (11.17)  | 63 (4.29)     | <b>12.56 [2.12-74.52]</b> | <b>0.0054</b> | 0.80 [0.12-5.40]         | 0.8160        |
| <b>Child Speaks Language Other Than English at Home</b> |             |               |                           |               |                          |               |
| No                                                      | 159 (84.57) | 1,357 (92.44) | 1.00 [referent]           |               | 1.00 [referent]          |               |
| Yes                                                     | 29 (15.43)  | 111 (7.56)    | <b>4.62 [1.24-17.26]</b>  | <b>0.0230</b> | <b>4.84 [1.34-17.48]</b> | <b>0.0162</b> |
| <b>Age Category at Time of AEDC Completion</b>          |             |               |                           |               |                          |               |
| 1                                                       | 50 (26.60)  | 271 (18.46)   | <b>2.76 [1.02-7.46]</b>   | <b>0.0008</b> | 2.22 [0.88-5.60]         | 0.0917        |
| 2                                                       | 129 (68.62) | 1,070 (72.89) | 1.00 [referent]           |               | 1.00 [referent]          |               |
| 3                                                       | 9 (4.79)    | 127 (8.65)    | 0.44 [0.10-1.93]          | 0.9416        | 0.19 [0.03-1.18]         | 0.0739        |
| <b>Total Number of Siblings</b>                         |             |               |                           |               |                          |               |
| 1                                                       | 51 (27.13)  | 457 (31.13)   | 1.00 [referent]           |               | 1.00 [referent]          |               |
| 2                                                       | 69 (36.70)  | 585 (39.85)   | 1.10 [0.46-2.63]          | 0.8273        | 0.98 [0.30-3.15]         | 0.9697        |
| 3                                                       | 24 (12.77)  | 290 (19.75)   | 0.51 [0.16-1.57]          | 0.2387        | 0.41 [0.08-2.10]         | 0.2836        |
| >3                                                      | 44 (23.40)  | 136 (9.26)    | <b>8.32 [2.57-26.96]</b>  | <b>0.0004</b> | 6.47 [0.98-42.75]        | 0.0525        |
| <b>Sociodemographic</b>                                 |             |               |                           |               |                          |               |
| <b>Index of Relative Socioeconomic Disadvantage</b>     |             |               |                           |               |                          |               |
| Lowest Quintile                                         | 138 (73.40) | 1,235 (84.13) | <b>3.78 [1.17-12.22]</b>  | <b>0.0261</b> | 1.85 [0.63-5.44]         | 0.2639        |
| > Lowest Quintile                                       | 40 (21.28)  | 197 (13.42)   | 1.00 [referent]           |               | 1.00 [referent]          |               |
| Unavailable                                             | 10 (5.32)   | 36 (2.45)     |                           |               |                          |               |

<sup>a</sup> Excluded from multivariable analysis due to small N.

<sup>b</sup> Age categories classified as; ≥3 years 10 months to <5 years and one month, 2) ≥5 years and one month to <5 years and 10 months (reference category), 3) ≥5 years and 10 months to <6 years 10 months.



Table 2. Risk Factors for Developmental Vulnerability on the Social Competence Domain.

| Characteristic                                            | DV<br>(N=151)<br>N (%) | NDV<br>(N=1,505)<br>N (%) | Bivariate                |                   | Multivariable<br>(N=1,352) |               |
|-----------------------------------------------------------|------------------------|---------------------------|--------------------------|-------------------|----------------------------|---------------|
|                                                           |                        |                           | OR [95% CI]              | p-value           | aOR [95% CI]               | p-value       |
| <b>Maternal</b>                                           |                        |                           |                          |                   |                            |               |
| <b>Age at Time of Child's Birth (years)</b>               |                        |                           |                          |                   |                            |               |
| <25                                                       | 43 (28.48)             | 179 (11.89)               | <b>6.32 [1.91-20.95]</b> | <b>0.0026</b>     | 3.13 [0.74-13.30]          | 0.1219        |
| 25-29                                                     | 31 (20.53)             | 353 (23.46)               | 1.00 [referent]          |                   | 1.00 [referent]            |               |
| 30-34                                                     | 44 (29.14)             | 562 (37.34)               | 0.78 [0.29-2.15]         | 0.6340            | 1.36 [0.43-4.36]           | 0.6038        |
| ≥35                                                       | 33 (21.85)             | 411 (27.31)               | 0.81 [0.27-2.37]         | 0.6955            | 0.99 [0.27-3.59]           | 0.9822        |
| <b>Marital Status</b>                                     |                        |                           |                          |                   |                            |               |
| Married (inc. de facto)                                   | 113 (74.83)            | 1,367 (90.83)             | 1.00 [referent]          |                   | 1.00 [referent]            |               |
| All Other                                                 | 36 (23.84)             | 134 (8.90)                | <b>9.65 [3.20-29.05]</b> | <b>&lt;0.0001</b> | <b>10.16 [2.56-40.41]</b>  | <b>0.0010</b> |
| Unavailable                                               | 2 (1.32)               | 4 (0.27)                  |                          |                   |                            |               |
| <b>Occupational Status Scale at Time of Child's Birth</b> |                        |                           |                          |                   |                            |               |
| 0-20                                                      | 50 (33.11)             | 259 (17.21)               | <b>5.05 [2.07-12.29]</b> | <b>0.0004</b>     | 1.93 [0.64-5.79]           | 0.2414        |
| >20-100                                                   | 94 (62.25)             | 1,191 (79.14)             | 1.00 [referent]          |                   | 1.00 [referent]            |               |
| Unavailable                                               | 7 (4.64)               | 55 (3.65)                 |                          |                   |                            |               |
| <b>Pregnancy &amp; Birth</b>                              |                        |                           |                          |                   |                            |               |
| <b>Fertility Treatments</b>                               |                        |                           |                          |                   |                            |               |
| No                                                        | 132 (87.42)            | 1,256 (83.46)             | 1.00 [referent]          |                   | 1.00 [referent]            |               |
| Yes                                                       | 19 (12.58)             | 249 (16.54)               | 0.54 [0.18-1.60]         | 0.2688            | 1.38 [0.37-5.17]           | 0.6347        |
| <b>Smoking Status During Pregnancy</b>                    |                        |                           |                          |                   |                            |               |
| No                                                        | 116 (76.82)            | 1,302 (86.51)             | 1.00 [referent]          |                   | 1.00 [referent]            |               |
| Yes                                                       | 35 (23.18)             | 203 (13.49)               | <b>3.70 [1.06-12.91]</b> | <b>0.0406</b>     | 1.22 [0.35-4.20]           | 0.7525        |
| <b>Pre-eclampsia</b>                                      |                        |                           |                          |                   |                            |               |
| No                                                        | 134 (88.74)            | 1,326 (88.11)             | 1.00 [referent]          |                   | 1.00 [referent]            |               |
| Yes                                                       | 17 (11.26)             | 179 (11.89)               | 0.98 [0.31-3.14]         | 0.9754            | 1.84 [0.49-6.84]           | 0.3645        |
| <b>Gestational Diabetes</b>                               |                        |                           |                          |                   |                            |               |
| No                                                        | 140 (92.72)            | 1,414 (93.95)             | 1.00 [referent]          |                   | 1.00 [referent]            |               |
| Yes                                                       | 11 (7.28)              | 91 (6.05)                 | 1.46 [0.32-6.60]         | 0.6268            | 2.11 [0.41-10.74]          | 0.3692        |
| <b>Threatened Abortion</b>                                |                        |                           |                          |                   |                            |               |
| No                                                        | 144 (95.36)            | 1,428 (94.88)             | 1.00 [referent]          |                   | 1.00 [referent]            |               |
| Yes                                                       | 7 (4.64)               | 77 (5.12)                 | 0.66 [0.11-4.10]         | 0.6579            | 0.13 [0.01-2.43]           | 0.1714        |
| <b>Other Pregnancy Related Complications</b>              |                        |                           |                          |                   |                            |               |
| No                                                        | 38 (25.17)             | 538 (35.75)               | 1.00 [referent]          |                   | 1.00 [referent]            |               |
| Yes                                                       | 113 (74.83)            | 967 (64.25)               | 2.15 [0.89-5.19]         | 0.0884            | 2.00 [0.70-5.74]           | 0.1960        |
| <b>Threatened Preterm Labour</b>                          |                        |                           |                          |                   |                            |               |
| No                                                        | 131 (86.75)            | 1,333 (88.57)             | 1.00 [referent]          |                   | 1.00 [referent]            |               |
| Yes                                                       | 20 (13.25)             | 172 (11.43)               | 1.32 [0.42-4.17]         | 0.6403            | 0.69 [0.19-2.59]           | 0.5839        |
| <b>APH</b>                                                |                        |                           |                          |                   |                            |               |
| No                                                        | 142 (94.04)            | 1,456 (96.74)             | 1.00 [referent]          |                   | 1.00 [referent]            |               |
| Yes                                                       | 9 (5.96)               | 49 (3.26)                 | 3.74 [0.62-22.66]        | 0.1507            | 2.12 [0.27-16.50]          | 0.4734        |
| <b>Placenta Praevia<sup>a</sup></b>                       |                        |                           |                          |                   |                            |               |
| No                                                        | 151 (100.00)           | 1,495 (99.34)             |                          |                   |                            |               |
| Yes                                                       | 0 (0.00)               | 10 (0.66)                 |                          |                   |                            |               |
| <b>Placental Abruption<sup>a</sup></b>                    |                        |                           |                          |                   |                            |               |
| No                                                        | 149 (98.68)            | 1,501 (99.73)             |                          |                   |                            |               |
| Yes                                                       | 2 (1.32)               | 4 (0.27)                  |                          |                   |                            |               |
| <b>Fetal Distress</b>                                     |                        |                           |                          |                   |                            |               |
| No                                                        | 132 (87.42)            | 1,386 (92.09)             | 1.00 [referent]          |                   | 1.00 [referent]            |               |
| Yes                                                       | 19 (12.58)             | 119 (7.91)                | 2.77 [0.81-9.50]         | 0.1045            | 1.39 [0.33-5.82]           | 0.6558        |
| <b>Cephalopelvic Disproportion<sup>a</sup></b>            |                        |                           |                          |                   |                            |               |
| No                                                        | 151 (100.00)           | 1,501 (99.73)             |                          |                   |                            |               |
| Yes                                                       | 0 (0.00)               | 4 (0.27)                  |                          |                   |                            |               |
| <b>Prolapsed Cord<sup>a</sup></b>                         |                        |                           |                          |                   |                            |               |
| No                                                        | 148 (98.01)            | 1,495 (99.34)             |                          |                   |                            |               |
| Yes                                                       | 3 (1.99)               | 10 (0.66)                 |                          |                   |                            |               |

|                                                            |             |               |                          |                   |                          |                   |
|------------------------------------------------------------|-------------|---------------|--------------------------|-------------------|--------------------------|-------------------|
| <b>Precipitate Delivery<sup>a</sup></b>                    |             |               |                          |                   |                          |                   |
| No                                                         | 149 (98.68) | 1,481 (98.41) |                          |                   |                          |                   |
| Yes                                                        | 2 (1.32)    | 24 (1.59)     |                          |                   |                          |                   |
| <b>PPH ≥500mls</b>                                         |             |               |                          |                   |                          |                   |
| No                                                         | 96 (63.58)  | 1,103 (73.29) | 1.00 [referent]          |                   | 1.00 [referent]          |                   |
| Yes                                                        | 55 (36.42)  | 402 (26.71)   | <b>2.61 [1.14-5.97]</b>  | <b>0.0233</b>     | 1.42 [0.54-3.76]         | 0.4770            |
| <b>TSR ≥2mins</b>                                          |             |               |                          |                   |                          |                   |
| No                                                         | 119 (78.81) | 1,305 (86.71) | 1.00 [referent]          |                   | 1.00 [referent]          |                   |
| Yes                                                        | 32 (21.19)  | 200 (13.29)   | 1.76 [0.80-3.89]         | 0.1607            | 0.80 [0.26-2.46]         | 0.6967            |
| <b>Appar 5-minutes &lt;7<sup>a</sup></b>                   |             |               |                          |                   |                          |                   |
| No                                                         | 147 (97.35) | 1,476 (98.07) |                          |                   |                          |                   |
| Yes                                                        | 4 (2.65)    | 29 (1.93)     |                          |                   |                          |                   |
| <b>Intubation</b>                                          |             |               |                          |                   |                          |                   |
| No                                                         | 112 (74.17) | 1,277 (84.85) | 1.00 [referent]          |                   | 1.00 [referent]          |                   |
| Yes                                                        | 39 (25.83)  | 228 (15.15)   | 2.31 [1.00-5.33]         | 0.0505            | 2.48 [0.86-7.20]         | 0.0934            |
| <b>Early Preterm Birth</b>                                 |             |               |                          |                   |                          |                   |
| No                                                         | 123 (81.46) | 1,287 (85.51) | 1.00 [referent]          |                   | 1.00 [referent]          |                   |
| Yes                                                        | 28 (18.54)  | 218 (14.49)   | 1.64 [0.59-4.57]         | 0.3453            | 0.68 [0.20-2.27]         | 0.5254            |
| <b>POBW &lt;15<sup>th</sup> Percentile</b>                 |             |               |                          |                   |                          |                   |
| No                                                         | 114 (75.5)  | 1,117 (74.22) | 1.00 [referent]          |                   | 1.00 [referent]          |                   |
| Yes                                                        | 23 (15.23)  | 194 (12.89)   | 1.51 [0.65-3.54]         | 0.3408            | 1.65 [0.63-4.30]         | 0.3039            |
| Unavailable                                                | 14 (9.27)   | 194 (12.89)   |                          |                   |                          |                   |
| <b>Parity</b>                                              |             |               |                          |                   |                          |                   |
| 0                                                          | 58 (38.41)  | 604 (40.13)   | 1.00 [referent]          |                   | 1.00 [referent]          |                   |
| 1                                                          | 49 (32.45)  | 534 (35.48)   | 1.06 [0.44-2.56]         | 0.9059            | 0.87 [0.25-3.08]         | 0.8268            |
| ≥2                                                         | 44 (29.14)  | 367 (24.39)   | 1.73 [0.67-4.50]         | 0.2588            | 2.02 [0.35-11.63]        | 0.4317            |
| <b>Child</b>                                               |             |               |                          |                   |                          |                   |
| <b>Sex</b>                                                 |             |               |                          |                   |                          |                   |
| Female                                                     | 51 (33.77)  | 799 (53.09)   | 1.00 [referent]          |                   | 1.00 [referent]          |                   |
| Male                                                       | 100 (66.23) | 706 (46.91)   | <b>5.21 [2.58-10.52]</b> | <b>&lt;0.0001</b> | <b>5.35 [2.38-12.00]</b> | <b>&lt;0.0001</b> |
| <b>Ethnicity</b>                                           |             |               |                          |                   |                          |                   |
| Other                                                      | 137 (90.73) | 1,435 (95.35) | 1.00 [referent]          |                   | 1.00 [referent]          |                   |
| Indigenous Australian                                      | 14 (9.27)   | 70 (4.65)     | 3.96 [0.86-18.29]        | 0.0777            | 2.43 [0.36-16.63]        | 0.3644            |
| <b>Child Speaks Language Other Than English at Home</b>    |             |               |                          |                   |                          |                   |
| No                                                         | 139 (92.05) | 1,377 (91.50) | 1.00 [referent]          |                   | 1.00 [referent]          |                   |
| Yes                                                        | 12 (7.95)   | 128 (8.50)    | 0.67 [0.17-2.62]         | 0.5667            | 1.13 [0.24-5.18]         | 0.8797            |
| <b>Age Category at Time of AEDC Completion<sup>b</sup></b> |             |               |                          |                   |                          |                   |
| 1                                                          | 40 (26.49)  | 281 (18.67)   | 2.42 [0.98-5.94]         | 0.0547            | <b>2.84 [1.05-7.73]</b>  | <b>0.0406</b>     |
| 2                                                          | 98 (64.9)   | 1,101 (73.16) | 1.00 [referent]          |                   | 1.00 [referent]          |                   |
| 3                                                          | 13 (8.61)   | 123 (8.17)    | 1.73 [0.46-6.48]         | 0.4174            | 0.51 [0.09-2.75]         | 0.4309            |
| <b>Total Number of Siblings</b>                            |             |               |                          |                   |                          |                   |
| 1                                                          | 41 (27.15)  | 467 (31.03)   | 1.00 [referent]          |                   | 1.00 [referent]          |                   |
| 2                                                          | 57 (37.75)  | 597 (39.67)   | 1.27 [0.50-3.23]         | 0.6133            | 1.97 [0.52-7.49]         | 0.3223            |
| 3                                                          | 27 (17.88)  | 287 (19.07)   | 1.27 [0.41-3.91]         | 0.6779            | 0.91 [0.16-5.21]         | 0.9149            |
| >3                                                         | 26 (17.22)  | 154 (10.23)   | <b>4.06 [1.14-14.39]</b> | <b>0.0303</b>     | 2.53 [0.33-19.66]        | 0.3737            |
| <b>Sociodemographic</b>                                    |             |               |                          |                   |                          |                   |
| <b>Index of Relative Socioeconomic Disadvantage</b>        |             |               |                          |                   |                          |                   |
| Lowest Quintile                                            | 118 (78.15) | 1,255 (83.39) | 1.67 [0.59-4.74]         | 0.3362            | 0.72 [0.21-2.45]         | 0.5956            |
| > Lowest Quintile                                          | 26 (17.22)  | 211 (14.02)   | 1.00 [referent]          |                   | 1.00 [referent]          |                   |
| Unavailable                                                | 7 (4.64)    | 39 (2.59)     |                          |                   |                          |                   |

<sup>a</sup> Excluded from multivariable analysis due to small N.

<sup>b</sup> Age categories classified as; ≥3 years 10 months to <5 years and one month, 2) ≥5 years and one month to <5 years and 10 months (reference category), 3) ≥5 years and 10 months to <6 years 10 months.



Table 3. Risk Factors for Developmental Vulnerability on the Emotional Maturity Domain.

| Characteristic                                            | DV<br>(N=147)<br>N (%) | NDV<br>(N=1,509)<br>N (%) | Bivariate               |                   | Multivariable<br>(N=1,352) |               |
|-----------------------------------------------------------|------------------------|---------------------------|-------------------------|-------------------|----------------------------|---------------|
|                                                           |                        |                           | OR [95% CI]             | p-value           | aOR [95% CI]               | p-value       |
| <b>Maternal</b>                                           |                        |                           |                         |                   |                            |               |
| <b>Age at Time of Child's Birth (years)</b>               |                        |                           |                         |                   |                            |               |
| <25                                                       | 39 (26.53)             | 183 (12.13)               | <b>3.14 [1.44-6.89]</b> | <b>0.0042</b>     | 1.89 [0.70-5.05]           | 0.2063        |
| 25-29                                                     | 31 (21.09)             | 353 (23.39)               | 1.00 [referent]         |                   | 1.00 [referent]            |               |
| 30-34                                                     | 38 (25.85)             | 568 (37.64)               | 0.70 [0.35-1.40]        | 0.3113            | 1.03 [0.46-2.34]           | 0.9373        |
| ≥35                                                       | 39 (26.53)             | 405 (26.84)               | 1.12 [0.55-2.27]        | 0.7615            | 1.16 [0.48-2.81]           | 0.7415        |
| <b>Marital Status</b>                                     |                        |                           |                         |                   |                            |               |
| Married (inc. de facto)                                   | 111 (75.51)            | 1,369 (90.72)             | 1.00 [referent]         |                   | 1.00 [referent]            |               |
| All Other                                                 | 34 (23.13)             | 136 (9.01)                | <b>4.58 [2.26-9.27]</b> | <b>&lt;0.0001</b> | <b>3.77 [1.48-9.58]</b>    | <b>0.0055</b> |
| Unavailable                                               | 2 (1.36)               | 4 (0.27)                  |                         |                   |                            |               |
| <b>Occupational Status Scale at Time of Child's Birth</b> |                        |                           |                         |                   |                            |               |
| 0-20                                                      | 45 (30.61)             | 264 (17.50)               | <b>2.62 [1.46-4.72]</b> | <b>0.0014</b>     | 1.85 [0.86-3.97]           | 0.1131        |
| >20-100                                                   | 95 (64.63)             | 1,190 (78.86)             | 1.00 [referent]         |                   | 1.00 [referent]            |               |
| Unavailable                                               | 7 (4.76)               | 55 (3.64)                 |                         |                   |                            |               |
| <b>Pregnancy &amp; Birth</b>                              |                        |                           |                         |                   |                            |               |
| <b>Fertility Treatments</b>                               |                        |                           |                         |                   |                            |               |
| No                                                        | 126 (85.71)            | 1,262 (83.63)             | 1.00 [referent]         |                   | 1.00 [referent]            |               |
| Yes                                                       | 21 (14.29)             | 247 (16.37)               | 0.81 [0.40-1.66]        | 0.5666            | 1.03 [0.42-2.53]           | 0.9569        |
| <b>Smoking Status During Pregnancy</b>                    |                        |                           |                         |                   |                            |               |
| No                                                        | 118 (80.27)            | 1,300 (86.15)             | 1.00 [referent]         |                   | 1.00 [referent]            |               |
| Yes                                                       | 29 (19.73)             | 209 (13.85)               | 1.70 [0.86-3.36]        | 0.1304            | 0.82 [0.33-2.02]           | 0.6620        |
| <b>Pre-eclampsia</b>                                      |                        |                           |                         |                   |                            |               |
| No                                                        | 129 (87.76)            | 1,331 (88.20)             | 1.00 [referent]         |                   | 1.00 [referent]            |               |
| Yes                                                       | 18 (12.24)             | 178 (11.80)               | 1.09 [0.50-2.40]        | 0.8272            | 1.87 [0.75-4.63]           | 0.1764        |
| <b>Gestational Diabetes</b>                               |                        |                           |                         |                   |                            |               |
| No                                                        | 138 (93.88)            | 1,416 (93.84)             | 1.00 [referent]         |                   | 1.00 [referent]            |               |
| Yes                                                       | 9 (6.12)               | 93 (6.16)                 | 1.02 [0.35-2.97]        | 0.9752            | 1.18 [0.37-3.76]           | 0.7845        |
| <b>Threatened Abortion</b>                                |                        |                           |                         |                   |                            |               |
| No                                                        | 140 (95.24)            | 1,432 (94.90)             | 1.00 [referent]         |                   | 1.00 [referent]            |               |
| Yes                                                       | 7 (4.76)               | 77 (5.10)                 | 0.91 [0.28-3.03]        | 0.8823            | 0.09 [0.01-1.06]           | 0.0553        |
| <b>Other Pregnancy Related Complications</b>              |                        |                           |                         |                   |                            |               |
| No                                                        | 35 (23.81)             | 541 (35.85)               | 1.00 [referent]         |                   | 1.00 [referent]            |               |
| Yes                                                       | 112 (76.19)            | 968 (64.15)               | <b>2.13 [1.20-3.80]</b> | <b>0.0101</b>     | 1.80 [0.86-3.78]           | 0.1208        |
| <b>Threatened Preterm Labour</b>                          |                        |                           |                         |                   |                            |               |
| No                                                        | 125 (85.03)            | 1,339 (88.73)             | 1.00 [referent]         |                   | 1.00 [referent]            |               |
| Yes                                                       | 22 (14.97)             | 170 (11.27)               | 1.52 [0.72-3.25]        | 0.2742            | 1.21 [0.51-2.85]           | 0.6642        |
| <b>APH</b>                                                |                        |                           |                         |                   |                            |               |
| No                                                        | 139 (94.56)            | 1,459 (96.69)             | 1.00 [referent]         |                   | 1.00 [referent]            |               |
| Yes                                                       | 8 (5.44)               | 50 (3.31)                 | 2.13 [0.62-7.31]        | 0.2304            | 0.67 [0.13-3.31]           | 0.6180        |
| <b>Placenta Praevia<sup>a</sup></b>                       |                        |                           |                         |                   |                            |               |
| No                                                        | 146 (99.32)            | 1,500 (99.40)             |                         |                   |                            |               |
| Yes                                                       | 1 (0.68)               | 9 (0.60)                  |                         |                   |                            |               |
| <b>Placental Abruption<sup>a</sup></b>                    |                        |                           |                         |                   |                            |               |
| No                                                        | 145 (98.64)            | 1,505 (99.73)             |                         |                   |                            |               |
| Yes                                                       | 2 (1.36)               | 4 (0.27)                  |                         |                   |                            |               |
| <b>Fetal Distress</b>                                     |                        |                           |                         |                   |                            |               |
| No                                                        | 128 (87.07)            | 1,390 (92.11)             | 1.00 [referent]         |                   | 1.00 [referent]            |               |
| Yes                                                       | 19 (12.93)             | 119 (7.89)                | 1.95 [0.86-4.44]        | 0.1107            | 1.09 [0.40-2.93]           | 0.8689        |
| <b>Cephalopelvic Disproportion<sup>a</sup></b>            |                        |                           |                         |                   |                            |               |
| No                                                        | 147 (100.00)           | 1,505 (99.73)             |                         |                   |                            |               |
| Yes                                                       | 0 (0.00)               | 4 (0.27)                  |                         |                   |                            |               |
| <b>Prolapsed Cord<sup>a</sup></b>                         |                        |                           |                         |                   |                            |               |
| No                                                        | 145 (98.64)            | 1,498 (99.27)             |                         |                   |                            |               |
| Yes                                                       | 2 (1.36)               | 11 (0.73)                 |                         |                   |                            |               |

|                                                            |             |               |                           |                   |                          |                   |
|------------------------------------------------------------|-------------|---------------|---------------------------|-------------------|--------------------------|-------------------|
| <b>Precipitate Delivery<sup>a</sup></b>                    |             |               |                           |                   |                          |                   |
| No                                                         | 146 (99.32) | 1,484 (98.34) |                           |                   |                          |                   |
| Yes                                                        | 1 (0.68)    | 25 (1.66)     |                           |                   |                          |                   |
| <b>PPH ≥500mls</b>                                         |             |               |                           |                   |                          |                   |
| No                                                         | 95 (64.63)  | 1,104 (73.16) | 1.00 [referent]           |                   | 1.00 [referent]          |                   |
| Yes                                                        | 52 (35.37)  | 405 (26.84)   | <b>1.75 [1.01-3.05]</b>   | <b>0.0473</b>     | 1.03 [0.52-2.03]         | 0.9320            |
| <b>TSR ≥2mins</b>                                          |             |               |                           |                   |                          |                   |
| No                                                         | 119 (80.95) | 1,305 (86.48) | 1.00 [referent]           |                   | 1.00 [referent]          |                   |
| Yes                                                        | 28 (19.05)  | 204 (13.52)   | 1.69 [0.91-3.15]          | 0.0963            | 1.12 [0.45-2.74]         | 0.8123            |
| <b>Appar 5-minutes &lt;7<sup>a</sup></b>                   |             |               |                           |                   |                          |                   |
| No                                                         | 143 (97.28) | 1,480 (98.08) |                           |                   |                          |                   |
| Yes                                                        | 4 (2.72)    | 29 (1.92)     |                           |                   |                          |                   |
| <b>Intubation</b>                                          |             |               |                           |                   |                          |                   |
| No                                                         | 114 (77.55) | 1,275 (84.49) | 1.00 [referent]           |                   | 1.00 [referent]          |                   |
| Yes                                                        | 33 (22.45)  | 234 (15.51)   | 1.78 [0.98-3.21]          | 0.0572            | 1.48 [0.63-3.49]         | 0.3664            |
| <b>Early Preterm Birth</b>                                 |             |               |                           |                   |                          |                   |
| No                                                         | 119 (80.95) | 1,291 (85.55) | 1.00 [referent]           |                   | 1.00 [referent]          |                   |
| Yes                                                        | 28 (19.05)  | 218 (14.45)   | 1.51 [0.76-3.00]          | 0.2372            | 0.95 [0.42-2.13]         | 0.8986            |
| <b>POBW &lt;15<sup>th</sup> Percentile</b>                 |             |               |                           |                   |                          |                   |
| No                                                         | 106 (72.11) | 1,125 (74.55) | 1.00 [referent]           |                   | 1.00 [referent]          |                   |
| Yes                                                        | 24 (16.33)  | 193 (12.79)   | 1.48 [0.76-2.87]          | 0.2519            | 1.59 [0.77-3.30]         | 0.2103            |
| Unavailable                                                | 17 (11.56)  | 191 (12.66)   |                           |                   |                          |                   |
| <b>Parity</b>                                              |             |               |                           |                   |                          |                   |
| 0                                                          | 61 (41.5)   | 601 (39.83)   | 1.00 [referent]           |                   | 1.00 [referent]          |                   |
| 1                                                          | 52 (35.37)  | 531 (35.19)   | 0.99 [0.55-1.78]          | 0.9677            | 0.86 [0.36-2.03]         | 0.7233            |
| ≥2                                                         | 34 (23.13)  | 377 (24.98)   | 0.89 [0.46-1.72]          | 0.7269            | 0.84 [0.24-2.95]         | 0.7858            |
| <b>Child</b>                                               |             |               |                           |                   |                          |                   |
| <b>Sex</b>                                                 |             |               |                           |                   |                          |                   |
| Female                                                     | 32 (21.77)  | 818 (54.21)   | 1.00 [referent]           |                   | 1.00 [referent]          |                   |
| Male                                                       | 115 (78.23) | 691 (45.79)   | <b>10.13 [4.94-20.79]</b> | <b>&lt;0.0001</b> | <b>9.37 [4.42-19.87]</b> | <b>&lt;0.0001</b> |
| <b>Ethnicity</b>                                           |             |               |                           |                   |                          |                   |
| Other                                                      | 131 (89.12) | 1,441 (95.49) | 1.00 [referent]           |                   | 1.00 [referent]          |                   |
| Indigenous Australian                                      | 16 (10.88)  | 68 (4.51)     | <b>3.62 [1.36-9.62]</b>   | <b>0.0101</b>     | <b>5.61 [1.48-21.31]</b> | <b>0.0115</b>     |
| <b>Child Speaks Language Other Than English at Home</b>    |             |               |                           |                   |                          |                   |
| No                                                         | 135 (91.84) | 1,381 (91.52) | 1.00 [referent]           |                   | 1.00 [referent]          |                   |
| Yes                                                        | 12 (8.16)   | 128 (8.48)    | 1.00 [0.40-2.49]          | 0.9937            | 1.02 [0.34-3.04]         | 0.9749            |
| <b>Age Category at Time of AEDC Completion<sup>b</sup></b> |             |               |                           |                   |                          |                   |
| 1                                                          | 37 (25.17)  | 284 (18.82)   | 1.57 [0.85-2.90]          | 0.1475            | 1.38 [0.68-2.80]         | 0.3767            |
| 2                                                          | 102 (69.39) | 1,097 (72.7)  | 1.00 [referent]           |                   | 1.00 [referent]          |                   |
| 3                                                          | 8 (5.44)    | 128 (8.48)    | 0.62 [0.22-1.77]          | 0.3720            | 0.31 [0.08-1.17]         | 0.0846            |
| <b>Total Number of Siblings</b>                            |             |               |                           |                   |                          |                   |
| 1                                                          | 45 (30.61)  | 463 (30.68)   | 1.00 [referent]           |                   | 1.00 [referent]          |                   |
| 2                                                          | 59 (40.14)  | 595 (39.43)   | 1.05 [0.57-1.95]          | 0.8726            | 1.72 [0.69-4.25]         | 0.2413            |
| 3                                                          | 22 (14.97)  | 292 (19.35)   | 0.71 [0.32-1.57]          | 0.4004            | 0.95 [0.28-3.24]         | 0.9354            |
| >3                                                         | 21 (14.29)  | 159 (10.54)   | 1.62 [0.69-3.80]          | 0.2700            | 1.93 [0.46-8.19]         | 0.3703            |
| <b>Sociodemographic</b>                                    |             |               |                           |                   |                          |                   |
| <b>Index of Relative Socioeconomic Disadvantage</b>        |             |               |                           |                   |                          |                   |
| Lowest Quintile                                            | 118 (80.27) | 1,255 (83.17) | 1.08 [0.54-2.17]          | 0.8345            | 0.58 [0.24-1.43]         | 0.2376            |
| > Lowest Quintile                                          | 22 (14.97)  | 215 (14.25)   | 1.00 [referent]           |                   | 1.00 [referent]          |                   |
| Unavailable                                                | 7 (4.76)    | 39 (2.58)     |                           |                   |                          |                   |

<sup>a</sup> Excluded from multivariable analysis due to small N.

<sup>b</sup> Age categories classified as; ≥3 years 10 months to <5 years and one month, 2) ≥5 years and one month to <5 years and 10 months (reference category), 3) ≥5 years and 10 months to <6 years 10 months.

Table 4. Risk Factors for Developmental Vulnerability on the Language &amp; Cognitive Skills (school-based) Domain.

| Characteristic                                            | DV<br>(N=195)<br>N (%) | NDV<br>(N=1,461)<br>N (%) | Bivariate                 |                   | Multivariable<br>(N=1,352) |               |
|-----------------------------------------------------------|------------------------|---------------------------|---------------------------|-------------------|----------------------------|---------------|
|                                                           |                        |                           | OR [95% CI]               | p-value           | aOR [95% CI]               | p-value       |
| <b>Maternal</b>                                           |                        |                           |                           |                   |                            |               |
| <b>Age at Time of Child's Birth (years)</b>               |                        |                           |                           |                   |                            |               |
| <25                                                       | 68 (34.87)             | 154 (10.54)               | <b>18.41 [5.21-65.05]</b> | <b>&lt;0.0001</b> | <b>12.90 [2.81-59.16]</b>  | <b>0.0010</b> |
| 25-29                                                     | 38 (19.49)             | 346 (23.68)               | 1.00 [referent]           |                   | 1.00 [referent]            |               |
| 30-34                                                     | 52 (26.67)             | 554 (37.92)               | 0.72 [0.25-2.02]          | 0.5279            | 0.80 [0.24-2.67]           | 0.7162        |
| ≥35                                                       | 37 (18.97)             | 407 (27.86)               | 0.70 [0.23-2.13]          | 0.5283            | 0.98 [0.27-3.57]           | 0.9697        |
| <b>Marital Status</b>                                     |                        |                           |                           |                   |                            |               |
| Married (inc. de facto)                                   | 145 (74.36)            | 1,335 (91.38)             | 1.00 [referent]           |                   | 1.00 [referent]            |               |
| All Other                                                 | 50 (25.64)             | 120 (8.21)                | <b>18.44 [5.70-59.63]</b> | <b>&lt;0.0001</b> | <b>5.92 [1.43-24.59]</b>   | <b>0.0144</b> |
| Unavailable                                               | 0 (0.00)               | 6 (0.41)                  |                           |                   |                            |               |
| <b>Occupational Status Scale at Time of Child's Birth</b> |                        |                           |                           |                   |                            |               |
| 0-20                                                      | 70 (35.90)             | 239 (16.36)               | <b>12.68 [4.58-35.09]</b> | <b>&lt;0.0001</b> | <b>3.61 [1.19-10.95]</b>   | <b>0.0235</b> |
| >80-100                                                   | 105 (53.85)            | 1,180 (80.77)             | 1.00 [referent]           |                   | 1.00 [referent]            |               |
| Unavailable                                               | 20 (10.26)             | 42 (2.87)                 |                           |                   |                            |               |
| <b>Pregnancy &amp; Birth</b>                              |                        |                           |                           |                   |                            |               |
| <b>Fertility Treatments</b>                               |                        |                           |                           |                   |                            |               |
| No                                                        | 180 (92.31)            | 1,208 (82.68)             | 1.00 [referent]           |                   | 1.00 [referent]            |               |
| Yes                                                       | 15 (7.69)              | 253 (17.32)               | 0.16 [0.04-0.55]          | 0.0041            | 0.42 [0.09-1.95]           | 0.2644        |
| <b>Smoking Status During Pregnancy</b>                    |                        |                           |                           |                   |                            |               |
| No                                                        | 145 (74.36)            | 1,273 (87.13)             | 1.00 [referent]           |                   | 1.00 [referent]            |               |
| Yes                                                       | 50 (25.64)             | 188 (12.87)               | <b>6.35 [2.24-18.01]</b>  | <b>0.0005</b>     | 0.28 [0.07-1.09]           | 0.0655        |
| <b>Pre-eclampsia</b>                                      |                        |                           |                           |                   |                            |               |
| No                                                        | 176 (90.26)            | 1,284 (87.89)             | 1.00 [referent]           |                   | 1.00 [referent]            |               |
| Yes                                                       | 19 (9.74)              | 177 (12.11)               | 0.61 [0.18-2.10]          | 0.4336            | 1.09 [0.26-4.60]           | 0.9080        |
| <b>Gestational Diabetes</b>                               |                        |                           |                           |                   |                            |               |
| No                                                        | 184 (94.36)            | 1,370 (93.77)             | 1.00 [referent]           |                   | 1.00 [referent]            |               |
| Yes                                                       | 11 (5.64)              | 91 (6.23)                 | 0.84 [0.16-4.44]          | 0.8360            | 0.66 [0.11-4.01]           | 0.6511        |
| <b>Threatened Abortion</b>                                |                        |                           |                           |                   |                            |               |
| No                                                        | 189 (96.92)            | 1,383 (94.66)             | 1.00 [referent]           |                   | 1.00 [referent]            |               |
| Yes                                                       | 6 (3.08)               | 78 (5.34)                 | 0.36 [0.05-2.41]          | 0.2905            | 0.20 [0.01-3.32]           | 0.2578        |
| <b>Other Pregnancy Related Complications</b>              |                        |                           |                           |                   |                            |               |
| No                                                        | 53 (27.18)             | 523 (35.80)               | 1.00 [referent]           |                   | 1.00 [referent]            |               |
| Yes                                                       | 142 (72.82)            | 938 (64.20)               | 1.96 [0.84-4.54]          | 0.1191            | 1.29 [0.45-3.71]           | 0.6348        |
| <b>Threatened Preterm Labour</b>                          |                        |                           |                           |                   |                            |               |
| No                                                        | 162 (83.08)            | 1,302 (89.12)             | 1.00 [referent]           |                   | 1.00 [referent]            |               |
| Yes                                                       | 33 (16.92)             | 159 (10.88)               | 3.21 [0.80-12.92]         | 0.1002            | 1.20 [0.32-4.48]           | 0.7821        |
| <b>APH</b>                                                |                        |                           |                           |                   |                            |               |
| No                                                        | 183 (93.85)            | 1,415 (96.85)             | 1.00 [referent]           |                   | 1.00 [referent]            |               |
| Yes                                                       | 12 (6.15)              | 46 (3.15)                 | 6.80 [0.62-74.13]         | 0.1156            | 4.92 [0.62-39.01]          | 0.1315        |
| <b>Placenta Praevia</b>                                   |                        |                           |                           |                   |                            |               |
| No                                                        | 195 (100.00)           | 1,451 (99.32)             |                           |                   |                            |               |
| Yes                                                       | 0 (0.00)               | 10 (0.68)                 |                           |                   |                            |               |
| <b>Placental Abruption</b>                                |                        |                           |                           |                   |                            |               |
| No                                                        | 195 (100.00)           | 1,455 (99.59)             |                           |                   |                            |               |
| Yes                                                       | 0 (0.00)               | 6 (0.41)                  |                           |                   |                            |               |
| <b>Fetal Distress</b>                                     |                        |                           |                           |                   |                            |               |
| No                                                        | 173 (88.72)            | 1,345 (92.06)             | 1.00 [referent]           |                   | 1.00 [referent]            |               |
| Yes                                                       | 22 (11.28)             | 116 (7.94)                | 2.04 [0.45-9.17]          | 0.3531            | 0.56 [0.11-2.76]           | 0.4753        |
| <b>Cephalopelvic Disproportion<sup>a</sup></b>            |                        |                           |                           |                   |                            |               |
| No                                                        | 195 (100.00)           | 1,457 (99.73)             |                           |                   |                            |               |
| Yes                                                       | 0 (0.00)               | 4 (0.27)                  |                           |                   |                            |               |
| <b>Prolapsed Cord<sup>a</sup></b>                         |                        |                           |                           |                   |                            |               |
| No                                                        | 192 (98.46)            | 1,451 (99.32)             |                           |                   |                            |               |

|                                                            |             |               |                            |                   |                          |               |
|------------------------------------------------------------|-------------|---------------|----------------------------|-------------------|--------------------------|---------------|
| Yes                                                        | 3 (1.54)    | 10 (0.68)     |                            |                   |                          |               |
| <b>Precipitate Delivery<sup>a</sup></b>                    |             |               |                            |                   |                          |               |
| No                                                         | 190 (97.44) | 1,440 (98.56) |                            |                   |                          |               |
| Yes                                                        | 5 (2.56)    | 21 (1.44)     |                            |                   |                          |               |
| <b>PPH ≥500mls</b>                                         |             |               |                            |                   |                          |               |
| No                                                         | 123 (63.08) | 1,076 (73.65) | 1.00 [referent]            |                   | 1.00 [referent]          |               |
| Yes                                                        | 72 (36.92)  | 385 (26.35)   | <b>3.13 [1.22-8.05]</b>    | <b>0.0177</b>     | 1.84 [0.67-5.03]         | 0.2374        |
| <b>TSR ≥2mins</b>                                          |             |               |                            |                   |                          |               |
| No                                                         | 163 (83.59) | 1,261 (86.31) | 1.00 [referent]            |                   | 1.00 [referent]          |               |
| Yes                                                        | 32 (16.41)  | 200 (13.69)   | 0.95 [0.39-2.30]           | 0.9080            | 0.62 [0.20-1.91]         | 0.3991        |
| <b>Apgar 5-minutes &lt;7<sup>a</sup></b>                   |             |               |                            |                   |                          |               |
| No                                                         | 193 (98.97) | 1,430 (97.88) |                            |                   |                          |               |
| Yes                                                        | 2 (1.03)    | 31 (2.12)     |                            |                   |                          |               |
| <b>Intubation</b>                                          |             |               |                            |                   |                          |               |
| No                                                         | 159 (81.54) | 1,230 (84.19) | 1.00 [referent]            |                   | 1.00 [referent]          |               |
| Yes                                                        | 36 (18.46)  | 231 (15.81)   | 1.13 [0.49-2.58]           | 0.7789            | 1.68 [0.59-4.81]         | 0.3326        |
| <b>Early Preterm Birth</b>                                 |             |               |                            |                   |                          |               |
| No                                                         | 155 (79.49) | 1,255 (85.90) | 1.00 [referent]            |                   | 1.00 [referent]          |               |
| Yes                                                        | 40 (20.51)  | 206 (14.10)   | 2.57 [0.75-8.80]           | 0.1333            | 0.79 [0.23-2.80]         | 0.7200        |
| <b>POBW &lt;15<sup>th</sup> Percentile</b>                 |             |               |                            |                   |                          |               |
| No                                                         | 142 (72.82) | 1,089 (74.54) | 1.00 [referent]            |                   | 1.00 [referent]          |               |
| Yes                                                        | 36 (18.46)  | 181 (12.39)   | 1.62 [0.72-3.66]           | 0.2464            | 1.74 [0.71-4.25]         | 0.2224        |
| Unavailable                                                | 17 (8.72)   | 191 (13.07)   |                            |                   |                          |               |
| <b>Parity</b>                                              |             |               |                            |                   |                          |               |
| 0                                                          | 51 (26.15)  | 611 (41.82)   | 1.00 [referent]            |                   | 1.00 [referent]          |               |
| 1                                                          | 81 (41.54)  | 502 (34.36)   | <b>4.67 [1.71-12.70]</b>   | <b>0.0026</b>     | <b>5.12 [1.25-20.99]</b> | <b>0.0232</b> |
| ≥2                                                         | 63 (32.31)  | 348 (23.82)   | <b>6.18 [2.09-18.27]</b>   | <b>0.0010</b>     | 6.37 [1.00-40.66]        | 0.0504        |
| <b>Child</b>                                               |             |               |                            |                   |                          |               |
| <b>Sex</b>                                                 |             |               |                            |                   |                          |               |
| Female                                                     | 85 (43.59)  | 765 (52.36)   | 1.00 [referent]            |                   | 1.00 [referent]          |               |
| Male                                                       | 110 (56.41) | 696 (47.64)   | <b>3.03 [1.60-5.71]</b>    | <b>0.0007</b>     | <b>3.57 [1.66-7.65]</b>  | <b>0.0011</b> |
| <b>Ethnicity</b>                                           |             |               |                            |                   |                          |               |
| Other                                                      | 165 (84.62) | 1,407 (96.30) | 1.00 [referent]            |                   | 1.00 [referent]          |               |
| Indigenous Australian                                      | 30 (15.38)  | 54 (3.70)     | <b>34.27 [7.49-156.82]</b> | <b>&lt;0.0001</b> | 2.22 [0.32-15.52]        | 0.4199        |
| <b>Child Speaks Language Other Than English at Home</b>    |             |               |                            |                   |                          |               |
| No                                                         | 167 (85.64) | 1,349 (92.33) | 1.00 [referent]            |                   | 1.00 [referent]          |               |
| Yes                                                        | 28 (14.36)  | 112 (7.67)    | 3.82 [0.89-16.47]          | 0.0724            | 2.14 [0.49-9.35]         | 0.3127        |
| <b>Age Category at Time of AEDC Completion<sup>b</sup></b> |             |               |                            |                   |                          |               |
| 1                                                          | 48 (24.62)  | 273 (18.69)   | 2.09 [0.74-5.89]           | 0.1641            | 2.18 [0.77-6.16]         | 0.1401        |
| 2                                                          | 128 (65.64) | 1,071 (73.31) | 1.00 [referent]            |                   | 1.00 [referent]          |               |
| 3                                                          | 19 (9.74)   | 117 (8.01)    | 2.56 [0.56-11.82]          | 0.2273            | 1.06 [0.22-5.19]         | 0.9434        |
| <b>Total Number of Siblings</b>                            |             |               |                            |                   |                          |               |
| 1                                                          | 41 (21.03)  | 467 (31.96)   | 1.00 [referent]            |                   | 1.00 [referent]          |               |
| 2                                                          | 79 (40.51)  | 575 (39.36)   | <b>2.82 [1.01-7.88]</b>    | <b>0.0478</b>     | 0.63 [0.15-2.60]         | 0.5215        |
| 3                                                          | 35 (17.95)  | 279 (19.10)   | 2.40 [0.71-8.13]           | 0.1600            | 0.23 [0.04-1.40]         | 0.1104        |
| >3                                                         | 40 (20.51)  | 140 (9.58)    | <b>17.34 [4.37-68.74]</b>  | <b>&lt;0.0001</b> | 2.14 [0.29-15.84]        | 0.4546        |
| <b>Sociodemographic</b>                                    |             |               |                            |                   |                          |               |
| <b>Index of Relative Socioeconomic Disadvantage</b>        |             |               |                            |                   |                          |               |
| Lowest Quintile                                            | 141 (72.31) | 1,232 (84.33) | <b>6.87 [1.80-26.28]</b>   | <b>0.0049</b>     | 1.52 [0.47-4.94]         | 0.4863        |
| > Lowest Quintile                                          | 46 (23.59)  | 191 (13.07)   | 1.00 [referent]            |                   | 1.00 [referent]          |               |
| Unavailable                                                | 8 (4.10)    | 38 (2.60)     |                            |                   |                          |               |

<sup>a</sup> Excluded from multivariable analysis due to small N.

<sup>b</sup> Age categories classified as; ≥3 years 10 months to <5 years and one month, 2) ≥5 years and one month to <5 years and 10 months (reference category), 3) ≥5 years and 10 months to <6 years 10 months.

Table 5. Risk Factors for Developmental Vulnerability on the Communication Skills &amp; General Knowledge Domain.

| Characteristic                                            | DV<br>(N=200)<br>N (%) | NDV<br>(N=1,456)<br>N (%) | Bivariate                 |                   | Multivariable<br>(N=1,352) |               |
|-----------------------------------------------------------|------------------------|---------------------------|---------------------------|-------------------|----------------------------|---------------|
|                                                           |                        |                           | OR [95% CI]               | p-value           | aOR [95% CI]               | p-value       |
| <b>Maternal</b>                                           |                        |                           |                           |                   |                            |               |
| <b>Age at Time of Child's Birth (years)</b>               |                        |                           |                           |                   |                            |               |
| <25                                                       | 59 (29.50)             | 163 (11.20)               | <b>13.25 [3.50-50.17]</b> | <b>0.0002</b>     | <b>10.96 [2.24-53.75]</b>  | <b>0.0032</b> |
| 25-29                                                     | 40 (20.00)             | 344 (23.63)               | 1.00 [referent]           |                   | 1.00 [referent]            |               |
| 30-34                                                     | 59 (29.50)             | 547 (37.57)               | 0.74 [0.24-2.28]          | 0.6016            | 1.17 [0.33-4.09]           | 0.8113        |
| ≥35                                                       | 42 (21.00)             | 402 (27.61)               | 0.75 [0.23-2.47]          | 0.6322            | 1.34 [0.34-5.26]           | 0.6752        |
| <b>Marital Status</b>                                     |                        |                           |                           |                   |                            |               |
| Married (inc. de facto)                                   | 160 (80.00)            | 1,320 (90.66)             | 1.00 [referent]           |                   | 1.00 [referent]            |               |
| All Other                                                 | 40 (20.00)             | 130 (8.93)                | <b>14.40 [2.74-75.72]</b> | <b>0.0017</b>     | 2.28 [0.52-10.04]          | 0.2762        |
| Unavailable                                               | 0 (0.00)               | 6 (0.41)                  |                           |                   |                            |               |
| <b>Occupational Status Scale at Time of Child's Birth</b> |                        |                           |                           |                   |                            |               |
| 0-20                                                      | 68 (34.00)             | 241 (16.55)               | <b>11.20 [3.86-32.50]</b> | <b>&lt;0.0001</b> | 2.11 [0.67-6.65]           | 0.2026        |
| >20-100                                                   | 117 (58.50)            | 1,168 (80.22)             | 1.00 [referent]           |                   | 1.00 [referent]            |               |
| Unavailable                                               | 15 (7.50)              | 47 (3.23)                 |                           |                   |                            |               |
| <b>Pregnancy &amp; Birth</b>                              |                        |                           |                           |                   |                            |               |
| <b>Fertility Treatments</b>                               |                        |                           |                           |                   |                            |               |
| No                                                        | 188 (94.00)            | 1,200 (82.42)             | 1.00 [referent]           |                   | 1.00 [referent]            |               |
| Yes                                                       | 12 (6.00)              | 256 (17.58)               | 0.10 [0.02-0.39]          | 0.0009            | 0.32 [0.06-1.64]           | 0.1721        |
| <b>Smoking Status During Pregnancy</b>                    |                        |                           |                           |                   |                            |               |
| No                                                        | 148 (74.00)            | 1,270 (87.23)             | 1.00 [referent]           |                   | 1.00 [referent]            |               |
| Yes                                                       | 52 (26.00)             | 186 (12.77)               | <b>7.79 [2.61-23.28]</b>  | <b>0.0002</b>     | 1.51 [0.42-5.45]           | 0.5321        |
| <b>Pre-eclampsia</b>                                      |                        |                           |                           |                   |                            |               |
| No                                                        | 175 (87.50)            | 1,285 (88.26)             | 1.00 [referent]           |                   | 1.00 [referent]            |               |
| Yes                                                       | 25 (12.50)             | 171 (11.74)               | 1.07 [0.29-3.90]          | 0.9240            | 0.95 [0.21-4.20]           | 0.9441        |
| <b>Gestational Diabetes</b>                               |                        |                           |                           |                   |                            |               |
| No                                                        | 187 (93.50)            | 1,367 (93.89)             | 1.00 [referent]           |                   | 1.00 [referent]            |               |
| Yes                                                       | 13 (6.50)              | 89 (6.11)                 | 1.16 [0.20-6.72]          | 0.8696            | 1.39 [0.23-8.50]           | 0.7243        |
| <b>Threatened Abortion</b>                                |                        |                           |                           |                   |                            |               |
| No                                                        | 192 (96.00)            | 1,380 (94.78)             | 1.00 [referent]           |                   | 1.00 [referent]            |               |
| Yes                                                       | 8 (4.00)               | 76 (5.22)                 | 0.55 [0.09-3.48]          | 0.5237            | 0.37 [0.02-5.73]           | 0.4767        |
| <b>Other Pregnancy Related Complications</b>              |                        |                           |                           |                   |                            |               |
| No                                                        | 51 (25.50)             | 525 (36.06)               | 1.00 [referent]           |                   | 1.00 [referent]            |               |
| Yes                                                       | 149 (74.50)            | 931 (63.94)               | <b>2.53 [1.07-6.00]</b>   | <b>0.0352</b>     | 1.61 [0.53-4.90]           | 0.4040        |
| <b>Threatened Preterm Labour</b>                          |                        |                           |                           |                   |                            |               |
| No                                                        | 178 (89.00)            | 1,286 (88.32)             | 1.00 [referent]           |                   | 1.00 [referent]            |               |
| Yes                                                       | 22 (11.00)             | 170 (11.68)               | 1.00 [0.27-3.61]          | 0.9937            | 0.45 [0.11-1.88]           | 0.2716        |
| <b>APH</b>                                                |                        |                           |                           |                   |                            |               |
| No                                                        | 188 (94.00)            | 1,410 (96.84)             | 1.00 [referent]           |                   | 1.00 [referent]            |               |
| Yes                                                       | 12 (6.00)              | 46 (3.16)                 | 9.09 [0.70-117.63]        | 0.0910            | 1.15 [0.12-11.44]          | 0.9047        |
| <b>Placenta Praevia<sup>a</sup></b>                       |                        |                           |                           |                   |                            |               |
| No                                                        | 200 (100.00)           | 1,446 (99.31)             |                           |                   |                            |               |
| Yes                                                       | 0 (0.00)               | 10 (0.69)                 |                           |                   |                            |               |
| <b>Placental Abruption<sup>a</sup></b>                    |                        |                           |                           |                   |                            |               |
| No                                                        | 199 (99.50)            | 1,451 (99.66)             |                           |                   |                            |               |
| Yes                                                       | 1 (0.50)               | 5 (0.34)                  |                           |                   |                            |               |
| <b>Fetal Distress</b>                                     |                        |                           |                           |                   |                            |               |
| No                                                        | 172 (86.00)            | 1,346 (92.45)             | 1.00 [referent]           |                   | 1.00 [referent]            |               |
| Yes                                                       | 28 (14.00)             | 110 (7.55)                | 4.73 [1.00-22.38]         | 0.0503            | 2.21 [0.52-9.41]           | 0.2853        |
| <b>Cephalopelvic Disproportion<sup>a</sup></b>            |                        |                           |                           |                   |                            |               |
| No                                                        | 200 (100.00)           | 1,452 (99.73)             |                           |                   |                            |               |
| Yes                                                       | 0 (0.00)               | 4 (0.27)                  |                           |                   |                            |               |
| <b>Prolapsed Cord<sup>a</sup></b>                         |                        |                           |                           |                   |                            |               |
| No                                                        | 200 (100)              | 1,443 (99.11)             |                           |                   |                            |               |

|                                                            |             |               |                            |               |                           |               |
|------------------------------------------------------------|-------------|---------------|----------------------------|---------------|---------------------------|---------------|
| Yes                                                        | 0 (0.00)    | 13 (0.89)     |                            |               |                           |               |
| <b>Precipitate Delivery<sup>a</sup></b>                    |             |               |                            |               |                           |               |
| No                                                         | 195 (97.50) | 1,435 (98.56) |                            |               |                           |               |
| Yes                                                        | 5 (2.50)    | 21 (1.44)     |                            |               |                           |               |
| <b>PPH ≥500mls</b>                                         |             |               |                            |               |                           |               |
| No                                                         | 122 (61.00) | 1,077 (73.97) | 1.00 [referent]            |               | 1.00 [referent]           |               |
| Yes                                                        | 78 (39.00)  | 379 (26.03)   | <b>3.72 [1.41-9.86]</b>    | <b>0.0082</b> | 2.38 [0.84-6.74]          | 0.1040        |
| <b>TSR ≥2mins</b>                                          |             |               |                            |               |                           |               |
| No                                                         | 163 (81.50) | 1,261 (86.61) | 1.00 [referent]            |               | 1.00 [referent]           |               |
| Yes                                                        | 37 (18.50)  | 195 (13.39)   | <b>2.80 [1.08-7.22]</b>    | <b>0.0335</b> | 1.55 [0.50-4.86]          | 0.4481        |
| <b>Apgar 5-minutes &lt;7<sup>a</sup></b>                   |             |               |                            |               |                           |               |
| No                                                         | 198 (99.00) | 1,425 (97.87) |                            |               |                           |               |
| Yes                                                        | 2 (1.00)    | 31 (2.13)     |                            |               |                           |               |
| <b>Intubation</b>                                          |             |               |                            |               |                           |               |
| No                                                         | 162 (81.00) | 1,227 (84.27) | 1.00 [referent]            |               | 1.00 [referent]           |               |
| Yes                                                        | 38 (19.00)  | 229 (15.73)   | 1.91 [0.80-4.56]           | 0.1467        | 1.32 [0.45-3.90]          | 0.6143        |
| <b>Early Preterm Birth</b>                                 |             |               |                            |               |                           |               |
| No                                                         | 157 (78.50) | 1,253 (86.06) | 1.00 [referent]            |               | 1.00 [referent]           |               |
| Yes                                                        | 43 (21.50)  | 203 (13.94)   | 3.73 [0.99-14.09]          | 0.0527        | 1.68 [0.48-5.82]          | 0.4133        |
| <b>POBW &lt;15<sup>th</sup> Percentile</b>                 |             |               |                            |               |                           |               |
| No                                                         | 146 (73.00) | 1,085 (74.52) | 1.00 [referent]            |               | 1.00 [referent]           |               |
| Yes                                                        | 36 (18.00)  | 181 (12.43)   | 1.83 [0.78-4.33]           | 0.1657        | 1.77 [0.72-4.32]          | 0.2113        |
| Unavailable                                                | 18 (9.00)   | 190 (13.05)   |                            |               |                           |               |
| <b>Parity</b>                                              |             |               |                            |               |                           |               |
| 0                                                          | 65 (32.50)  | 597 (41.00)   | 1.00 [referent]            |               | 1.00 [referent]           |               |
| 1                                                          | 68 (34.00)  | 515 (35.37)   | 1.51 [0.59-3.86]           | 0.3845        | 1.56 [0.38-6.42]          | 0.5363        |
| ≥2                                                         | 67 (33.50)  | 344 (23.63)   | <b>4.54 [1.47-14.09]</b>   | <b>0.0088</b> | 2.48 [0.38-15.95]         | 0.3397        |
| <b>Child</b>                                               |             |               |                            |               |                           |               |
| <b>Sex</b>                                                 |             |               |                            |               |                           |               |
| Female                                                     | 87 (43.50)  | 763 (52.40)   | 1.00 [referent]            |               | 1.00 [referent]           |               |
| Male                                                       | 113 (56.50) | 693 (47.60)   | <b>3.00 [1.56-5.79]</b>    | <b>0.0011</b> | <b>3.26 [1.49-7.10]</b>   | <b>0.0030</b> |
| <b>Ethnicity</b>                                           |             |               |                            |               |                           |               |
| Other                                                      | 179 (89.50) | 1,393 (95.67) | 1.00 [referent]            |               | 1.00 [referent]           |               |
| Indigenous Australian                                      | 21 (10.50)  | 63 (4.33)     | <b>21.66 [2.34-200.50]</b> | <b>0.0068</b> | 0.81 [0.10-6.68]          | 0.8416        |
| <b>Child Speaks Language Other Than English at Home</b>    |             |               |                            |               |                           |               |
| No                                                         | 161 (80.50) | 1,355 (93.06) | 1.00 [referent]            |               | 1.00 [referent]           |               |
| Yes                                                        | 39 (19.50)  | 101 (6.94)    | <b>11.16 [3.30-37.77]</b>  | <b>0.0001</b> | <b>17.83 [4.10-77.61]</b> | <b>0.0001</b> |
| <b>Age Category at Time of AEDC Completion<sup>b</sup></b> |             |               |                            |               |                           |               |
| 1                                                          | 57 (28.5)   | 264 (18.13)   | <b>5.60 [1.73-18.09]</b>   | <b>0.0041</b> | <b>6.01 [1.97-18.31]</b>  | <b>0.0016</b> |
| 2                                                          | 125 (62.5)  | 1,074 (73.76) | 1.00 [referent]            |               | 1.00 [referent]           |               |
| 3                                                          | 18 (9)      | 118 (8.1)     | 1.91 [0.44-8.30]           | 0.3869        | 1.30 [0.24-6.95]          | 0.7618        |
| <b>Total Number of Siblings</b>                            |             |               |                            |               |                           |               |
| 1                                                          | 49 (24.50)  | 459 (31.52)   | 1.00 [referent]            |               | 1.00 [referent]           |               |
| 2                                                          | 77 (38.50)  | 577 (39.63)   | 1.54 [0.58-4.13]           | 0.3870        | 0.88 [0.20-3.81]          | 0.8637        |
| 3                                                          | 37 (18.50)  | 277 (19.02)   | 1.64 [0.49-5.44]           | 0.4189        | 1.11 [0.18-6.78]          | 0.9131        |
| >3                                                         | 37 (18.50)  | 143 (9.82)    | <b>15.85 [2.91-86.42]</b>  | <b>0.0014</b> | 4.07 [0.48-34.47]         | 0.1976        |
| <b>Sociodemographic</b>                                    |             |               |                            |               |                           |               |
| <b>Index of Relative Socioeconomic Disadvantage</b>        |             |               |                            |               |                           |               |
| Lowest Quintile                                            | 153 (76.50) | 1,220 (83.79) | <b>4.24 [1.12-16.03]</b>   | <b>0.0332</b> | 0.92 [0.26-3.26]          | 0.8903        |
| > Lowest Quintile                                          | 42 (21.00)  | 195 (13.39)   | 1.00 [referent]            |               | 1.00 [referent]           |               |
| Unavailable                                                | 5 (2.50)    | 41 (2.82)     |                            |               |                           |               |

<sup>a</sup> Excluded from multivariable analysis due to small N.

<sup>b</sup> Age categories classified as; ≥3 years 10 months to <5 years and one month, 2) ≥5 years and one month to <5 years and 10 months (reference category), 3) ≥5 years and 10 months to <6 years 10 months.



**STROBE 2007 (v4) Statement—Checklist of items that should be included in reports of *cohort studies***

| Section/Topic                | Item # | Recommendation                                                                                                                                                                       | Reported on page # |
|------------------------------|--------|--------------------------------------------------------------------------------------------------------------------------------------------------------------------------------------|--------------------|
| <b>Title and abstract</b>    | 1      | (a) Indicate the study's design with a commonly used term in the title or the abstract                                                                                               | 3                  |
|                              |        | (b) Provide in the abstract an informative and balanced summary of what was done and what was found                                                                                  | 3                  |
| <b>Introduction</b>          |        |                                                                                                                                                                                      |                    |
| Background/rationale         | 2      | Explain the scientific background and rationale for the investigation being reported                                                                                                 | 5-6                |
| Objectives                   | 3      | State specific objectives, including any prespecified hypotheses                                                                                                                     | 6                  |
| <b>Methods</b>               |        |                                                                                                                                                                                      |                    |
| Study design                 | 4      | Present key elements of study design early in the paper                                                                                                                              | 3                  |
| Setting                      | 5      | Describe the setting, locations, and relevant dates, including periods of recruitment, exposure, follow-up, and data collection                                                      | 3 and 7            |
| Participants                 | 6      | (a) Give the eligibility criteria, and the sources and methods of selection of participants. Describe methods of follow-up                                                           | 7                  |
|                              |        | (b) For matched studies, give matching criteria and number of exposed and unexposed                                                                                                  | n/a                |
| Variables                    | 7      | Clearly define all outcomes, exposures, predictors, potential confounders, and effect modifiers. Give diagnostic criteria, if applicable                                             | 6-10               |
| Data sources/<br>measurement | 8*     | For each variable of interest, give sources of data and details of methods of assessment (measurement). Describe comparability of assessment methods if there is more than one group | 6-10               |
| Bias                         | 9      | Describe any efforts to address potential sources of bias                                                                                                                            | 6-10               |
| Study size                   | 10     | Explain how the study size was arrived at                                                                                                                                            | 7                  |
| Quantitative variables       | 11     | Explain how quantitative variables were handled in the analyses. If applicable, describe which groupings were chosen and why                                                         | 7-10               |
| Statistical methods          | 12     | (a) Describe all statistical methods, including those used to control for confounding                                                                                                | 10                 |
|                              |        | (b) Describe any methods used to examine subgroups and interactions                                                                                                                  | 10                 |
|                              |        | (c) Explain how missing data were addressed                                                                                                                                          | 10                 |
|                              |        | (d) If applicable, explain how loss to follow-up was addressed                                                                                                                       | 10                 |
|                              |        | (e) Describe any sensitivity analyses                                                                                                                                                | 10                 |
| <b>Results</b>               |        |                                                                                                                                                                                      |                    |

|                          |     |                                                                                                                                                                                                                                                                                                                                                                                                               |                                 |
|--------------------------|-----|---------------------------------------------------------------------------------------------------------------------------------------------------------------------------------------------------------------------------------------------------------------------------------------------------------------------------------------------------------------------------------------------------------------|---------------------------------|
| Participants             | 13* | (a) Report numbers of individuals at each stage of study—eg numbers potentially eligible, examined for eligibility, confirmed eligible, included in the study, completing follow-up, and analysed<br>(b) Give reasons for non-participation at each stage<br>(c) Consider use of a flow diagram                                                                                                               | 7-11<br>N/A<br>N/A              |
| Descriptive data         | 14* | (a) Give characteristics of study participants (eg demographic, clinical, social) and information on exposures and potential confounders<br>(b) Indicate number of participants with missing data for each variable of interest<br>(c) Summarise follow-up time (eg, average and total amount)                                                                                                                | 10-11 and 26-29<br>26-31<br>N/A |
| Outcome data             | 15* | Report numbers of outcome events or summary measures over time                                                                                                                                                                                                                                                                                                                                                | 26-29                           |
| Main results             | 16  | (a) Give unadjusted estimates and, if applicable, confounder-adjusted estimates and their precision (eg, 95% confidence interval). Make clear which confounders were adjusted for and why they were included<br>(b) Report category boundaries when continuous variables were categorized<br>(c) If relevant, consider translating estimates of relative risk into absolute risk for a meaningful time period | 10-11 and 26-29<br>10-11<br>N/A |
| Other analyses           | 17  | Report other analyses done—eg analyses of subgroups and interactions, and sensitivity analyses                                                                                                                                                                                                                                                                                                                | N/A                             |
| <b>Discussion</b>        |     |                                                                                                                                                                                                                                                                                                                                                                                                               |                                 |
| Key results              | 18  | Summarise key results with reference to study objectives                                                                                                                                                                                                                                                                                                                                                      | 11                              |
| <b>Limitations</b>       |     |                                                                                                                                                                                                                                                                                                                                                                                                               |                                 |
| Interpretation           | 20  | Give a cautious overall interpretation of results considering objectives, limitations, multiplicity of analyses, results from similar studies, and other relevant evidence                                                                                                                                                                                                                                    | 4 and 14                        |
| Generalisability         | 21  | Discuss the generalisability (external validity) of the study results                                                                                                                                                                                                                                                                                                                                         | 15                              |
| <b>Other information</b> |     |                                                                                                                                                                                                                                                                                                                                                                                                               |                                 |
| Funding                  | 22  | Give the source of funding and the role of the funders for the present study and, if applicable, for the original study on which the present article is based                                                                                                                                                                                                                                                 | 17                              |

\*Give information separately for cases and controls in case-control studies and, if applicable, for exposed and unexposed groups in cohort and cross-sectional studies.

**Note:** An Explanation and Elaboration article discusses each checklist item and gives methodological background and published examples of transparent reporting. The STROBE checklist is best used in conjunction with this article (freely available on the Web sites of PLoS Medicine at <http://www.plosmedicine.org/>, Annals of Internal Medicine at <http://www.annals.org/>, and Epidemiology at <http://www.epidem.com/>). Information on the STROBE Initiative is available at [www.strobe-statement.org](http://www.strobe-statement.org).



# BMJ Open

## The associations between biological and sociodemographic risks for developmental vulnerability in twins at age five: A population data linkage study in Western Australia.

|                                 |                                                                                                                                                                                                                                                                                                                                                                                         |
|---------------------------------|-----------------------------------------------------------------------------------------------------------------------------------------------------------------------------------------------------------------------------------------------------------------------------------------------------------------------------------------------------------------------------------------|
| Journal:                        | <i>BMJ Open</i>                                                                                                                                                                                                                                                                                                                                                                         |
| Manuscript ID                   | bmjopen-2020-038846.R2                                                                                                                                                                                                                                                                                                                                                                  |
| Article Type:                   | Original research                                                                                                                                                                                                                                                                                                                                                                       |
| Date Submitted by the Author:   | 15-Sep-2020                                                                                                                                                                                                                                                                                                                                                                             |
| Complete List of Authors:       | Dhamrait, Gursimran; Telethon Kids Institute, ; The University of Western Australia Faculty of Health and Medical Sciences, School of Population and Global Health<br>Christensen, Daniel; Telethon Kids Institute<br>Pereira, G.F; Telethon Kids Institute; Curtin University, School of Public Health<br>Taylor, Catherine; Telethon Kids Institute; University of Western Australia, |
| <b>Primary Subject Heading</b>: | Paediatrics                                                                                                                                                                                                                                                                                                                                                                             |
| Secondary Subject Heading:      | Public health, Epidemiology                                                                                                                                                                                                                                                                                                                                                             |
| Keywords:                       | EPIDEMIOLOGY, PAEDIATRICS, PUBLIC HEALTH                                                                                                                                                                                                                                                                                                                                                |
|                                 |                                                                                                                                                                                                                                                                                                                                                                                         |

SCHOLARONE™  
Manuscripts



I, the Submitting Author has the right to grant and does grant on behalf of all authors of the Work (as defined in the below author licence), an exclusive licence and/or a non-exclusive licence for contributions from authors who are: i) UK Crown employees; ii) where BMJ has agreed a CC-BY licence shall apply, and/or iii) in accordance with the terms applicable for US Federal Government officers or employees acting as part of their official duties; on a worldwide, perpetual, irrevocable, royalty-free basis to BMJ Publishing Group Ltd ("BMJ") its licensees and where the relevant Journal is co-owned by BMJ to the co-owners of the Journal, to publish the Work in this journal and any other BMJ products and to exploit all rights, as set out in our [licence](#).

The Submitting Author accepts and understands that any supply made under these terms is made by BMJ to the Submitting Author unless you are acting as an employee on behalf of your employer or a postgraduate student of an affiliated institution which is paying any applicable article publishing charge ("APC") for Open Access articles. Where the Submitting Author wishes to make the Work available on an Open Access basis (and intends to pay the relevant APC), the terms of reuse of such Open Access shall be governed by a Creative Commons licence – details of these licences and which [Creative Commons](#) licence will apply to this Work are set out in our licence referred to above.

Other than as permitted in any relevant BMJ Author's Self Archiving Policies, I confirm this Work has not been accepted for publication elsewhere, is not being considered for publication elsewhere and does not duplicate material already published. I confirm all authors consent to publication of this Work and authorise the granting of this licence.

## **Manuscript**

**Title:** The associations between biological and sociodemographic risks for developmental vulnerability in twins at age five: A population data linkage study in Western Australia.

Gursimran K. Dhamrait,<sup>1,2</sup> Daniel Christensen,<sup>1,3</sup> Gavin Pereira<sup>1,4,5</sup> and Catherine L. Taylor.<sup>1,3</sup>

<sup>1</sup>Telethon Kids Institute, Nedlands, Western Australia, Australia.

<sup>2</sup>School of Population and Global Health, The University of Western Australia, Nedlands, Western Australia, Australia.

<sup>3</sup>Centre for Child Health Research, The University of Western Australia, Nedlands, Western Australia, Australia.

<sup>4</sup>School of Public Health, Curtin University, Perth, Australia.

<sup>5</sup>Centre for Fertility and Health (CeFH), Norwegian Institute of Public Health, Oslo, Norway.

### **Address correspondence to:**

Gursimran K. Dhamrait

Telethon Kids Institute

15 Hospital Avenue, Nedlands, Western Australia, Australia.

Phone: 61+ 8 9489 1183

Fax: 61+ 8 9489 7700

Email: [gursimran.dhamrait@telethonkids.org.au](mailto:gursimran.dhamrait@telethonkids.org.au)

**Main Body Word Count:** 4,287 words

**Abstract Word Count:** 300 words

**Short Title:** Developmental vulnerability in twins at age five

### **Abbreviations**

AEDC: Australian Early Development Census

ARIA: Accessibility and Remoteness Index of Australia

AUSEI06: Australian Socioeconomic Index 2006

DV1: Developmentally Vulnerable on one or more Australian Early Development Census domains

DV2: Developmentally Vulnerable on two or more Australian Early Development Census domains

CI: Confidence Interval

IRSD: Index of Relative Socioeconomic Disadvantage

1 37 MNS: Midwives Notifications System  
2  
3 38 OR: Odds Ratio  
4  
5 39 POBW: Proportion of Optimal Birth Weight  
6  
7 40 WA: Western Australia

8 41  
9

10 42 **Keywords (max of 5):**

11  
12 43 Twins, Australian Early Development Census, Child Development, Record Linkage.  
13  
14  
15  
16  
17  
18  
19  
20  
21  
22  
23  
24  
25  
26  
27  
28  
29  
30  
31  
32  
33  
34  
35  
36  
37  
38  
39  
40  
41  
42  
43  
44  
45  
46  
47  
48  
49  
50  
51  
52  
53  
54  
55  
56  
57  
58  
59  
60

For peer review only

## Abstract

**Objective:** To investigate the prevalence of, and associations between, prenatal and perinatal risk factors and developmental vulnerability in twins at age five.

**Design:** Retrospective cohort study using bivariate and multivariable logistic regression.

**Setting:** Western Australia (WA), 2002-2015.

**Participants:** 828 twin pairs born in WA with an Australian Early Development Census (AEDC) record from 2009, 2012 or 2015.

**Main Outcome Measures:** The AEDC is a national measure of child development across five domains. Children with scores <10<sup>th</sup> percentile were classified as developmentally vulnerable on, one or more domains (DV1), or two or more domains (DV2).

**Results:** In this population, 26.0% twins were classified as DV1 and 14.1% as DV2. In the multivariable model, risk factors for DV1 were; maternal age <25 years (aOR 7.06, 95% CI 2.29-21.76), child speaking a language other than English at home (aOR 6.45, 95% CI 2.17-19.17), male child (aOR 5.08, 95% CI: 2.89-8.92), age younger than the reference category for the study sample ( $\geq 5$  years one month to <5 years 10 months) at time of AEDC completion (aOR 3.34, 95% CI: 1.55-7.22), and having a proportion of optimal birthweight (POBW) <15<sup>th</sup> percentile of the study sample (aOR 2.06, 95% CI 1.07-3.98). Risk factors for DV2 were; male child (aOR 7.87, 95% CI: 3.45-17.97), maternal age <25 years (aOR 5.60, 95% CI: 1.30-24.10), age younger than the reference category (aOR 5.36, 95% CI: 1.94-14.82), child speaking a language other than English at home (aOR 4.65, 95% CI: 1.14-19.03), mother's marital status as not married at the time of twins' birth (aOR 4.59, 95% CI: 1.13-18.55), maternal occupation status in the lowest quintile (aOR 3.30, 95% CI: 1.11-9.81) and a POBW <15<sup>th</sup> percentile (aOR 3.11, 95% CI: 1.26-7.64).

**Conclusion:** Both biological and sociodemographic risk factors are associated with developmental vulnerability in twins at five years of age.

## Article Summary

### Strengths and Limitations

- The study is based on a large population-level sample of 1,656 twins.
- This is the first twin study to assess developmental vulnerabilities in an otherwise healthy sample of Australian twins, at the time of their first year of full-time school.
- Bivariate and multivariable logistic regression analysis with the calculation of adjusted odds ratios was performed to explore the associations between a large range of prenatal and perinatal risk factors.
- Twin pairs for which data was complete were used for the analysis.
- The datasets used in this study did not report on twin zygosity nor on complications of pregnancy that are specific to multiple pregnancies (e.g., twin reversed arterial perfusion, twin-twin transfusion syndrome).

## Introduction

The increased use of assisted reproductive technologies and increasing maternal age at conception have attributed to a significant increase in the number of multifetal pregnancies around the world.<sup>1</sup> Multifetal pregnancies are classified as high-risk pregnancies and compared to singleton pregnancies, are associated with higher rates of pregnancy complications and adverse neonatal and perinatal outcomes.<sup>2-6</sup> The majority of the literature assessing higher-order pregnancies has focused primarily on birth outcomes, including preterm birth,<sup>7</sup> low birthweight,<sup>3</sup> and developmental disabilities such as cerebral palsy.<sup>8</sup> Studies that have assessed the longer-term developmental outcomes of twins have focused on developmental outcomes around the age of two years.<sup>9</sup> Such studies have reported that twins had poorer performance, in comparison to singletons, on a range of domains including; communication, gross and fine motor skills, problem solving, personal-social skills, and language development.<sup>10,11</sup> Furthermore, most studies examining child development outcomes at school starting age have focused on singleton children, from a single family and have compared children across families.<sup>12</sup> There is a paucity of research on the developmental vulnerability of multifetal pregnancies such as twins, around the time that they commence formal education.

Child development outcomes can vary significantly based on numerous factors including the child's personal characteristics, such as personal dispositions and abilities, social constructs, and the environments, both intrauterine and extrauterine, in which they develop.<sup>13-16</sup> Studies that have assessed cognitive and school performance outcomes at the age of five have reported that children who are born preterm,<sup>17-24</sup> with a low birthweight,<sup>25-28</sup> are small for gestational age,<sup>29,30</sup> and male<sup>31-34</sup> are more likely to have poorer developmental outcomes. In comparison to singletons, twins are more likely to be classified as preterm<sup>35</sup> or low birthweight, and have fetal growth restriction.<sup>36</sup> Studies have also reported that twins are more likely to have poorer neurodevelopmental outcomes compared to singletons, even after controlling for gestational age and birthweight.<sup>37</sup> A study reported that twins scored lower than singletons in both the Verbal and Performance IQ domains of the Wechsler Preschool and Primary Scale of Intelligence, at the ages of four and five years.<sup>38</sup> Likewise, twin studies have also reported sex differences, with girls scoring higher than boys at ages four and five

1 107 years.<sup>38</sup> The cumulative nature of school-based learning means that developmental gaps at school  
2  
3  
4 108 entry, are difficult to close over time.<sup>39</sup> Children who begin school with poor school readiness often  
5  
6 109 struggle to catch up with their peers and tend to fall further behind as they progress through the  
7  
8 110 subsequent years of schooling.<sup>39</sup> As educational achievement trajectories are largely established by 7  
9  
10  
11 111 years of age (year 3) children with poor school readiness are more likely to have lower later-life  
12  
13 112 educational achievement.<sup>40</sup> Given the higher rates of pregnancy, neonatal and perinatal adversities  
14  
15 113 observed in twins in comparison to singletons, twins are particularly at risk for developmental delays  
16  
17 114 in the early childhood period.  
18  
19  
20 115 Twin studies, assessing the contribution of genes and the environment, have supported the hypothesis  
21  
22 116 that both factors impact child development.<sup>41-44</sup> Yet, a number of studies have reported no significant  
23  
24 117 differences in child development outcomes based on zygosity.<sup>38,45,46</sup> Sociodemographic factors such  
25  
26  
27 118 as low socioeconomic status and low levels of parental education have also been identified to  
28  
29 119 adversely impact child development outcomes.<sup>47-49</sup> A study conducted in younger twins (assessed at  
30  
31 120 age 6, 12, and 18 months) reported that biological factors including low birthweight were associated  
32  
33  
34 121 with poorer early cognitive and non-cognitive development, independently of environmental factors,  
35  
36 122 such as socioeconomic status.<sup>3</sup> Alternatively, a study reported that the environmental factors shared by  
37  
38 123 twins of the same family were more significantly associated with early language skills and school  
39  
40  
41 124 readiness in twins at the age of five years, in comparison to genetic factors.<sup>45</sup> Overall, studies  
42  
43 125 assessing both biological and sociodemographic factors, and their impact on the longer-term child  
44  
45 126 development of children born from multiple pregnancies, remain sparse and the results of the existing  
46  
47 127 studies are mixed.  
48  
49  
50 128 The aim of this study was to examine the prevalence of, and the association between, biological and  
51  
52 129 sociodemographic risk factors and developmental vulnerability in twins in their first year of full-time  
53  
54 130 school.

## 56 131 **Methods**

### 58 132 **Data Sources and Study Population**

#### 60 133 **Data Sources**



1 134 This study used anonymised individual-level data from the Midwives Notification System (MNS),  
2  
3  
4 135 which is a statutory record of all births (still- or live-born) in WA with either a birthweight >400  
5  
6 136 grams and/or a final gestational length of  $\geq 20$  weeks. Variables from MNS were cross validated with  
7  
8 137 corresponding records from WA Birth Registrations. Australian Early Development Census (AEDC)  
9  
10  
11 138 records were obtained for all available years (2009, 2012, and 2015) for all children with WA birth  
12  
13 139 and perinatal records. Across the 2009, 2012, and 2015 AEDC data collections child participation for  
14  
15 140 the State of WA ranged between 98.7-99.6%.<sup>50</sup> WA Register for Developmental Anomalies  
16  
17 141 (WARDA) records were used to identify children who had a diagnosed developmental disability  
18  
19  
20 142 between birth and age five years. Statistical linkage of all records, by matching identifiers (e.g. name,  
21  
22 143 address, date of birth, etc.) common to sets of records,<sup>51</sup> was provided by the WA Data Linkage  
23  
24 144 Branch from the Department of Health WA.

### 26 27 145 **Patient and Public Involvement**

28  
29 146 No patients were involved in the development of the research question or the outcome measures, or in  
30  
31 147 the development of the plans for the design or implementation of the study.  
32

### 33 34 148 **Study Population**

35  
36 149 The study population included all children born in WA with an AEDC record in either 2009, 2012 or  
37  
38 150 2015 (N=73,903). Children were excluded from the study if; 1) they were not from a twin birth  
39  
40 151 (N=71,748), 2) they were identified by their teacher as having 'special-needs' based on a diagnosed  
41  
42  
43 152 physical and/or intellectual disability (N=123), 3) they were reported as having any birth defect in the  
44  
45 153 WARDA datasets (N=119), 4) they had an AEDC score that was either incomplete or missing  
46  
47 154 (N=22), or 5) their twin sibling was excluded based on the aforementioned exclusion criteria (N=235;  
48  
49  
50 155 Figure 1). The final study sample consisted of N=1,656 children; N=828 twin pairs. There were 252  
51  
52 156 opposite sex twin pairs and 576 same sex twin pairs (277 male and 299 female twin pairs).  
53

### 54 55 157 **Outcome Measure**

56  
57 158 The AEDC is a national census of early childhood development spanning five developmental  
58  
59 159 domains; 1) Physical Health and Wellbeing, 2) Social Competence, 3) Emotional Maturity, 4)  
60  
160 Language and Cognitive Skills (school-based), and 5) Communication Skills and General Knowledge.

1 161 The AEDC is conducted every three years, with the first national data collection conducted in 2009.  
2  
3  
4 162 Children with scores <10<sup>th</sup> percentile in a given domain are classified as ‘developmentally vulnerable’  
5  
6 163 (DV). For this study children who scored >10<sup>th</sup> percentile for a given domain were classified as ‘not  
7  
8 164 developmentally vulnerable’ (NDV). AEDC cut-off scores are based on the first national AEDC data  
9  
10  
11 165 collection in 2009 and apply to all AEDC data collections. Domain scores for children with special  
12  
13 166 needs are not included in the AEDC results. In this study, two summarised outcome measures were  
14  
15 167 used; developmentally vulnerable on one or more AEDC domains (DV1) and developmentally  
16  
17 168 vulnerable on two or more AEDC domains (DV2).

## 19 20 169 **Risk Variables**

### 21 22 170 **Maternal Variables**

23  
24 171 Maternal age and marital status at twins’ birth were obtained from the MNS and Birth Registrations.  
25  
26  
27 172 Maternal occupation at birth was obtained from Birth Registrations data and converted to a four-digit  
28  
29 173 standard code using the Australian and New Zealand Standard Classification of Occupations. These  
30  
31 174 codes were then assigned a value ranging from 0-100 using the Australian Socioeconomic Index 2006  
32  
33 175 (AUSEI06).<sup>52</sup> Low AUSEI06 values are representative of low-status occupations and high values  
34  
35  
36 176 represent high-status occupations. This variable was collapsed into two categories; the most  
37  
38 177 disadvantaged quintile (i.e. AUSEI06 [0-20]) and greater than the most disadvantaged quintile (i.e.  
39  
40 178 AUSEI06 >20). An AUSEI06 value of zero was assigned to records if maternal occupation was  
41  
42  
43 179 reported as ‘unemployed,’ ‘stay at home parent,’ or ‘pensioner.’ For records where maternal  
44  
45 180 occupation was not stated, an AUSEI06 value was not assigned and these cases were reported as  
46  
47 181 missing.

### 49 50 182 **Pregnancy and Birth Variables**

51  
52 183 We included several binary pregnancy and birth variables to indicate either the presence or absence;  
53  
54 184 of fertility treatments, smoking during pregnancy, pre-eclampsia, gestational diabetes, threatened  
55  
56 185 abortion, threatened preterm labour, antepartum haemorrhage (APH), placenta praevia, placental  
57  
58  
59 186 abruption, fetal distress, cephalopelvic disproportion, prolapsed cord, precipitate delivery, post-partum  
60  
187 haemorrhage (PPH), intubation status, early preterm birth (<34 weeks of gestational age), and time to

1 188 Spontaneous Respiration (TSR); with a TSR of  $\geq 2$  minutes forming the 'at risk' group, and five-  
2  
3  
4 189 minute Apgar score; with a five-minute Apgar score of  $< 7$  forming the 'at risk' group.

5  
6 190 The proportion of optimal birthweight (POBW) is a measure of fetal growth and is defined as  
7  
8 191 birthweight divided by expected birthweight in the absence of pathologic risk factors. This measure  
9  
10  
11 192 also accounts for non-pathologic determinants of growth, including gestational age, birth order, sex of  
12  
13 193 the child, and maternal height,<sup>53</sup> and has been validated against ultrasound measurements.<sup>54</sup> We  
14  
15 194 derived a binary proxy for fetal growth restriction as POBW  $< 15^{\text{th}}$  percentile, which corresponded to  
16  
17 195 an observed birthweight less than 75.75% of that expected.<sup>9</sup>

18  
19  
20 196 We derived a general category for other pregnancy-related complications (not elsewhere stated; such  
21  
22 197 as urinary tract infection, pre-labour rupture of membranes) for all records. As records may have  
23  
24 198 multiple pregnancy-related complications, all records that had a complication that was not elsewhere  
25  
26  
27 199 stated in this study or had multiple complications of which at least one complication was not  
28  
29 200 elsewhere stated in this study, formed the 'at risk' group for this variable.

### 30 31 201 **Child Variables**

32  
33  
34 202 Sex and ethnicity of the child were obtained from the MNS and Birth Registrations. Age at the time of  
35  
36 203 AEDC completion and language other than English spoken at home by the child were obtained from  
37  
38 204 the AEDC. Age of children at the time of AEDC completion ranged between;  $\geq 3$  years 10 months to  
39  
40 205  $< 6$  years 10 months, with a mean of age category of,  $\geq 5$  years one month to 5 years 10 months. To  
41  
42  
43 206 balance frequencies, the age of children at the time of AEDC completion was categorised into three  
44  
45 207 groups; 1)  $\geq 3$  years 10 months to  $< 5$  years and one month, 2)  $\geq 5$  years one month to  $< 5$  years 10  
46  
47  
48 208 months (reference category) and 3)  $\geq 5$  years 10 months to  $< 6$  years 10 months.

49  
50 209 The total number of siblings was derived as the number of live births to each mother prior to the year  
51  
52 210 that the cohort child had the AEDC conducted. Siblings who died within the neonatal period (i.e.  
53  
54  
55 211 mode of separation post-birth from the hospital was death) were excluded in the calculations for the  
56  
57 212 total number of siblings.

### 58 59 213 **Sociodemographic Variables**

1 214 The Index of Relative Socioeconomic Disadvantage (IRSD)<sup>19</sup> was calculated using the residential  
2  
3  
4 215 address at the time of birth. ISRD is derived from Australian Census data and reflects area-level  
5  
6 216 disadvantage through variables such as low household income, low educational attainment, and high  
7  
8 217 levels of unemployment. This variable was collapsed into two groups; most disadvantaged quintile  
9  
10  
11 218 (i.e. ISRD quintile 1) and greater than the most disadvantaged quintile (i.e. ISRD quintiles 2-5).

## 12 13 219 **Statistical Modelling**

14  
15 220 For each risk variable, the 'least risk' category (e.g. not early preterm birth) was used as the reference  
16  
17 221 category (Table 1). To estimate the risk of a child being classified as DV1 and DV2, a generalised  
18  
19  
20 222 linear mixed model with a logit link function was used with a random intercept for each twin pair. A  
21  
22 223 total of 30 maternal, pregnancy, birth, child, and sociodemographic risk variables were considered for  
23  
24 224 the multivariable models. For DV1, DV2, and each of the five AEDC domains, 24 risk variables were  
25  
26 225 included in the multivariable models; six risk variables were excluded from multivariable analysis due  
27  
28 226 to the prevalence being too small (total N<50 for a given category of a given variable). The variables  
29  
30  
31 227 excluded were; 1) placenta praevia, 2) placental abruption, 3) cephalopelvic disproportion, 4)  
32  
33 228 prolapsed cord, 5) precipitate delivery and 6) a five-minute Apgar score of <7. All variables were  
34  
35  
36 229 added simultaneously to the models. Odds ratios (OR) and the associated 95% confidence intervals  
37  
38 230 (CIs) were estimated for both unadjusted and adjusted models. All analyses were undertaken using  
39  
40 231 PROC GLIMMIX in SAS version 9.4 for Windows.<sup>55</sup>

## 41 42 43 232 **Results**

### 44 45 233 **Prevalence of developmental vulnerability in twins**

46  
47 234 A total of 431 (26.0%) twins were classified as DV1 (Table 1). A total of 151 (18.2%) twin pairs had  
48  
49  
50 235 one twin identified as DV1 and 140 (16.9%) twin pairs had both twins were identified as DV1. Of the  
51  
52 236 24 maternal, pregnancy and birth, child, and sociodemographic risk variables considered in the  
53  
54 237 multivariable models, five variables had a statistically significant association with an increased risk of  
55  
56 238 a twin being classified as DV1. In order of decreasing magnitude of associated risk, the ORs were;  
57  
58  
59 239 maternal age of <25 younger at time of twins' birth (aOR 7.06, 95% CI 2.29 to 21.76), child speaks a  
60  
240 language other than English at home (aOR 6.45, 95% CI 2.17 to 19.17), male twins (aOR 5.08, 95%

CI 2.89 to 8.92), child's age younger than the reference category for the study sample ( $\geq 5$  years one month to 5 years 7 months) at the time of AEDC completion (aOR 3.34, 95% CI: 1.55 to 7.22), and POBW  $< 15^{\text{th}}$  percentile (aOR 2.06, 95% CI 1.07 to 3.98). There was a statistically significant association between an increased risk of a twin being classified as DV1 and maternal age at the time of twins' birth ( $p=0.003$ ), age category at time of ADEC completion ( $p=0.006$ ), and the total number of sibling ( $p=0.0248$ ).

A total of 223 (14.1%) twins were classified as DV2 (Table 2). In 95 (11.5%) twin pairs, one twin was identified as DV2 and in 64 twin pairs (7.9%), both twins were identified as DV2. Of the 24 maternal, pregnancy and birth, child, and sociodemographic risk variables considered in the adjusted models, seven variables had a statistically significant association with an increased risk of a twin being classified as DV2. Risk factors for DV2 were, in order of decreasing magnitude; male twins (aOR 7.87, 95% CI: 3.45 to 17.97), maternal age of  $< 25$  younger at time of twins' birth (aOR 5.60, 95% CI: 1.30 to 24.10), child's age younger than the reference category at time of AEDC completion (aOR 5.36, 95% CI: 1.94 to 14.82), child speaking a language other than English at home (aOR 4.65, 95% CI: 1.14 to 19.03), mother's marital status as not married at the time of twins' birth (aOR 4.59, 95% CI: 1.13 to 18.55), maternal occupation status in the lowest quintile (aOR 3.30, 95% CI: 1.11 to 9.81) and POBW  $< 15^{\text{th}}$  percentile (aOR 3.11, 95% CI: 1.26 to 7.64). There was a statistically significant association between an increased risk of a twin being classified as DV2 and the age category at the time of ADEC completion ( $p=0.001$ ).

#### **Associations with domain-specific developmental vulnerability**

A total of, 188 (11.4%) children were classified as developmentally vulnerable (DV) for the domains of; Physical Health and Wellbeing, 151 (9.1%) for Social Competence, 147 (8.9%) for Emotional Maturity, 195 (11.8%) for Language and Cognitive Skills (school-based), and 200 (12.0%) for Communication Skills and General Knowledge (Supplementary Tables 1-5, respectively). These results were broadly consistent with the findings for the aggregate measures of developmental vulnerability (DV1 and DV2). All variables that were statistically significant in the aggregated measures of developmental vulnerability were statistically significant for the domains.

## Discussion

This study examined the associations between biological and sociodemographic risk factors and developmental vulnerability in twins in their first year of full-time school. To our knowledge, our study is the first of this scale (population-level sample of twins;  $N > 1,600$ ) to report on the prevalence of developmental vulnerabilities, in an otherwise healthy sample of twins, at the time of their first year of full-time school. As studies have reported that twins are more likely to have poorer performance, in comparison to singletons, at the age of two<sup>10,11</sup> it was pertinent to assess if the prevalence rates of developmental vulnerabilities are higher in twins at age five. We reported that in the WA population, 26.0% of twins were classified as DV1 and 14.1% as DV2 across the 2009, 2012, and 2015 AEDC cycles. In the general WA population, which includes twins and higher-order multiples, 23.0% of children were classified as DV1 and 11.3% of children were classified as DV2, across these AEDC cycles.<sup>50</sup> A large cohort study of 99,530 singleton children from New South Wales reported that 20.8% were classified as DV1 across the 2009 and 2012 AEDC cycles.<sup>56</sup> Thus, we found that twins are at an elevated risk of developmental vulnerability relative to a general population of children in the state of Western Australia and in a singleton population in New South Wales. This is consistent with findings from a study of 142 twin pairs from the Louisville Twin Study, that reported twins scored lower than singletons in both the Verbal and Performance IQ domains of the Wechsler Preschool and Primary Scale of Intelligence at both four and five years of age.<sup>38</sup> As our results were obtained from a sample of twins without any diagnosed developmental disabilities, the higher prevalence rates of twins being classified as DV1 and DV2 observed in our study, when compared to the general Australian population, suggests that healthy twins are more likely to be classified as developmentally vulnerable on AEDC domains at school starting age when compared to their singleton counterparts.

The biological factors associated with developmental vulnerability in twins were; male sex, fetal growth restriction, and younger chronological age at the time of AEDC completion. These results are in line with singleton studies<sup>31,57</sup> which have reported that male children are more likely to be classified as developmentally vulnerable in their first year of full-time school, in comparison to female



1 295 children. A study conducted in South Australia of 13,827 children, of which 3.4% were twins, also  
2  
3 296 reported that male twins were more likely to be classified as DV2 when compared to female twins,  
4  
5  
6 297 however, this finding was not statistically significant.<sup>58</sup> The Louisville Twin Study also reported sex  
7  
8 298 differences, with females scoring higher on Full Scale, Verbal, and Performance IQ, than males at  
9  
10 299 ages four and five years, however, scores tended to converge at six years of age.<sup>38</sup>  
11  
12  
13 300 We also reported that twins younger than the reference category for this sample were more likely to be  
14  
15 301 classified as developmentally vulnerable in their first year of full-time school. A study of 840  
16  
17 302 Canadian five-year-old twins, aiming to assess the genetic and environmental factors influencing  
18  
19 303 school readiness, reported that in the preliminary models age was positively correlated with the spatial  
20  
21  
22 304 recognition, numbers, and letters components of the Lollipop test.<sup>59</sup> Furthermore, a recent discussion  
23  
24 305 paper identified the need for further research to assess the effects of delaying school entry for twins<sup>60</sup>  
25  
26 306 thus, highlighting that further research is required to better understand if delaying school entry is  
27  
28  
29 307 beneficial for both short-term and long-term academic outcomes in twins.  
30  
31 308 The sociodemographic risk factors associated with developmental vulnerability in twins included;  
32  
33 309 maternal age, maternal occupational status, and a not married maternal marital status, at the time of  
34  
35  
36 310 twins' birth, and the child speaking a language other than English at home. These results are  
37  
38 311 supported by the South Australian study, which examined a range of variables also included in our  
39  
40 312 study.<sup>58</sup> This study reported that maternal age, marital status, and maternal occupation were associated  
41  
42  
43 313 with an increased risk of children being classified as DV2 on the AEDC.<sup>58</sup> The South Australian study  
44  
45 314 also reported that parity and smoking during pregnancy were also associated with an increased risk of  
46  
47 315 children being classified as DV2.<sup>58</sup> In our study, we observed an increased but statistically  
48  
49 316 insignificant association between these risk variables and twins being classified as either DV1 or  
50  
51  
52 317 DV2.  
53  
54 318 An interesting finding from our study was that speaking a language other than English at home was  
55  
56 319 associated with an increased risk for twins being classified as DV1 and DV2. Previous studies have  
57  
58  
59 320 reported that approximately a fifth of Australian children are bilingual,<sup>61</sup> and the prevalence of twins  
60  
321 speaking a language other than English at home in our study were in line with these results. Results

1 322 from an Australia-wide study of 261,147 children (including singletons and multiples) from the 2009  
2  
3 323 AEDC cycle, reported that bilingual children proficient in English have an equal or slightly lower  
4  
5  
6 324 odds of being classed as DV1 when compared to their English-speaking background peers.<sup>61</sup>  
7  
8 325 However, unlike our study, this study<sup>61</sup> did not report differences in developmental vulnerability  
9  
10 326 based on plurality. Additionally, a Canadian study examining the school readiness profiles of 95,537  
11  
12 327 children in British Columbia<sup>62</sup> reported that bilingualism was associated with positive social,  
13  
14  
15 328 emotional, and cognitive development, as measured by the Early Development Index.<sup>34</sup> Differences in  
16  
17 329 results may be attributed to the fact bilingualism may be a risk factor for twins, however, it may not be  
18  
19  
20 330 a significant risk factor in a general population sample. The language groups most commonly spoken  
21  
22 331 in WA after English (Mandarin, Italian and Vietnamese)<sup>63</sup> are different to those most prevalent in  
23  
24 332 British Colombia (Punjabi, Chinese and German).<sup>64</sup> Thus, the difference in findings between the  
25  
26 333 Canadian study and our results may be attributable to this fact.  
27  
28  
29 334 Our findings have some accord with a cohort study examining the associations between biological and  
30  
31 335 sociodemographic risk factors on late language emergence in 473 twins pairs at the age of two years.<sup>9</sup>  
32  
33 336 Taylor et al. reported that the risk factors for late language emergence in twins, without developmental  
34  
35 337 disabilities, include fetal growth restriction.<sup>9</sup> Interestingly, our study also identified fetal growth  
36  
37 338 restriction as a risk factor for developmental vulnerability at age five, suggesting that the biological  
38  
39 339 implications of a suboptimal intrauterine environment may persist beyond infancy and into early  
40  
41 340 childhood in twins not diagnosed developmental disabilities. In contrast to our study, the Taylor et al.  
42  
43 341 twin sample excluded twins with exposure to languages other than English. This study reported that  
44  
45 342 sociodemographic risk factors (low maternal education, socioeconomic area disadvantage) were not  
46  
47 343 associated with late language emergence at age two years. Our results suggest that sociodemographic  
48  
49 344 factors including, maternal; age, marital status and occupational status, at time of twins' birth, and the  
50  
51 345 child speaking a language other than English at home are associated with an increased risk of  
52  
53 346 developmental vulnerability at age five.<sup>9</sup> The differences in findings between this study and our study  
54  
55 347 suggest that sociodemographic characteristics may play a more significant role as risk variables at age  
56  
57 348 five years compared to at the age of two years. This hypothesis is supported by a subsequent study of



twins aged four and six years, which reported that higher maternal education and older maternal age showed positive effects on language and non-verbal phenotypes.<sup>6</sup> Furthermore, a study of a twin sample from the Quebec Newborn Twin Study reported that environmental factors, such as socioeconomic status, rather than genetic factors were attributable to the predictive association observed between early language skills and school readiness, as measured by the Lollipop Test, in twins 63-months of age.<sup>45</sup> In our study, the zygosity of twins could not be established as WA administrative data does not contain information on zygosity. Furthermore, we did not aim to assess the impact of within twin-pair discordance in regards to developmental vulnerabilities at age five. Thus, further research is required to better elucidate the impact and interplay of biological and sociodemographic risk variables at different stages of development in twins.

Studies assessing twin-singleton differences often control for or select for factors such as prematurity, low birthweight, or parental socioeconomic status.<sup>57,65,66</sup> Our study, however, draws attention to the adverse effects of other risk factors, including POBW and maternal marital status, on child development outcomes at age five. An Australian cohort study of 1,922 children from the Northern Territory using linked administrative data, reported an increased, but non-statistically significant, risk of twins being classified as DV1 on the AEDC, after controlling for a range of biological and sociodemographic variables used in our study including; sex, 5-minute Apgar score <7, area remoteness, ethnicity, child speaks a language other than English at home and maternal age at the time of the child's birth.<sup>57</sup> Although this study gave consideration to plurality as a risk factor for developmental vulnerability, it did not aim to assess the association between a comprehensive set of biological and sociodemographic risk factors. A Canadian study of 5-year old twins reported that shared environmental factors substantially accounted for cognitive school readiness (as measured by the Lollipop Test) as compared to genetic effects.<sup>59</sup> Likewise, other studies have also reported that a range of family factors, which would be assumed to be shared by both twins, such as family income, maternal occupation, and employment status are associated with cognitive school readiness.<sup>67,68</sup>

Further studies in this area are required, as the extent and nature of the risk factors associated with developmental vulnerability at age five in twins remain not well-established.

1 376 Preventative intervention studies have reported that programs designed to improve school readiness  
2  
3  
4 377 and high-quality early childhood education and care, are effective for at-risk populations and can have  
5  
6 378 significant long-term results.<sup>69,70</sup> The higher prevalence rates of DV1 and DV2 in twins observed in  
7  
8 379 this study are indicative of the fact that twins form an at-risk group in terms of developmental  
9  
10 380 vulnerability at the time at which children commence full-time school. Therefore, it is pertinent for  
11  
12  
13 381 those working in the early childhood education sector and for parents to be aware of the  
14  
15 382 developmental vulnerabilities present in twins at the age at which children begin full-time school. In  
16  
17 383 Australia, there has been a call to provide increased quantity and quality of support service and  
18  
19  
20 384 resources for twins and their families due to increased vulnerability,<sup>60</sup> and the results of our study  
21  
22 385 highlight this need.  
23

## 24 386 **Conclusions**

25  
26 387 Both biological and sociodemographic risk factors are associated with developmental vulnerability at  
27  
28  
29 388 the age of five in twins. The findings of our study suggest that twins are more likely to be classified as  
30  
31 389 developmentally vulnerable at school starting age when compared to their singleton counterparts. In  
32  
33 390 particular, the results draw attention to the hypothesis that prenatal, and more significantly perinatal,  
34  
35  
36 391 risk factors and the sociodemographic environments in which twins are raised can impact  
37  
38 392 developmental vulnerability in early childhood.  
39  
40  
41  
42  
43  
44  
45  
46  
47  
48  
49  
50  
51  
52  
53  
54  
55  
56  
57  
58  
59  
60

**Acknowledgements:**

We gratefully acknowledge the WA Data Linkage Branch and the data custodians who provided data for this study and the people of Western Australia for the use of their administrative data. This study does not necessarily reflect their views. This study uses data from the Australian Early Development Census (AEDC). The AEDC is funded by the Australian Government Department of Education and Training. The findings and views reported are those of the authors and should not be attributed to the Department or the Australian Government.

**Ethics Approval:**

Ethics approval for this study was granted by the Western Australian Department of Health Human Research Ethics Committee (2016/51) and the University of Western Australia Human Research Ethics Committee (RA/4/20/4776).

**Declaration of interests:**

The authors declare that they have no competing interests, no financial relationships with any organisations that might have an interest in the submitted work in the previous three years; no other relationships or activities that could appear to have influenced the submitted work.

**Funding:**

This study was supported by National Health and Medical Research Grants (GNT1173991 and GNT1099655 to GP), the Research Council of Norway through its Centres of Excellence funding scheme (#262700 to GP) and the Australian Research Council Centre of Excellence for Children and Families over the Life Course (CE140100027 to CLT and DC). GKD was supported by the ARC Centre of Excellence for Children and Families over the Life Course Scholarship, the ARC Centre of Excellence for Children and Families over the Life Course Top-Up Scholarship and the Stan and Jean Perron Top-Up Scholarship.

**Author Contributions:**

GKD: led study conceptualisation and design, conducted the literature review, performed data manipulation, analysis and interpretation of findings, drafted the initial manuscript and reviewed and revised the manuscript critically for important intellectual content.

1 420 DC, GP and CLT: contributed to the study inception, the development of the design, interpretation of  
2  
3  
4 421 the results, manuscript revisions, the interpretation of the results and revised the manuscript critically  
5  
6 422 for important intellectual content.

7  
8 423 GKD, DC, GP and CLT: approved the final manuscript as submitted and agree to be accountable for  
9  
10 424 all aspects of the work.

11  
12  
13 425 **Data Sharing:**

14  
15 426 The linked administrative data are owned by the government departments who approved the linkage  
16  
17 427 and use of the data for this study. Use of the study data is restricted to named researchers. The current  
18  
19 428 Human Research Ethics Committee approvals were obtained for public sharing and presentation of data  
20  
21  
22 429 on group level only, meaning the data used in this study cannot be shared by the authors. Collaborative  
23  
24 430 research may be conducted according to the ethical requirements and relevant privacy legislations.  
25  
26 431 Potential collaborators should contact author GP with their expression of interest. The steps involved in  
27  
28  
29 432 seeking permission for linkage and use of the data used in this study are the same for all researchers.  
30  
31  
32  
33  
34  
35  
36  
37  
38  
39  
40  
41  
42  
43  
44  
45  
46  
47  
48  
49  
50  
51  
52  
53  
54  
55  
56  
57  
58  
59  
60

## References

1. Umstad MP, Gronow MJ. Multiple pregnancy: a modern epidemic? *Medical journal of Australia*. 2003;178(12):613-615.
2. Marlow N, Roberts BL, Cooke RW. Motor skills in extremely low birthweight children at the age of 6 years. *Arch Dis Child*. 1989 Jun;64(6):839-47.
3. Riese M. Risk and early development: Findings from the Louisville Twin Study. In: Blickstein I, Keith LG, editors. *Multiple Pregnancy: Epidemiology, Gestation, and Perinatal Outcome*. 2 ed: CRC Press; 2005.
4. Australian Bureau of Statistics. *Births* Canberra; 2015. Available from: <http://www.abs.gov.au/AUSSTATS/abs@.nsf/Previousproducts/3301.0Main%20Features32015?open=document&tabname=Summary&prodno=3301.0&issue=2015&num=&view=>
5. Australian Institute of Health and Welfare. *Perinatal deaths in Australia 2013–2014*. Canberra; 2018.
6. Rice ML, Zubrick SR, Taylor CL, Hoffman L, Gayán J. Longitudinal Study of Language and Speech of Twins at 4 and 6 Years: Twinning Effects Decrease, Zygosity Effects Disappear, and Heritability Increases. *J. Speech Lang. Hear. Res*. 2018;61(1):79-93.
7. Fuchs F, Senat MV. Multiple gestations and preterm birth. *Seminars in fetal & neonatal medicine*. 2016;21(2):113-120.
8. Yokoyama Y, Shimizu T, Hayakawa K. Prevalence of cerebral palsy in twins, triplets and quadruplets. *International journal of epidemiology*. 1995;24(5):943-948. Available from: PubMed
9. Taylor CL, Rice ML, Christensen D, Blair E, Zubrick SR. Prenatal and perinatal risks for late language emergence in a population-level sample of twins at age 2. *BMC Pediatr*. 2018 Feb 7;18(1):41.
10. Taylor C, Zubrick S, Christensen D. Multiple risk exposures for reading achievement in childhood and adolescence. *Journal of Epidemiology and Community Health*. 2019;jech-2018-211323.
11. Nan C, Piek J, Warner C, Mellers D, Krone RE, Barrett T, et al. Trajectories and predictors of developmental skills in healthy twins up to 24 months of age. *Infant Behav Dev*. 2013 Dec;36(4):670-8.
12. DiLalla LF. Social Development of Twins. *Twin Research and Human Genetics*. 2006;9(1):95-102.

- 1 460 13. U. Bronfenbrenner. Making Human Beings Human: Bioecological Perspectives on Human  
2  
3 461 Development. Thousand Oaks, California Sage Publications, Inc.; 2005.  
4
- 5  
6 462 14. Fox SE, Levitt P, Nelson CA, 3rd. How the timing and quality of early experiences influence the  
7  
8 463 development of brain architecture. *Child Dev.* 2010 Jan-Feb;81(1):28-40.  
9
- 10 464 15. Barker DJ. The developmental origins of adult disease. *J Am Coll Nutr.* 2004 Dec;23(6  
11  
12 465 Suppl):588s-595s.  
13
- 14  
15 466 16. Bradley RH, Corwyn RF. Socioeconomic status and child development. *Annu Rev Psychol.*  
16  
17 467 2002;53:371-99.  
18
- 19 468 17. Howard K, Roberts G, Lim J, Lee KJ, Barre N, Treyvaud K, et al. Biological and environmental  
20  
21 469 factors as predictors of language skills in very preterm children at 5 years of age. *J Dev Behav Pediatr.*  
22  
23 470 2011 Apr;32(3):239-49.  
24
- 25 471 18. Msall ME, Buck GM, Rogers BT, Catanzaro NL. Kindergarten readiness after extreme prematurity.  
26  
27 472 *Am J Dis Child.* 1992 Nov;146(11):1371-5.  
28
- 29  
30 473 19. Roberts G, Lim J, Doyle LW, Anderson PJ. High rates of school readiness difficulties at 5 years of  
31  
32 474 age in very preterm infants compared with term controls. *J Dev Behav Pediatr.* 2011 Feb-  
33  
34 475 Mar;32(2):117-24.  
35
- 36 476 20. Shah PE, Kaciroti N, Richards B, Lumeng JC. Gestational Age and Kindergarten School Readiness  
37  
38 477 in a National Sample of Preterm Infants. *J Pediatr.* 2016 Nov;178:61-67.  
39
- 40 478 21. Chen JH, Claessens A, Msall ME. Prematurity and school readiness in a nationally representative  
41  
42 479 sample of Australian children: does typically occurring preschool moderate the relationship? *Early Hum*  
43  
44 480 *Dev.* 2014 Feb;90(2):73-9.  
45
- 46 481 22. Poulsen G, Wolke D, Kurinczuk JJ, Boyle EM, Field D, Alfirevic Z, et al. Gestational age and  
47  
48 482 cognitive ability in early childhood: a population-based cohort study. *Paediatr Perinat Epidemiol.* 2013  
49  
50 483 Jul;27(4):371-9.  
51
- 52  
53 484 23. Quigley MA, Poulsen G, Boyle E, Wolke D, Field D, Alfirevic Z, et al. Early term and late preterm  
54  
55 485 birth are associated with poorer school performance at age 5 years: a cohort study. *Archives of Disease*  
56  
57 486 *in Childhood - Fetal and Neonatal Edition.* 2012;97(3):F167-F173.  
58  
59  
60

- 1 487 24. Patrianakos-Hoobler AI, Msall ME, Huo D, Marks JD, Plesha-Troyke S, Schreiber MD. Predicting  
2 school readiness from neurodevelopmental assessments at age 2 years after respiratory distress  
3 488 syndrome in infants born preterm. *Developmental medicine and child neurology*. 2010;52(4):379-385.  
4  
5 489  
6  
7 490 25. McCormick MC, Brooks-Gunn J, Workman-Daniels K, Turner J, Peckham GJ. The Health and  
8 Developmental Status of Very Low—Birth-Weight Children at School Age. *Jama*. 1992;267(16):2204-  
9 491 2208.  
10  
11 492  
12  
13 493 26. Reichman NE. Low birth weight and school readiness. *Future Child*. 2005 Spring;15(1):91-116.  
14  
15  
16 494 27. Roth J, Figlio DN, Chen Y, Ariet M, Carter RL, Resnick MB, et al. Maternal and infant factors  
17 associated with excess kindergarten costs. *Pediatrics*. 2004 Sep;114(3):720-8.  
18 495  
19  
20 21 496 28. Avchen RN, Scott KG, Mason CA. Birth weight and school-age disabilities: a population-based  
22 study. *Am J Epidemiol*. 2001 Nov 15;154(10):895-901.  
23 497  
24  
25 498 29. Noeker M. Neurocognitive Development in Children Experiencing Intrauterine Growth Retardation  
26 and Born Small for Gestational Age: Pathological, Constitutional and Therapeutic Pathways. *Hormone  
27 Research in Paediatrics*. 2005;64(suppl 3)(Suppl. 3):83-88.  
28 499  
29 500  
30  
31 501 30. de Bie HM, Oostrom KJ, Delemarre-van de Waal HA. Brain development, intelligence and  
32 cognitive outcome in children born small for gestational age. *Horm Res Paediatr*. 2010;73(1):6-14.  
33 502  
34  
35 36 503 31. Janus M, Duku E. The School Entry Gap: Socioeconomic, Family, and Health Factors Associated  
37 With Children's School Readiness to Learn. *Early Education and Development*. 2007 Oct 11;18(3):375-  
38 504 403.  
39 505  
40  
41 42 506 32. Mendez LMR, Mihalas ST, Hardesty R. Gender Differences in Academic Development and  
43 Performance. 2006.  
44 507  
45  
46 508 33. Angenent H, De Man A. Intelligence, gender, social maturity, and school readiness in Dutch first-  
47 graders. *Social Behavior & Personality: an international journal*. 1989;17(2).  
48 509  
49  
50 51 510 34. Janus M, Offord DR. Development and psychometric properties of the Early Development  
52 Instrument (EDI): A measure of children's school readiness. *Canadian Journal of Behavioural  
53 511 Science/Revue canadienne des sciences du comportement*. 2007;39(1):1.  
54 512  
55  
56 57 513 35. Martin JA, Hamilton BE, Ventura SJ, Osterman MJ, Kirmeyer S, Mathews TJ, et al. Births: final  
58 data for 2009. *Natl Vital Stat Rep*. 2011 Nov 3;60(1):1-70.  
59 514  
60



- 1 515 36. Puccio G, Giuffré M, Piccione M, Piro E, Malerba V, Corsello G. Intrauterine growth pattern and  
2 birthweight discordance in twin pregnancies: a retrospective study. *Italian Journal of Pediatrics*.  
3 516 2014;40(1):43.  
4  
5 517  
6  
7 518 37. Lorenz JM. Neurodevelopmental outcomes of twins. *Seminars in perinatology*. 2012;36(3):201-  
8 212.  
9 519  
10  
11  
12 520 38. Wilson RS. Twins: Patterns of cognitive development as measured on the Wechsler Preschool and  
13 Primary Scale of Intelligence. *Developmental Psychology*. 1975;11(2):126-134.  
14 521  
15  
16 522 39. Heckman J. Schools, skills, and synapses. *Econ Inq*. 2008;46(3):289-324.  
17  
18  
19 523 40. Entwisle DR, Alexander KL. Entry into school: The beginning school transition and educational  
20 stratification in the United States. *Annual review of sociology*. 1993;19(1):401-423.  
21 524  
22  
23 525 41. Friend A, DeFries JC, Olson RK, Pennington B, Harlaar N, Byrne B, et al. Heritability of high  
24 reading ability and its interaction with parental education. *Behavior genetics*. 2009;39(4):427-436.  
25 526  
26  
27  
28 527 42. Harden KP, Turkheimer E, Loehlin JC. Genotype by environment interaction in adolescents'  
29 cognitive aptitude. *Behavior genetics*. 2007;37(2):273-283.  
30 528  
31  
32 529 43. Turkheimer E, Haley A, Waldron M, d'Onofrio B, Gottesman II. Socioeconomic status modifies  
33 heritability of IQ in young children. *Psychological science*. 2003;14(6):623-628.  
34 530  
35  
36  
37 531 44. Rowe DC, Jacobson KC, Van den Oord EJ. Genetic and environmental influences on vocabulary  
38 IQ: Parental education level as moderator. *Child development*. 1999;70(5):1151-1162.  
39 532  
40  
41 533 45. Forget-Dubois N, Dionne G, Lemelin J, Perusse D, Tremblay R, Boivin M. Early child language  
42 mediates the relation between home environment and school readiness. *Child Dev*. 2009 May-  
43 Jun;80(3):736-49.  
44 534  
45 535  
46  
47 536 46. Sadeghi N, Gilmore JH, Gerig G. Twin-singleton developmental study of brain white matter  
48 anatomy. *Human brain mapping*. 2017;38(2):1009-1024.  
49 537  
50  
51  
52 538 47. Gonski D, Boston, K., Greiner, K., Lawrence, C., Scales, B., & Tannock, P. Review of Funding for  
53 Schooling - Final Report. Canberra, ACT; 2011.  
54 539  
55  
56 540 48. The Longitudinal Study of Australian Children Annual statistical report 2013. Melbourne; 2014.  
57  
58  
59 541 49. Begum L, Islam A, Smyth R. Girl power: stipend programs and the education of younger siblings.  
60 *The Journal of Development Studies*. 2017;53(11):1882-1898.  
542



- 1 543 50. Australian Early Development Census National Report 2015. Canberra, Australia; 2016. Available  
2 from: [https://www.aedc.gov.au/Websilk/Handlers/ResourceDocument.ashx?id=45cf2664-db9a-6d2b-  
3 544 9fad-ff0000a141dd](https://www.aedc.gov.au/Websilk/Handlers/ResourceDocument.ashx?id=45cf2664-db9a-6d2b-9fad-ff0000a141dd)  
4  
5 545
- 6  
7 546 51. Holman CDAJ, Bass JA, Rosman DL, Smith MB, Semmens JB, Glasson EJ, et al. A decade of data  
8 linkage in Western Australia: strategic design, applications and benefits of the WA data linkage system.  
9 547 Australian Health Review. 2008;32(4):766-777.  
10  
11 548
- 12  
13 549 52. McMillan J, Beavis A, Jones F. The AUSEI06:A new socioeconomic index for Australia. J Sociol.  
14 2009;45(2):123-149.  
15 550  
16  
17
- 18 551 53. Blair EM, Liu Y, de Klerk NH, Lawrence DM. Optimal fetal growth for the Caucasian singleton  
19 and assessment of appropriateness of fetal growth: an analysis of a total population perinatal database.  
20 552 BMC Pediatrics. 2005 2005/05/24;5(1):13.  
21 553  
22  
23
- 24 554 54. Pereira G, Blair E, Lawrence D. Validation of a model for optimal birth weight: a prospective study  
25 using serial ultrasounds. BMC Pediatr. 2012 Jun 15;12:73.  
26 555  
27  
28
- 29 556 55. SAS Institute. SAS Cary, NC: SAS Institute. Inc; 2013.  
30  
31
- 32 557 56. Falster K, Hanly M, Banks E, Lynch J, Chambers G, Brownell M, et al. Maternal age and offspring  
33 558 developmental vulnerability at age five: A population-based cohort study of Australian children. PLOS  
34 Medicine. 2018;15(4):e1002558.  
35 559  
36  
37
- 38 560 57. Guthridge S, Li L, Silburn S, Li SQ, McKenzie J, Lynch J. Early influences on developmental  
39 561 outcomes among children, at age 5, in Australia's Northern Territory. Early Childhood Research  
40 Quarterly. 2016;35:124-134.  
41 562  
42  
43
- 44 563 58. Chittleborough CR, Searle AK, Smithers LG, Brinkman S, Lynch JW. How well can poor child  
45 564 development be predicted from early life characteristics?: A whole-of-population data linkage study.  
46 Early Childhood Research Quarterly. 2016 2016/04/01;35:19-30.  
47 565  
48  
49
- 50 566 59. Lemelin J-P, Boivin M, Forget-Dubois N, Dionne G, Séguin JR, Brendgen M, et al. The Genetic-  
51 567 Environmental Etiology of Cognitive School Readiness and Later Academic Achievement in Early  
52 Childhood. Child Development. 2007;78(6):1855-1869.  
53 568  
54  
55
- 56 569 60. Twins Research Australia (TRA). Multiple perspectives: what support do multiple birth families  
57 need to live happy and healthy lives. Melbourne; 2019.  
58 570  
59  
60

- 1 571 61. Goldfeld S, O'Connor M, Mithen J, Sayers M, Brinkman S. Early development of emerging and  
2 English-proficient bilingual children at school entry in an Australian population cohort. *International*  
3 572 *Journal of Behavioral Development*. 2014;38(1):42-51.  
4  
5 573  
6  
7 574 62. Guhn M, Gadermann A, Almas A, Schonert-Reichl K, Hertzman C. Associations of teacher-rated  
8 social, emotional, and cognitive development in kindergarten to self-reported wellbeing, peer relations,  
9 575 and academic test scores in middle childhood. *Early Child Res Q*. 2016;35:76-84.  
10  
11 576  
12  
13 577 63. Australian Bureau of Statistics. 2016 Census QuickStats Western Australia. Canberra; 2017.  
14 Available from:  
15 [https://quickstats.censusdata.abs.gov.au/census\\_services/getproduct/census/2016/quickstat/5?opendoc](https://quickstats.censusdata.abs.gov.au/census_services/getproduct/census/2016/quickstat/5?opendoc)  
16 [ument](#)  
17  
18  
19 580  
20  
21 581 64. Statistics Canada. Visual Census. Ottawa.; 2012 [cited 2020 June 20]. Available from:  
22 <http://www12.statcan.gc.ca/census-recensement/2011/dp-pd/vc->  
23 [rv/index.cfm?Lang=ENG&TOPIC\\_ID=4&GEOCODE=59](#)  
24  
25 583  
26  
27 584 65. Tsou M-T, Tsou M-W, Wu M-P, Liu J-T. Academic achievement of twins and singletons in early  
28 adulthood: Taiwanese cohort study. *BMJ*. 2008;337:a438.  
29  
30  
31  
32 586 66. Record RG, McKeown T, Edwards JH. An investigation of the difference in measured intelligence  
33 between twins and single births. *Annals of Human Genetics*. 1970;34(1):11-20.  
34  
35  
36 588 67. Brooks-Gunn J, Han WJ, Waldfogel J. Maternal employment and child cognitive outcomes in the  
37 first three years of life: the NICHD Study of Early Child Care. *National Institute of Child Health and*  
38 *Human Development*. *Child Dev*. 2002 Jul-Aug;73(4):1052-72.  
39  
40 590  
41  
42 591 68. Dearing E, McCartney K, Taylor BA. Change in family income-to-needs matters more for children  
43 with less. *Child Development*. 2001;72(6):1779-1793.  
44  
45  
46  
47 593 69. Abbott-Shim M, Lambert R, McCarty F. A Comparison of School Readiness Outcomes for  
48 Children Randomly Assigned to a Head Start Program and the Program's Wait List. *Journal of*  
49 *Education for Students Placed at Risk*. 2003;8(2):191-214.  
50  
51 595  
52  
53 596 70. Ramey CT, Ramey SL. Early learning and school readiness: Can early intervention make a  
54 difference? *Merrill-Palmer Quarterly*. 2004:471-491.  
55  
56  
57 598  
58  
59  
60

1 599 **Figures & Tables: (Total 1 Figure & 2 Tables)**  
2

3  
4 600 Figure 1. Eligible Cohort and Numbers Included for Analyses.

5 601 AEDC = Australian Early Development Census. WARDA= Western Australian Register of Developmental Anomalies.  
6  
7  
8  
9  
10  
11  
12  
13  
14  
15  
16  
17  
18  
19  
20  
21  
22  
23  
24  
25  
26  
27  
28  
29  
30  
31  
32  
33  
34  
35  
36  
37  
38  
39  
40  
41  
42  
43  
44  
45  
46  
47  
48  
49  
50  
51  
52  
53  
54  
55  
56  
57  
58  
59  
60

For peer review only

1 602 Table 1. Risk factors for children who are developmentally vulnerable on one or more AEDC domains  
 2 603 (DVI).

| Characteristic                                            | DV1<br>(N=431)<br>N (%) | NDV1<br>(N=1,225)<br>N (%) | Bivariate                |                  | Multivariable<br>(N=1,352) |                  |
|-----------------------------------------------------------|-------------------------|----------------------------|--------------------------|------------------|----------------------------|------------------|
|                                                           |                         |                            | OR [95% CI]              | p-value          | aOR [95% CI]               | p-value          |
| <b>Maternal</b>                                           |                         |                            |                          |                  |                            |                  |
| <b>Age at Time of Child's Birth (years)</b>               |                         |                            |                          |                  |                            |                  |
| <25                                                       | 105 (24.36)             | 117 (9.55)                 | <b>9.66 [3.68-25.32]</b> | <b>&lt;0.001</b> | <b>7.06 [2.29-21.76]</b>   | <b>&lt;0.001</b> |
| 25-29                                                     | 90 (20.88)              | 294 (24.00)                | 1 [referent]             |                  | 1 [referent]               |                  |
| 30-34                                                     | 130 (30.16)             | 476 (38.86)                | 0.81 [0.38-1.72]         | 0.576            | 0.89 [0.38-2.07]           | 0.780            |
| ≥35                                                       | 106 (24.59)             | 338 (27.59)                | 1.06 [0.48-2.36]         | 0.886            | 1.19 [0.47-2.99]           | 0.715            |
|                                                           |                         |                            | Overall p-value          | <b>&lt;0.001</b> | Overall p-value            | <b>0.003</b>     |
| <b>Marital Status</b>                                     |                         |                            |                          |                  |                            |                  |
| Married (inc. de facto)                                   | 357 (82.83)             | 1,123 (91.67)              | 1 [referent]             |                  | 1 [referent]               |                  |
| All Other                                                 | 72 (16.71)              | 98 (8.00)                  | <b>5.99 [2.43-14.75]</b> | <b>&lt;0.001</b> | 2.26 [0.76-6.71]           | 0.140            |
| Unavailable                                               | 2 (0.46)                | 4 (0.33)                   |                          |                  |                            |                  |
| <b>Occupational Status Scale at Time of Child's Birth</b> |                         |                            |                          |                  |                            |                  |
| 0-20                                                      | 122 (28.31)             | 187 (15.27)                | <b>5.58 [2.71-11.46]</b> | <b>&lt;0.001</b> | 1.83 [0.79-4.26]           | 0.159            |
| >20-100                                                   | 279 (64.73)             | 1,006 (82.12)              | 1 [referent]             |                  | 1 [referent]               |                  |
| Unavailable                                               | 30 (6.96)               | 32 (2.61)                  |                          |                  |                            |                  |
| <b>Pregnancy &amp; Birth</b>                              |                         |                            |                          |                  |                            |                  |
| <b>Fertility Treatments</b>                               |                         |                            |                          |                  |                            |                  |
| No                                                        | 377 (87.47)             | 1,011 (82.53)              | 1 [referent]             |                  | 1 [referent]               |                  |
| Yes                                                       | 54 (12.53)              | 214 (17.47)                | 0.43 [0.19-0.97]         | 0.042            | 0.84 [0.32-2.23]           | 0.729            |
| <b>Smoking Status During Pregnancy</b>                    |                         |                            |                          |                  |                            |                  |
| No                                                        | 339 (78.65)             | 1,079 (88.08)              | 1 [referent]             |                  | 1 [referent]               |                  |
| Yes                                                       | 92 (21.35)              | 146 (11.92)                | <b>4.31 [1.95-9.53]</b>  | <b>&lt;0.001</b> | 0.87 [0.34-2.27]           | 0.779            |
| <b>Pre-eclampsia</b>                                      |                         |                            |                          |                  |                            |                  |
| No                                                        | 375 (87.01)             | 1,085 (88.57)              | 1 [referent]             |                  | 1 [referent]               |                  |
| Yes                                                       | 56 (12.99)              | 140 (11.43)                | 1.40 [0.59-3.34]         | 0.444            | 1.82 [0.68-4.88]           | 0.237            |
| <b>Gestational Diabetes</b>                               |                         |                            |                          |                  |                            |                  |
| No                                                        | 402 (93.27)             | 1,152 (94.04)              | 1 [referent]             |                  | 1 [referent]               |                  |
| Yes                                                       | 29 (6.73)               | 73 (5.96)                  | 1.30 [0.40-4.22]         | 0.657            | 1.15 [0.33-4.09]           | 0.826            |
| <b>Threatened Abortion</b>                                |                         |                            |                          |                  |                            |                  |
| No                                                        | 416 (96.52)             | 1,156 (94.37)              | 1 [referent]             |                  | 1 [referent]               |                  |
| Yes                                                       | 15 (3.48)               | 69 (5.63)                  | 0.36 [0.09-1.45]         | 0.151            | 0.23 [0.04-1.35]           | 0.103            |
| <b>Other Pregnancy Related Complications</b>              |                         |                            |                          |                  |                            |                  |
| No                                                        | 125 (29.00)             | 451 (36.82)                | 1 [referent]             |                  | 1 [referent]               |                  |
| Yes                                                       | 306 (71.00)             | 774 (63.18)                | <b>2.08 [1.12-3.85]</b>  | <b>0.020</b>     | 1.79 [0.85-3.79]           | 0.129            |
| <b>Threatened Preterm Labour</b>                          |                         |                            |                          |                  |                            |                  |
| No                                                        | 376 (87.24)             | 1,088 (88.82)              | 1 [referent]             |                  | 1 [referent]               |                  |
| Yes                                                       | 55 (12.76)              | 137 (11.18)                | 1.34 [0.55-3.24]         | 0.519            | 0.68 [0.25-1.83]           | 0.446            |
| <b>APH</b>                                                |                         |                            |                          |                  |                            |                  |
| No                                                        | 411 (95.36)             | 1,187 (96.90)              | 1 [referent]             |                  | 1 [referent]               |                  |
| Yes                                                       | 20 (4.64)               | 38 (3.10)                  | 2.38 [0.53-10.73]        | 0.260            | 0.67 [0.12-3.85]           | 0.650            |
| <b>Placenta Praevia <sup>a</sup></b>                      |                         |                            |                          |                  |                            |                  |
| No                                                        | 429 (99.54)             | 1,217 (99.35)              |                          |                  |                            |                  |
| Yes                                                       | 2 (0.46)                | 8 (0.65)                   |                          |                  |                            |                  |
| <b>Placental Abruption <sup>a</sup></b>                   |                         |                            |                          |                  |                            |                  |
| No                                                        | 427 (99.07)             | 1,223 (99.84)              |                          |                  |                            |                  |
| Yes                                                       | 4 (0.93)                | 2 (0.16)                   |                          |                  |                            |                  |
| <b>Fetal Distress</b>                                     |                         |                            |                          |                  |                            |                  |
| No                                                        | 382 (88.63)             | 1,136 (92.73)              | 1 [referent]             |                  | 1 [referent]               |                  |
| Yes                                                       | 49 (11.37)              | 89 (7.27)                  | <b>2.92 [1.13-7.58]</b>  | <b>0.028</b>     | 1.76 [0.60-5.13]           | 0.301            |
| <b>Cephalopelvic Disproportion <sup>a</sup></b>           |                         |                            |                          |                  |                            |                  |
| No                                                        | 431 (100.00)            | 1,221 (99.67)              |                          |                  |                            |                  |
| Yes                                                       | 0 (0.00)                | 4 (0.33)                   |                          |                  |                            |                  |

|                                                             |             |               |                           |                  |                          |                  |
|-------------------------------------------------------------|-------------|---------------|---------------------------|------------------|--------------------------|------------------|
| <b>Prolapsed Cord <sup>a</sup></b>                          |             |               |                           |                  |                          |                  |
| No                                                          | 428 (99.30) | 1,215 (99.18) |                           |                  |                          |                  |
| Yes                                                         | 3 (0.70)    | 10 (0.82)     |                           |                  |                          |                  |
| <b>Precipitate Delivery <sup>a</sup></b>                    |             |               |                           |                  |                          |                  |
| No                                                          | 424 (98.38) | 1,206 (98.45) |                           |                  |                          |                  |
| Yes                                                         | 7 (1.62)    | 19 (1.55)     |                           |                  |                          |                  |
| <b>PPH ≥500mls</b>                                          |             |               |                           |                  |                          |                  |
| No                                                          | 281 (65.20) | 918 (74.94)   | 1 [referent]              |                  | 1 [referent]             |                  |
| Yes                                                         | 150 (34.80) | 307 (25.06)   | <b>2.59 [1.39-4.82]</b>   | <b>0.003</b>     | 1.52 [0.73-3.16]         | 0.260            |
| <b>TSR ≥2mins</b>                                           |             |               |                           |                  |                          |                  |
| No                                                          | 364 (84.45) | 1,060 (86.53) | 1 [referent]              |                  | 1 [referent]             |                  |
| Yes                                                         | 67 (15.55)  | 165 (13.47)   | 1.06 [0.56-1.99]          | 0.863            | 0.52 [0.22-1.21]         | 0.128            |
| <b>Apgar 5-minutes &lt;7 <sup>a</sup></b>                   |             |               |                           |                  |                          |                  |
| No                                                          | 425 (98.61) | 1,198 (97.80) |                           |                  |                          |                  |
| Yes                                                         | 6 (1.39)    | 27 (2.20)     |                           |                  |                          |                  |
| <b>Intubation</b>                                           |             |               |                           |                  |                          |                  |
| No                                                          | 353 (81.90) | 1,036 (84.57) | 1 [referent]              |                  | 1 [referent]             |                  |
| Yes                                                         | 78 (18.10)  | 189 (15.43)   | 1.36 [0.75-2.45]          | 0.313            | 1.54 [0.71-3.37]         | 0.277            |
| <b>Early Preterm Birth</b>                                  |             |               |                           |                  |                          |                  |
| No                                                          | 352 (81.67) | 1,058 (86.37) | 1 [referent]              |                  | 1 [referent]             |                  |
| Yes                                                         | 79 (18.33)  | 167 (13.63)   | 2.08 [0.94-4.56]          | 0.069            | 1.29 [0.53-3.15]         | 0.579            |
| <b>POBW &lt;15<sup>th</sup> Percentile</b>                  |             |               |                           |                  |                          |                  |
| No                                                          | 305 (70.77) | 926 (75.59)   | 1 [referent]              |                  | 1 [referent]             |                  |
| Yes                                                         | 81 (18.79)  | 136 (11.10)   | <b>2.09 [1.14-3.84]</b>   | <b>0.017</b>     | <b>2.06 [1.07-3.98]</b>  | <b>0.031</b>     |
| Unavailable                                                 | 45 (10.44)  | 163 (13.31)   |                           |                  |                          |                  |
| <b>Parity</b>                                               |             |               |                           |                  |                          |                  |
| 0                                                           | 150 (34.80) | 512 (41.80)   | 1 [referent]              |                  | 1 [referent]             |                  |
| 1                                                           | 154 (35.73) | 429 (35.02)   | 1.62 [0.83-3.16]          | 0.158            | 1.96 [0.77-5.00]         | 0.159            |
| ≥2                                                          | 127 (29.47) | 284 (23.18)   | <b>2.50 [1.20-5.22]</b>   | <b>0.015</b>     | 2.03 [0.55-7.48]         | 0.288            |
|                                                             |             |               | Overall p-value           | <b>0.048</b>     | Overall p-value          | 0.351            |
| <b>Child</b>                                                |             |               |                           |                  |                          |                  |
| <b>Sex</b>                                                  |             |               |                           |                  |                          |                  |
| Female                                                      | 176 (40.84) | 674 (55.02)   | 1 [referent]              |                  | 1 [referent]             |                  |
| Male                                                        | 255 (59.16) | 551 (44.98)   | <b>4.44 [2.68-7.36]</b>   | <b>&lt;0.001</b> | <b>5.08 [2.89-8.92]</b>  | <b>&lt;0.001</b> |
| <b>Ethnicity</b>                                            |             |               |                           |                  |                          |                  |
| Other                                                       | 385 (89.33) | 1,187 (96.90) | 1 [referent]              |                  | 1 [referent]             |                  |
| Indigenous Australian                                       | 46 (10.67)  | 38 (3.10)     | <b>16.98 [4.85-59.46]</b> | <b>&lt;0.001</b> | 2.46 [0.46-13.03]        | 0.291            |
| <b>Child Speaks Language Other Than English at Home</b>     |             |               |                           |                  |                          |                  |
| No                                                          | 367 (85.15) | 1,149 (93.80) | 1 [referent]              |                  | 1 [referent]             |                  |
| Yes                                                         | 64 (14.85)  | 76 (6.20)     | <b>6.28 [2.48-15.90]</b>  | <b>&lt;0.001</b> | <b>6.45 [2.17-19.17]</b> | <b>&lt;0.001</b> |
| <b>Age Category at Time of AEDC Completion <sup>b</sup></b> |             |               |                           |                  |                          |                  |
| 1                                                           | 109 (25.29) | 212 (17.31)   | <b>2.93 [1.45-5.90]</b>   | <b>0.003</b>     | <b>3.34 [1.55-7.22]</b>  | <b>0.002</b>     |
| 2                                                           | 288 (66.82) | 911 (74.37)   | 1 [referent]              |                  | 1 [referent]             |                  |
| 3                                                           | 34 (7.89)   | 102 (8.33)    | 1.18 [0.43-3.27]          | 0.746            | 0.77 [0.23-2.54]         | 0.666            |
|                                                             |             |               | Overall p-value           | <b>0.011</b>     | Overall p-value          | <b>0.006</b>     |
| <b>Total Number of Siblings</b>                             |             |               |                           |                  |                          |                  |
| 1                                                           | 119 (27.61) | 389 (31.76)   | 1 [referent]              |                  | 1 [referent]             |                  |
| 2                                                           | 160 (37.12) | 494 (40.33)   | 1.15 [0.58-2.30]          | 0.685            | 0.70 [0.27-1.83]         | 0.461            |
| 3                                                           | 74 (17.17)  | 240 (19.59)   | 1.04 [0.45-2.41]          | 0.926            | 0.44 [0.13-1.55]         | 0.120            |
| >3                                                          | 78 (18.10)  | 102 (8.33)    | <b>7.28 [2.73-19.45]</b>  | <b>&lt;0.001</b> | 2.71 [0.60-12.22]        | 0.194            |
|                                                             |             |               | Overall p-value           | <b>&lt;0.001</b> | Overall p-value          | <b>0.025</b>     |
| <b>Sociodemographic</b>                                     |             |               |                           |                  |                          |                  |
| <b>Index of Relative Socioeconomic Disadvantage</b>         |             |               |                           |                  |                          |                  |
| Lowest Quintile                                             | 327 (75.87) | 1,046 (85.39) | <b>3.55 [1.62-7.78]</b>   | <b>0.002</b>     | 1.63 [0.66-4.02]         | 0.287            |
| > Lowest Quintile                                           | 87 (20.19)  | 150 (12.24)   | 1 [referent]              |                  | 1 [referent]             |                  |
| Unavailable                                                 | 17 (3.94)   | 29 (2.37)     |                           |                  |                          |                  |

<sup>a</sup> Excluded from multivariable analysis due to small N.

1 605 <sup>b</sup> Age categories classified as; 1) ≥3 years 10 months to <5 years and one month, 2) ≥5 years and one month to <5 years  
2 606 and 10 months (reference category), 3) ≥5 years and 10 months to <6 years 10 months.  
3  
4  
5  
6  
7  
8  
9  
10  
11  
12  
13  
14  
15  
16  
17  
18  
19  
20  
21  
22  
23  
24  
25  
26  
27  
28  
29  
30  
31  
32  
33  
34  
35  
36  
37  
38  
39  
40  
41  
42  
43  
44  
45  
46  
47  
48  
49  
50  
51  
52  
53  
54  
55  
56  
57  
58  
59  
60

For peer review only

Table 2. Risk factors for children who are developmentally vulnerable on two or more AEDC domains (DV2).

| Characteristic                                            | DV2<br>(N=223)<br>N (%) | NDV2<br>(N=1,433)<br>N (%) | Bivariate                |                  | Multivariable<br>(N=1,352) |              |
|-----------------------------------------------------------|-------------------------|----------------------------|--------------------------|------------------|----------------------------|--------------|
|                                                           |                         |                            | OR [95% CI]              | p-value          | aOR [95% CI]               | p-value      |
| <b>Maternal</b>                                           |                         |                            |                          |                  |                            |              |
| <b>Age at Time of Child's Birth (years)</b>               |                         |                            |                          |                  |                            |              |
| <25                                                       | 63 (28.25)              | 159 (11.10)                | <b>7.81 [2.60-23.45]</b> | <b>&lt;0.001</b> | <b>5.60 [1.30-24.10]</b>   | <b>0.021</b> |
| 25-29                                                     | 48 (21.52)              | 336 (23.45)                | 1 [referent]             |                  | 1 [referent]               |              |
| 30-34                                                     | 64 (28.70)              | 542 (37.82)                | 0.65 [0.26-1.63]         | 0.356            | 0.92 [0.29-2.91]           | 0.885        |
| ≥35                                                       | 48 (21.52)              | 396 (27.63)                | 0.67 [0.25-1.81]         | 0.434            | 0.77 [0.22-2.76]           | 0.689        |
|                                                           |                         |                            | Overall p-value          | <b>&lt;0.001</b> | Overall p-value            | 0.072        |
| <b>Marital Status</b>                                     |                         |                            |                          |                  |                            |              |
| Married (inc. de facto)                                   | 172 (77.13)             | 1,308 (91.28)              | 1 [referent]             |                  | 1 [referent]               |              |
| All Other                                                 | 49 (21.97)              | 121 (8.44)                 | <b>9.91 [3.54-27.77]</b> | <b>&lt;0.001</b> | <b>4.59 [1.13-18.55]</b>   | <b>0.033</b> |
| Unavailable                                               | 2 (0.90)                | 4 (0.28)                   |                          |                  |                            |              |
| <b>Occupational Status Scale at Time of Child's Birth</b> |                         |                            |                          |                  |                            |              |
| 0-20                                                      | 78 (34.98)              | 231 (16.12)                | <b>8.82 [3.72-20.89]</b> | <b>&lt;0.001</b> | <b>3.30 [1.11-9.81]</b>    | <b>0.032</b> |
| >20-100                                                   | 130 (58.30)             | 1,155 (80.60)              | 1 [referent]             |                  | 1 [referent]               |              |
| Unavailable                                               | 15 (6.73)               | 47 (3.28)                  |                          |                  |                            |              |
| <b>Pregnancy &amp; Birth</b>                              |                         |                            |                          |                  |                            |              |
| <b>Fertility Treatments</b>                               |                         |                            |                          |                  |                            |              |
| No                                                        | 200 (89.69)             | 1,188 (82.90)              | 1 [referent]             |                  | 1 [referent]               |              |
| Yes                                                       | 23 (10.31)              | 245 (17.10)                | <b>0.35 [0.13-0.97]</b>  | <b>0.042</b>     | 0.67 [0.17-2.69]           | 0.567        |
| <b>Smoking Status During Pregnancy</b>                    |                         |                            |                          |                  |                            |              |
| No                                                        | 166 (74.44)             | 1,252 (87.37)              | 1 [referent]             |                  | 1 [referent]               |              |
| Yes                                                       | 57 (25.56)              | 181 (12.63)                | <b>5.83 [2.32-14.65]</b> | <b>&lt;0.001</b> | 1.27 [0.38-4.30]           | 0.700        |
| <b>Pre-eclampsia</b>                                      |                         |                            |                          |                  |                            |              |
| No                                                        | 195 (87.44)             | 1,265 (88.28)              | 1 [referent]             |                  | 1 [referent]               |              |
| Yes                                                       | 28 (12.56)              | 168 (11.72)                | 1.25 [0.41-3.86]         | 0.693            | 2.45 [0.65-9.17]           | 0.184        |
| <b>Gestational Diabetes</b>                               |                         |                            |                          |                  |                            |              |
| No                                                        | 208 (93.27)             | 1,346 (93.93)              | 1 [referent]             |                  | 1 [referent]               |              |
| Yes                                                       | 15 (6.73)               | 87 (6.07)                  | 1.44 [0.32-6.42]         | 0.635            | 2.29 [0.46-11.44]          | 0.312        |
| <b>Threatened Abortion</b>                                |                         |                            |                          |                  |                            |              |
| No                                                        | 214 (95.96)             | 1,358 (94.77)              | 1 [referent]             |                  | 1 [referent]               |              |
| Yes                                                       | 9 (4.04)                | 75 (5.23)                  | 0.54 [0.10-2.94]         | 0.478            | 0.24 [0.02-3.08]           | 0.274        |
| <b>Other Pregnancy Related Complications</b>              |                         |                            |                          |                  |                            |              |
| No                                                        | 57 (25.56)              | 519 (36.22)                | 1 [referent]             |                  | 1 [referent]               |              |
| Yes                                                       | 166 (74.44)             | 914 (63.78)                | <b>2.64 [1.22-5.69]</b>  | <b>0.014</b>     | 1.64 [0.58-4.61]           | 0.351        |
| <b>Threatened Preterm Labour</b>                          |                         |                            |                          |                  |                            |              |
| No                                                        | 191 (85.65)             | 1,273 (88.83)              | 1 [referent]             |                  | 1 [referent]               |              |
| Yes                                                       | 32 (14.35)              | 160 (11.17)                | 2.04 [0.66-6.29]         | 0.216            | 0.72 [0.20-2.61]           | 0.613        |
| <b>APH</b>                                                |                         |                            |                          |                  |                            |              |
| No                                                        | 209 (93.72)             | 1,389 (96.93)              | 1 [referent]             |                  | 1 [referent]               |              |
| Yes                                                       | 14 (6.28)               | 44 (3.07)                  | 5.96 [0.95-37.40]        | 0.057            | 1.45 [0.36-5.87]           | 0.599        |
| <b>Placenta Praevia<sup>a</sup></b>                       |                         |                            |                          |                  |                            |              |
| No                                                        | 223 (100.00)            | 1,423 (99.30)              |                          |                  |                            |              |
| Yes                                                       | 0 (0.00)                | 10 (0.70)                  |                          |                  |                            |              |
| <b>Placental Abruption<sup>a</sup></b>                    |                         |                            |                          |                  |                            |              |
| No                                                        | 221 (99.10)             | 1,429 (99.72)              |                          |                  |                            |              |
| Yes                                                       | 2 (0.90)                | 4 (0.28)                   |                          |                  |                            |              |
| <b>Fetal Distress</b>                                     |                         |                            |                          |                  |                            |              |
| No                                                        | 195 (87.44)             | 1,323 (92.32)              | 1 [referent]             |                  | 1 [referent]               |              |
| Yes                                                       | 28 (12.56)              | 110 (7.68)                 | 3.03 [0.90-10.23]        | 0.074            | 1.56 [0.59-4.15]           | 0.368        |
| <b>Cephalopelvic Disproportion<sup>a</sup></b>            |                         |                            |                          |                  |                            |              |
| No                                                        | 223 (100.00)            | 1,429 (99.72)              |                          |                  |                            |              |
| Yes                                                       | 0 (0.00)                | 4 (0.28)                   |                          |                  |                            |              |



|                                                         |             |               |                           |                  |                          |                  |
|---------------------------------------------------------|-------------|---------------|---------------------------|------------------|--------------------------|------------------|
| <b>Prolapsed Cord<sup>a</sup></b>                       |             |               |                           |                  |                          |                  |
| No                                                      | 220 (98.65) | 1,423 (99.30) |                           |                  |                          |                  |
| Yes                                                     | 3 (1.35)    | 10 (0.70)     |                           |                  |                          |                  |
| <b>Precipitate Delivery<sup>a</sup></b>                 |             |               |                           |                  |                          |                  |
| No                                                      | 219 (98.21) | 1,411 (98.46) |                           |                  |                          |                  |
| Yes                                                     | 4 (1.79)    | 22 (1.54)     |                           |                  |                          |                  |
| <b>PPH ≥500mls</b>                                      |             |               |                           |                  |                          |                  |
| No                                                      | 141 (63.23) | 1,058 (73.83) | 1 [referent]              |                  | 1 [referent]             |                  |
| Yes                                                     | 82 (36.77)  | 375 (26.17)   | <b>3.43 [1.49-7.94]</b>   | <b>0.004</b>     | 1.38 [0.16-11.79]        | 0.766            |
| <b>TSR ≥2mins</b>                                       |             |               |                           |                  |                          |                  |
| No                                                      | 183 (82.06) | 1,241 (86.60) | 1 [referent]              |                  | 1 [referent]             |                  |
| Yes                                                     | 40 (17.94)  | 192 (13.40)   | 1.78 [0.81-3.89]          | 0.149            | 0.91 [0.30-2.72]         | 0.863            |
| <b>Apgar 5-minutes &lt;7<sup>a</sup></b>                |             |               |                           |                  |                          |                  |
| No                                                      | 219 (98.21) | 1,404 (97.98) |                           |                  |                          |                  |
| Yes                                                     | 4 (1.79)    | 29 (2.02)     |                           |                  |                          |                  |
| <b>Intubation</b>                                       |             |               |                           |                  |                          |                  |
| No                                                      | 178 (79.82) | 1,211 (84.51) | 1 [referent]              |                  | 1 [referent]             |                  |
| Yes                                                     | 45 (20.18)  | 222 (15.49)   | 1.91 [0.90-4.05]          | 0.093            | 1.53 [0.54-4.35]         | 0.429            |
| <b>Early Preterm Birth</b>                              |             |               |                           |                  |                          |                  |
| No                                                      | 172 (77.13) | 1,238 (86.39) | 1 [referent]              |                  | 1 [referent]             |                  |
| Yes                                                     | 51 (22.87)  | 195 (13.61)   | <b>4.18 [1.50-11.67]</b>  | <b>0.006</b>     | 2.06 [0.64-6.58]         | 0.224            |
| <b>POBW &lt;15<sup>th</sup> Percentile</b>              |             |               |                           |                  |                          |                  |
| No                                                      | 162 (72.65) | 1,069 (74.60) | 1 [referent]              |                  | 1 [referent]             |                  |
| Yes                                                     | 42 (18.83)  | 175 (12.21)   | <b>2.72 [1.25-5.93]</b>   | <b>0.012</b>     | <b>3.11 [1.26-7.64]</b>  | <b>0.014</b>     |
| Unavailable                                             | 19 (8.52)   | 189 (13.19)   |                           |                  |                          |                  |
| <b>Parity</b>                                           |             |               |                           |                  |                          |                  |
| 0                                                       | 79 (35.43)  | 583 (40.68)   | 1 [referent]              |                  | 1 [referent]             |                  |
| 1                                                       | 73 (32.74)  | 510 (35.59)   | 1.18 [0.51-2.76]          | 0.700            | 1.12 [0.31-4.04]         | 0.861            |
| ≥2                                                      | 71 (31.84)  | 340 (23.73)   | <b>2.66 [1.04-6.83]</b>   | <b>0.042</b>     | 3.61 [0.61-21.22]        | 0.155            |
|                                                         |             |               | Overall p-value           | 0.109            | Overall p-value          | 0.283            |
| <b>Child</b>                                            |             |               |                           |                  |                          |                  |
| <b>Sex</b>                                              |             |               |                           |                  |                          |                  |
| Female                                                  | 83 (37.22)  | 767 (53.52)   | 1 [referent]              |                  | 1 [referent]             |                  |
| Male                                                    | 140 (62.78) | 666 (46.48)   | <b>5.42 [2.79-10.55]</b>  | <b>&lt;0.001</b> | <b>7.87 [3.45-17.97]</b> | <b>&lt;0.001</b> |
| <b>Ethnicity</b>                                        |             |               |                           |                  |                          |                  |
| Other                                                   | 197 (88.34) | 1,375 (95.95) | 1 [referent]              |                  | 1 [referent]             |                  |
| Indigenous Australian                                   | 26 (11.66)  | 58 (4.05)     | <b>11.00 [2.78-43.60]</b> | <b>&lt;0.001</b> | 2.32 [0.32-16.84]        | 0.404            |
| <b>Child Speaks Language Other Than English at Home</b> |             |               |                           |                  |                          |                  |
| No                                                      | 192 (86.10) | 1,324 (92.39) | 1 [referent]              |                  | 1 [referent]             |                  |
| Yes                                                     | 31 (13.90)  | 109 (7.61)    | 3.19 [0.96-10.63]         | 0.059            | <b>4.65 [1.14-19.03]</b> | <b>0.033</b>     |
| <b>Age Category at Time of AEDC Completion</b>          |             |               |                           |                  |                          |                  |
| 1                                                       | 66 (29.60)  | 255 (17.79)   | <b>4.11 [1.80-9.39]</b>   | <b>&lt;0.001</b> | <b>5.36 [1.94-14.82]</b> | <b>0.001</b>     |
| 2                                                       | 142 (63.68) | 1,057 (73.76) | 1 [referent]              |                  | 1 [referent]             |                  |
| 3                                                       | 15 (6.73)   | 121 (8.44)    | 0.95 [0.26-3.46]          | 0.942            | 0.28 [0.05-1.70]         | 0.167            |
|                                                         |             |               | Overall p-value           | <b>0.003</b>     | Overall p-value          | <b>0.001</b>     |
| <b>Total Number of Siblings</b>                         |             |               |                           |                  |                          |                  |
| 1                                                       | 58 (26.01)  | 450 (31.40)   | 1 [referent]              |                  | 1 [referent]             |                  |
| 2                                                       | 84 (37.67)  | 570 (39.78)   | 1.35 [0.57-3.19]          | 0.489            | 1.26 [0.34-4.71]         | 0.733            |
| 3                                                       | 38 (17.04)  | 276 (19.26)   | 1.14 [0.40-3.24]          | 0.810            | 0.47 [0.08-2.70]         | 0.395            |
| >3                                                      | 43 (19.28)  | 137 (9.56)    | <b>7.14 [2.24-22.72]</b>  | <b>&lt;0.001</b> | 2.52 [0.34-18.73]        | 0.366            |
|                                                         |             |               | Overall p-value           | <b>0.006</b>     | Overall p-value          | 0.175            |
| <b>Sociodemographic</b>                                 |             |               |                           |                  |                          |                  |
| <b>Index of Relative Socioeconomic Disadvantage</b>     |             |               |                           |                  |                          |                  |
| Lowest Quintile                                         | 175 (78.48) | 1,198 (83.60) | 2.14 [0.76-6.02]          | 0.151            | 0.68 [0.21-2.25]         | 0.529            |
| > Lowest Quintile                                       | 39 (17.49)  | 198 (13.82)   | 1 [referent]              |                  | 1 [referent]             |                  |
| Unavailable                                             | 9 (4.04)    | 37 (2.58)     |                           |                  |                          |                  |

<sup>a</sup> Excluded from multivariable analysis due to small N.



<sup>b</sup> Age categories classified as; 1)  $\geq 3$  years 10 months to  $< 5$  years and one month, 2)  $\geq 5$  years and one month to  $< 5$  years and 10 months (reference category), 3)  $\geq 5$  years and 10 months to  $< 6$  years 10 months.

For peer review only

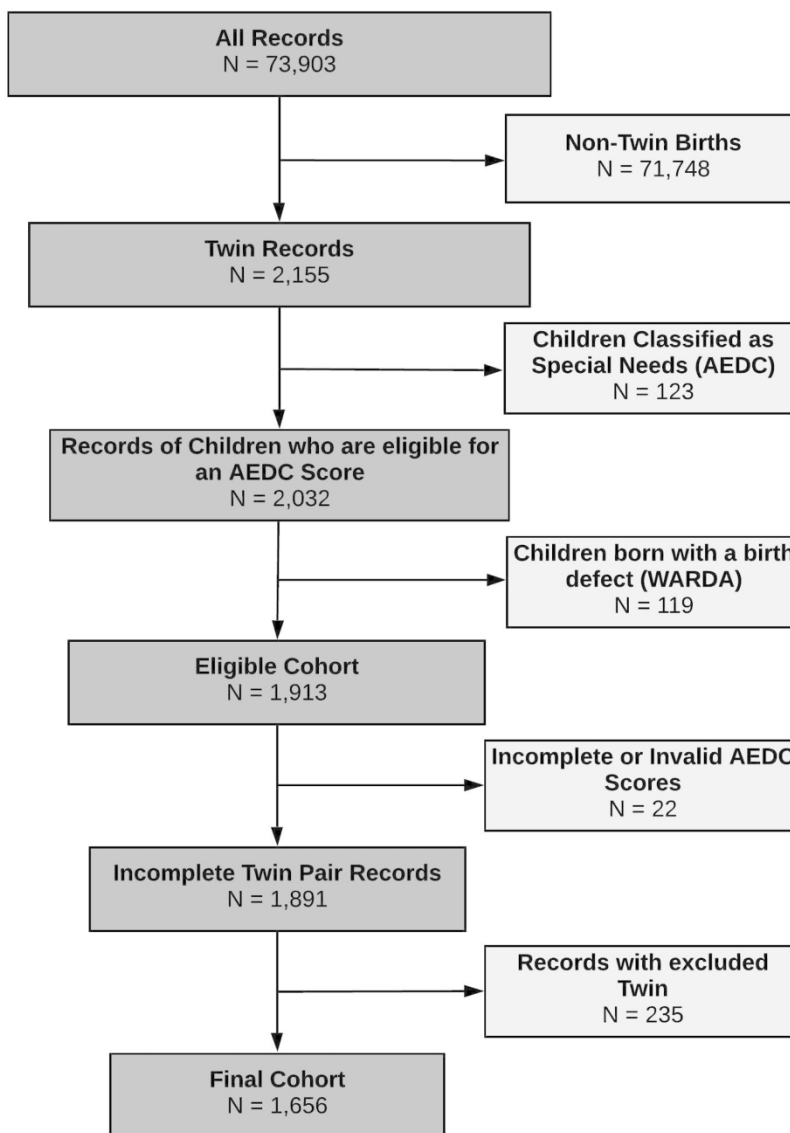

Figure 1. Eligible Cohort and Numbers Included for Analyses. AEDC = Australian Early Development Census. WARDA = Western Australian Register of Developmental Anomalies.

132x182mm (400 x 400 DPI)

## Supplementary Tables

Table 1. Risk Factors for Developmental Vulnerability on the Physical Health &amp; Wellbeing Domain.

| Characteristic                                            | DV<br>(N=188)<br>N (%) | NDV<br>(N=1,468)<br>N (%) | Bivariate                |                  | Multivariable<br>(N=1,352) |         |
|-----------------------------------------------------------|------------------------|---------------------------|--------------------------|------------------|----------------------------|---------|
|                                                           |                        |                           | OR [95% CI]              | p-value          | aOR [95% CI]               | p-value |
| <b>Maternal</b>                                           |                        |                           |                          |                  |                            |         |
| <b>Age at Time of Child's Birth (years)</b>               |                        |                           |                          |                  |                            |         |
| <25                                                       | 46 (24.47)             | 176 (11.99)               | <b>5.36 [1.64-17.48]</b> | <b>0.002</b>     | 3.59 [0.93-13.90]          | 0.065   |
| 25-29                                                     | 39 (20.74)             | 345 (23.50)               | 1 [referent]             |                  | 1 [referent]               |         |
| 30-34                                                     | 62 (32.98)             | 544 (37.06)               | 1.08 [0.41-2.87]         | 0.646            | 1.13 [0.39-3.25]           | 0.821   |
| ≥35                                                       | 41 (21.81)             | 403 (27.45)               | 0.83 [0.29-2.38]         | 0.776            | 0.97 [0.30-3.13]           | 0.959   |
|                                                           |                        |                           | Overall p-value          | <b>0.009</b>     | Overall p-value            | 0.269   |
| <b>Marital Status</b>                                     |                        |                           |                          |                  |                            |         |
| Married (inc. de facto)                                   | 152 (80.85)            | 1,328 (90.46)             | 1 [referent]             |                  | 1 [referent]               |         |
| All Other                                                 | 36 (19.15)             | 134 (9.13)                | <b>5.54 [1.87-16.35]</b> | <b>0.002</b>     | 2.39 [0.66-8.70]           | 0.185   |
| Unavailable                                               | 0 (0.00)               | 6 (0.41)                  |                          |                  |                            |         |
| <b>Occupational Status Scale at Time of Child's Birth</b> |                        |                           |                          |                  |                            |         |
| 0-20                                                      | 52 (27.66)             | 257 (17.51)               | <b>3.29 [1.40-7.75]</b>  | <b>0.025</b>     | 0.79 [0.28-2.27]           | 0.663   |
| >20-100                                                   | 119 (63.30)            | 1,166 (79.43)             | 1 [referent]             |                  | 1 [referent]               |         |
| Unavailable                                               | 17 (9.04)              | 45 (3.07)                 |                          |                  |                            |         |
| <b>Pregnancy &amp; Birth</b>                              |                        |                           |                          |                  |                            |         |
| <b>Fertility Treatments</b>                               |                        |                           |                          |                  |                            |         |
| No                                                        | 163 (86.70)            | 1,225 (83.45)             | 1 [referent]             |                  | 1 [referent]               |         |
| Yes                                                       | 25 (13.30)             | 243 (16.55)               | 0.61 [0.21-1.75]         | 0.359            | 1.07 [0.32-3.62]           | 0.914   |
| <b>Smoking Status During Pregnancy</b>                    |                        |                           |                          |                  |                            |         |
| No                                                        | 134 (71.28)            | 1,284 (87.47)             | 1 [referent]             |                  | 1 [referent]               |         |
| Yes                                                       | 54 (28.72)             | 184 (12.53)               | <b>7.19 [2.76-18.70]</b> | <b>&lt;0.001</b> | 2.49 [0.83-7.51]           | 0.105   |
| <b>Pre-eclampsia</b>                                      |                        |                           |                          |                  |                            |         |
| No                                                        | 163 (86.70)            | 1,297 (88.35)             | 1 [referent]             |                  | 1 [referent]               |         |
| Yes                                                       | 25 (13.30)             | 171 (11.65)               | 1.56 [0.46-5.24]         | 0.475            | 2.99 [0.90-9.91]           | 0.074   |
| <b>Gestational Diabetes</b>                               |                        |                           |                          |                  |                            |         |
| No                                                        | 173 (92.02)            | 1,381 (94.07)             | 1 [referent]             |                  | 1 [referent]               |         |
| Yes                                                       | 15 (7.98)              | 87 (5.93)                 | 1.87 [0.36-9.87]         | 0.460            | 2.26 [0.50-10.20]          | 0.290   |
| <b>Threatened Abortion</b>                                |                        |                           |                          |                  |                            |         |
| No                                                        | 182 (96.81)            | 1,390 (94.69)             | 1 [referent]             |                  | 1 [referent]               |         |
| Yes                                                       | 6 (3.19)               | 78 (5.31)                 | 0.45 [0.07-2.71]         | 0.379            | 0.43 [0.05-3.77]           | 0.443   |
| <b>Other Pregnancy Related Complications</b>              |                        |                           |                          |                  |                            |         |
| No                                                        | 51 (27.13)             | 525 (35.76)               | 1 [referent]             |                  | 1 [referent]               |         |
| Yes                                                       | 137 (72.87)            | 943 (64.24)               | 1.96 [0.87-4.42]         | 0.103            | 1.69 [0.65-4.42]           | 0.284   |
| <b>Threatened Preterm Labour</b>                          |                        |                           |                          |                  |                            |         |
| No                                                        | 161 (85.64)            | 1,303 (88.76)             | 1 [referent]             |                  | 1 [referent]               |         |
| Yes                                                       | 27 (14.36)             | 165 (11.24)               | 1.68 [0.49-5.81]         | 0.411            | 0.86 [0.26-2.82]           | 0.797   |
| <b>APH</b>                                                |                        |                           |                          |                  |                            |         |
| No                                                        | 178 (94.68)            | 1,420 (96.73)             | 1 [referent]             |                  | 1 [referent]               |         |
| Yes                                                       | 10 (5.32)              | 48 (3.27)                 | 3.27 [0.37-28.63]        | 0.285            | 0.73 [0.09-5.96]           | 0.766   |
| <b>Placenta Praevia <sup>a</sup></b>                      |                        |                           |                          |                  |                            |         |
| No                                                        | 187 (99.47)            | 1,459 (99.39)             |                          |                  |                            |         |
| Yes                                                       | 1 (0.53)               | 9 (0.61)                  |                          |                  |                            |         |
| <b>Placental Abruption <sup>a</sup></b>                   |                        |                           |                          |                  |                            |         |
| No                                                        | 185 (98.40)            | 1,465 (99.8)              |                          |                  |                            |         |
| Yes                                                       | 3 (1.60)               | 3 (0.20)                  |                          |                  |                            |         |
| <b>Fetal Distress</b>                                     |                        |                           |                          |                  |                            |         |
| No                                                        | 162 (86.17)            | 1,356 (92.37)             | 1 [referent]             |                  | 1 [referent]               |         |
| Yes                                                       | 26 (13.83)             | 112 (7.63)                | <b>4.89 [1.20-19.90]</b> | <b>0.027</b>     | 2.57 [0.72-9.19]           | 0.145   |
| <b>Cephalopelvic Disproportion <sup>a</sup></b>           |                        |                           |                          |                  |                            |         |
| No                                                        | 188 (100.00)           | 1,464 (99.73)             |                          |                  |                            |         |
| Yes                                                       | 0 (0.00)               | 4 (0.27)                  |                          |                  |                            |         |
| <b>Prolapsed Cord <sup>a</sup></b>                        |                        |                           |                          |                  |                            |         |

|                                                         |              |               |                           |                  |                          |                  |
|---------------------------------------------------------|--------------|---------------|---------------------------|------------------|--------------------------|------------------|
| No                                                      | 188 (100.00) | 1,455 (99.11) |                           |                  |                          |                  |
| Yes                                                     | 0 (0.00)     | 13 (0.89)     |                           |                  |                          |                  |
| <b>Precipitate Delivery</b> <sup>a</sup>                |              |               |                           |                  |                          |                  |
| No                                                      | 186 (98.94)  | 1,444 (98.37) |                           |                  |                          |                  |
| Yes                                                     | 2 (1.06)     | 24 (1.63)     |                           |                  |                          |                  |
| <b>PPH ≥500mls</b>                                      |              |               |                           |                  |                          |                  |
| No                                                      | 124 (65.96)  | 1,075 (73.23) | 1 [referent]              |                  | 1 [referent]             |                  |
| Yes                                                     | 64 (34.04)   | 393 (26.77)   | 2.16 [0.90-5.18]          | 0.084            | 0.90 [0.36-2.25]         | 0.826            |
| <b>TSR ≥2mins</b>                                       |              |               |                           |                  |                          |                  |
| No                                                      | 152 (80.85)  | 1,272 (86.65) | 1 [referent]              |                  | 1 [referent]             |                  |
| Yes                                                     | 36 (19.15)   | 196 (13.35)   | 1.48 [0.64-3.44]          | 0.363            | 0.55 [0.19-1.55]         | 0.258            |
| <b>Apgar 5-minutes &lt;7</b> <sup>a</sup>               |              |               |                           |                  |                          |                  |
| No                                                      | 182 (96.81)  | 1,441 (98.16) |                           |                  |                          |                  |
| Yes                                                     | 6 (3.19)     | 27 (1.84)     |                           |                  |                          |                  |
| <b>Intubation</b>                                       |              |               |                           |                  |                          |                  |
| No                                                      | 147 (78.19)  | 1,242 (84.60) | 1 [referent]              |                  | 1 [referent]             |                  |
| Yes                                                     | 41 (21.81)   | 226 (15.40)   | <b>2.33 [1.03-5.28]</b>   | <b>0.043</b>     | 1.96 [0.75-5.10]         | 0.167            |
| <b>Early Preterm Birth</b>                              |              |               |                           |                  |                          |                  |
| No                                                      | 146 (77.66)  | 1,264 (86.1)  | 1 [referent]              |                  | 1 [referent]             |                  |
| Yes                                                     | 42 (22.34)   | 204 (13.9)    | <b>3.76 [1.21-11.68]</b>  | <b>0.022</b>     | 2.15 [0.76-6.11]         | 0.151            |
| <b>POBW &lt;15<sup>th</sup> Percentile</b>              |              |               |                           |                  |                          |                  |
| No                                                      | 125 (66.49)  | 1,106 (75.34) | 1 [referent]              |                  | 1 [referent]             |                  |
| Yes                                                     | 42 (22.34)   | 175 (11.92)   | <b>3.44 [1.53-7.74]</b>   | <b>0.003</b>     | <b>2.58 [1.15-5.77]</b>  | <b>0.022</b>     |
| Unavailable                                             | 21 (11.17)   | 187 (12.74)   |                           |                  |                          |                  |
| <b>Parity</b>                                           |              |               |                           |                  |                          |                  |
| 0                                                       | 67 (35.64)   | 595 (40.53)   | 1 [referent]              |                  | 1 [referent]             |                  |
| 1                                                       | 65 (34.57)   | 518 (35.29)   | 1.18 [0.48-2.86]          | 0.721            | 1.29 [0.41-4.08]         | 0.665            |
| ≥2                                                      | 56 (29.79)   | 355 (24.18)   | 1.81 [0.67-4.91]          | 0.244            | 1.53 [0.29-8.17]         | 0.617            |
|                                                         |              |               | Overall p-value           | 0.503            | Overall p-value          | 0.866            |
| <b>Child</b>                                            |              |               |                           |                  |                          |                  |
| <b>Sex</b>                                              |              |               |                           |                  |                          |                  |
| Female                                                  | 82 (43.62)   | 768 (52.32)   | 1 [referent]              |                  | 1 [referent]             |                  |
| Male                                                    | 106 (56.38)  | 700 (47.68)   | <b>2.50 [1.36-4.61]</b>   | <b>0.003</b>     | <b>3.31 [1.64-6.69]</b>  | <b>&lt;0.001</b> |
| <b>Ethnicity</b>                                        |              |               |                           |                  |                          |                  |
| Other                                                   | 167 (88.83)  | 1,405 (95.71) | 1 [referent]              |                  | 1 [referent]             |                  |
| Indigenous Australian                                   | 21 (11.17)   | 63 (4.29)     | <b>12.56 [2.12-74.52]</b> | <b>0.005</b>     | 0.80 [0.12-5.40]         | 0.816            |
| <b>Child Speaks Language Other Than English at Home</b> |              |               |                           |                  |                          |                  |
| No                                                      | 159 (84.57)  | 1,357 (92.44) | 1 [referent]              |                  | 1 [referent]             |                  |
| Yes                                                     | 29 (15.43)   | 111 (7.56)    | <b>4.62 [1.24-17.26]</b>  | <b>0.023</b>     | <b>4.84 [1.34-17.48]</b> | <b>0.016</b>     |
| <b>Age Category at Time of AEDC Completion</b>          |              |               |                           |                  |                          |                  |
| 1                                                       | 50 (26.60)   | 271 (18.46)   | <b>2.76 [1.02-7.46]</b>   | <b>&lt;0.001</b> | 2.22 [0.88-5.60]         | 0.092            |
| 2                                                       | 129 (68.62)  | 1,070 (72.89) | 1 [referent]              |                  | 1 [referent]             |                  |
| 3                                                       | 9 (4.79)     | 127 (8.65)    | 0.44 [0.10-1.93]          | 0.942            | 0.19 [0.03-1.18]         | 0.074            |
|                                                         |              |               | Overall p-value           | <b>0.049</b>     | Overall p-value          | <b>0.033</b>     |
| <b>Total Number of Siblings</b>                         |              |               |                           |                  |                          |                  |
| 1                                                       | 51 (27.13)   | 457 (31.13)   | 1 [referent]              |                  | 1 [referent]             |                  |
| 2                                                       | 69 (36.70)   | 585 (39.85)   | 1.10 [0.46-2.63]          | 0.827            | 0.98 [0.30-3.15]         | 0.970            |
| 3                                                       | 24 (12.77)   | 290 (19.75)   | 0.51 [0.16-1.57]          | 0.239            | 0.41 [0.08-2.10]         | 0.284            |
| >3                                                      | 44 (23.40)   | 136 (9.26)    | <b>8.32 [2.57-26.96]</b>  | <b>&lt;0.001</b> | 6.47 [0.98-42.75]        | 0.053            |
|                                                         |              |               | Overall p-value           | <b>&lt;0.001</b> | Overall p-value          | <b>0.008</b>     |
| <b>Sociodemographic</b>                                 |              |               |                           |                  |                          |                  |
| <b>Index of Relative Socioeconomic Disadvantage</b>     |              |               |                           |                  |                          |                  |
| Lowest Quintile                                         | 138 (73.40)  | 1,235 (84.13) | <b>3.78 [1.17-12.22]</b>  | <b>0.026</b>     | 1.85 [0.63-5.44]         | 0.264            |
| > Lowest Quintile                                       | 40 (21.28)   | 197 (13.42)   | 1 [referent]              |                  | 1 [referent]             |                  |
| Unavailable                                             | 10 (5.32)    | 36 (2.45)     |                           |                  |                          |                  |

<sup>a</sup> Excluded from multivariable analysis due to small N.

<sup>b</sup> Age categories classified as; 1) ≥3 years 10 months to <5 years and one month, 2) ≥5 years and one month to <5 years and 10 months (reference category), 3) ≥5 years and 10 months to <6 years 10 months.

Table 2. Risk Factors for Developmental Vulnerability on the Social Competence Domain.

| Characteristic                                            | DV<br>(N=151)<br>N (%) | NDV<br>(N=1,505)<br>N (%) | Bivariate                |                  | Multivariable<br>(N=1,352) |              |
|-----------------------------------------------------------|------------------------|---------------------------|--------------------------|------------------|----------------------------|--------------|
|                                                           |                        |                           | OR [95% CI]              | p-value          | aOR [95% CI]               | p-value      |
| <b>Maternal</b>                                           |                        |                           |                          |                  |                            |              |
| <b>Age at Time of Child's Birth (years)</b>               |                        |                           |                          |                  |                            |              |
| <25                                                       | 43 (28.48)             | 179 (11.89)               | <b>6.32 [1.91-20.95]</b> | <b>0.003</b>     | 3.13 [0.74-13.30]          | 0.122        |
| 25-29                                                     | 31 (20.53)             | 353 (23.46)               | 1 [referent]             |                  | 1 [referent]               |              |
| 30-34                                                     | 44 (29.14)             | 562 (37.34)               | 0.78 [0.29-2.15]         | 0.634            | 1.36 [0.43-4.36]           | 0.604        |
| ≥35                                                       | 33 (21.85)             | 411 (27.31)               | 0.81 [0.27-2.37]         | 0.696            | 0.99 [0.27-3.59]           | 0.982        |
|                                                           |                        |                           | Overall p-value          | <b>0.002</b>     | Overall p-value            | 0.431        |
| <b>Marital Status</b>                                     |                        |                           |                          |                  |                            |              |
| Married (inc. de facto)                                   | 113 (74.83)            | 1,367 (90.83)             | 1 [referent]             |                  | 1 [referent]               |              |
| All Other                                                 | 36 (23.84)             | 134 (8.90)                | <b>9.65 [3.20-29.05]</b> | <b>&lt;0.001</b> | <b>10.16 [2.56-40.41]</b>  | <b>0.001</b> |
| Unavailable                                               | 2 (1.32)               | 4 (0.27)                  |                          |                  |                            |              |
| <b>Occupational Status Scale at Time of Child's Birth</b> |                        |                           |                          |                  |                            |              |
| 0-20                                                      | 50 (33.11)             | 259 (17.21)               | <b>5.05 [2.07-12.29]</b> | <b>&lt;0.001</b> | 1.93 [0.64-5.79]           | 0.241        |
| >20-100                                                   | 94 (62.25)             | 1,191 (79.14)             | 1 [referent]             |                  | 1 [referent]               |              |
| Unavailable                                               | 7 (4.64)               | 55 (3.65)                 |                          |                  |                            |              |
| <b>Pregnancy &amp; Birth</b>                              |                        |                           |                          |                  |                            |              |
| <b>Fertility Treatments</b>                               |                        |                           |                          |                  |                            |              |
| No                                                        | 132 (87.42)            | 1,256 (83.46)             | 1 [referent]             |                  | 1 [referent]               |              |
| Yes                                                       | 19 (12.58)             | 249 (16.54)               | 0.54 [0.18-1.60]         | 0.269            | 1.38 [0.37-5.17]           | 0.635        |
| <b>Smoking Status During Pregnancy</b>                    |                        |                           |                          |                  |                            |              |
| No                                                        | 116 (76.82)            | 1,302 (86.51)             | 1 [referent]             |                  | 1 [referent]               |              |
| Yes                                                       | 35 (23.18)             | 203 (13.49)               | <b>3.70 [1.06-12.91]</b> | <b>0.041</b>     | 1.22 [0.35-4.20]           | 0.753        |
| <b>Pre-eclampsia</b>                                      |                        |                           |                          |                  |                            |              |
| No                                                        | 134 (88.74)            | 1,326 (88.11)             | 1 [referent]             |                  | 1 [referent]               |              |
| Yes                                                       | 17 (11.26)             | 179 (11.89)               | 0.98 [0.31-3.14]         | 0.975            | 1.84 [0.49-6.84]           | 0.365        |
| <b>Gestational Diabetes</b>                               |                        |                           |                          |                  |                            |              |
| No                                                        | 140 (92.72)            | 1,414 (93.95)             | 1 [referent]             |                  | 1 [referent]               |              |
| Yes                                                       | 11 (7.28)              | 91 (6.05)                 | 1.46 [0.32-6.60]         | 0.627            | 2.11 [0.41-10.74]          | 0.369        |
| <b>Threatened Abortion</b>                                |                        |                           |                          |                  |                            |              |
| No                                                        | 144 (95.36)            | 1,428 (94.88)             | 1 [referent]             |                  | 1 [referent]               |              |
| Yes                                                       | 7 (4.64)               | 77 (5.12)                 | 0.66 [0.11-4.10]         | 0.658            | 0.13 [0.01-2.43]           | 0.171        |
| <b>Other Pregnancy Related Complications</b>              |                        |                           |                          |                  |                            |              |
| No                                                        | 38 (25.17)             | 538 (35.75)               | 1 [referent]             |                  | 1 [referent]               |              |
| Yes                                                       | 113 (74.83)            | 967 (64.25)               | 2.15 [0.89-5.19]         | 0.088            | 2.00 [0.70-5.74]           | 0.196        |
| <b>Threatened Preterm Labour</b>                          |                        |                           |                          |                  |                            |              |
| No                                                        | 131 (86.75)            | 1,333 (88.57)             | 1 [referent]             |                  | 1 [referent]               |              |
| Yes                                                       | 20 (13.25)             | 172 (11.43)               | 1.32 [0.42-4.17]         | 0.640            | 0.69 [0.19-2.59]           | 0.584        |
| <b>APH</b>                                                |                        |                           |                          |                  |                            |              |
| No                                                        | 142 (94.04)            | 1,456 (96.74)             | 1 [referent]             |                  | 1 [referent]               |              |
| Yes                                                       | 9 (5.96)               | 49 (3.26)                 | 3.74 [0.62-22.66]        | 0.151            | 2.12 [0.27-16.50]          | 0.473        |
| <b>Placenta Praevia <sup>a</sup></b>                      |                        |                           |                          |                  |                            |              |
| No                                                        | 151 (100.00)           | 1,495 (99.34)             |                          |                  |                            |              |
| Yes                                                       | 0 (0.00)               | 10 (0.66)                 |                          |                  |                            |              |
| <b>Placental Abruption <sup>a</sup></b>                   |                        |                           |                          |                  |                            |              |
| No                                                        | 149 (98.68)            | 1,501 (99.73)             |                          |                  |                            |              |
| Yes                                                       | 2 (1.32)               | 4 (0.27)                  |                          |                  |                            |              |
| <b>Fetal Distress</b>                                     |                        |                           |                          |                  |                            |              |
| No                                                        | 132 (87.42)            | 1,386 (92.09)             | 1 [referent]             |                  | 1 [referent]               |              |
| Yes                                                       | 19 (12.58)             | 119 (7.91)                | 2.77 [0.81-9.50]         | 0.105            | 1.39 [0.33-5.82]           | 0.656        |
| <b>Cephalopelvic Disproportion <sup>a</sup></b>           |                        |                           |                          |                  |                            |              |
| No                                                        | 151 (100.00)           | 1,501 (99.73)             |                          |                  |                            |              |
| Yes                                                       | 0 (0.00)               | 4 (0.27)                  |                          |                  |                            |              |
| <b>Prolapsed Cord <sup>a</sup></b>                        |                        |                           |                          |                  |                            |              |
| No                                                        | 148 (98.01)            | 1,495 (99.34)             |                          |                  |                            |              |

|                                                             |             |               |                          |                  |                          |                  |
|-------------------------------------------------------------|-------------|---------------|--------------------------|------------------|--------------------------|------------------|
| Yes                                                         | 3 (1.99)    | 10 (0.66)     |                          |                  |                          |                  |
| <b>Precipitate Delivery</b> <sup>a</sup>                    |             |               |                          |                  |                          |                  |
| No                                                          | 149 (98.68) | 1,481 (98.41) |                          |                  |                          |                  |
| Yes                                                         | 2 (1.32)    | 24 (1.59)     |                          |                  |                          |                  |
| <b>PPH ≥500mls</b>                                          |             |               |                          |                  |                          |                  |
| No                                                          | 96 (63.58)  | 1,103 (73.29) | 1 [referent]             |                  | 1 [referent]             |                  |
| Yes                                                         | 55 (36.42)  | 402 (26.71)   | <b>2.61 [1.14-5.97]</b>  | <b>0.023</b>     | 1.42 [0.54-3.76]         | 0.477            |
| <b>TSR ≥2mins</b>                                           |             |               |                          |                  |                          |                  |
| No                                                          | 119 (78.81) | 1,305 (86.71) | 1 [referent]             |                  | 1 [referent]             |                  |
| Yes                                                         | 32 (21.19)  | 200 (13.29)   | 1.76 [0.80-3.89]         | 0.161            | 0.80 [0.26-2.46]         | 0.697            |
| <b>Apgar 5-minutes &lt;7</b> <sup>a</sup>                   |             |               |                          |                  |                          |                  |
| No                                                          | 147 (97.35) | 1,476 (98.07) |                          |                  |                          |                  |
| Yes                                                         | 4 (2.65)    | 29 (1.93)     |                          |                  |                          |                  |
| <b>Intubation</b>                                           |             |               |                          |                  |                          |                  |
| No                                                          | 112 (74.17) | 1,277 (84.85) | 1 [referent]             |                  | 1 [referent]             |                  |
| Yes                                                         | 39 (25.83)  | 228 (15.15)   | 2.31 [1.00-5.33]         | 0.051            | 2.48 [0.86-7.20]         | 0.093            |
| <b>Early Preterm Birth</b>                                  |             |               |                          |                  |                          |                  |
| No                                                          | 123 (81.46) | 1,287 (85.51) | 1 [referent]             |                  | 1 [referent]             |                  |
| Yes                                                         | 28 (18.54)  | 218 (14.49)   | 1.64 [0.59-4.57]         | 0.345            | 0.68 [0.20-2.27]         | 0.525            |
| <b>POBW &lt;15<sup>th</sup> Percentile</b>                  |             |               |                          |                  |                          |                  |
| No                                                          | 114 (75.5)  | 1,117 (74.22) | 1 [referent]             |                  | 1 [referent]             |                  |
| Yes                                                         | 23 (15.23)  | 194 (12.89)   | 1.51 [0.65-3.54]         | 0.341            | 1.65 [0.63-4.30]         | 0.304            |
| Unavailable                                                 | 14 (9.27)   | 194 (12.89)   |                          |                  |                          |                  |
| <b>Parity</b>                                               |             |               |                          |                  |                          |                  |
| 0                                                           | 58 (38.41)  | 604 (40.13)   | 1 [referent]             |                  | 1 [referent]             |                  |
| 1                                                           | 49 (32.45)  | 534 (35.48)   | 1.06 [0.44-2.56]         | 0.906            | 0.87 [0.25-3.08]         | 0.827            |
| ≥2                                                          | 44 (29.14)  | 367 (24.39)   | 1.73 [0.67-4.50]         | 0.259            | 2.02 [0.35-11.63]        | 0.432            |
|                                                             |             |               | Overall p-value          | 0.481            | Overall p-value          | 0.554            |
| <b>Child</b>                                                |             |               |                          |                  |                          |                  |
| <b>Sex</b>                                                  |             |               |                          |                  |                          |                  |
| Female                                                      | 51 (33.77)  | 799 (53.09)   | 1 [referent]             |                  | 1 [referent]             |                  |
| Male                                                        | 100 (66.23) | 706 (46.91)   | <b>5.21 [2.58-10.52]</b> | <b>&lt;0.001</b> | <b>5.35 [2.38-12.00]</b> | <b>&lt;0.001</b> |
| <b>Ethnicity</b>                                            |             |               |                          |                  |                          |                  |
| Other                                                       | 137 (90.73) | 1,435 (95.35) | 1 [referent]             |                  | 1 [referent]             |                  |
| Indigenous Australian                                       | 14 (9.27)   | 70 (4.65)     | 3.96 [0.86-18.29]        | 0.078            | 2.43 [0.36-16.63]        | 0.364            |
| <b>Child Speaks Language Other Than English at Home</b>     |             |               |                          |                  |                          |                  |
| No                                                          | 139 (92.05) | 1,377 (91.50) | 1 [referent]             |                  | 1 [referent]             |                  |
| Yes                                                         | 12 (7.95)   | 128 (8.50)    | 0.67 [0.17-2.62]         | 0.567            | 1.13 [0.24-5.18]         | 0.880            |
| <b>Age Category at Time of AEDC Completion</b> <sup>b</sup> |             |               |                          |                  |                          |                  |
| 1                                                           | 40 (26.49)  | 281 (18.67)   | 2.42 [0.98-5.94]         | 0.055            | <b>2.84 [1.05-7.73]</b>  | <b>0.041</b>     |
| 2                                                           | 98 (64.9)   | 1,101 (73.16) | 1 [referent]             |                  | 1 [referent]             |                  |
| 3                                                           | 13 (8.61)   | 123 (8.17)    | 1.73 [0.46-6.48]         | 0.417            | 0.51 [0.09-2.75]         | 0.431            |
|                                                             |             |               | Overall p-value          | 0.145            | Overall p-value          | 0.065            |
| <b>Total Number of Siblings</b>                             |             |               |                          |                  |                          |                  |
| 1                                                           | 41 (27.15)  | 467 (31.03)   | 1 [referent]             |                  | 1 [referent]             |                  |
| 2                                                           | 57 (37.75)  | 597 (39.67)   | 1.27 [0.50-3.23]         | 0.613            | 1.97 [0.52-7.49]         | 0.322            |
| 3                                                           | 27 (17.88)  | 287 (19.07)   | 1.27 [0.41-3.91]         | 0.678            | 0.91 [0.16-5.21]         | 0.915            |
| >3                                                          | 26 (17.22)  | 154 (10.23)   | <b>4.06 [1.14-14.39]</b> | <b>0.030</b>     | 2.53 [0.33-19.66]        | 0.374            |
|                                                             |             |               | Overall p-value          | 0.172            | Overall p-value          | 0.417            |
| <b>Sociodemographic</b>                                     |             |               |                          |                  |                          |                  |
| <b>Index of Relative Socioeconomic Disadvantage</b>         |             |               |                          |                  |                          |                  |
| Lowest Quintile                                             | 118 (78.15) | 1,255 (83.39) | 1.67 [0.59-4.74]         | 0.336            | 0.72 [0.21-2.45]         | 0.596            |
| > Lowest Quintile                                           | 26 (17.22)  | 211 (14.02)   | 1 [referent]             |                  | 1 [referent]             |                  |
| Unavailable                                                 | 7 (4.64)    | 39 (2.59)     |                          |                  |                          |                  |

<sup>a</sup> Excluded from multivariable analysis due to small N.

<sup>b</sup> Age categories classified as; 1) ≥3 years 10 months to <5 years and one month, 2) ≥5 years and one month to <5 years and 10 months (reference category), 3) ≥5 years and 10 months to <6 years 10 months.

Table 3. Risk Factors for Developmental Vulnerability on the Emotional Maturity Domain.

| Characteristic                                            | DV<br>(N=147)<br>N (%) | NDV<br>(N=1,509)<br>N (%) | Bivariate               |                  | Multivariable<br>(N=1,352) |              |
|-----------------------------------------------------------|------------------------|---------------------------|-------------------------|------------------|----------------------------|--------------|
|                                                           |                        |                           | OR [95% CI]             | p-value          | aOR [95% CI]               | p-value      |
| <b>Maternal</b>                                           |                        |                           |                         |                  |                            |              |
| <b>Age at Time of Child's Birth (years)</b>               |                        |                           |                         |                  |                            |              |
| <25                                                       | 39 (26.53)             | 183 (12.13)               | <b>3.14 [1.44-6.89]</b> | <b>0.004</b>     | 1.89 [0.70-5.05]           | 0.206        |
| 25-29                                                     | 31 (21.09)             | 353 (23.39)               | 1 [referent]            |                  | 1 [referent]               |              |
| 30-34                                                     | 38 (25.85)             | 568 (37.64)               | 0.70 [0.35-1.40]        | 0.311            | 1.03 [0.46-2.34]           | 0.937        |
| ≥35                                                       | 39 (26.53)             | 405 (26.84)               | 1.12 [0.55-2.27]        | 0.762            | 1.16 [0.48-2.81]           | 0.742        |
|                                                           |                        |                           | Overall p-value         | <b>0.001</b>     | Overall p-value            | 0.611        |
| <b>Marital Status</b>                                     |                        |                           |                         |                  |                            |              |
| Married (inc. de facto)                                   | 111 (75.51)            | 1,369 (90.72)             | 1 [referent]            |                  | 1 [referent]               |              |
| All Other                                                 | 34 (23.13)             | 136 (9.01)                | <b>4.58 [2.26-9.27]</b> | <b>&lt;0.001</b> | <b>3.77 [1.48-9.58]</b>    | <b>0.006</b> |
| Unavailable                                               | 2 (1.36)               | 4 (0.27)                  |                         |                  |                            |              |
| <b>Occupational Status Scale at Time of Child's Birth</b> |                        |                           |                         |                  |                            |              |
| 0-20                                                      | 45 (30.61)             | 264 (17.50)               | <b>2.62 [1.46-4.72]</b> | <b>0.001</b>     | 1.85 [0.86-3.97]           | 0.113        |
| >20-100                                                   | 95 (64.63)             | 1,190 (78.86)             | 1 [referent]            |                  | 1 [referent]               |              |
| Unavailable                                               | 7 (4.76)               | 55 (3.64)                 |                         |                  |                            |              |
| <b>Pregnancy &amp; Birth</b>                              |                        |                           |                         |                  |                            |              |
| <b>Fertility Treatments</b>                               |                        |                           |                         |                  |                            |              |
| No                                                        | 126 (85.71)            | 1,262 (83.63)             | 1 [referent]            |                  | 1 [referent]               |              |
| Yes                                                       | 21 (14.29)             | 247 (16.37)               | 0.81 [0.40-1.66]        | 0.567            | 1.03 [0.42-2.53]           | 0.957        |
| <b>Smoking Status During Pregnancy</b>                    |                        |                           |                         |                  |                            |              |
| No                                                        | 118 (80.27)            | 1,300 (86.15)             | 1 [referent]            |                  | 1 [referent]               |              |
| Yes                                                       | 29 (19.73)             | 209 (13.85)               | 1.70 [0.86-3.36]        | 0.130            | 0.82 [0.33-2.02]           | 0.662        |
| <b>Pre-eclampsia</b>                                      |                        |                           |                         |                  |                            |              |
| No                                                        | 129 (87.76)            | 1,331 (88.20)             | 1 [referent]            |                  | 1 [referent]               |              |
| Yes                                                       | 18 (12.24)             | 178 (11.80)               | 1.09 [0.50-2.40]        | 0.827            | 1.87 [0.75-4.63]           | 0.176        |
| <b>Gestational Diabetes</b>                               |                        |                           |                         |                  |                            |              |
| No                                                        | 138 (93.88)            | 1,416 (93.84)             | 1 [referent]            |                  | 1 [referent]               |              |
| Yes                                                       | 9 (6.12)               | 93 (6.16)                 | 1.02 [0.35-2.97]        | 0.975            | 1.18 [0.37-3.76]           | 0.785        |
| <b>Threatened Abortion</b>                                |                        |                           |                         |                  |                            |              |
| No                                                        | 140 (95.24)            | 1,432 (94.90)             | 1 [referent]            |                  | 1 [referent]               |              |
| Yes                                                       | 7 (4.76)               | 77 (5.10)                 | 0.91 [0.28-3.03]        | 0.882            | 0.09 [0.01-1.06]           | 0.055        |
| <b>Other Pregnancy Related Complications</b>              |                        |                           |                         |                  |                            |              |
| No                                                        | 35 (23.81)             | 541 (35.85)               | 1 [referent]            |                  | 1 [referent]               |              |
| Yes                                                       | 112 (76.19)            | 968 (64.15)               | <b>2.13 [1.20-3.80]</b> | <b>0.010</b>     | 1.80 [0.86-3.78]           | 0.121        |
| <b>Threatened Preterm Labour</b>                          |                        |                           |                         |                  |                            |              |
| No                                                        | 125 (85.03)            | 1,339 (88.73)             | 1 [referent]            |                  | 1 [referent]               |              |
| Yes                                                       | 22 (14.97)             | 170 (11.27)               | 1.52 [0.72-3.25]        | 0.274            | 1.21 [0.51-2.85]           | 0.664        |
| <b>APH</b>                                                |                        |                           |                         |                  |                            |              |
| No                                                        | 139 (94.56)            | 1,459 (96.69)             | 1 [referent]            |                  | 1 [referent]               |              |
| Yes                                                       | 8 (5.44)               | 50 (3.31)                 | 2.13 [0.62-7.31]        | 0.230            | 0.67 [0.13-3.31]           | 0.618        |
| <b>Placenta Praevia<sup>a</sup></b>                       |                        |                           |                         |                  |                            |              |
| No                                                        | 146 (99.32)            | 1,500 (99.40)             |                         |                  |                            |              |
| Yes                                                       | 1 (0.68)               | 9 (0.60)                  |                         |                  |                            |              |
| <b>Placental Abruption<sup>a</sup></b>                    |                        |                           |                         |                  |                            |              |
| No                                                        | 145 (98.64)            | 1,505 (99.73)             |                         |                  |                            |              |
| Yes                                                       | 2 (1.36)               | 4 (0.27)                  |                         |                  |                            |              |
| <b>Fetal Distress</b>                                     |                        |                           |                         |                  |                            |              |
| No                                                        | 128 (87.07)            | 1,390 (92.11)             | 1 [referent]            |                  | 1 [referent]               |              |
| Yes                                                       | 19 (12.93)             | 119 (7.89)                | 1.95 [0.86-4.44]        | 0.111            | 1.09 [0.40-2.93]           | 0.869        |
| <b>Cephalopelvic Disproportion<sup>a</sup></b>            |                        |                           |                         |                  |                            |              |
| No                                                        | 147 (100.00)           | 1,505 (99.73)             |                         |                  |                            |              |
| Yes                                                       | 0 (0.00)               | 4 (0.27)                  |                         |                  |                            |              |
| <b>Prolapsed Cord<sup>a</sup></b>                         |                        |                           |                         |                  |                            |              |
| No                                                        | 145 (98.64)            | 1,498 (99.27)             |                         |                  |                            |              |



|                                                             |             |               |                           |                  |                          |                  |
|-------------------------------------------------------------|-------------|---------------|---------------------------|------------------|--------------------------|------------------|
| Yes                                                         | 2 (1.36)    | 11 (0.73)     |                           |                  |                          |                  |
| <b>Precipitate Delivery</b> <sup>a</sup>                    |             |               |                           |                  |                          |                  |
| No                                                          | 146 (99.32) | 1,484 (98.34) |                           |                  |                          |                  |
| Yes                                                         | 1 (0.68)    | 25 (1.66)     |                           |                  |                          |                  |
| <b>PPH ≥500mls</b>                                          |             |               |                           |                  |                          |                  |
| No                                                          | 95 (64.63)  | 1,104 (73.16) | 1 [referent]              |                  | 1 [referent]             |                  |
| Yes                                                         | 52 (35.37)  | 405 (26.84)   | <b>1.75 [1.01-3.05]</b>   | <b>0.047</b>     | 1.03 [0.52-2.03]         | 0.932            |
| <b>TSR ≥2mins</b>                                           |             |               |                           |                  |                          |                  |
| No                                                          | 119 (80.95) | 1,305 (86.48) | 1 [referent]              |                  | 1 [referent]             |                  |
| Yes                                                         | 28 (19.05)  | 204 (13.52)   | 1.69 [0.91-3.15]          | 0.096            | 1.12 [0.45-2.74]         | 0.812            |
| <b>Apgar 5-minutes &lt;7</b> <sup>a</sup>                   |             |               |                           |                  |                          |                  |
| No                                                          | 143 (97.28) | 1,480 (98.08) |                           |                  |                          |                  |
| Yes                                                         | 4 (2.72)    | 29 (1.92)     |                           |                  |                          |                  |
| <b>Intubation</b>                                           |             |               |                           |                  |                          |                  |
| No                                                          | 114 (77.55) | 1,275 (84.49) | 1 [referent]              |                  | 1 [referent]             |                  |
| Yes                                                         | 33 (22.45)  | 234 (15.51)   | 1.78 [0.98-3.21]          | 0.057            | 1.48 [0.63-3.49]         | 0.366            |
| <b>Early Preterm Birth</b>                                  |             |               |                           |                  |                          |                  |
| No                                                          | 119 (80.95) | 1,291 (85.55) | 1 [referent]              |                  | 1 [referent]             |                  |
| Yes                                                         | 28 (19.05)  | 218 (14.45)   | 1.51 [0.76-3.00]          | 0.237            | 0.95 [0.42-2.13]         | 0.897            |
| <b>POBW &lt;15<sup>th</sup> Percentile</b>                  |             |               |                           |                  |                          |                  |
| No                                                          | 106 (72.11) | 1,125 (74.55) | 1 [referent]              |                  | 1 [referent]             |                  |
| Yes                                                         | 24 (16.33)  | 193 (12.79)   | 1.48 [0.76-2.87]          | 0.252            | 1.59 [0.77-3.30]         | 0.210            |
| Unavailable                                                 | 17 (11.56)  | 191 (12.66)   |                           |                  |                          |                  |
| <b>Parity</b>                                               |             |               |                           |                  |                          |                  |
| 0                                                           | 61 (41.5)   | 601 (39.83)   | 1 [referent]              |                  | 1 [referent]             |                  |
| 1                                                           | 52 (35.37)  | 531 (35.19)   | 0.99 [0.55-1.78]          | 0.968            | 0.86 [0.36-2.03]         | 0.723            |
| ≥2                                                          | 34 (23.13)  | 377 (24.98)   | 0.89 [0.46-1.72]          | 0.727            | 0.84 [0.24-2.95]         | 0.786            |
|                                                             |             |               | Overall p-value           | 0.934            | Overall p-value          | 0.935            |
| <b>Child</b>                                                |             |               |                           |                  |                          |                  |
| <b>Sex</b>                                                  |             |               |                           |                  |                          |                  |
| Female                                                      | 32 (21.77)  | 818 (54.21)   | 1 [referent]              |                  | 1 [referent]             |                  |
| Male                                                        | 115 (78.23) | 691 (45.79)   | <b>10.13 [4.94-20.79]</b> | <b>&lt;0.001</b> | <b>9.37 [4.42-19.87]</b> | <b>&lt;0.001</b> |
| <b>Ethnicity</b>                                            |             |               |                           |                  |                          |                  |
| Other                                                       | 131 (89.12) | 1,441 (95.49) | 1 [referent]              |                  | 1 [referent]             |                  |
| Indigenous Australian                                       | 16 (10.88)  | 68 (4.51)     | <b>3.62 [1.36-9.62]</b>   | <b>0.010</b>     | <b>5.61 [1.48-21.31]</b> | <b>0.012</b>     |
| <b>Child Speaks Language Other Than English at Home</b>     |             |               |                           |                  |                          |                  |
| No                                                          | 135 (91.84) | 1,381 (91.52) | 1 [referent]              |                  | 1 [referent]             |                  |
| Yes                                                         | 12 (8.16)   | 128 (8.48)    | 1.00 [0.40-2.49]          | 0.994            | 1.02 [0.34-3.04]         | 0.975            |
| <b>Age Category at Time of AEDC Completion</b> <sup>b</sup> |             |               |                           |                  |                          |                  |
| 1                                                           | 37 (25.17)  | 284 (18.82)   | 1.57 [0.85-2.90]          | 0.148            | 1.38 [0.68-2.80]         | 0.377            |
| 2                                                           | 102 (69.39) | 1,097 (72.7)  | 1 [referent]              |                  | 1 [referent]             |                  |
| 3                                                           | 8 (5.44)    | 128 (8.48)    | 0.62 [0.22-1.77]          | 0.372            | 0.31 [0.08-1.17]         | 0.085            |
|                                                             |             |               | Overall p-value           | 0.187            | Overall p-value          | 0.122            |
| <b>Total Number of Siblings</b>                             |             |               |                           |                  |                          |                  |
| 1                                                           | 45 (30.61)  | 463 (30.68)   | 1 [referent]              |                  | 1 [referent]             |                  |
| 2                                                           | 59 (40.14)  | 595 (39.43)   | 1.05 [0.57-1.95]          | 0.873            | 1.72 [0.69-4.25]         | 0.241            |
| 3                                                           | 22 (14.97)  | 292 (19.35)   | 0.71 [0.32-1.57]          | 0.400            | 0.95 [0.28-3.24]         | 0.935            |
| >3                                                          | 21 (14.29)  | 159 (10.54)   | 1.62 [0.69-3.80]          | 0.270            | 1.93 [0.46-8.19]         | 0.370            |
|                                                             |             |               | Overall p-value           | 0.423            | Overall p-value          | 0.356            |
| <b>Sociodemographic</b>                                     |             |               |                           |                  |                          |                  |
| <b>Index of Relative Socioeconomic Disadvantage</b>         |             |               |                           |                  |                          |                  |
| Lowest Quintile                                             | 118 (80.27) | 1,255 (83.17) | 1.08 [0.54-2.17]          | 0.835            | 0.58 [0.24-1.43]         | 0.238            |
| > Lowest Quintile                                           | 22 (14.97)  | 215 (14.25)   | 1 [referent]              |                  | 1 [referent]             |                  |
| Unavailable                                                 | 7 (4.76)    | 39 (2.58)     |                           |                  |                          |                  |

<sup>a</sup> Excluded from multivariable analysis due to small N.

<sup>b</sup> Age categories classified as; 1) ≥3 years 10 months to <5 years and one month, 2) ≥5 years and one month to <5 years and 10 months (reference category), 3) ≥5 years and 10 months to <6 years 10 months.



Table 4. Risk Factors for Developmental Vulnerability on the Language &amp; Cognitive Skills (school-based) Domain.

| Characteristic                                            | DV<br>(N=195)<br>N (%) | NDV<br>(N=1,461)<br>N (%) | Bivariate                 |                  | Multivariable<br>(N=1,352) |              |
|-----------------------------------------------------------|------------------------|---------------------------|---------------------------|------------------|----------------------------|--------------|
|                                                           |                        |                           | OR [95% CI]               | p-value          | aOR [95% CI]               | p-value      |
| <b>Maternal</b>                                           |                        |                           |                           |                  |                            |              |
| <b>Age at Time of Child's Birth (years)</b>               |                        |                           |                           |                  |                            |              |
| <25                                                       | 68 (34.87)             | 154 (10.54)               | <b>18.41 [5.21-65.05]</b> | <b>&lt;0.001</b> | <b>12.90 [2.81-59.16]</b>  | <b>0.001</b> |
| 25-29                                                     | 38 (19.49)             | 346 (23.68)               | 1 [referent]              |                  | 1 [referent]               |              |
| 30-34                                                     | 52 (26.67)             | 554 (37.92)               | 0.72 [0.25-2.02]          | 0.528            | 0.80 [0.24-2.67]           | 0.716        |
| ≥35                                                       | 37 (18.97)             | 407 (27.86)               | 0.70 [0.23-2.13]          | 0.528            | 0.98 [0.27-3.57]           | 0.970        |
|                                                           |                        |                           | Overall p-value           | <b>&lt;0.001</b> | Overall p-value            | <b>0.003</b> |
| <b>Marital Status</b>                                     |                        |                           |                           |                  |                            |              |
| Married (inc. de facto)                                   | 145 (74.36)            | 1,335 (91.38)             | 1 [referent]              |                  | 1 [referent]               |              |
| All Other                                                 | 50 (25.64)             | 120 (8.21)                | <b>18.44 [5.70-59.63]</b> | <b>&lt;0.001</b> | <b>5.92 [1.43-24.59]</b>   | <b>0.014</b> |
| Unavailable                                               | 0 (0.00)               | 6 (0.41)                  |                           |                  |                            |              |
| <b>Occupational Status Scale at Time of Child's Birth</b> |                        |                           |                           |                  |                            |              |
| 0-20                                                      | 70 (35.90)             | 239 (16.36)               | <b>12.68 [4.58-35.09]</b> | <b>&lt;0.001</b> | <b>3.61 [1.19-10.95]</b>   | <b>0.024</b> |
| >80-100                                                   | 105 (53.85)            | 1,180 (80.77)             | 1 [referent]              |                  | 1 [referent]               |              |
| Unavailable                                               | 20 (10.26)             | 42 (2.87)                 |                           |                  |                            |              |
| <b>Pregnancy &amp; Birth</b>                              |                        |                           |                           |                  |                            |              |
| <b>Fertility Treatments</b>                               |                        |                           |                           |                  |                            |              |
| No                                                        | 180 (92.31)            | 1,208 (82.68)             | 1 [referent]              |                  | 1 [referent]               |              |
| Yes                                                       | 15 (7.69)              | 253 (17.32)               | 0.16 [0.04-0.55]          | 0.004            | 0.42 [0.09-1.95]           | 0.264        |
| <b>Smoking Status During Pregnancy</b>                    |                        |                           |                           |                  |                            |              |
| No                                                        | 145 (74.36)            | 1,273 (87.13)             | 1 [referent]              |                  | 1 [referent]               |              |
| Yes                                                       | 50 (25.64)             | 188 (12.87)               | <b>6.35 [2.24-18.01]</b>  | <b>&lt;0.001</b> | 0.28 [0.07-1.09]           | 0.066        |
| <b>Pre-eclampsia</b>                                      |                        |                           |                           |                  |                            |              |
| No                                                        | 176 (90.26)            | 1,284 (87.89)             | 1 [referent]              |                  | 1 [referent]               |              |
| Yes                                                       | 19 (9.74)              | 177 (12.11)               | 0.61 [0.18-2.10]          | 0.434            | 1.09 [0.26-4.60]           | 0.908        |
| <b>Gestational Diabetes</b>                               |                        |                           |                           |                  |                            |              |
| No                                                        | 184 (94.36)            | 1,370 (93.77)             | 1 [referent]              |                  | 1 [referent]               |              |
| Yes                                                       | 11 (5.64)              | 91 (6.23)                 | 0.84 [0.16-4.44]          | 0.836            | 0.66 [0.11-4.01]           | 0.651        |
| <b>Threatened Abortion</b>                                |                        |                           |                           |                  |                            |              |
| No                                                        | 189 (96.92)            | 1,383 (94.66)             | 1 [referent]              |                  | 1 [referent]               |              |
| Yes                                                       | 6 (3.08)               | 78 (5.34)                 | 0.36 [0.05-2.41]          | 0.291            | 0.20 [0.01-3.32]           | 0.258        |
| <b>Other Pregnancy Related Complications</b>              |                        |                           |                           |                  |                            |              |
| No                                                        | 53 (27.18)             | 523 (35.80)               | 1 [referent]              |                  | 1 [referent]               |              |
| Yes                                                       | 142 (72.82)            | 938 (64.20)               | 1.96 [0.84-4.54]          | 0.119            | 1.29 [0.45-3.71]           | 0.635        |
| <b>Threatened Preterm Labour</b>                          |                        |                           |                           |                  |                            |              |
| No                                                        | 162 (83.08)            | 1,302 (89.12)             | 1 [referent]              |                  | 1 [referent]               |              |
| Yes                                                       | 33 (16.92)             | 159 (10.88)               | 3.21 [0.80-12.92]         | 0.100            | 1.20 [0.32-4.48]           | 0.782        |
| <b>APH</b>                                                |                        |                           |                           |                  |                            |              |
| No                                                        | 183 (93.85)            | 1,415 (96.85)             | 1 [referent]              |                  | 1 [referent]               |              |
| Yes                                                       | 12 (6.15)              | 46 (3.15)                 | 6.80 [0.62-74.13]         | 0.116            | 4.92 [0.62-39.01]          | 0.131        |
| <b>Placenta Praevia</b>                                   |                        |                           |                           |                  |                            |              |
| No                                                        | 195 (100.00)           | 1,451 (99.32)             |                           |                  |                            |              |
| Yes                                                       | 0 (0.00)               | 10 (0.68)                 |                           |                  |                            |              |
| <b>Placental Abruption</b>                                |                        |                           |                           |                  |                            |              |
| No                                                        | 195 (100.00)           | 1,455 (99.59)             |                           |                  |                            |              |
| Yes                                                       | 0 (0.00)               | 6 (0.41)                  |                           |                  |                            |              |
| <b>Fetal Distress</b>                                     |                        |                           |                           |                  |                            |              |
| No                                                        | 173 (88.72)            | 1,345 (92.06)             | 1 [referent]              |                  | 1 [referent]               |              |
| Yes                                                       | 22 (11.28)             | 116 (7.94)                | 2.04 [0.45-9.17]          | 0.353            | 0.56 [0.11-2.76]           | 0.475        |
| <b>Cephalopelvic Disproportion<sup>a</sup></b>            |                        |                           |                           |                  |                            |              |
| No                                                        | 195 (100.00)           | 1,457 (99.73)             |                           |                  |                            |              |
| Yes                                                       | 0 (0.00)               | 4 (0.27)                  |                           |                  |                            |              |
| <b>Prolapsed Cord<sup>a</sup></b>                         |                        |                           |                           |                  |                            |              |

|                                                             |             |               |                            |                  |                          |              |
|-------------------------------------------------------------|-------------|---------------|----------------------------|------------------|--------------------------|--------------|
| No                                                          | 192 (98.46) | 1,451 (99.32) |                            |                  |                          |              |
| Yes                                                         | 3 (1.54)    | 10 (0.68)     |                            |                  |                          |              |
| <b>Precipitate Delivery</b> <sup>a</sup>                    |             |               |                            |                  |                          |              |
| No                                                          | 190 (97.44) | 1,440 (98.56) |                            |                  |                          |              |
| Yes                                                         | 5 (2.56)    | 21 (1.44)     |                            |                  |                          |              |
| <b>PPH ≥500mls</b>                                          |             |               |                            |                  |                          |              |
| No                                                          | 123 (63.08) | 1,076 (73.65) | 1 [referent]               |                  | 1 [referent]             |              |
| Yes                                                         | 72 (36.92)  | 385 (26.35)   | <b>3.13 [1.22-8.05]</b>    | <b>0.018</b>     | 1.84 [0.67-5.03]         | 0.237        |
| <b>TSR ≥2mins</b>                                           |             |               |                            |                  |                          |              |
| No                                                          | 163 (83.59) | 1,261 (86.31) | 1 [referent]               |                  | 1 [referent]             |              |
| Yes                                                         | 32 (16.41)  | 200 (13.69)   | 0.95 [0.39-2.30]           | 0.908            | 0.62 [0.20-1.91]         | 0.399        |
| <b>Apgar 5-minutes &lt;7</b> <sup>a</sup>                   |             |               |                            |                  |                          |              |
| No                                                          | 193 (98.97) | 1,430 (97.88) |                            |                  |                          |              |
| Yes                                                         | 2 (1.03)    | 31 (2.12)     |                            |                  |                          |              |
| <b>Intubation</b>                                           |             |               |                            |                  |                          |              |
| No                                                          | 159 (81.54) | 1,230 (84.19) | 1 [referent]               |                  | 1 [referent]             |              |
| Yes                                                         | 36 (18.46)  | 231 (15.81)   | 1.13 [0.49-2.58]           | 0.779            | 1.68 [0.59-4.81]         | 0.333        |
| <b>Early Preterm Birth</b>                                  |             |               |                            |                  |                          |              |
| No                                                          | 155 (79.49) | 1,255 (85.90) | 1 [referent]               |                  | 1 [referent]             |              |
| Yes                                                         | 40 (20.51)  | 206 (14.10)   | 2.57 [0.75-8.80]           | 0.133            | 0.79 [0.23-2.80]         | 0.720        |
| <b>POBW &lt;15<sup>th</sup> Percentile</b>                  |             |               |                            |                  |                          |              |
| No                                                          | 142 (72.82) | 1,089 (74.54) | 1 [referent]               |                  | 1 [referent]             |              |
| Yes                                                         | 36 (18.46)  | 181 (12.39)   | 1.62 [0.72-3.66]           | 0.246            | 1.74 [0.71-4.25]         | 0.222        |
| Unavailable                                                 | 17 (8.72)   | 191 (13.07)   |                            |                  |                          |              |
| <b>Parity</b>                                               |             |               |                            |                  |                          |              |
| 0                                                           | 51 (26.15)  | 611 (41.82)   | 1 [referent]               |                  | 1 [referent]             |              |
| 1                                                           | 81 (41.54)  | 502 (34.36)   | <b>4.67 [1.71-12.70]</b>   | <b>0.003</b>     | <b>5.12 [1.25-20.99]</b> | <b>0.023</b> |
| ≥2                                                          | 63 (32.31)  | 348 (23.82)   | <b>6.18 [2.09-18.27]</b>   | <b>0.001</b>     | 6.37 [1.00-40.66]        | <b>0.050</b> |
|                                                             |             |               | Overall p-value            | <b>0.002</b>     | Overall p-value          | <b>0.060</b> |
| <b>Child</b>                                                |             |               |                            |                  |                          |              |
| <b>Sex</b>                                                  |             |               |                            |                  |                          |              |
| Female                                                      | 85 (43.59)  | 765 (52.36)   | 1 [referent]               |                  | 1 [referent]             |              |
| Male                                                        | 110 (56.41) | 696 (47.64)   | <b>3.03 [1.60-5.71]</b>    | <b>&lt;0.001</b> | <b>3.57 [1.66-7.65]</b>  | <b>0.001</b> |
| <b>Ethnicity</b>                                            |             |               |                            |                  |                          |              |
| Other                                                       | 165 (84.62) | 1,407 (96.30) | 1 [referent]               |                  | 1 [referent]             |              |
| Indigenous Australian                                       | 30 (15.38)  | 54 (3.70)     | <b>34.27 [7.49-156.82]</b> | <b>&lt;0.001</b> | 2.22 [0.32-15.52]        | 0.420        |
| <b>Child Speaks Language Other Than English at Home</b>     |             |               |                            |                  |                          |              |
| No                                                          | 167 (85.64) | 1,349 (92.33) | 1 [referent]               |                  | 1 [referent]             |              |
| Yes                                                         | 28 (14.36)  | 112 (7.67)    | 3.82 [0.89-16.47]          | 0.072            | 2.14 [0.49-9.35]         | 0.313        |
| <b>Age Category at Time of AEDC Completion</b> <sup>b</sup> |             |               |                            |                  |                          |              |
| 1                                                           | 48 (24.62)  | 273 (18.69)   | 2.09 [0.74-5.89]           | 0.164            | 2.18 [0.77-6.16]         | 0.140        |
| 2                                                           | 128 (65.64) | 1,071 (73.31) | 1 [referent]               |                  | 1 [referent]             |              |
| 3                                                           | 19 (9.74)   | 117 (8.01)    | 2.56 [0.56-11.82]          | 0.227            | 1.06 [0.22-5.19]         | 0.943        |
|                                                             |             |               | Overall p-value            | 0.234            | Overall p-value          | 0.329        |
| <b>Total Number of Siblings</b>                             |             |               |                            |                  |                          |              |
| 1                                                           | 41 (21.03)  | 467 (31.96)   | 1 [referent]               |                  | 1 [referent]             |              |
| 2                                                           | 79 (40.51)  | 575 (39.36)   | <b>2.82 [1.01-7.88]</b>    | <b>0.048</b>     | 0.63 [0.15-2.60]         | 0.523        |
| 3                                                           | 35 (17.95)  | 279 (19.10)   | 2.40 [0.71-8.13]           | 0.160            | 0.23 [0.04-1.40]         | 0.110        |
| >3                                                          | 40 (20.51)  | 140 (9.58)    | <b>17.34 [4.37-68.74]</b>  | <b>&lt;0.001</b> | 2.14 [0.29-15.84]        | 0.455        |
|                                                             |             |               | Overall p-value            | <b>&lt;0.001</b> | Overall p-value          | <b>0.044</b> |
| <b>Sociodemographic</b>                                     |             |               |                            |                  |                          |              |
| <b>Index of Relative Socioeconomic Disadvantage</b>         |             |               |                            |                  |                          |              |
| Lowest Quintile                                             | 141 (72.31) | 1,232 (84.33) | <b>6.87 [1.80-26.28]</b>   | <b>0.005</b>     | 1.52 [0.47-4.94]         | 0.486        |
| > Lowest Quintile                                           | 46 (23.59)  | 191 (13.07)   | 1 [referent]               |                  | 1 [referent]             |              |
| Unavailable                                                 | 8 (4.10)    | 38 (2.60)     |                            |                  |                          |              |

<sup>a</sup> Excluded from multivariable analysis due to small N.

<sup>b</sup> Age categories classified as; 1) ≥3 years 10 months to <5 years and one month, 2) ≥5 years and one month to <5 years and 10 months (reference category), 3) ≥5 years and 10 months to <6 years 10 months.

Table 5. Risk Factors for Developmental Vulnerability on the Communication Skills &amp; General Knowledge Domain.

| Characteristic                                            | DV<br>(N=200)<br>N (%) | NDV<br>(N=1,456)<br>N (%) | Bivariate                 |                  | Multivariable<br>(N=1,352) |              |
|-----------------------------------------------------------|------------------------|---------------------------|---------------------------|------------------|----------------------------|--------------|
|                                                           |                        |                           | OR [95% CI]               | p-value          | aOR [95% CI]               | p-value      |
| <b>Maternal</b>                                           |                        |                           |                           |                  |                            |              |
| <b>Age at Time of Child's Birth (years)</b>               |                        |                           |                           |                  |                            |              |
| <25                                                       | 59 (29.50)             | 163 (11.20)               | <b>13.25 [3.50-50.17]</b> | <b>&lt;0.001</b> | <b>10.96 [2.24-53.75]</b>  | <b>0.003</b> |
| 25-29                                                     | 40 (20.00)             | 344 (23.63)               | 1 [referent]              |                  | 1 [referent]               |              |
| 30-34                                                     | 59 (29.50)             | 547 (37.57)               | 0.74 [0.24-2.28]          | 0.602            | 1.17 [0.33-4.09]           | 0.811        |
| ≥35                                                       | 42 (21.00)             | 402 (27.61)               | 0.75 [0.23-2.47]          | 0.632            | 1.34 [0.34-5.26]           | 0.675        |
|                                                           |                        |                           | Overall p-value           | <b>&lt;0.001</b> | Overall p-value            | <b>0.020</b> |
| <b>Marital Status</b>                                     |                        |                           |                           |                  |                            |              |
| Married (inc. de facto)                                   | 160 (80.00)            | 1,320 (90.66)             | 1 [referent]              |                  | 1 [referent]               |              |
| All Other                                                 | 40 (20.00)             | 130 (8.93)                | <b>14.40 [2.74-75.72]</b> | <b>0.002</b>     | 2.28 [0.52-10.04]          | 0.276        |
| Unavailable                                               | 0 (0.00)               | 6 (0.41)                  |                           |                  |                            |              |
| <b>Occupational Status Scale at Time of Child's Birth</b> |                        |                           |                           |                  |                            |              |
| 0-20                                                      | 68 (34.00)             | 241 (16.55)               | <b>11.20 [3.86-32.50]</b> | <b>&lt;0.001</b> | 2.11 [0.67-6.65]           | 0.203        |
| >20-100                                                   | 117 (58.50)            | 1,168 (80.22)             | 1 [referent]              |                  | 1 [referent]               |              |
| Unavailable                                               | 15 (7.50)              | 47 (3.23)                 |                           |                  |                            |              |
| <b>Pregnancy &amp; Birth</b>                              |                        |                           |                           |                  |                            |              |
| <b>Fertility Treatments</b>                               |                        |                           |                           |                  |                            |              |
| No                                                        | 188 (94.00)            | 1,200 (82.42)             | 1 [referent]              |                  | 1 [referent]               |              |
| Yes                                                       | 12 (6.00)              | 256 (17.58)               | <b>0.10 [0.02-0.39]</b>   | <b>&lt;0.001</b> | 0.32 [0.06-1.64]           | 0.172        |
| <b>Smoking Status During Pregnancy</b>                    |                        |                           |                           |                  |                            |              |
| No                                                        | 148 (74.00)            | 1,270 (87.23)             | 1 [referent]              |                  | 1 [referent]               |              |
| Yes                                                       | 52 (26.00)             | 186 (12.77)               | <b>7.79 [2.61-23.28]</b>  | <b>&lt;0.001</b> | 1.51 [0.42-5.45]           | 0.532        |
| <b>Pre-eclampsia</b>                                      |                        |                           |                           |                  |                            |              |
| No                                                        | 175 (87.50)            | 1,285 (88.26)             | 1 [referent]              |                  | 1 [referent]               |              |
| Yes                                                       | 25 (12.50)             | 171 (11.74)               | 1.07 [0.29-3.90]          | 0.924            | 0.95 [0.21-4.20]           | 0.944        |
| <b>Gestational Diabetes</b>                               |                        |                           |                           |                  |                            |              |
| No                                                        | 187 (93.50)            | 1,367 (93.89)             | 1 [referent]              |                  | 1 [referent]               |              |
| Yes                                                       | 13 (6.50)              | 89 (6.11)                 | 1.16 [0.20-6.72]          | 0.870            | 1.39 [0.23-8.50]           | 0.724        |
| <b>Threatened Abortion</b>                                |                        |                           |                           |                  |                            |              |
| No                                                        | 192 (96.00)            | 1,380 (94.78)             | 1 [referent]              |                  | 1 [referent]               |              |
| Yes                                                       | 8 (4.00)               | 76 (5.22)                 | 0.55 [0.09-3.48]          | 0.524            | 0.37 [0.02-5.73]           | 0.477        |
| <b>Other Pregnancy Related Complications</b>              |                        |                           |                           |                  |                            |              |
| No                                                        | 51 (25.50)             | 525 (36.06)               | 1 [referent]              |                  | 1 [referent]               |              |
| Yes                                                       | 149 (74.50)            | 931 (63.94)               | <b>2.53 [1.07-6.00]</b>   | <b>0.035</b>     | 1.61 [0.53-4.90]           | 0.404        |
| <b>Threatened Preterm Labour</b>                          |                        |                           |                           |                  |                            |              |
| No                                                        | 178 (89.00)            | 1,286 (88.32)             | 1 [referent]              |                  | 1 [referent]               |              |
| Yes                                                       | 22 (11.00)             | 170 (11.68)               | 1.00 [0.27-3.61]          | 0.994            | 0.45 [0.11-1.88]           | 0.272        |
| <b>APH</b>                                                |                        |                           |                           |                  |                            |              |
| No                                                        | 188 (94.00)            | 1,410 (96.84)             | 1 [referent]              |                  | 1 [referent]               |              |
| Yes                                                       | 12 (6.00)              | 46 (3.16)                 | 9.09 [0.70-117.63]        | 0.091            | 1.15 [0.12-11.44]          | 0.905        |
| <b>Placenta Praevia<sup>a</sup></b>                       |                        |                           |                           |                  |                            |              |
| No                                                        | 200 (100.00)           | 1,446 (99.31)             |                           |                  |                            |              |
| Yes                                                       | 0 (0.00)               | 10 (0.69)                 |                           |                  |                            |              |
| <b>Placental Abruption<sup>a</sup></b>                    |                        |                           |                           |                  |                            |              |
| No                                                        | 199 (99.50)            | 1,451 (99.66)             |                           |                  |                            |              |
| Yes                                                       | 1 (0.50)               | 5 (0.34)                  |                           |                  |                            |              |
| <b>Fetal Distress</b>                                     |                        |                           |                           |                  |                            |              |
| No                                                        | 172 (86.00)            | 1,346 (92.45)             | 1 [referent]              |                  | 1 [referent]               |              |
| Yes                                                       | 28 (14.00)             | 110 (7.55)                | 4.73 [1.00-22.38]         | 0.050            | 2.21 [0.52-9.41]           | 0.285        |
| <b>Cephalopelvic Disproportion<sup>a</sup></b>            |                        |                           |                           |                  |                            |              |
| No                                                        | 200 (100.00)           | 1,452 (99.73)             |                           |                  |                            |              |
| Yes                                                       | 0 (0.00)               | 4 (0.27)                  |                           |                  |                            |              |
| <b>Prolapsed Cord<sup>a</sup></b>                         |                        |                           |                           |                  |                            |              |

|                                                             |             |               |                            |                  |                           |                  |
|-------------------------------------------------------------|-------------|---------------|----------------------------|------------------|---------------------------|------------------|
| No                                                          | 200 (100)   | 1,443 (99.11) |                            |                  |                           |                  |
| Yes                                                         | 0 (0.00)    | 13 (0.89)     |                            |                  |                           |                  |
| <b>Precipitate Delivery</b> <sup>a</sup>                    |             |               |                            |                  |                           |                  |
| No                                                          | 195 (97.50) | 1,435 (98.56) |                            |                  |                           |                  |
| Yes                                                         | 5 (2.50)    | 21 (1.44)     |                            |                  |                           |                  |
| <b>PPH ≥500mls</b>                                          |             |               |                            |                  |                           |                  |
| No                                                          | 122 (61.00) | 1,077 (73.97) | 1 [referent]               |                  | 1 [referent]              |                  |
| Yes                                                         | 78 (39.00)  | 379 (26.03)   | <b>3.72 [1.41-9.86]</b>    | <b>0.008</b>     | 2.38 [0.84-6.74]          | 0.104            |
| <b>TSR ≥2mins</b>                                           |             |               |                            |                  |                           |                  |
| No                                                          | 163 (81.50) | 1,261 (86.61) | 1 [referent]               |                  | 1 [referent]              |                  |
| Yes                                                         | 37 (18.50)  | 195 (13.39)   | <b>2.80 [1.08-7.22]</b>    | <b>0.034</b>     | 1.55 [0.50-4.86]          | 0.448            |
| <b>Apgar 5-minutes &lt;7</b> <sup>a</sup>                   |             |               |                            |                  |                           |                  |
| No                                                          | 198 (99.00) | 1,425 (97.87) |                            |                  |                           |                  |
| Yes                                                         | 2 (1.00)    | 31 (2.13)     |                            |                  |                           |                  |
| <b>Intubation</b>                                           |             |               |                            |                  |                           |                  |
| No                                                          | 162 (81.00) | 1,227 (84.27) | 1 [referent]               |                  | 1 [referent]              |                  |
| Yes                                                         | 38 (19.00)  | 229 (15.73)   | 1.91 [0.80-4.56]           | 0.147            | 1.32 [0.45-3.90]          | 0.614            |
| <b>Early Preterm Birth</b>                                  |             |               |                            |                  |                           |                  |
| No                                                          | 157 (78.50) | 1,253 (86.06) | 1 [referent]               |                  | 1 [referent]              |                  |
| Yes                                                         | 43 (21.50)  | 203 (13.94)   | 3.73 [0.99-14.09]          | 0.053            | 1.68 [0.48-5.82]          | 0.413            |
| <b>POBW &lt;15<sup>th</sup> Percentile</b>                  |             |               |                            |                  |                           |                  |
| No                                                          | 146 (73.00) | 1,085 (74.52) | 1 [referent]               |                  | 1 [referent]              |                  |
| Yes                                                         | 36 (18.00)  | 181 (12.43)   | 1.83 [0.78-4.33]           | 0.166            | 1.77 [0.72-4.32]          | 0.211            |
| Unavailable                                                 | 18 (9.00)   | 190 (13.05)   |                            |                  |                           |                  |
| <b>Parity</b>                                               |             |               |                            |                  |                           |                  |
| 0                                                           | 65 (32.50)  | 597 (41.00)   | 1 [referent]               |                  | 1 [referent]              |                  |
| 1                                                           | 68 (34.00)  | 515 (35.37)   | 1.51 [0.59-3.86]           | 0.385            | 1.56 [0.38-6.42]          | 0.536            |
| ≥2                                                          | 67 (33.50)  | 344 (23.63)   | <b>4.54 [1.47-14.09]</b>   | <b>0.009</b>     | 2.48 [0.38-15.95]         | 0.340            |
|                                                             |             |               | Overall p-value            | 0.032            | Overall p-value           | 0.633            |
| <b>Child</b>                                                |             |               |                            |                  |                           |                  |
| <b>Sex</b>                                                  |             |               |                            |                  |                           |                  |
| Female                                                      | 87 (43.50)  | 763 (52.40)   | 1 [referent]               |                  | 1 [referent]              |                  |
| Male                                                        | 113 (56.50) | 693 (47.60)   | <b>3.00 [1.56-5.79]</b>    | <b>0.001</b>     | <b>3.26 [1.49-7.10]</b>   | <b>0.003</b>     |
| <b>Ethnicity</b>                                            |             |               |                            |                  |                           |                  |
| Other                                                       | 179 (89.50) | 1,393 (95.67) | 1 [referent]               |                  | 1 [referent]              |                  |
| Indigenous Australian                                       | 21 (10.50)  | 63 (4.33)     | <b>21.66 [2.34-200.50]</b> | <b>0.007</b>     | 0.81 [0.10-6.68]          | 0.842            |
| <b>Child Speaks Language Other Than English at Home</b>     |             |               |                            |                  |                           |                  |
| No                                                          | 161 (80.50) | 1,355 (93.06) | 1 [referent]               |                  | 1 [referent]              |                  |
| Yes                                                         | 39 (19.50)  | 101 (6.94)    | <b>11.16 [3.30-37.77]</b>  | <b>&lt;0.001</b> | <b>17.83 [4.10-77.61]</b> | <b>&lt;0.001</b> |
| <b>Age Category at Time of AEDC Completion</b> <sup>b</sup> |             |               |                            |                  |                           |                  |
| 1                                                           | 57 (28.50)  | 264 (18.13)   | <b>5.60 [1.73-18.09]</b>   | <b>0.004</b>     | <b>6.01 [1.97-18.31]</b>  | <b>0.002</b>     |
| 2                                                           | 125 (62.50) | 1,074 (73.76) | 1 [referent]               |                  | 1 [referent]              |                  |
| 3                                                           | 18 (9.00)   | 118 (8.10)    | 1.91 [0.44-8.30]           | 0.387            | 1.30 [0.24-6.95]          | 0.762            |
|                                                             |             |               | Overall p-value            | <b>0.017</b>     | Overall p-value           | <b>0.007</b>     |
| <b>Total Number of Siblings</b>                             |             |               |                            |                  |                           |                  |
| 1                                                           | 49 (24.50)  | 459 (31.52)   | 1 [referent]               |                  | 1 [referent]              |                  |
| 2                                                           | 77 (38.50)  | 577 (39.63)   | 1.54 [0.58-4.13]           | 0.387            | 0.88 [0.20-3.81]          | 0.864            |
| 3                                                           | 37 (18.50)  | 277 (19.02)   | 1.64 [0.49-5.44]           | 0.419            | 1.11 [0.18-6.78]          | 0.913            |
| >3                                                          | 37 (18.50)  | 143 (9.82)    | <b>15.85 [2.91-86.42]</b>  | <b>0.001</b>     | 4.07 [0.48-34.47]         | 0.198            |
|                                                             |             |               | Overall p-value            | <b>0.015</b>     | Overall p-value           | 0.371            |
| <b>Sociodemographic</b>                                     |             |               |                            |                  |                           |                  |
| <b>Index of Relative Socioeconomic Disadvantage</b>         |             |               |                            |                  |                           |                  |
| Lowest Quintile                                             | 153 (76.50) | 1,220 (83.79) | <b>4.24 [1.12-16.03]</b>   | <b>0.033</b>     | 0.92 [0.26-3.26]          | 0.890            |
| > Lowest Quintile                                           | 42 (21.00)  | 195 (13.39)   | 1 [referent]               |                  | 1 [referent]              |                  |
| Unavailable                                                 | 5 (2.50)    | 41 (2.82)     |                            |                  |                           |                  |

<sup>a</sup> Excluded from multivariable analysis due to small N.

<sup>b</sup> Age categories classified as; 1) ≥3 years 10 months to <5 years and one month, 2) ≥5 years and one month to <5 years and 10 months (reference category), 3) ≥5 years and 10 months to <6 years 10 months.

**STROBE 2007 (v4) Statement—Checklist of items that should be included in reports of *cohort studies***

| Section/Topic                | Item # | Recommendation                                                                                                                                                                       | Reported on page # |
|------------------------------|--------|--------------------------------------------------------------------------------------------------------------------------------------------------------------------------------------|--------------------|
| <b>Title and abstract</b>    | 1      | (a) Indicate the study's design with a commonly used term in the title or the abstract                                                                                               | 3                  |
|                              |        | (b) Provide in the abstract an informative and balanced summary of what was done and what was found                                                                                  | 3                  |
| <b>Introduction</b>          |        |                                                                                                                                                                                      |                    |
| Background/rationale         | 2      | Explain the scientific background and rationale for the investigation being reported                                                                                                 | 5-6                |
| Objectives                   | 3      | State specific objectives, including any prespecified hypotheses                                                                                                                     | 6                  |
| <b>Methods</b>               |        |                                                                                                                                                                                      |                    |
| Study design                 | 4      | Present key elements of study design early in the paper                                                                                                                              | 3                  |
| Setting                      | 5      | Describe the setting, locations, and relevant dates, including periods of recruitment, exposure, follow-up, and data collection                                                      | 3 and 7            |
| Participants                 | 6      | (a) Give the eligibility criteria, and the sources and methods of selection of participants. Describe methods of follow-up                                                           | 7                  |
|                              |        | (b) For matched studies, give matching criteria and number of exposed and unexposed                                                                                                  | n/a                |
| Variables                    | 7      | Clearly define all outcomes, exposures, predictors, potential confounders, and effect modifiers. Give diagnostic criteria, if applicable                                             | 6-10               |
| Data sources/<br>measurement | 8*     | For each variable of interest, give sources of data and details of methods of assessment (measurement). Describe comparability of assessment methods if there is more than one group | 6-10               |
| Bias                         | 9      | Describe any efforts to address potential sources of bias                                                                                                                            | 6-10               |
| Study size                   | 10     | Explain how the study size was arrived at                                                                                                                                            | 7                  |
| Quantitative variables       | 11     | Explain how quantitative variables were handled in the analyses. If applicable, describe which groupings were chosen and why                                                         | 7-10               |
| Statistical methods          | 12     | (a) Describe all statistical methods, including those used to control for confounding                                                                                                | 10                 |
|                              |        | (b) Describe any methods used to examine subgroups and interactions                                                                                                                  | 10                 |
|                              |        | (c) Explain how missing data were addressed                                                                                                                                          | 10                 |
|                              |        | (d) If applicable, explain how loss to follow-up was addressed                                                                                                                       | 10                 |
|                              |        | (e) Describe any sensitivity analyses                                                                                                                                                | 10                 |
| <b>Results</b>               |        |                                                                                                                                                                                      |                    |

|                          |     |                                                                                                                                                                                                                                                                                                                                                                                                               |                                 |
|--------------------------|-----|---------------------------------------------------------------------------------------------------------------------------------------------------------------------------------------------------------------------------------------------------------------------------------------------------------------------------------------------------------------------------------------------------------------|---------------------------------|
| Participants             | 13* | (a) Report numbers of individuals at each stage of study—eg numbers potentially eligible, examined for eligibility, confirmed eligible, included in the study, completing follow-up, and analysed<br>(b) Give reasons for non-participation at each stage<br>(c) Consider use of a flow diagram                                                                                                               | 7-11<br>N/A<br>N/A              |
| Descriptive data         | 14* | (a) Give characteristics of study participants (eg demographic, clinical, social) and information on exposures and potential confounders<br>(b) Indicate number of participants with missing data for each variable of interest<br>(c) Summarise follow-up time (eg, average and total amount)                                                                                                                | 10-11 and 26-29<br>26-31<br>N/A |
| Outcome data             | 15* | Report numbers of outcome events or summary measures over time                                                                                                                                                                                                                                                                                                                                                | 26-29                           |
| Main results             | 16  | (a) Give unadjusted estimates and, if applicable, confounder-adjusted estimates and their precision (eg, 95% confidence interval). Make clear which confounders were adjusted for and why they were included<br>(b) Report category boundaries when continuous variables were categorized<br>(c) If relevant, consider translating estimates of relative risk into absolute risk for a meaningful time period | 10-11 and 26-29<br>10-11<br>N/A |
| Other analyses           | 17  | Report other analyses done—eg analyses of subgroups and interactions, and sensitivity analyses                                                                                                                                                                                                                                                                                                                | N/A                             |
| <b>Discussion</b>        |     |                                                                                                                                                                                                                                                                                                                                                                                                               |                                 |
| Key results              | 18  | Summarise key results with reference to study objectives                                                                                                                                                                                                                                                                                                                                                      | 11                              |
| <b>Limitations</b>       |     |                                                                                                                                                                                                                                                                                                                                                                                                               |                                 |
| Interpretation           | 20  | Give a cautious overall interpretation of results considering objectives, limitations, multiplicity of analyses, results from similar studies, and other relevant evidence                                                                                                                                                                                                                                    | 4 and 14                        |
| Generalisability         | 21  | Discuss the generalisability (external validity) of the study results                                                                                                                                                                                                                                                                                                                                         | 15                              |
| <b>Other information</b> |     |                                                                                                                                                                                                                                                                                                                                                                                                               |                                 |
| Funding                  | 22  | Give the source of funding and the role of the funders for the present study and, if applicable, for the original study on which the present article is based                                                                                                                                                                                                                                                 | 17                              |

\*Give information separately for cases and controls in case-control studies and, if applicable, for exposed and unexposed groups in cohort and cross-sectional studies.

**Note:** An Explanation and Elaboration article discusses each checklist item and gives methodological background and published examples of transparent reporting. The STROBE checklist is best used in conjunction with this article (freely available on the Web sites of PLoS Medicine at <http://www.plosmedicine.org/>, Annals of Internal Medicine at <http://www.annals.org/>, and Epidemiology at <http://www.epidem.com/>). Information on the STROBE Initiative is available at [www.strobe-statement.org](http://www.strobe-statement.org).
