# Supplementary material for: Associations between biological and sociodemographic risks for developmental vulnerability in twins at age 5: a population data linkage study in Western Australia
Source: PubMed Central journal article supplement — BMJ Open. 2020 Oct 16;10(10):e038846. doi: 10.1136/bmjopen-2020-038846 (PMC7569973; doi:10.1136/bmjopen-2020-038846), 2020-10-16
Supplement: bmjopen-2020-038846supp001.pdf [file bmjopen-2020-038846supp001.pdf]

## Supplementary Tables

Table 1. Risk Factors for Developmental Vulnerability on the Physical Health &amp; Wellbeing Domain.

| Characteristic                                            | DV<br>(N=188)<br>N (%) | NDV<br>(N=1,468)<br>N (%) | Bivariate                |                  | Multivariable<br>(N=1,352) |         |
|-----------------------------------------------------------|------------------------|---------------------------|--------------------------|------------------|----------------------------|---------|
|                                                           |                        |                           | OR [95% CI]              | p-value          | aOR [95% CI]               | p-value |
| <b>Maternal</b>                                           |                        |                           |                          |                  |                            |         |
| <b>Age at Time of Child's Birth (years)</b>               |                        |                           |                          |                  |                            |         |
| <25                                                       | 46 (24.47)             | 176 (11.99)               | <b>5.36 [1.64-17.48]</b> | <b>0.002</b>     | 3.59 [0.93-13.90]          | 0.065   |
| 25-29                                                     | 39 (20.74)             | 345 (23.50)               | 1 [referent]             |                  | 1 [referent]               |         |
| 30-34                                                     | 62 (32.98)             | 544 (37.06)               | 1.08 [0.41-2.87]         | 0.646            | 1.13 [0.39-3.25]           | 0.821   |
| ≥35                                                       | 41 (21.81)             | 403 (27.45)               | 0.83 [0.29-2.38]         | 0.776            | 0.97 [0.30-3.13]           | 0.959   |
|                                                           |                        |                           | Overall p-value          | <b>0.009</b>     | Overall p-value            | 0.269   |
| <b>Marital Status</b>                                     |                        |                           |                          |                  |                            |         |
| Married (inc. de facto)                                   | 152 (80.85)            | 1,328 (90.46)             | 1 [referent]             |                  | 1 [referent]               |         |
| All Other                                                 | 36 (19.15)             | 134 (9.13)                | <b>5.54 [1.87-16.35]</b> | <b>0.002</b>     | 2.39 [0.66-8.70]           | 0.185   |
| Unavailable                                               | 0 (0.00)               | 6 (0.41)                  |                          |                  |                            |         |
| <b>Occupational Status Scale at Time of Child's Birth</b> |                        |                           |                          |                  |                            |         |
| 0-20                                                      | 52 (27.66)             | 257 (17.51)               | <b>3.29 [1.40-7.75]</b>  | <b>0.025</b>     | 0.79 [0.28-2.27]           | 0.663   |
| >20-100                                                   | 119 (63.30)            | 1,166 (79.43)             | 1 [referent]             |                  | 1 [referent]               |         |
| Unavailable                                               | 17 (9.04)              | 45 (3.07)                 |                          |                  |                            |         |
| <b>Pregnancy &amp; Birth</b>                              |                        |                           |                          |                  |                            |         |
| <b>Fertility Treatments</b>                               |                        |                           |                          |                  |                            |         |
| No                                                        | 163 (86.70)            | 1,225 (83.45)             | 1 [referent]             |                  | 1 [referent]               |         |
| Yes                                                       | 25 (13.30)             | 243 (16.55)               | 0.61 [0.21-1.75]         | 0.359            | 1.07 [0.32-3.62]           | 0.914   |
| <b>Smoking Status During Pregnancy</b>                    |                        |                           |                          |                  |                            |         |
| No                                                        | 134 (71.28)            | 1,284 (87.47)             | 1 [referent]             |                  | 1 [referent]               |         |
| Yes                                                       | 54 (28.72)             | 184 (12.53)               | <b>7.19 [2.76-18.70]</b> | <b>&lt;0.001</b> | 2.49 [0.83-7.51]           | 0.105   |
| <b>Pre-eclampsia</b>                                      |                        |                           |                          |                  |                            |         |
| No                                                        | 163 (86.70)            | 1,297 (88.35)             | 1 [referent]             |                  | 1 [referent]               |         |
| Yes                                                       | 25 (13.30)             | 171 (11.65)               | 1.56 [0.46-5.24]         | 0.475            | 2.99 [0.90-9.91]           | 0.074   |
| <b>Gestational Diabetes</b>                               |                        |                           |                          |                  |                            |         |
| No                                                        | 173 (92.02)            | 1,381 (94.07)             | 1 [referent]             |                  | 1 [referent]               |         |
| Yes                                                       | 15 (7.98)              | 87 (5.93)                 | 1.87 [0.36-9.87]         | 0.460            | 2.26 [0.50-10.20]          | 0.290   |
| <b>Threatened Abortion</b>                                |                        |                           |                          |                  |                            |         |
| No                                                        | 182 (96.81)            | 1,390 (94.69)             | 1 [referent]             |                  | 1 [referent]               |         |
| Yes                                                       | 6 (3.19)               | 78 (5.31)                 | 0.45 [0.07-2.71]         | 0.379            | 0.43 [0.05-3.77]           | 0.443   |
| <b>Other Pregnancy Related Complications</b>              |                        |                           |                          |                  |                            |         |
| No                                                        | 51 (27.13)             | 525 (35.76)               | 1 [referent]             |                  | 1 [referent]               |         |
| Yes                                                       | 137 (72.87)            | 943 (64.24)               | 1.96 [0.87-4.42]         | 0.103            | 1.69 [0.65-4.42]           | 0.284   |
| <b>Threatened Preterm Labour</b>                          |                        |                           |                          |                  |                            |         |
| No                                                        | 161 (85.64)            | 1,303 (88.76)             | 1 [referent]             |                  | 1 [referent]               |         |
| Yes                                                       | 27 (14.36)             | 165 (11.24)               | 1.68 [0.49-5.81]         | 0.411            | 0.86 [0.26-2.82]           | 0.797   |
| <b>APH</b>                                                |                        |                           |                          |                  |                            |         |
| No                                                        | 178 (94.68)            | 1,420 (96.73)             | 1 [referent]             |                  | 1 [referent]               |         |
| Yes                                                       | 10 (5.32)              | 48 (3.27)                 | 3.27 [0.37-28.63]        | 0.285            | 0.73 [0.09-5.96]           | 0.766   |
| <b>Placenta Praevia <sup>a</sup></b>                      |                        |                           |                          |                  |                            |         |
| No                                                        | 187 (99.47)            | 1,459 (99.39)             |                          |                  |                            |         |
| Yes                                                       | 1 (0.53)               | 9 (0.61)                  |                          |                  |                            |         |
| <b>Placental Abruption <sup>a</sup></b>                   |                        |                           |                          |                  |                            |         |
| No                                                        | 185 (98.40)            | 1,465 (99.8)              |                          |                  |                            |         |
| Yes                                                       | 3 (1.60)               | 3 (0.20)                  |                          |                  |                            |         |
| <b>Fetal Distress</b>                                     |                        |                           |                          |                  |                            |         |
| No                                                        | 162 (86.17)            | 1,356 (92.37)             | 1 [referent]             |                  | 1 [referent]               |         |
| Yes                                                       | 26 (13.83)             | 112 (7.63)                | <b>4.89 [1.20-19.90]</b> | <b>0.027</b>     | 2.57 [0.72-9.19]           | 0.145   |
| <b>Cephalopelvic Disproportion <sup>a</sup></b>           |                        |                           |                          |                  |                            |         |
| No                                                        | 188 (100.00)           | 1,464 (99.73)             |                          |                  |                            |         |
| Yes                                                       | 0 (0.00)               | 4 (0.27)                  |                          |                  |                            |         |
| <b>Prolapsed Cord <sup>a</sup></b>                        |                        |                           |                          |                  |                            |         |

|                                                         |              |               |                           |                  |                          |                  |
|---------------------------------------------------------|--------------|---------------|---------------------------|------------------|--------------------------|------------------|
| No                                                      | 188 (100.00) | 1,455 (99.11) |                           |                  |                          |                  |
| Yes                                                     | 0 (0.00)     | 13 (0.89)     |                           |                  |                          |                  |
| <b>Precipitate Delivery <sup>a</sup></b>                |              |               |                           |                  |                          |                  |
| No                                                      | 186 (98.94)  | 1,444 (98.37) |                           |                  |                          |                  |
| Yes                                                     | 2 (1.06)     | 24 (1.63)     |                           |                  |                          |                  |
| <b>PPH ≥500mls</b>                                      |              |               |                           |                  |                          |                  |
| No                                                      | 124 (65.96)  | 1,075 (73.23) | 1 [referent]              |                  | 1 [referent]             |                  |
| Yes                                                     | 64 (34.04)   | 393 (26.77)   | 2.16 [0.90-5.18]          | 0.084            | 0.90 [0.36-2.25]         | 0.826            |
| <b>TSR ≥2mins</b>                                       |              |               |                           |                  |                          |                  |
| No                                                      | 152 (80.85)  | 1,272 (86.65) | 1 [referent]              |                  | 1 [referent]             |                  |
| Yes                                                     | 36 (19.15)   | 196 (13.35)   | 1.48 [0.64-3.44]          | 0.363            | 0.55 [0.19-1.55]         | 0.258            |
| <b>Apgar 5-minutes &lt;7 <sup>a</sup></b>               |              |               |                           |                  |                          |                  |
| No                                                      | 182 (96.81)  | 1,441 (98.16) |                           |                  |                          |                  |
| Yes                                                     | 6 (3.19)     | 27 (1.84)     |                           |                  |                          |                  |
| <b>Intubation</b>                                       |              |               |                           |                  |                          |                  |
| No                                                      | 147 (78.19)  | 1,242 (84.60) | 1 [referent]              |                  | 1 [referent]             |                  |
| Yes                                                     | 41 (21.81)   | 226 (15.40)   | <b>2.33 [1.03-5.28]</b>   | <b>0.043</b>     | 1.96 [0.75-5.10]         | 0.167            |
| <b>Early Preterm Birth</b>                              |              |               |                           |                  |                          |                  |
| No                                                      | 146 (77.66)  | 1,264 (86.1)  | 1 [referent]              |                  | 1 [referent]             |                  |
| Yes                                                     | 42 (22.34)   | 204 (13.9)    | <b>3.76 [1.21-11.68]</b>  | <b>0.022</b>     | 2.15 [0.76-6.11]         | 0.151            |
| <b>POBW &lt;15<sup>th</sup> Percentile</b>              |              |               |                           |                  |                          |                  |
| No                                                      | 125 (66.49)  | 1,106 (75.34) | 1 [referent]              |                  | 1 [referent]             |                  |
| Yes                                                     | 42 (22.34)   | 175 (11.92)   | <b>3.44 [1.53-7.74]</b>   | <b>0.003</b>     | <b>2.58 [1.15-5.77]</b>  | <b>0.022</b>     |
| Unavailable                                             | 21 (11.17)   | 187 (12.74)   |                           |                  |                          |                  |
| <b>Parity</b>                                           |              |               |                           |                  |                          |                  |
| 0                                                       | 67 (35.64)   | 595 (40.53)   | 1 [referent]              |                  | 1 [referent]             |                  |
| 1                                                       | 65 (34.57)   | 518 (35.29)   | 1.18 [0.48-2.86]          | 0.721            | 1.29 [0.41-4.08]         | 0.665            |
| ≥2                                                      | 56 (29.79)   | 355 (24.18)   | 1.81 [0.67-4.91]          | 0.244            | 1.53 [0.29-8.17]         | 0.617            |
|                                                         |              |               | Overall p-value           | 0.503            | Overall p-value          | 0.866            |
| <b>Child</b>                                            |              |               |                           |                  |                          |                  |
| <b>Sex</b>                                              |              |               |                           |                  |                          |                  |
| Female                                                  | 82 (43.62)   | 768 (52.32)   | 1 [referent]              |                  | 1 [referent]             |                  |
| Male                                                    | 106 (56.38)  | 700 (47.68)   | <b>2.50 [1.36-4.61]</b>   | <b>0.003</b>     | <b>3.31 [1.64-6.69]</b>  | <b>&lt;0.001</b> |
| <b>Ethnicity</b>                                        |              |               |                           |                  |                          |                  |
| Other                                                   | 167 (88.83)  | 1,405 (95.71) | 1 [referent]              |                  | 1 [referent]             |                  |
| Indigenous Australian                                   | 21 (11.17)   | 63 (4.29)     | <b>12.56 [2.12-74.52]</b> | <b>0.005</b>     | 0.80 [0.12-5.40]         | 0.816            |
| <b>Child Speaks Language Other Than English at Home</b> |              |               |                           |                  |                          |                  |
| No                                                      | 159 (84.57)  | 1,357 (92.44) | 1 [referent]              |                  | 1 [referent]             |                  |
| Yes                                                     | 29 (15.43)   | 111 (7.56)    | <b>4.62 [1.24-17.26]</b>  | <b>0.023</b>     | <b>4.84 [1.34-17.48]</b> | <b>0.016</b>     |
| <b>Age Category at Time of AEDC Completion</b>          |              |               |                           |                  |                          |                  |
| 1                                                       | 50 (26.60)   | 271 (18.46)   | <b>2.76 [1.02-7.46]</b>   | <b>&lt;0.001</b> | 2.22 [0.88-5.60]         | 0.092            |
| 2                                                       | 129 (68.62)  | 1,070 (72.89) | 1 [referent]              |                  | 1 [referent]             |                  |
| 3                                                       | 9 (4.79)     | 127 (8.65)    | 0.44 [0.10-1.93]          | 0.942            | 0.19 [0.03-1.18]         | 0.074            |
|                                                         |              |               | Overall p-value           | <b>0.049</b>     | Overall p-value          | <b>0.033</b>     |
| <b>Total Number of Siblings</b>                         |              |               |                           |                  |                          |                  |
| 1                                                       | 51 (27.13)   | 457 (31.13)   | 1 [referent]              |                  | 1 [referent]             |                  |
| 2                                                       | 69 (36.70)   | 585 (39.85)   | 1.10 [0.46-2.63]          | 0.827            | 0.98 [0.30-3.15]         | 0.970            |
| 3                                                       | 24 (12.77)   | 290 (19.75)   | 0.51 [0.16-1.57]          | 0.239            | 0.41 [0.08-2.10]         | 0.284            |
| >3                                                      | 44 (23.40)   | 136 (9.26)    | <b>8.32 [2.57-26.96]</b>  | <b>&lt;0.001</b> | 6.47 [0.98-42.75]        | 0.053            |
|                                                         |              |               | Overall p-value           | <b>&lt;0.001</b> | Overall p-value          | <b>0.008</b>     |
| <b>Sociodemographic</b>                                 |              |               |                           |                  |                          |                  |
| <b>Index of Relative Socioeconomic Disadvantage</b>     |              |               |                           |                  |                          |                  |
| Lowest Quintile                                         | 138 (73.40)  | 1,235 (84.13) | <b>3.78 [1.17-12.22]</b>  | <b>0.026</b>     | 1.85 [0.63-5.44]         | 0.264            |
| > Lowest Quintile                                       | 40 (21.28)   | 197 (13.42)   | 1 [referent]              |                  | 1 [referent]             |                  |
| Unavailable                                             | 10 (5.32)    | 36 (2.45)     |                           |                  |                          |                  |

<sup>a</sup> Excluded from multivariable analysis due to small N.

<sup>b</sup> Age categories classified as; 1) ≥3 years 10 months to <5 years and one month, 2) ≥5 years and one month to <5 years and 10 months (reference category), 3) ≥5 years and 10 months to <6 years 10 months.

Table 2. Risk Factors for Developmental Vulnerability on the Social Competence Domain.

| Characteristic                                            | DV<br>(N=151)<br>N (%) | NDV<br>(N=1,505)<br>N (%) | Bivariate                |                  | Multivariable<br>(N=1,352) |              |
|-----------------------------------------------------------|------------------------|---------------------------|--------------------------|------------------|----------------------------|--------------|
|                                                           |                        |                           | OR [95% CI]              | p-value          | aOR [95% CI]               | p-value      |
| <b>Maternal</b>                                           |                        |                           |                          |                  |                            |              |
| <b>Age at Time of Child's Birth (years)</b>               |                        |                           |                          |                  |                            |              |
| <25                                                       | 43 (28.48)             | 179 (11.89)               | <b>6.32 [1.91-20.95]</b> | <b>0.003</b>     | 3.13 [0.74-13.30]          | 0.122        |
| 25-29                                                     | 31 (20.53)             | 353 (23.46)               | 1 [referent]             |                  | 1 [referent]               |              |
| 30-34                                                     | 44 (29.14)             | 562 (37.34)               | 0.78 [0.29-2.15]         | 0.634            | 1.36 [0.43-4.36]           | 0.604        |
| ≥35                                                       | 33 (21.85)             | 411 (27.31)               | 0.81 [0.27-2.37]         | 0.696            | 0.99 [0.27-3.59]           | 0.982        |
|                                                           |                        |                           | Overall p-value          | <b>0.002</b>     | Overall p-value            | 0.431        |
| <b>Marital Status</b>                                     |                        |                           |                          |                  |                            |              |
| Married (inc. de facto)                                   | 113 (74.83)            | 1,367 (90.83)             | 1 [referent]             |                  | 1 [referent]               |              |
| All Other                                                 | 36 (23.84)             | 134 (8.90)                | <b>9.65 [3.20-29.05]</b> | <b>&lt;0.001</b> | <b>10.16 [2.56-40.41]</b>  | <b>0.001</b> |
| Unavailable                                               | 2 (1.32)               | 4 (0.27)                  |                          |                  |                            |              |
| <b>Occupational Status Scale at Time of Child's Birth</b> |                        |                           |                          |                  |                            |              |
| 0-20                                                      | 50 (33.11)             | 259 (17.21)               | <b>5.05 [2.07-12.29]</b> | <b>&lt;0.001</b> | 1.93 [0.64-5.79]           | 0.241        |
| >20-100                                                   | 94 (62.25)             | 1,191 (79.14)             | 1 [referent]             |                  | 1 [referent]               |              |
| Unavailable                                               | 7 (4.64)               | 55 (3.65)                 |                          |                  |                            |              |
| <b>Pregnancy &amp; Birth</b>                              |                        |                           |                          |                  |                            |              |
| <b>Fertility Treatments</b>                               |                        |                           |                          |                  |                            |              |
| No                                                        | 132 (87.42)            | 1,256 (83.46)             | 1 [referent]             |                  | 1 [referent]               |              |
| Yes                                                       | 19 (12.58)             | 249 (16.54)               | 0.54 [0.18-1.60]         | 0.269            | 1.38 [0.37-5.17]           | 0.635        |
| <b>Smoking Status During Pregnancy</b>                    |                        |                           |                          |                  |                            |              |
| No                                                        | 116 (76.82)            | 1,302 (86.51)             | 1 [referent]             |                  | 1 [referent]               |              |
| Yes                                                       | 35 (23.18)             | 203 (13.49)               | <b>3.70 [1.06-12.91]</b> | <b>0.041</b>     | 1.22 [0.35-4.20]           | 0.753        |
| <b>Pre-eclampsia</b>                                      |                        |                           |                          |                  |                            |              |
| No                                                        | 134 (88.74)            | 1,326 (88.11)             | 1 [referent]             |                  | 1 [referent]               |              |
| Yes                                                       | 17 (11.26)             | 179 (11.89)               | 0.98 [0.31-3.14]         | 0.975            | 1.84 [0.49-6.84]           | 0.365        |
| <b>Gestational Diabetes</b>                               |                        |                           |                          |                  |                            |              |
| No                                                        | 140 (92.72)            | 1,414 (93.95)             | 1 [referent]             |                  | 1 [referent]               |              |
| Yes                                                       | 11 (7.28)              | 91 (6.05)                 | 1.46 [0.32-6.60]         | 0.627            | 2.11 [0.41-10.74]          | 0.369        |
| <b>Threatened Abortion</b>                                |                        |                           |                          |                  |                            |              |
| No                                                        | 144 (95.36)            | 1,428 (94.88)             | 1 [referent]             |                  | 1 [referent]               |              |
| Yes                                                       | 7 (4.64)               | 77 (5.12)                 | 0.66 [0.11-4.10]         | 0.658            | 0.13 [0.01-2.43]           | 0.171        |
| <b>Other Pregnancy Related Complications</b>              |                        |                           |                          |                  |                            |              |
| No                                                        | 38 (25.17)             | 538 (35.75)               | 1 [referent]             |                  | 1 [referent]               |              |
| Yes                                                       | 113 (74.83)            | 967 (64.25)               | 2.15 [0.89-5.19]         | 0.088            | 2.00 [0.70-5.74]           | 0.196        |
| <b>Threatened Preterm Labour</b>                          |                        |                           |                          |                  |                            |              |
| No                                                        | 131 (86.75)            | 1,333 (88.57)             | 1 [referent]             |                  | 1 [referent]               |              |
| Yes                                                       | 20 (13.25)             | 172 (11.43)               | 1.32 [0.42-4.17]         | 0.640            | 0.69 [0.19-2.59]           | 0.584        |
| <b>APH</b>                                                |                        |                           |                          |                  |                            |              |
| No                                                        | 142 (94.04)            | 1,456 (96.74)             | 1 [referent]             |                  | 1 [referent]               |              |
| Yes                                                       | 9 (5.96)               | 49 (3.26)                 | 3.74 [0.62-22.66]        | 0.151            | 2.12 [0.27-16.50]          | 0.473        |
| <b>Placenta Praevia <sup>a</sup></b>                      |                        |                           |                          |                  |                            |              |
| No                                                        | 151 (100.00)           | 1,495 (99.34)             |                          |                  |                            |              |
| Yes                                                       | 0 (0.00)               | 10 (0.66)                 |                          |                  |                            |              |
| <b>Placental Abruption <sup>a</sup></b>                   |                        |                           |                          |                  |                            |              |
| No                                                        | 149 (98.68)            | 1,501 (99.73)             |                          |                  |                            |              |
| Yes                                                       | 2 (1.32)               | 4 (0.27)                  |                          |                  |                            |              |
| <b>Fetal Distress</b>                                     |                        |                           |                          |                  |                            |              |
| No                                                        | 132 (87.42)            | 1,386 (92.09)             | 1 [referent]             |                  | 1 [referent]               |              |
| Yes                                                       | 19 (12.58)             | 119 (7.91)                | 2.77 [0.81-9.50]         | 0.105            | 1.39 [0.33-5.82]           | 0.656        |
| <b>Cephalopelvic Disproportion <sup>a</sup></b>           |                        |                           |                          |                  |                            |              |
| No                                                        | 151 (100.00)           | 1,501 (99.73)             |                          |                  |                            |              |
| Yes                                                       | 0 (0.00)               | 4 (0.27)                  |                          |                  |                            |              |
| <b>Prolapsed Cord <sup>a</sup></b>                        |                        |                           |                          |                  |                            |              |
| No                                                        | 148 (98.01)            | 1,495 (99.34)             |                          |                  |                            |              |

|                                                             |             |               |                          |                  |                          |                  |
|-------------------------------------------------------------|-------------|---------------|--------------------------|------------------|--------------------------|------------------|
| Yes                                                         | 3 (1.99)    | 10 (0.66)     |                          |                  |                          |                  |
| <b>Precipitate Delivery <sup>a</sup></b>                    |             |               |                          |                  |                          |                  |
| No                                                          | 149 (98.68) | 1,481 (98.41) |                          |                  |                          |                  |
| Yes                                                         | 2 (1.32)    | 24 (1.59)     |                          |                  |                          |                  |
| <b>PPH ≥500mls</b>                                          |             |               |                          |                  |                          |                  |
| No                                                          | 96 (63.58)  | 1,103 (73.29) | 1 [referent]             |                  | 1 [referent]             |                  |
| Yes                                                         | 55 (36.42)  | 402 (26.71)   | <b>2.61 [1.14-5.97]</b>  | <b>0.023</b>     | 1.42 [0.54-3.76]         | 0.477            |
| <b>TSR ≥2mins</b>                                           |             |               |                          |                  |                          |                  |
| No                                                          | 119 (78.81) | 1,305 (86.71) | 1 [referent]             |                  | 1 [referent]             |                  |
| Yes                                                         | 32 (21.19)  | 200 (13.29)   | 1.76 [0.80-3.89]         | 0.161            | 0.80 [0.26-2.46]         | 0.697            |
| <b>Apgar 5-minutes &lt;7 <sup>a</sup></b>                   |             |               |                          |                  |                          |                  |
| No                                                          | 147 (97.35) | 1,476 (98.07) |                          |                  |                          |                  |
| Yes                                                         | 4 (2.65)    | 29 (1.93)     |                          |                  |                          |                  |
| <b>Intubation</b>                                           |             |               |                          |                  |                          |                  |
| No                                                          | 112 (74.17) | 1,277 (84.85) | 1 [referent]             |                  | 1 [referent]             |                  |
| Yes                                                         | 39 (25.83)  | 228 (15.15)   | 2.31 [1.00-5.33]         | 0.051            | 2.48 [0.86-7.20]         | 0.093            |
| <b>Early Preterm Birth</b>                                  |             |               |                          |                  |                          |                  |
| No                                                          | 123 (81.46) | 1,287 (85.51) | 1 [referent]             |                  | 1 [referent]             |                  |
| Yes                                                         | 28 (18.54)  | 218 (14.49)   | 1.64 [0.59-4.57]         | 0.345            | 0.68 [0.20-2.27]         | 0.525            |
| <b>POBW &lt;15<sup>th</sup> Percentile</b>                  |             |               |                          |                  |                          |                  |
| No                                                          | 114 (75.5)  | 1,117 (74.22) | 1 [referent]             |                  | 1 [referent]             |                  |
| Yes                                                         | 23 (15.23)  | 194 (12.89)   | 1.51 [0.65-3.54]         | 0.341            | 1.65 [0.63-4.30]         | 0.304            |
| Unavailable                                                 | 14 (9.27)   | 194 (12.89)   |                          |                  |                          |                  |
| <b>Parity</b>                                               |             |               |                          |                  |                          |                  |
| 0                                                           | 58 (38.41)  | 604 (40.13)   | 1 [referent]             |                  | 1 [referent]             |                  |
| 1                                                           | 49 (32.45)  | 534 (35.48)   | 1.06 [0.44-2.56]         | 0.906            | 0.87 [0.25-3.08]         | 0.827            |
| ≥2                                                          | 44 (29.14)  | 367 (24.39)   | 1.73 [0.67-4.50]         | 0.259            | 2.02 [0.35-11.63]        | 0.432            |
|                                                             |             |               | Overall p-value          | 0.481            | Overall p-value          | 0.554            |
| <b>Child</b>                                                |             |               |                          |                  |                          |                  |
| <b>Sex</b>                                                  |             |               |                          |                  |                          |                  |
| Female                                                      | 51 (33.77)  | 799 (53.09)   | 1 [referent]             |                  | 1 [referent]             |                  |
| Male                                                        | 100 (66.23) | 706 (46.91)   | <b>5.21 [2.58-10.52]</b> | <b>&lt;0.001</b> | <b>5.35 [2.38-12.00]</b> | <b>&lt;0.001</b> |
| <b>Ethnicity</b>                                            |             |               |                          |                  |                          |                  |
| Other                                                       | 137 (90.73) | 1,435 (95.35) | 1 [referent]             |                  | 1 [referent]             |                  |
| Indigenous Australian                                       | 14 (9.27)   | 70 (4.65)     | 3.96 [0.86-18.29]        | 0.078            | 2.43 [0.36-16.63]        | 0.364            |
| <b>Child Speaks Language Other Than English at Home</b>     |             |               |                          |                  |                          |                  |
| No                                                          | 139 (92.05) | 1,377 (91.50) | 1 [referent]             |                  | 1 [referent]             |                  |
| Yes                                                         | 12 (7.95)   | 128 (8.50)    | 0.67 [0.17-2.62]         | 0.567            | 1.13 [0.24-5.18]         | 0.880            |
| <b>Age Category at Time of AEDC Completion <sup>b</sup></b> |             |               |                          |                  |                          |                  |
| 1                                                           | 40 (26.49)  | 281 (18.67)   | 2.42 [0.98-5.94]         | 0.055            | <b>2.84 [1.05-7.73]</b>  | <b>0.041</b>     |
| 2                                                           | 98 (64.9)   | 1,101 (73.16) | 1 [referent]             |                  | 1 [referent]             |                  |
| 3                                                           | 13 (8.61)   | 123 (8.17)    | 1.73 [0.46-6.48]         | 0.417            | 0.51 [0.09-2.75]         | 0.431            |
|                                                             |             |               | Overall p-value          | 0.145            | Overall p-value          | 0.065            |
| <b>Total Number of Siblings</b>                             |             |               |                          |                  |                          |                  |
| 1                                                           | 41 (27.15)  | 467 (31.03)   | 1 [referent]             |                  | 1 [referent]             |                  |
| 2                                                           | 57 (37.75)  | 597 (39.67)   | 1.27 [0.50-3.23]         | 0.613            | 1.97 [0.52-7.49]         | 0.322            |
| 3                                                           | 27 (17.88)  | 287 (19.07)   | 1.27 [0.41-3.91]         | 0.678            | 0.91 [0.16-5.21]         | 0.915            |
| >3                                                          | 26 (17.22)  | 154 (10.23)   | <b>4.06 [1.14-14.39]</b> | <b>0.030</b>     | 2.53 [0.33-19.66]        | 0.374            |
|                                                             |             |               | Overall p-value          | 0.172            | Overall p-value          | 0.417            |
| <b>Sociodemographic</b>                                     |             |               |                          |                  |                          |                  |
| <b>Index of Relative Socioeconomic Disadvantage</b>         |             |               |                          |                  |                          |                  |
| Lowest Quintile                                             | 118 (78.15) | 1,255 (83.39) | 1.67 [0.59-4.74]         | 0.336            | 0.72 [0.21-2.45]         | 0.596            |
| > Lowest Quintile                                           | 26 (17.22)  | 211 (14.02)   | 1 [referent]             |                  | 1 [referent]             |                  |
| Unavailable                                                 | 7 (4.64)    | 39 (2.59)     |                          |                  |                          |                  |

<sup>a</sup> Excluded from multivariable analysis due to small N.

<sup>b</sup> Age categories classified as; 1) ≥3 years 10 months to <5 years and one month, 2) ≥5 years and one month to <5 years and 10 months (reference category), 3) ≥5 years and 10 months to <6 years 10 months.

Table 3. Risk Factors for Developmental Vulnerability on the Emotional Maturity Domain.

| Characteristic                                            | DV<br>(N=147)<br>N (%) | NDV<br>(N=1,509)<br>N (%) | Bivariate               |                  | Multivariable<br>(N=1,352) |              |
|-----------------------------------------------------------|------------------------|---------------------------|-------------------------|------------------|----------------------------|--------------|
|                                                           |                        |                           | OR [95% CI]             | p-value          | aOR [95% CI]               | p-value      |
| <b>Maternal</b>                                           |                        |                           |                         |                  |                            |              |
| <b>Age at Time of Child's Birth (years)</b>               |                        |                           |                         |                  |                            |              |
| <25                                                       | 39 (26.53)             | 183 (12.13)               | <b>3.14 [1.44-6.89]</b> | <b>0.004</b>     | 1.89 [0.70-5.05]           | 0.206        |
| 25-29                                                     | 31 (21.09)             | 353 (23.39)               | 1 [referent]            |                  | 1 [referent]               |              |
| 30-34                                                     | 38 (25.85)             | 568 (37.64)               | 0.70 [0.35-1.40]        | 0.311            | 1.03 [0.46-2.34]           | 0.937        |
| ≥35                                                       | 39 (26.53)             | 405 (26.84)               | 1.12 [0.55-2.27]        | 0.762            | 1.16 [0.48-2.81]           | 0.742        |
|                                                           |                        |                           | Overall p-value         | <b>0.001</b>     | Overall p-value            | 0.611        |
| <b>Marital Status</b>                                     |                        |                           |                         |                  |                            |              |
| Married (inc. de facto)                                   | 111 (75.51)            | 1,369 (90.72)             | 1 [referent]            |                  | 1 [referent]               |              |
| All Other                                                 | 34 (23.13)             | 136 (9.01)                | <b>4.58 [2.26-9.27]</b> | <b>&lt;0.001</b> | <b>3.77 [1.48-9.58]</b>    | <b>0.006</b> |
| Unavailable                                               | 2 (1.36)               | 4 (0.27)                  |                         |                  |                            |              |
| <b>Occupational Status Scale at Time of Child's Birth</b> |                        |                           |                         |                  |                            |              |
| 0-20                                                      | 45 (30.61)             | 264 (17.50)               | <b>2.62 [1.46-4.72]</b> | <b>0.001</b>     | 1.85 [0.86-3.97]           | 0.113        |
| >20-100                                                   | 95 (64.63)             | 1,190 (78.86)             | 1 [referent]            |                  | 1 [referent]               |              |
| Unavailable                                               | 7 (4.76)               | 55 (3.64)                 |                         |                  |                            |              |
| <b>Pregnancy &amp; Birth</b>                              |                        |                           |                         |                  |                            |              |
| <b>Fertility Treatments</b>                               |                        |                           |                         |                  |                            |              |
| No                                                        | 126 (85.71)            | 1,262 (83.63)             | 1 [referent]            |                  | 1 [referent]               |              |
| Yes                                                       | 21 (14.29)             | 247 (16.37)               | 0.81 [0.40-1.66]        | 0.567            | 1.03 [0.42-2.53]           | 0.957        |
| <b>Smoking Status During Pregnancy</b>                    |                        |                           |                         |                  |                            |              |
| No                                                        | 118 (80.27)            | 1,300 (86.15)             | 1 [referent]            |                  | 1 [referent]               |              |
| Yes                                                       | 29 (19.73)             | 209 (13.85)               | 1.70 [0.86-3.36]        | 0.130            | 0.82 [0.33-2.02]           | 0.662        |
| <b>Pre-eclampsia</b>                                      |                        |                           |                         |                  |                            |              |
| No                                                        | 129 (87.76)            | 1,331 (88.20)             | 1 [referent]            |                  | 1 [referent]               |              |
| Yes                                                       | 18 (12.24)             | 178 (11.80)               | 1.09 [0.50-2.40]        | 0.827            | 1.87 [0.75-4.63]           | 0.176        |
| <b>Gestational Diabetes</b>                               |                        |                           |                         |                  |                            |              |
| No                                                        | 138 (93.88)            | 1,416 (93.84)             | 1 [referent]            |                  | 1 [referent]               |              |
| Yes                                                       | 9 (6.12)               | 93 (6.16)                 | 1.02 [0.35-2.97]        | 0.975            | 1.18 [0.37-3.76]           | 0.785        |
| <b>Threatened Abortion</b>                                |                        |                           |                         |                  |                            |              |
| No                                                        | 140 (95.24)            | 1,432 (94.90)             | 1 [referent]            |                  | 1 [referent]               |              |
| Yes                                                       | 7 (4.76)               | 77 (5.10)                 | 0.91 [0.28-3.03]        | 0.882            | 0.09 [0.01-1.06]           | 0.055        |
| <b>Other Pregnancy Related Complications</b>              |                        |                           |                         |                  |                            |              |
| No                                                        | 35 (23.81)             | 541 (35.85)               | 1 [referent]            |                  | 1 [referent]               |              |
| Yes                                                       | 112 (76.19)            | 968 (64.15)               | <b>2.13 [1.20-3.80]</b> | <b>0.010</b>     | 1.80 [0.86-3.78]           | 0.121        |
| <b>Threatened Preterm Labour</b>                          |                        |                           |                         |                  |                            |              |
| No                                                        | 125 (85.03)            | 1,339 (88.73)             | 1 [referent]            |                  | 1 [referent]               |              |
| Yes                                                       | 22 (14.97)             | 170 (11.27)               | 1.52 [0.72-3.25]        | 0.274            | 1.21 [0.51-2.85]           | 0.664        |
| <b>APH</b>                                                |                        |                           |                         |                  |                            |              |
| No                                                        | 139 (94.56)            | 1,459 (96.69)             | 1 [referent]            |                  | 1 [referent]               |              |
| Yes                                                       | 8 (5.44)               | 50 (3.31)                 | 2.13 [0.62-7.31]        | 0.230            | 0.67 [0.13-3.31]           | 0.618        |
| <b>Placenta Praevia <sup>a</sup></b>                      |                        |                           |                         |                  |                            |              |
| No                                                        | 146 (99.32)            | 1,500 (99.40)             |                         |                  |                            |              |
| Yes                                                       | 1 (0.68)               | 9 (0.60)                  |                         |                  |                            |              |
| <b>Placental Abruption <sup>a</sup></b>                   |                        |                           |                         |                  |                            |              |
| No                                                        | 145 (98.64)            | 1,505 (99.73)             |                         |                  |                            |              |
| Yes                                                       | 2 (1.36)               | 4 (0.27)                  |                         |                  |                            |              |
| <b>Fetal Distress</b>                                     |                        |                           |                         |                  |                            |              |
| No                                                        | 128 (87.07)            | 1,390 (92.11)             | 1 [referent]            |                  | 1 [referent]               |              |
| Yes                                                       | 19 (12.93)             | 119 (7.89)                | 1.95 [0.86-4.44]        | 0.111            | 1.09 [0.40-2.93]           | 0.869        |
| <b>Cephalopelvic Disproportion <sup>a</sup></b>           |                        |                           |                         |                  |                            |              |
| No                                                        | 147 (100.00)           | 1,505 (99.73)             |                         |                  |                            |              |
| Yes                                                       | 0 (0.00)               | 4 (0.27)                  |                         |                  |                            |              |
| <b>Prolapsed Cord <sup>a</sup></b>                        |                        |                           |                         |                  |                            |              |
| No                                                        | 145 (98.64)            | 1,498 (99.27)             |                         |                  |                            |              |

|                                                             |             |               |                           |                  |                          |                  |
|-------------------------------------------------------------|-------------|---------------|---------------------------|------------------|--------------------------|------------------|
| Yes                                                         | 2 (1.36)    | 11 (0.73)     |                           |                  |                          |                  |
| <b>Precipitate Delivery <sup>a</sup></b>                    |             |               |                           |                  |                          |                  |
| No                                                          | 146 (99.32) | 1,484 (98.34) |                           |                  |                          |                  |
| Yes                                                         | 1 (0.68)    | 25 (1.66)     |                           |                  |                          |                  |
| <b>PPH ≥500mls</b>                                          |             |               |                           |                  |                          |                  |
| No                                                          | 95 (64.63)  | 1,104 (73.16) | 1 [referent]              |                  | 1 [referent]             |                  |
| Yes                                                         | 52 (35.37)  | 405 (26.84)   | <b>1.75 [1.01-3.05]</b>   | <b>0.047</b>     | 1.03 [0.52-2.03]         | 0.932            |
| <b>TSR ≥2mins</b>                                           |             |               |                           |                  |                          |                  |
| No                                                          | 119 (80.95) | 1,305 (86.48) | 1 [referent]              |                  | 1 [referent]             |                  |
| Yes                                                         | 28 (19.05)  | 204 (13.52)   | 1.69 [0.91-3.15]          | 0.096            | 1.12 [0.45-2.74]         | 0.812            |
| <b>Apgar 5-minutes &lt;7 <sup>a</sup></b>                   |             |               |                           |                  |                          |                  |
| No                                                          | 143 (97.28) | 1,480 (98.08) |                           |                  |                          |                  |
| Yes                                                         | 4 (2.72)    | 29 (1.92)     |                           |                  |                          |                  |
| <b>Intubation</b>                                           |             |               |                           |                  |                          |                  |
| No                                                          | 114 (77.55) | 1,275 (84.49) | 1 [referent]              |                  | 1 [referent]             |                  |
| Yes                                                         | 33 (22.45)  | 234 (15.51)   | 1.78 [0.98-3.21]          | 0.057            | 1.48 [0.63-3.49]         | 0.366            |
| <b>Early Preterm Birth</b>                                  |             |               |                           |                  |                          |                  |
| No                                                          | 119 (80.95) | 1,291 (85.55) | 1 [referent]              |                  | 1 [referent]             |                  |
| Yes                                                         | 28 (19.05)  | 218 (14.45)   | 1.51 [0.76-3.00]          | 0.237            | 0.95 [0.42-2.13]         | 0.897            |
| <b>POBW &lt;15<sup>th</sup> Percentile</b>                  |             |               |                           |                  |                          |                  |
| No                                                          | 106 (72.11) | 1,125 (74.55) | 1 [referent]              |                  | 1 [referent]             |                  |
| Yes                                                         | 24 (16.33)  | 193 (12.79)   | 1.48 [0.76-2.87]          | 0.252            | 1.59 [0.77-3.30]         | 0.210            |
| Unavailable                                                 | 17 (11.56)  | 191 (12.66)   |                           |                  |                          |                  |
| <b>Parity</b>                                               |             |               |                           |                  |                          |                  |
| 0                                                           | 61 (41.5)   | 601 (39.83)   | 1 [referent]              |                  | 1 [referent]             |                  |
| 1                                                           | 52 (35.37)  | 531 (35.19)   | 0.99 [0.55-1.78]          | 0.968            | 0.86 [0.36-2.03]         | 0.723            |
| ≥2                                                          | 34 (23.13)  | 377 (24.98)   | 0.89 [0.46-1.72]          | 0.727            | 0.84 [0.24-2.95]         | 0.786            |
|                                                             |             |               | Overall p-value           | 0.934            | Overall p-value          | 0.935            |
| <b>Child</b>                                                |             |               |                           |                  |                          |                  |
| <b>Sex</b>                                                  |             |               |                           |                  |                          |                  |
| Female                                                      | 32 (21.77)  | 818 (54.21)   | 1 [referent]              |                  | 1 [referent]             |                  |
| Male                                                        | 115 (78.23) | 691 (45.79)   | <b>10.13 [4.94-20.79]</b> | <b>&lt;0.001</b> | <b>9.37 [4.42-19.87]</b> | <b>&lt;0.001</b> |
| <b>Ethnicity</b>                                            |             |               |                           |                  |                          |                  |
| Other                                                       | 131 (89.12) | 1,441 (95.49) | 1 [referent]              |                  | 1 [referent]             |                  |
| Indigenous Australian                                       | 16 (10.88)  | 68 (4.51)     | <b>3.62 [1.36-9.62]</b>   | <b>0.010</b>     | <b>5.61 [1.48-21.31]</b> | <b>0.012</b>     |
| <b>Child Speaks Language Other Than English at Home</b>     |             |               |                           |                  |                          |                  |
| No                                                          | 135 (91.84) | 1,381 (91.52) | 1 [referent]              |                  | 1 [referent]             |                  |
| Yes                                                         | 12 (8.16)   | 128 (8.48)    | 1.00 [0.40-2.49]          | 0.994            | 1.02 [0.34-3.04]         | 0.975            |
| <b>Age Category at Time of AEDC Completion <sup>b</sup></b> |             |               |                           |                  |                          |                  |
| 1                                                           | 37 (25.17)  | 284 (18.82)   | 1.57 [0.85-2.90]          | 0.148            | 1.38 [0.68-2.80]         | 0.377            |
| 2                                                           | 102 (69.39) | 1,097 (72.7)  | 1 [referent]              |                  | 1 [referent]             |                  |
| 3                                                           | 8 (5.44)    | 128 (8.48)    | 0.62 [0.22-1.77]          | 0.372            | 0.31 [0.08-1.17]         | 0.085            |
|                                                             |             |               | Overall p-value           | 0.187            | Overall p-value          | 0.122            |
| <b>Total Number of Siblings</b>                             |             |               |                           |                  |                          |                  |
| 1                                                           | 45 (30.61)  | 463 (30.68)   | 1 [referent]              |                  | 1 [referent]             |                  |
| 2                                                           | 59 (40.14)  | 595 (39.43)   | 1.05 [0.57-1.95]          | 0.873            | 1.72 [0.69-4.25]         | 0.241            |
| 3                                                           | 22 (14.97)  | 292 (19.35)   | 0.71 [0.32-1.57]          | 0.400            | 0.95 [0.28-3.24]         | 0.935            |
| >3                                                          | 21 (14.29)  | 159 (10.54)   | 1.62 [0.69-3.80]          | 0.270            | 1.93 [0.46-8.19]         | 0.370            |
|                                                             |             |               | Overall p-value           | 0.423            | Overall p-value          | 0.356            |
| <b>Sociodemographic</b>                                     |             |               |                           |                  |                          |                  |
| <b>Index of Relative Socioeconomic Disadvantage</b>         |             |               |                           |                  |                          |                  |
| Lowest Quintile                                             | 118 (80.27) | 1,255 (83.17) | 1.08 [0.54-2.17]          | 0.835            | 0.58 [0.24-1.43]         | 0.238            |
| > Lowest Quintile                                           | 22 (14.97)  | 215 (14.25)   | 1 [referent]              |                  | 1 [referent]             |                  |
| Unavailable                                                 | 7 (4.76)    | 39 (2.58)     |                           |                  |                          |                  |

<sup>a</sup> Excluded from multivariable analysis due to small N.

<sup>b</sup> Age categories classified as; 1) ≥3 years 10 months to <5 years and one month, 2) ≥5 years and one month to <5 years and 10 months (reference category), 3) ≥5 years and 10 months to <6 years 10 months.

Table 4. Risk Factors for Developmental Vulnerability on the Language &amp; Cognitive Skills (school-based) Domain.

| Characteristic                                            | DV<br>(N=195)<br>N (%) | NDV<br>(N=1,461)<br>N (%) | Bivariate                 |                  | Multivariable<br>(N=1,352) |              |
|-----------------------------------------------------------|------------------------|---------------------------|---------------------------|------------------|----------------------------|--------------|
|                                                           |                        |                           | OR [95% CI]               | p-value          | aOR [95% CI]               | p-value      |
| <b>Maternal</b>                                           |                        |                           |                           |                  |                            |              |
| <b>Age at Time of Child's Birth (years)</b>               |                        |                           |                           |                  |                            |              |
| <25                                                       | 68 (34.87)             | 154 (10.54)               | <b>18.41 [5.21-65.05]</b> | <b>&lt;0.001</b> | <b>12.90 [2.81-59.16]</b>  | <b>0.001</b> |
| 25-29                                                     | 38 (19.49)             | 346 (23.68)               | 1 [referent]              |                  | 1 [referent]               |              |
| 30-34                                                     | 52 (26.67)             | 554 (37.92)               | 0.72 [0.25-2.02]          | 0.528            | 0.80 [0.24-2.67]           | 0.716        |
| ≥35                                                       | 37 (18.97)             | 407 (27.86)               | 0.70 [0.23-2.13]          | 0.528            | 0.98 [0.27-3.57]           | 0.970        |
|                                                           |                        |                           | Overall p-value           | <b>&lt;0.001</b> | Overall p-value            | <b>0.003</b> |
| <b>Marital Status</b>                                     |                        |                           |                           |                  |                            |              |
| Married (inc. de facto)                                   | 145 (74.36)            | 1,335 (91.38)             | 1 [referent]              |                  | 1 [referent]               |              |
| All Other                                                 | 50 (25.64)             | 120 (8.21)                | <b>18.44 [5.70-59.63]</b> | <b>&lt;0.001</b> | <b>5.92 [1.43-24.59]</b>   | <b>0.014</b> |
| Unavailable                                               | 0 (0.00)               | 6 (0.41)                  |                           |                  |                            |              |
| <b>Occupational Status Scale at Time of Child's Birth</b> |                        |                           |                           |                  |                            |              |
| 0-20                                                      | 70 (35.90)             | 239 (16.36)               | <b>12.68 [4.58-35.09]</b> | <b>&lt;0.001</b> | <b>3.61 [1.19-10.95]</b>   | <b>0.024</b> |
| >80-100                                                   | 105 (53.85)            | 1,180 (80.77)             | 1 [referent]              |                  | 1 [referent]               |              |
| Unavailable                                               | 20 (10.26)             | 42 (2.87)                 |                           |                  |                            |              |
| <b>Pregnancy &amp; Birth</b>                              |                        |                           |                           |                  |                            |              |
| <b>Fertility Treatments</b>                               |                        |                           |                           |                  |                            |              |
| No                                                        | 180 (92.31)            | 1,208 (82.68)             | 1 [referent]              |                  | 1 [referent]               |              |
| Yes                                                       | 15 (7.69)              | 253 (17.32)               | 0.16 [0.04-0.55]          | 0.004            | 0.42 [0.09-1.95]           | 0.264        |
| <b>Smoking Status During Pregnancy</b>                    |                        |                           |                           |                  |                            |              |
| No                                                        | 145 (74.36)            | 1,273 (87.13)             | 1 [referent]              |                  | 1 [referent]               |              |
| Yes                                                       | 50 (25.64)             | 188 (12.87)               | <b>6.35 [2.24-18.01]</b>  | <b>&lt;0.001</b> | <b>0.28 [0.07-1.09]</b>    | <b>0.066</b> |
| <b>Pre-eclampsia</b>                                      |                        |                           |                           |                  |                            |              |
| No                                                        | 176 (90.26)            | 1,284 (87.89)             | 1 [referent]              |                  | 1 [referent]               |              |
| Yes                                                       | 19 (9.74)              | 177 (12.11)               | 0.61 [0.18-2.10]          | 0.434            | 1.09 [0.26-4.60]           | 0.908        |
| <b>Gestational Diabetes</b>                               |                        |                           |                           |                  |                            |              |
| No                                                        | 184 (94.36)            | 1,370 (93.77)             | 1 [referent]              |                  | 1 [referent]               |              |
| Yes                                                       | 11 (5.64)              | 91 (6.23)                 | 0.84 [0.16-4.44]          | 0.836            | 0.66 [0.11-4.01]           | 0.651        |
| <b>Threatened Abortion</b>                                |                        |                           |                           |                  |                            |              |
| No                                                        | 189 (96.92)            | 1,383 (94.66)             | 1 [referent]              |                  | 1 [referent]               |              |
| Yes                                                       | 6 (3.08)               | 78 (5.34)                 | 0.36 [0.05-2.41]          | 0.291            | 0.20 [0.01-3.32]           | 0.258        |
| <b>Other Pregnancy Related Complications</b>              |                        |                           |                           |                  |                            |              |
| No                                                        | 53 (27.18)             | 523 (35.80)               | 1 [referent]              |                  | 1 [referent]               |              |
| Yes                                                       | 142 (72.82)            | 938 (64.20)               | 1.96 [0.84-4.54]          | 0.119            | 1.29 [0.45-3.71]           | 0.635        |
| <b>Threatened Preterm Labour</b>                          |                        |                           |                           |                  |                            |              |
| No                                                        | 162 (83.08)            | 1,302 (89.12)             | 1 [referent]              |                  | 1 [referent]               |              |
| Yes                                                       | 33 (16.92)             | 159 (10.88)               | 3.21 [0.80-12.92]         | 0.100            | 1.20 [0.32-4.48]           | 0.782        |
| <b>APH</b>                                                |                        |                           |                           |                  |                            |              |
| No                                                        | 183 (93.85)            | 1,415 (96.85)             | 1 [referent]              |                  | 1 [referent]               |              |
| Yes                                                       | 12 (6.15)              | 46 (3.15)                 | 6.80 [0.62-74.13]         | 0.116            | 4.92 [0.62-39.01]          | 0.131        |
| <b>Placenta Praevia</b>                                   |                        |                           |                           |                  |                            |              |
| No                                                        | 195 (100.00)           | 1,451 (99.32)             |                           |                  |                            |              |
| Yes                                                       | 0 (0.00)               | 10 (0.68)                 |                           |                  |                            |              |
| <b>Placental Abruption</b>                                |                        |                           |                           |                  |                            |              |
| No                                                        | 195 (100.00)           | 1,455 (99.59)             |                           |                  |                            |              |
| Yes                                                       | 0 (0.00)               | 6 (0.41)                  |                           |                  |                            |              |
| <b>Fetal Distress</b>                                     |                        |                           |                           |                  |                            |              |
| No                                                        | 173 (88.72)            | 1,345 (92.06)             | 1 [referent]              |                  | 1 [referent]               |              |
| Yes                                                       | 22 (11.28)             | 116 (7.94)                | 2.04 [0.45-9.17]          | 0.353            | 0.56 [0.11-2.76]           | 0.475        |
| <b>Cephalopelvic Disproportion<sup>a</sup></b>            |                        |                           |                           |                  |                            |              |
| No                                                        | 195 (100.00)           | 1,457 (99.73)             |                           |                  |                            |              |
| Yes                                                       | 0 (0.00)               | 4 (0.27)                  |                           |                  |                            |              |
| <b>Prolapsed Cord<sup>a</sup></b>                         |                        |                           |                           |                  |                            |              |



|                                                            |             |               |                            |                  |                          |              |
|------------------------------------------------------------|-------------|---------------|----------------------------|------------------|--------------------------|--------------|
| No                                                         | 192 (98.46) | 1,451 (99.32) |                            |                  |                          |              |
| Yes                                                        | 3 (1.54)    | 10 (0.68)     |                            |                  |                          |              |
| <b>Precipitate Delivery<sup>a</sup></b>                    |             |               |                            |                  |                          |              |
| No                                                         | 190 (97.44) | 1,440 (98.56) |                            |                  |                          |              |
| Yes                                                        | 5 (2.56)    | 21 (1.44)     |                            |                  |                          |              |
| <b>PPH ≥500mls</b>                                         |             |               |                            |                  |                          |              |
| No                                                         | 123 (63.08) | 1,076 (73.65) | 1 [referent]               |                  | 1 [referent]             |              |
| Yes                                                        | 72 (36.92)  | 385 (26.35)   | <b>3.13 [1.22-8.05]</b>    | <b>0.018</b>     | 1.84 [0.67-5.03]         | 0.237        |
| <b>TSR ≥2mins</b>                                          |             |               |                            |                  |                          |              |
| No                                                         | 163 (83.59) | 1,261 (86.31) | 1 [referent]               |                  | 1 [referent]             |              |
| Yes                                                        | 32 (16.41)  | 200 (13.69)   | 0.95 [0.39-2.30]           | 0.908            | 0.62 [0.20-1.91]         | 0.399        |
| <b>Apgar 5-minutes &lt;7<sup>a</sup></b>                   |             |               |                            |                  |                          |              |
| No                                                         | 193 (98.97) | 1,430 (97.88) |                            |                  |                          |              |
| Yes                                                        | 2 (1.03)    | 31 (2.12)     |                            |                  |                          |              |
| <b>Intubation</b>                                          |             |               |                            |                  |                          |              |
| No                                                         | 159 (81.54) | 1,230 (84.19) | 1 [referent]               |                  | 1 [referent]             |              |
| Yes                                                        | 36 (18.46)  | 231 (15.81)   | 1.13 [0.49-2.58]           | 0.779            | 1.68 [0.59-4.81]         | 0.333        |
| <b>Early Preterm Birth</b>                                 |             |               |                            |                  |                          |              |
| No                                                         | 155 (79.49) | 1,255 (85.90) | 1 [referent]               |                  | 1 [referent]             |              |
| Yes                                                        | 40 (20.51)  | 206 (14.10)   | 2.57 [0.75-8.80]           | 0.133            | 0.79 [0.23-2.80]         | 0.720        |
| <b>POBW &lt;15<sup>th</sup> Percentile</b>                 |             |               |                            |                  |                          |              |
| No                                                         | 142 (72.82) | 1,089 (74.54) | 1 [referent]               |                  | 1 [referent]             |              |
| Yes                                                        | 36 (18.46)  | 181 (12.39)   | 1.62 [0.72-3.66]           | 0.246            | 1.74 [0.71-4.25]         | 0.222        |
| Unavailable                                                | 17 (8.72)   | 191 (13.07)   |                            |                  |                          |              |
| <b>Parity</b>                                              |             |               |                            |                  |                          |              |
| 0                                                          | 51 (26.15)  | 611 (41.82)   | 1 [referent]               |                  | 1 [referent]             |              |
| 1                                                          | 81 (41.54)  | 502 (34.36)   | <b>4.67 [1.71-12.70]</b>   | <b>0.003</b>     | <b>5.12 [1.25-20.99]</b> | <b>0.023</b> |
| ≥2                                                         | 63 (32.31)  | 348 (23.82)   | <b>6.18 [2.09-18.27]</b>   | <b>0.001</b>     | 6.37 [1.00-40.66]        | <b>0.050</b> |
|                                                            |             |               | Overall p-value            | <b>0.002</b>     | Overall p-value          | <b>0.060</b> |
| <b>Child</b>                                               |             |               |                            |                  |                          |              |
| <b>Sex</b>                                                 |             |               |                            |                  |                          |              |
| Female                                                     | 85 (43.59)  | 765 (52.36)   | 1 [referent]               |                  | 1 [referent]             |              |
| Male                                                       | 110 (56.41) | 696 (47.64)   | <b>3.03 [1.60-5.71]</b>    | <b>&lt;0.001</b> | <b>3.57 [1.66-7.65]</b>  | <b>0.001</b> |
| <b>Ethnicity</b>                                           |             |               |                            |                  |                          |              |
| Other                                                      | 165 (84.62) | 1,407 (96.30) | 1 [referent]               |                  | 1 [referent]             |              |
| Indigenous Australian                                      | 30 (15.38)  | 54 (3.70)     | <b>34.27 [7.49-156.82]</b> | <b>&lt;0.001</b> | 2.22 [0.32-15.52]        | 0.420        |
| <b>Child Speaks Language Other Than English at Home</b>    |             |               |                            |                  |                          |              |
| No                                                         | 167 (85.64) | 1,349 (92.33) | 1 [referent]               |                  | 1 [referent]             |              |
| Yes                                                        | 28 (14.36)  | 112 (7.67)    | 3.82 [0.89-16.47]          | 0.072            | 2.14 [0.49-9.35]         | 0.313        |
| <b>Age Category at Time of AEDC Completion<sup>b</sup></b> |             |               |                            |                  |                          |              |
| 1                                                          | 48 (24.62)  | 273 (18.69)   | 2.09 [0.74-5.89]           | 0.164            | 2.18 [0.77-6.16]         | 0.140        |
| 2                                                          | 128 (65.64) | 1,071 (73.31) | 1 [referent]               |                  | 1 [referent]             |              |
| 3                                                          | 19 (9.74)   | 117 (8.01)    | 2.56 [0.56-11.82]          | 0.227            | 1.06 [0.22-5.19]         | 0.943        |
|                                                            |             |               | Overall p-value            | 0.234            | Overall p-value          | 0.329        |
| <b>Total Number of Siblings</b>                            |             |               |                            |                  |                          |              |
| 1                                                          | 41 (21.03)  | 467 (31.96)   | 1 [referent]               |                  | 1 [referent]             |              |
| 2                                                          | 79 (40.51)  | 575 (39.36)   | <b>2.82 [1.01-7.88]</b>    | <b>0.048</b>     | 0.63 [0.15-2.60]         | 0.523        |
| 3                                                          | 35 (17.95)  | 279 (19.10)   | 2.40 [0.71-8.13]           | 0.160            | 0.23 [0.04-1.40]         | 0.110        |
| >3                                                         | 40 (20.51)  | 140 (9.58)    | <b>17.34 [4.37-68.74]</b>  | <b>&lt;0.001</b> | 2.14 [0.29-15.84]        | 0.455        |
|                                                            |             |               | Overall p-value            | <b>&lt;0.001</b> | Overall p-value          | <b>0.044</b> |
| <b>Sociodemographic</b>                                    |             |               |                            |                  |                          |              |
| <b>Index of Relative Socioeconomic Disadvantage</b>        |             |               |                            |                  |                          |              |
| Lowest Quintile                                            | 141 (72.31) | 1,232 (84.33) | <b>6.87 [1.80-26.28]</b>   | <b>0.005</b>     | 1.52 [0.47-4.94]         | 0.486        |
| > Lowest Quintile                                          | 46 (23.59)  | 191 (13.07)   | 1 [referent]               |                  | 1 [referent]             |              |
| Unavailable                                                | 8 (4.10)    | 38 (2.60)     |                            |                  |                          |              |

<sup>a</sup> Excluded from multivariable analysis due to small N.

<sup>b</sup> Age categories classified as; 1) ≥3 years 10 months to <5 years and one month, 2) ≥5 years and one month to <5 years and 10 months (reference category), 3) ≥5 years and 10 months to <6 years 10 months.



Table 5. Risk Factors for Developmental Vulnerability on the Communication Skills &amp; General Knowledge Domain.

| Characteristic                                            | DV<br>(N=200)<br>N (%) | NDV<br>(N=1,456)<br>N (%) | Bivariate                 |                  | Multivariable<br>(N=1,352) |              |
|-----------------------------------------------------------|------------------------|---------------------------|---------------------------|------------------|----------------------------|--------------|
|                                                           |                        |                           | OR [95% CI]               | p-value          | aOR [95% CI]               | p-value      |
| <b>Maternal</b>                                           |                        |                           |                           |                  |                            |              |
| <b>Age at Time of Child's Birth (years)</b>               |                        |                           |                           |                  |                            |              |
| <25                                                       | 59 (29.50)             | 163 (11.20)               | <b>13.25 [3.50-50.17]</b> | <b>&lt;0.001</b> | <b>10.96 [2.24-53.75]</b>  | <b>0.003</b> |
| 25-29                                                     | 40 (20.00)             | 344 (23.63)               | 1 [referent]              |                  | 1 [referent]               |              |
| 30-34                                                     | 59 (29.50)             | 547 (37.57)               | 0.74 [0.24-2.28]          | 0.602            | 1.17 [0.33-4.09]           | 0.811        |
| ≥35                                                       | 42 (21.00)             | 402 (27.61)               | 0.75 [0.23-2.47]          | 0.632            | 1.34 [0.34-5.26]           | 0.675        |
|                                                           |                        |                           | Overall p-value           | <b>&lt;0.001</b> | Overall p-value            | <b>0.020</b> |
| <b>Marital Status</b>                                     |                        |                           |                           |                  |                            |              |
| Married (inc. de facto)                                   | 160 (80.00)            | 1,320 (90.66)             | 1 [referent]              |                  | 1 [referent]               |              |
| All Other                                                 | 40 (20.00)             | 130 (8.93)                | <b>14.40 [2.74-75.72]</b> | <b>0.002</b>     | 2.28 [0.52-10.04]          | 0.276        |
| Unavailable                                               | 0 (0.00)               | 6 (0.41)                  |                           |                  |                            |              |
| <b>Occupational Status Scale at Time of Child's Birth</b> |                        |                           |                           |                  |                            |              |
| 0-20                                                      | 68 (34.00)             | 241 (16.55)               | <b>11.20 [3.86-32.50]</b> | <b>&lt;0.001</b> | 2.11 [0.67-6.65]           | 0.203        |
| >20-100                                                   | 117 (58.50)            | 1,168 (80.22)             | 1 [referent]              |                  | 1 [referent]               |              |
| Unavailable                                               | 15 (7.50)              | 47 (3.23)                 |                           |                  |                            |              |
| <b>Pregnancy &amp; Birth</b>                              |                        |                           |                           |                  |                            |              |
| <b>Fertility Treatments</b>                               |                        |                           |                           |                  |                            |              |
| No                                                        | 188 (94.00)            | 1,200 (82.42)             | 1 [referent]              |                  | 1 [referent]               |              |
| Yes                                                       | 12 (6.00)              | 256 (17.58)               | <b>0.10 [0.02-0.39]</b>   | <b>&lt;0.001</b> | 0.32 [0.06-1.64]           | 0.172        |
| <b>Smoking Status During Pregnancy</b>                    |                        |                           |                           |                  |                            |              |
| No                                                        | 148 (74.00)            | 1,270 (87.23)             | 1 [referent]              |                  | 1 [referent]               |              |
| Yes                                                       | 52 (26.00)             | 186 (12.77)               | <b>7.79 [2.61-23.28]</b>  | <b>&lt;0.001</b> | 1.51 [0.42-5.45]           | 0.532        |
| <b>Pre-eclampsia</b>                                      |                        |                           |                           |                  |                            |              |
| No                                                        | 175 (87.50)            | 1,285 (88.26)             | 1 [referent]              |                  | 1 [referent]               |              |
| Yes                                                       | 25 (12.50)             | 171 (11.74)               | 1.07 [0.29-3.90]          | 0.924            | 0.95 [0.21-4.20]           | 0.944        |
| <b>Gestational Diabetes</b>                               |                        |                           |                           |                  |                            |              |
| No                                                        | 187 (93.50)            | 1,367 (93.89)             | 1 [referent]              |                  | 1 [referent]               |              |
| Yes                                                       | 13 (6.50)              | 89 (6.11)                 | 1.16 [0.20-6.72]          | 0.870            | 1.39 [0.23-8.50]           | 0.724        |
| <b>Threatened Abortion</b>                                |                        |                           |                           |                  |                            |              |
| No                                                        | 192 (96.00)            | 1,380 (94.78)             | 1 [referent]              |                  | 1 [referent]               |              |
| Yes                                                       | 8 (4.00)               | 76 (5.22)                 | 0.55 [0.09-3.48]          | 0.524            | 0.37 [0.02-5.73]           | 0.477        |
| <b>Other Pregnancy Related Complications</b>              |                        |                           |                           |                  |                            |              |
| No                                                        | 51 (25.50)             | 525 (36.06)               | 1 [referent]              |                  | 1 [referent]               |              |
| Yes                                                       | 149 (74.50)            | 931 (63.94)               | <b>2.53 [1.07-6.00]</b>   | <b>0.035</b>     | 1.61 [0.53-4.90]           | 0.404        |
| <b>Threatened Preterm Labour</b>                          |                        |                           |                           |                  |                            |              |
| No                                                        | 178 (89.00)            | 1,286 (88.32)             | 1 [referent]              |                  | 1 [referent]               |              |
| Yes                                                       | 22 (11.00)             | 170 (11.68)               | 1.00 [0.27-3.61]          | 0.994            | 0.45 [0.11-1.88]           | 0.272        |
| <b>APH</b>                                                |                        |                           |                           |                  |                            |              |
| No                                                        | 188 (94.00)            | 1,410 (96.84)             | 1 [referent]              |                  | 1 [referent]               |              |
| Yes                                                       | 12 (6.00)              | 46 (3.16)                 | 9.09 [0.70-117.63]        | 0.091            | 1.15 [0.12-11.44]          | 0.905        |
| <b>Placenta Praevia <sup>a</sup></b>                      |                        |                           |                           |                  |                            |              |
| No                                                        | 200 (100.00)           | 1,446 (99.31)             |                           |                  |                            |              |
| Yes                                                       | 0 (0.00)               | 10 (0.69)                 |                           |                  |                            |              |
| <b>Placental Abruption <sup>a</sup></b>                   |                        |                           |                           |                  |                            |              |
| No                                                        | 199 (99.50)            | 1,451 (99.66)             |                           |                  |                            |              |
| Yes                                                       | 1 (0.50)               | 5 (0.34)                  |                           |                  |                            |              |
| <b>Fetal Distress</b>                                     |                        |                           |                           |                  |                            |              |
| No                                                        | 172 (86.00)            | 1,346 (92.45)             | 1 [referent]              |                  | 1 [referent]               |              |
| Yes                                                       | 28 (14.00)             | 110 (7.55)                | 4.73 [1.00-22.38]         | 0.050            | 2.21 [0.52-9.41]           | 0.285        |
| <b>Cephalopelvic Disproportion <sup>a</sup></b>           |                        |                           |                           |                  |                            |              |
| No                                                        | 200 (100.00)           | 1,452 (99.73)             |                           |                  |                            |              |
| Yes                                                       | 0 (0.00)               | 4 (0.27)                  |                           |                  |                            |              |
| <b>Prolapsed Cord <sup>a</sup></b>                        |                        |                           |                           |                  |                            |              |

|                                                             |             |               |                            |                  |                           |                  |
|-------------------------------------------------------------|-------------|---------------|----------------------------|------------------|---------------------------|------------------|
| No                                                          | 200 (100)   | 1,443 (99.11) |                            |                  |                           |                  |
| Yes                                                         | 0 (0.00)    | 13 (0.89)     |                            |                  |                           |                  |
| <b>Precipitate Delivery <sup>a</sup></b>                    |             |               |                            |                  |                           |                  |
| No                                                          | 195 (97.50) | 1,435 (98.56) |                            |                  |                           |                  |
| Yes                                                         | 5 (2.50)    | 21 (1.44)     |                            |                  |                           |                  |
| <b>PPH ≥500mls</b>                                          |             |               |                            |                  |                           |                  |
| No                                                          | 122 (61.00) | 1,077 (73.97) | 1 [referent]               |                  | 1 [referent]              |                  |
| Yes                                                         | 78 (39.00)  | 379 (26.03)   | <b>3.72 [1.41-9.86]</b>    | <b>0.008</b>     | 2.38 [0.84-6.74]          | 0.104            |
| <b>TSR ≥2mins</b>                                           |             |               |                            |                  |                           |                  |
| No                                                          | 163 (81.50) | 1,261 (86.61) | 1 [referent]               |                  | 1 [referent]              |                  |
| Yes                                                         | 37 (18.50)  | 195 (13.39)   | <b>2.80 [1.08-7.22]</b>    | <b>0.034</b>     | 1.55 [0.50-4.86]          | 0.448            |
| <b>Apgar 5-minutes &lt;7 <sup>a</sup></b>                   |             |               |                            |                  |                           |                  |
| No                                                          | 198 (99.00) | 1,425 (97.87) |                            |                  |                           |                  |
| Yes                                                         | 2 (1.00)    | 31 (2.13)     |                            |                  |                           |                  |
| <b>Intubation</b>                                           |             |               |                            |                  |                           |                  |
| No                                                          | 162 (81.00) | 1,227 (84.27) | 1 [referent]               |                  | 1 [referent]              |                  |
| Yes                                                         | 38 (19.00)  | 229 (15.73)   | 1.91 [0.80-4.56]           | 0.147            | 1.32 [0.45-3.90]          | 0.614            |
| <b>Early Preterm Birth</b>                                  |             |               |                            |                  |                           |                  |
| No                                                          | 157 (78.50) | 1,253 (86.06) | 1 [referent]               |                  | 1 [referent]              |                  |
| Yes                                                         | 43 (21.50)  | 203 (13.94)   | 3.73 [0.99-14.09]          | 0.053            | 1.68 [0.48-5.82]          | 0.413            |
| <b>POBW &lt;15<sup>th</sup> Percentile</b>                  |             |               |                            |                  |                           |                  |
| No                                                          | 146 (73.00) | 1,085 (74.52) | 1 [referent]               |                  | 1 [referent]              |                  |
| Yes                                                         | 36 (18.00)  | 181 (12.43)   | 1.83 [0.78-4.33]           | 0.166            | 1.77 [0.72-4.32]          | 0.211            |
| Unavailable                                                 | 18 (9.00)   | 190 (13.05)   |                            |                  |                           |                  |
| <b>Parity</b>                                               |             |               |                            |                  |                           |                  |
| 0                                                           | 65 (32.50)  | 597 (41.00)   | 1 [referent]               |                  | 1 [referent]              |                  |
| 1                                                           | 68 (34.00)  | 515 (35.37)   | 1.51 [0.59-3.86]           | 0.385            | 1.56 [0.38-6.42]          | 0.536            |
| ≥2                                                          | 67 (33.50)  | 344 (23.63)   | <b>4.54 [1.47-14.09]</b>   | <b>0.009</b>     | 2.48 [0.38-15.95]         | 0.340            |
|                                                             |             |               | Overall p-value            | 0.032            | Overall p-value           | 0.633            |
| <b>Child</b>                                                |             |               |                            |                  |                           |                  |
| <b>Sex</b>                                                  |             |               |                            |                  |                           |                  |
| Female                                                      | 87 (43.50)  | 763 (52.40)   | 1 [referent]               |                  | 1 [referent]              |                  |
| Male                                                        | 113 (56.50) | 693 (47.60)   | <b>3.00 [1.56-5.79]</b>    | <b>0.001</b>     | <b>3.26 [1.49-7.10]</b>   | <b>0.003</b>     |
| <b>Ethnicity</b>                                            |             |               |                            |                  |                           |                  |
| Other                                                       | 179 (89.50) | 1,393 (95.67) | 1 [referent]               |                  | 1 [referent]              |                  |
| Indigenous Australian                                       | 21 (10.50)  | 63 (4.33)     | <b>21.66 [2.34-200.50]</b> | <b>0.007</b>     | 0.81 [0.10-6.68]          | 0.842            |
| <b>Child Speaks Language Other Than English at Home</b>     |             |               |                            |                  |                           |                  |
| No                                                          | 161 (80.50) | 1,355 (93.06) | 1 [referent]               |                  | 1 [referent]              |                  |
| Yes                                                         | 39 (19.50)  | 101 (6.94)    | <b>11.16 [3.30-37.77]</b>  | <b>&lt;0.001</b> | <b>17.83 [4.10-77.61]</b> | <b>&lt;0.001</b> |
| <b>Age Category at Time of AEDC Completion <sup>b</sup></b> |             |               |                            |                  |                           |                  |
| 1                                                           | 57 (28.50)  | 264 (18.13)   | <b>5.60 [1.73-18.09]</b>   | <b>0.004</b>     | <b>6.01 [1.97-18.31]</b>  | <b>0.002</b>     |
| 2                                                           | 125 (62.50) | 1,074 (73.76) | 1 [referent]               |                  | 1 [referent]              |                  |
| 3                                                           | 18 (9.00)   | 118 (8.10)    | 1.91 [0.44-8.30]           | 0.387            | 1.30 [0.24-6.95]          | 0.762            |
|                                                             |             |               | Overall p-value            | <b>0.017</b>     | Overall p-value           | <b>0.007</b>     |
| <b>Total Number of Siblings</b>                             |             |               |                            |                  |                           |                  |
| 1                                                           | 49 (24.50)  | 459 (31.52)   | 1 [referent]               |                  | 1 [referent]              |                  |
| 2                                                           | 77 (38.50)  | 577 (39.63)   | 1.54 [0.58-4.13]           | 0.387            | 0.88 [0.20-3.81]          | 0.864            |
| 3                                                           | 37 (18.50)  | 277 (19.02)   | 1.64 [0.49-5.44]           | 0.419            | 1.11 [0.18-6.78]          | 0.913            |
| >3                                                          | 37 (18.50)  | 143 (9.82)    | <b>15.85 [2.91-86.42]</b>  | <b>0.001</b>     | 4.07 [0.48-34.47]         | 0.198            |
|                                                             |             |               | Overall p-value            | <b>0.015</b>     | Overall p-value           | 0.371            |
| <b>Sociodemographic</b>                                     |             |               |                            |                  |                           |                  |
| <b>Index of Relative Socioeconomic Disadvantage</b>         |             |               |                            |                  |                           |                  |
| Lowest Quintile                                             | 153 (76.50) | 1,220 (83.79) | <b>4.24 [1.12-16.03]</b>   | <b>0.033</b>     | 0.92 [0.26-3.26]          | 0.890            |
| > Lowest Quintile                                           | 42 (21.00)  | 195 (13.39)   | 1 [referent]               |                  | 1 [referent]              |                  |
| Unavailable                                                 | 5 (2.50)    | 41 (2.82)     |                            |                  |                           |                  |

<sup>a</sup> Excluded from multivariable analysis due to small N.

<sup>b</sup> Age categories classified as; 1) ≥3 years 10 months to <5 years and one month, 2) ≥5 years and one month to <5 years and 10 months (reference category), 3) ≥5 years and 10 months to <6 years 10 months.
